# Supplementary material for: Selection upon Genome Architecture: Conservation of Functional Neighborhoods with Changing Genes
Source: PLoS Comput Biol. 2010 Oct 7;6(10):e1000953. doi: 10.1371/journal.pcbi.1000953 (PMC2951340; doi:10.1371/journal.pcbi.1000953)
Supplement: Table S3 — List of the genes contained in the functional neighborhoods found. (2.06 MB XLS) [file pcbi.1000953.s007.xls]

## Sheet: Homo sapiens
Chromosome Location	GO term	Genes	FDR p-value
36-chr1-87500000-92500000	response to biotic stimulus	ENSG00000162654|ENSG00000162645|ENSG00000183347|ENSG00000117226|ENSG00000117228|ENSG00000154451|ENSG00000174842|	0.0464367
60-chr1-147500000-152500000	tissue development	ENSG00000159455|ENSG00000198854|ENSG00000169474|ENSG00000163216|ENSG00000143367|ENSG00000169469|ENSG00000143556|	0.0332084
61-chr1-150000000-155000000	tissue development	ENSG00000159455|ENSG00000198854|ENSG00000160783|ENSG00000169474|ENSG00000163216|ENSG00000160685|ENSG00000169469|ENSG00000143556|ENSG00000143320|	0.00280843
63-chr1-155000000-160000000	organismal physiological process	ENSG00000132703|ENSG00000158869|ENSG00000122223|ENSG00000122224|ENSG00000188340|ENSG00000158731|ENSG00000158473|ENSG00000158477|ENSG00000173285|ENSG00000196171|ENSG00000198967|ENSG00000132693|ENSG00000132694|ENSG00000026751|ENSG00000143226|ENSG00000196184|ENSG00000158874|ENSG00000197532|ENSG00000073754|ENSG00000162747|ENSG00000158887|ENSG00000072694|ENSG00000158769|ENSG00000186440|ENSG00000163563…	8.80225e-07
63-chr1-155000000-160000000	response to biotic stimulus	ENSG00000132703|ENSG00000158869|ENSG00000122223|ENSG00000122224|ENSG00000158473|ENSG00000158477|ENSG00000132693|ENSG00000026751|ENSG00000143226|ENSG00000158874|ENSG00000073754|ENSG00000162747|ENSG00000072694|ENSG00000066294|ENSG00000158769|ENSG00000163563|ENSG00000158488|ENSG00000163565|ENSG00000158481|ENSG00000163568|ENSG00000158485|ENSG00000117091|ENSG00000117090|ENSG00000179639|	5.94954e-07
64-chr1-157500000-162500000	response to biotic stimulus	ENSG00000132703|ENSG00000158869|ENSG00000122223|ENSG00000122224|ENSG00000132693|ENSG00000026751|ENSG00000143226|ENSG00000158874|ENSG00000162747|ENSG00000072694|ENSG00000066294|ENSG00000158769|ENSG00000117091|ENSG00000117090|ENSG00000179639|	0.00663246
82-chr1-202500000-207500000	response to biotic stimulus	ENSG00000142224|ENSG00000117335|ENSG00000143466|ENSG00000117322|ENSG00000123838|ENSG00000123843|ENSG00000162894|ENSG00000162891|ENSG00000162892|ENSG00000196188|ENSG00000136634|ENSG00000196352|	0.00176529
83-chr1-205000000-210000000	response to biotic stimulus	ENSG00000142224|ENSG00000117335|ENSG00000117322|ENSG00000123838|ENSG00000123843|ENSG00000162894|ENSG00000162891|ENSG00000162892|ENSG00000136634|ENSG00000196352|	0.00320212
98-chr1-242500000-247500000	cell communication	ENSG00000169214|ENSG00000177212|ENSG00000196936|ENSG00000177174|ENSG00000177489|ENSG00000198281|ENSG00000171180|ENSG00000182783|ENSG00000183130|ENSG00000197454|ENSG00000153230|ENSG00000184022|ENSG00000177151|ENSG00000196242|ENSG00000196240|ENSG00000175143|ENSG00000198128|ENSG00000177275|ENSG00000162727|ENSG00000187701|ENSG00000177201|ENSG00000175180|ENSG00000177233|ENSG00000196772|ENSG00000197437…	1.08489e-12
98-chr1-242500000-247500000	sensory perception	ENSG00000169214|ENSG00000177212|ENSG00000196936|ENSG00000177174|ENSG00000198281|ENSG00000171180|ENSG00000182783|ENSG00000183130|ENSG00000197454|ENSG00000153230|ENSG00000177151|ENSG00000162727|ENSG00000187701|ENSG00000177201|ENSG00000177233|ENSG00000197437|ENSG00000198452|ENSG00000197591|ENSG00000162711|ENSG00000177186|ENSG00000196071|ENSG00000196079|ENSG00000196539|ENSG00000198601|ENSG00000183310|	1.87918e-16
98-chr1-242500000-247500000	organismal physiological process	ENSG00000169214|ENSG00000177212|ENSG00000196936|ENSG00000177174|ENSG00000198281|ENSG00000171180|ENSG00000182783|ENSG00000183130|ENSG00000197454|ENSG00000153230|ENSG00000177151|ENSG00000162727|ENSG00000187701|ENSG00000177201|ENSG00000177233|ENSG00000197437|ENSG00000198452|ENSG00000197591|ENSG00000162711|ENSG00000177186|ENSG00000196071|ENSG00000196079|ENSG00000196539|ENSG00000198601|ENSG00000183310|	6.62074e-06
99-chr1-245000000-250000000	cell communication	ENSG00000169214|ENSG00000177212|ENSG00000196936|ENSG00000177174|ENSG00000177489|ENSG00000198281|ENSG00000171180|ENSG00000182783|ENSG00000183130|ENSG00000197454|ENSG00000153230|ENSG00000184022|ENSG00000177151|ENSG00000196242|ENSG00000196240|ENSG00000175143|ENSG00000198128|ENSG00000177275|ENSG00000162727|ENSG00000187701|ENSG00000177201|ENSG00000175180|ENSG00000177233|ENSG00000196772|ENSG00000197437…	2.16246e-15
99-chr1-245000000-250000000	sensory perception	ENSG00000169214|ENSG00000177212|ENSG00000196936|ENSG00000177174|ENSG00000198281|ENSG00000171180|ENSG00000182783|ENSG00000183130|ENSG00000197454|ENSG00000153230|ENSG00000177151|ENSG00000162727|ENSG00000187701|ENSG00000177201|ENSG00000177233|ENSG00000197437|ENSG00000198452|ENSG00000197591|ENSG00000162711|ENSG00000177186|ENSG00000196071|ENSG00000196079|ENSG00000196539|ENSG00000198601|ENSG00000183310|	1.18115e-17
99-chr1-245000000-250000000	organismal physiological process	ENSG00000169214|ENSG00000177212|ENSG00000196936|ENSG00000177174|ENSG00000198281|ENSG00000171180|ENSG00000182783|ENSG00000183130|ENSG00000197454|ENSG00000153230|ENSG00000177151|ENSG00000162727|ENSG00000187701|ENSG00000177201|ENSG00000177233|ENSG00000197437|ENSG00000198452|ENSG00000197591|ENSG00000162711|ENSG00000177186|ENSG00000196071|ENSG00000196079|ENSG00000196539|ENSG00000198601|ENSG00000183310|	6.9808e-07
35-chr2-85000000-90000000	response to biotic stimulus	ENSG00000153563|ENSG00000163245|ENSG00000122156|ENSG00000042493|ENSG00000172038|ENSG00000172116|ENSG00000173758|ENSG00000169769|ENSG00000173799|ENSG00000115523|ENSG00000153587|ENSG00000153586|ENSG00000173782|ENSG00000184817|	5.20554e-05
36-chr2-87500000-92500000	organismal physiological process	ENSG00000163245|ENSG00000122156|ENSG00000172038|ENSG00000173758|ENSG00000169769|ENSG00000173799|ENSG00000153587|ENSG00000153586|ENSG00000173782|ENSG00000184817|	0.0320114
36-chr2-87500000-92500000	response to biotic stimulus	ENSG00000163245|ENSG00000122156|ENSG00000172038|ENSG00000173758|ENSG00000169769|ENSG00000173799|ENSG00000153587|ENSG00000153586|ENSG00000173782|ENSG00000184817|	4.67099e-05
45-chr2-110000000-115000000	response to biotic stimulus	ENSG00000125538|ENSG00000115008|ENSG00000136689|ENSG00000136688|ENSG00000136696|ENSG00000136697|ENSG00000136694|ENSG00000136695|ENSG00000125571|	0.0196715
46-chr2-112500000-117500000	response to external stimulus	ENSG00000125538|ENSG00000115008|ENSG00000136689|ENSG00000136697|ENSG00000136694|ENSG00000136695|	0.0395484
46-chr2-112500000-117500000	response to biotic stimulus	ENSG00000125538|ENSG00000115008|ENSG00000136689|ENSG00000136688|ENSG00000136696|ENSG00000136697|ENSG00000136694|ENSG00000136695|ENSG00000125571|	0.00311692
13-chr3-30000000-35000000	behavior	ENSG00000153551|ENSG00000183813|ENSG00000170293|ENSG00000091317|	0.0343253
18-chr3-42500000-47500000	homeostasis	ENSG00000163823|ENSG00000121807|ENSG00000173578|ENSG00000183625|ENSG00000012223|ENSG00000173585|	0.0129577
18-chr3-42500000-47500000	behavior	ENSG00000163823|ENSG00000121807|ENSG00000173578|ENSG00000144648|ENSG00000183625|ENSG00000173585|	0.0204247
29-chr4-70000000-75000000	response to abiotic stimulus	ENSG00000135226|ENSG00000173610|ENSG00000163739|ENSG00000056291|ENSG00000124875|ENSG00000126550|ENSG00000156096|ENSG00000169429|	0.00115241
29-chr4-70000000-75000000	organismal physiological process	ENSG00000126549|ENSG00000126545|ENSG00000173610|ENSG00000132465|ENSG00000132464|ENSG00000163739|ENSG00000124875|ENSG00000126550|ENSG00000109272|ENSG00000169429|ENSG00000163631|ENSG00000081051|ENSG00000178522|	0.0386827
30-chr4-72500000-77500000	response to external stimulus	ENSG00000138755|ENSG00000163739|ENSG00000163737|ENSG00000163736|ENSG00000163735|ENSG00000163734|ENSG00000124875|ENSG00000081041|ENSG00000169245|ENSG00000169248|ENSG00000169429|	3.79513e-05
30-chr4-72500000-77500000	sensory perception	ENSG00000156194|ENSG00000163737|ENSG00000163736|ENSG00000163734|ENSG00000124875|ENSG00000081041|ENSG00000169245|ENSG00000169248|ENSG00000169429|	0.0188426
30-chr4-72500000-77500000	response to abiotic stimulus	ENSG00000138755|ENSG00000163739|ENSG00000163737|ENSG00000163736|ENSG00000163735|ENSG00000163734|ENSG00000056291|ENSG00000124875|ENSG00000081041|ENSG00000169245|ENSG00000169248|ENSG00000169429|	5.11873e-07
30-chr4-72500000-77500000	organismal physiological process	ENSG00000156194|ENSG00000138755|ENSG00000163739|ENSG00000163737|ENSG00000163736|ENSG00000163735|ENSG00000163734|ENSG00000124875|ENSG00000118804|ENSG00000081041|ENSG00000169245|ENSG00000169248|ENSG00000109272|ENSG00000169429|ENSG00000163631|ENSG00000081051|ENSG00000179378|	0.00255372
30-chr4-72500000-77500000	response to biotic stimulus	ENSG00000138755|ENSG00000163739|ENSG00000163737|ENSG00000163736|ENSG00000163735|ENSG00000163734|ENSG00000124875|ENSG00000081041|ENSG00000169245|ENSG00000169248|ENSG00000109272|ENSG00000169429|ENSG00000081051|	0.000272915
30-chr4-72500000-77500000	behavior	ENSG00000138755|ENSG00000163739|ENSG00000163737|ENSG00000163736|ENSG00000163735|ENSG00000163734|ENSG00000124875|ENSG00000081041|ENSG00000169245|ENSG00000169248|ENSG00000169429|	5.10321e-09
31-chr4-75000000-80000000	response to external stimulus	ENSG00000138755|ENSG00000163737|ENSG00000163736|ENSG00000163735|ENSG00000163734|ENSG00000081041|ENSG00000169245|ENSG00000169248|ENSG00000156234|	0.0010955
31-chr4-75000000-80000000	sensory perception	ENSG00000156194|ENSG00000163737|ENSG00000163736|ENSG00000163734|ENSG00000081041|ENSG00000169245|ENSG00000169248|ENSG00000156234|	0.0416056
31-chr4-75000000-80000000	response to abiotic stimulus	ENSG00000138755|ENSG00000163737|ENSG00000163736|ENSG00000163735|ENSG00000163734|ENSG00000081041|ENSG00000169245|ENSG00000169248|ENSG00000156234|	0.000260972
31-chr4-75000000-80000000	behavior	ENSG00000138755|ENSG00000163737|ENSG00000163736|ENSG00000163735|ENSG00000163734|ENSG00000081041|ENSG00000169245|ENSG00000169248|ENSG00000156234|	6.9808e-07
35-chr4-85000000-90000000	organ development	ENSG00000152592|ENSG00000152591|ENSG00000029559|ENSG00000152595|ENSG00000163623|ENSG00000118785|ENSG00000118762|	0.00921499
16-chr5-37500000-42500000	death	ENSG00000113600|ENSG00000039537|ENSG00000168621|ENSG00000132357|ENSG00000132356|ENSG00000112936|	0.0143216
56-chr5-137500000-142500000	extracellular structure organization and biogenesis	ENSG00000197479|ENSG00000196963|ENSG00000113205|ENSG00000113209|ENSG00000081818|ENSG00000112852|ENSG00000113211|ENSG00000187372|ENSG00000120324|ENSG00000120327|	4.71888e-12
56-chr5-137500000-142500000	system development	ENSG00000197479|ENSG00000196963|ENSG00000081842|ENSG00000156453|ENSG00000113205|ENSG00000113209|ENSG00000081818|ENSG00000145819|ENSG00000112852|ENSG00000113211|ENSG00000187372|ENSG00000120328|ENSG00000120324|ENSG00000120327|ENSG00000146013|ENSG00000113248|	1.87182e-07
56-chr5-137500000-142500000	cell adhesion	ENSG00000197479|ENSG00000113555|ENSG00000081853|ENSG00000196963|ENSG00000081842|ENSG00000156453|ENSG00000113205|ENSG00000113209|ENSG00000081818|ENSG00000112852|ENSG00000146001|ENSG00000044115|ENSG00000113212|ENSG00000113211|ENSG00000187372|ENSG00000120328|ENSG00000171815|ENSG00000120322|ENSG00000120324|ENSG00000120327|ENSG00000113248|	2.38869e-10
57-chr5-140000000-145000000	extracellular structure organization and biogenesis	ENSG00000197479|ENSG00000196963|ENSG00000113205|ENSG00000113209|ENSG00000081818|ENSG00000112852|ENSG00000113211|ENSG00000187372|ENSG00000120324|ENSG00000120327|	3.27458e-14
57-chr5-140000000-145000000	system development	ENSG00000197479|ENSG00000196963|ENSG00000081842|ENSG00000156453|ENSG00000113205|ENSG00000113209|ENSG00000081818|ENSG00000145819|ENSG00000112852|ENSG00000113211|ENSG00000187372|ENSG00000120328|ENSG00000120324|ENSG00000120327|ENSG00000113248|	8.36688e-10
57-chr5-140000000-145000000	cell adhesion	ENSG00000197479|ENSG00000113555|ENSG00000081853|ENSG00000196963|ENSG00000081842|ENSG00000156453|ENSG00000113205|ENSG00000113209|ENSG00000081818|ENSG00000112852|ENSG00000146001|ENSG00000113212|ENSG00000113211|ENSG00000187372|ENSG00000120328|ENSG00000171815|ENSG00000120322|ENSG00000120324|ENSG00000120327|ENSG00000113248|	3.43047e-14
10-chr6-22500000-27500000	metabolism	ENSG00000196787|ENSG00000187475|ENSG00000010704|ENSG00000124564|ENSG00000180573|ENSG00000137259|ENSG00000188987|ENSG00000196176|ENSG00000124532|ENSG00000197459|ENSG00000164508|ENSG00000197903|ENSG00000198366|ENSG00000026950|ENSG00000196966|ENSG00000168242|ENSG00000198518|ENSG00000178458|ENSG00000196226|ENSG00000112343|ENSG00000124610|ENSG00000184825|ENSG00000112727|ENSG00000158403|ENSG00000197697…	0.00169282
11-chr6-25000000-30000000	metabolism	ENSG00000196787|ENSG00000187475|ENSG00000010704|ENSG00000197202|ENSG00000124564|ENSG00000197153|ENSG00000187626|ENSG00000180573|ENSG00000137259|ENSG00000196866|ENSG00000188987|ENSG00000196747|ENSG00000196176|ENSG00000197459|ENSG00000164508|ENSG00000197903|ENSG00000196374|ENSG00000198366|ENSG00000026950|ENSG00000196966|ENSG00000137338|ENSG00000168242|ENSG00000198518|ENSG00000178458|ENSG00000197657…	6.61144e-08
13-chr6-30000000-35000000	response to biotic stimulus	ENSG00000112493|ENSG00000179344|ENSG00000168384|ENSG00000168383|ENSG00000196301|ENSG00000168394|ENSG00000196735|ENSG00000172899|ENSG00000168379|ENSG00000198502|ENSG00000196126|ENSG00000198559|	0.00570414
11-chr7-25000000-30000000	regulation of physiological process	ENSG00000105991|ENSG00000105997|ENSG00000105996|ENSG00000122565|ENSG00000153814|ENSG00000078399|ENSG00000197576|ENSG00000153807|ENSG00000106004|ENSG00000106006|ENSG00000172115|ENSG00000122592|ENSG00000146592|ENSG00000005073|ENSG00000050344|ENSG00000106031|ENSG00000106038|	0.00355929
11-chr7-25000000-30000000	regulation of cellular process	ENSG00000105991|ENSG00000105997|ENSG00000105996|ENSG00000122565|ENSG00000153814|ENSG00000078399|ENSG00000197576|ENSG00000153807|ENSG00000106004|ENSG00000106006|ENSG00000172115|ENSG00000122592|ENSG00000146592|ENSG00000005073|ENSG00000050344|ENSG00000106031|ENSG00000106038|	0.00467401
57-chr7-140000000-145000000	sensory perception	ENSG00000185899|ENSG00000127364|ENSG00000127366|ENSG00000127362|ENSG00000170356|ENSG00000183609|ENSG00000179420|ENSG00000173525|ENSG00000179468|	0.0148425
2-chr8-2500000-7500000	response to biotic stimulus	ENSG00000177023|ENSG00000177243|ENSG00000198129|ENSG00000185918|ENSG00000164825|ENSG00000164822|ENSG00000164821|ENSG00000186599|ENSG00000177257|ENSG00000164816|ENSG00000187082|	2.79533e-06
2-chr8-2500000-7500000	response to stress	ENSG00000177243|ENSG00000185918|ENSG00000164825|ENSG00000164822|ENSG00000164821|ENSG00000186599|ENSG00000177257|ENSG00000164816|	0.0120158
3-chr8-5000000-10000000	response to abiotic stimulus	ENSG00000185918|ENSG00000164822|ENSG00000164821|ENSG00000171711|ENSG00000175806|ENSG00000177257|ENSG00000164816|	0.0248254
3-chr8-5000000-10000000	response to biotic stimulus	ENSG00000178287|ENSG00000177023|ENSG00000186579|ENSG00000186572|ENSG00000176782|ENSG00000177243|ENSG00000198129|ENSG00000185918|ENSG00000164825|ENSG00000164822|ENSG00000164821|ENSG00000176797|ENSG00000186562|ENSG00000171711|ENSG00000186599|ENSG00000177257|ENSG00000164816|ENSG00000187082|	5.7334e-10
3-chr8-5000000-10000000	response to stress	ENSG00000178287|ENSG00000177243|ENSG00000185918|ENSG00000164825|ENSG00000164822|ENSG00000164821|ENSG00000176797|ENSG00000186562|ENSG00000171711|ENSG00000186599|ENSG00000175806|ENSG00000177257|ENSG00000164816|	0.000242717
10-chr8-22500000-27500000	death	ENSG00000120907|ENSG00000120899|ENSG00000104228|ENSG00000173530|ENSG00000173535|ENSG00000120889|ENSG00000104689|ENSG00000134013|ENSG00000104765|	0.000586135
1-chr9-0-5000000	sex determination	ENSG00000173253|ENSG00000137090|	0.0468149
1-chr9-0-5000000	sex differentiation	ENSG00000064218|ENSG00000173253|ENSG00000137090|	0.00859567
2-chr9-2500000-7500000	physiological interaction between organisms	ENSG00000120211|ENSG00000107014|ENSG00000107018|	0.0322429
2-chr9-2500000-7500000	reproductive physiological process	ENSG00000120211|ENSG00000107014|ENSG00000107018|	0.0416056
3-chr9-5000000-10000000	physiological interaction between organisms	ENSG00000120211|ENSG00000107014|ENSG00000107018|	0.0107824
3-chr9-5000000-10000000	reproductive physiological process	ENSG00000120211|ENSG00000107014|ENSG00000107018|	0.0142535
8-chr9-17500000-22500000	response to biotic stimulus	ENSG00000186809|ENSG00000120247|ENSG00000186803|ENSG00000120242|ENSG00000147877|ENSG00000177047|ENSG00000147873|ENSG00000184995|ENSG00000137026|ENSG00000137080|ENSG00000171855|ENSG00000120235|ENSG00000188379|ENSG00000147885|	8.25641e-08
8-chr9-17500000-22500000	response to stress	ENSG00000186809|ENSG00000120247|ENSG00000186803|ENSG00000120242|ENSG00000147877|ENSG00000177047|ENSG00000147873|ENSG00000184995|ENSG00000137026|ENSG00000137080|ENSG00000171855|ENSG00000120235|ENSG00000188379|ENSG00000147885|	2.83915e-07
9-chr9-20000000-25000000	response to biotic stimulus	ENSG00000186809|ENSG00000120247|ENSG00000186803|ENSG00000120242|ENSG00000147877|ENSG00000177047|ENSG00000147873|ENSG00000184995|ENSG00000137026|ENSG00000137080|ENSG00000171855|ENSG00000120235|ENSG00000188379|ENSG00000147885|	5.8654e-09
9-chr9-20000000-25000000	response to stress	ENSG00000186809|ENSG00000120247|ENSG00000186803|ENSG00000120242|ENSG00000147877|ENSG00000177047|ENSG00000147873|ENSG00000184995|ENSG00000137026|ENSG00000137080|ENSG00000171855|ENSG00000120235|ENSG00000188379|ENSG00000147885|	2.09444e-08
49-chr9-120000000-125000000	sensory perception	ENSG00000136939|ENSG00000171496|ENSG00000171505|ENSG00000197233|ENSG00000136940|ENSG00000171481|ENSG00000165202|ENSG00000165204|ENSG00000136834|	0.00939849
50-chr9-122500000-127500000	sensory perception	ENSG00000148204|ENSG00000136939|ENSG00000171496|ENSG00000171505|ENSG00000197233|ENSG00000136940|ENSG00000171481|ENSG00000165202|ENSG00000165204|ENSG00000136834|	0.0128597
55-chr9-135000000-140000000	localization	ENSG00000196642|ENSG00000122133|ENSG00000122136|ENSG00000188566|ENSG00000148408|ENSG00000160349|ENSG00000187922|ENSG00000107317|ENSG00000160339|ENSG00000198569|ENSG00000123453|ENSG00000176919|ENSG00000107331|ENSG00000148386|ENSG00000184925|ENSG00000165661|ENSG00000160326|ENSG00000177984|ENSG00000169583|ENSG00000172889|ENSG00000176884|ENSG00000130635|ENSG00000085265|ENSG00000187609|ENSG00000171102…	0.0270679
32-chr10-77500000-82500000	homeostasis	ENSG00000122854|ENSG00000122852|ENSG00000185303|ENSG00000182314|ENSG00000133661|	0.00084031
33-chr10-80000000-85000000	homeostasis	ENSG00000122854|ENSG00000122852|ENSG00000185303|ENSG00000182314|ENSG00000133661|	0.000235511
1-chr11-0-5000000	cell communication	ENSG00000176893|ENSG00000176895|ENSG00000129965|ENSG00000069696|ENSG00000175609|ENSG00000177595|ENSG00000176900|ENSG00000176904|ENSG00000176937|ENSG00000185522|ENSG00000188069|ENSG00000184545|ENSG00000064201|ENSG00000197790|ENSG00000182170|ENSG00000078902|ENSG00000197428|ENSG00000180176|ENSG00000130592|ENSG00000167332|ENSG00000176798|ENSG00000171999|ENSG00000129749|ENSG00000177105|ENSG00000180785…	0.0416056
1-chr11-0-5000000	organismal physiological process	ENSG00000176893|ENSG00000176895|ENSG00000129965|ENSG00000175609|ENSG00000177697|ENSG00000176904|ENSG00000078902|ENSG00000197428|ENSG00000130598|ENSG00000130595|ENSG00000180176|ENSG00000130592|ENSG00000185201|ENSG00000167332|ENSG00000185507|ENSG00000176798|ENSG00000129749|ENSG00000053918|ENSG00000181963|ENSG00000184956|ENSG00000110628|ENSG00000196778|ENSG00000176922|ENSG00000185885|ENSG00000070031…	0.0395484
2-chr11-2500000-7500000	cell communication	ENSG00000184698|ENSG00000176893|ENSG00000176895|ENSG00000167355|ENSG00000170782|ENSG00000167359|ENSG00000175609|ENSG00000181009|ENSG00000183251|ENSG00000176787|ENSG00000181001|ENSG00000181609|ENSG00000187918|ENSG00000176900|ENSG00000180909|ENSG00000176904|ENSG00000176937|ENSG00000188069|ENSG00000180913|ENSG00000180919|ENSG00000197790|ENSG00000181616|ENSG00000176748|ENSG00000182170|ENSG00000166387…	1.47225e-15
2-chr11-2500000-7500000	sensory perception	ENSG00000184698|ENSG00000176893|ENSG00000176895|ENSG00000167355|ENSG00000167359|ENSG00000175609|ENSG00000181009|ENSG00000183251|ENSG00000176787|ENSG00000181001|ENSG00000181609|ENSG00000187918|ENSG00000176904|ENSG00000180919|ENSG00000176748|ENSG00000176239|ENSG00000176742|ENSG00000197428|ENSG00000167332|ENSG00000180947|ENSG00000184478|ENSG00000170803|ENSG00000170790|ENSG00000110148|ENSG00000176798…	5.23427e-21
2-chr11-2500000-7500000	organismal physiological process	ENSG00000184698|ENSG00000176893|ENSG00000176895|ENSG00000167355|ENSG00000167359|ENSG00000175609|ENSG00000181009|ENSG00000183251|ENSG00000176787|ENSG00000181001|ENSG00000181609|ENSG00000187918|ENSG00000176904|ENSG00000180919|ENSG00000176748|ENSG00000176239|ENSG00000176742|ENSG00000197428|ENSG00000167332|ENSG00000180947|ENSG00000184478|ENSG00000170803|ENSG00000170790|ENSG00000110148|ENSG00000176798…	6.40399e-07
3-chr11-5000000-10000000	cell communication	ENSG00000184698|ENSG00000167355|ENSG00000170782|ENSG00000167359|ENSG00000181009|ENSG00000183251|ENSG00000176787|ENSG00000181001|ENSG00000181609|ENSG00000187918|ENSG00000180909|ENSG00000180913|ENSG00000180919|ENSG00000181616|ENSG00000176748|ENSG00000166387|ENSG00000176239|ENSG00000176742|ENSG00000187747|ENSG00000176716|ENSG00000166333|ENSG00000180947|ENSG00000184478|ENSG00000170803|ENSG00000188124…	8.28987e-10
3-chr11-5000000-10000000	sensory perception	ENSG00000184698|ENSG00000167355|ENSG00000167359|ENSG00000181009|ENSG00000183251|ENSG00000176787|ENSG00000181001|ENSG00000181609|ENSG00000187918|ENSG00000180919|ENSG00000176748|ENSG00000176239|ENSG00000176742|ENSG00000180947|ENSG00000184478|ENSG00000170803|ENSG00000170790|ENSG00000110148|ENSG00000175393|ENSG00000180988|ENSG00000184321|ENSG00000166368|ENSG00000183269|ENSG00000180974|ENSG00000183303…	6.64362e-18
3-chr11-5000000-10000000	organismal physiological process	ENSG00000184698|ENSG00000167355|ENSG00000167359|ENSG00000181009|ENSG00000183251|ENSG00000176787|ENSG00000181001|ENSG00000181609|ENSG00000187918|ENSG00000180919|ENSG00000176748|ENSG00000176239|ENSG00000176742|ENSG00000180947|ENSG00000184478|ENSG00000170803|ENSG00000170790|ENSG00000110148|ENSG00000175393|ENSG00000132274|ENSG00000180988|ENSG00000184321|ENSG00000166368|ENSG00000183269|ENSG00000180974…	4.59388e-05
22-chr11-52500000-57500000	cell communication	ENSG00000149133|ENSG00000172459|ENSG00000172457|ENSG00000181903|ENSG00000172199|ENSG00000172489|ENSG00000156575|ENSG00000172487|ENSG00000172188|ENSG00000184741|ENSG00000181296|ENSG00000186124|ENSG00000167822|ENSG00000181927|ENSG00000167825|ENSG00000174914|ENSG00000174982|ENSG00000181752|ENSG00000174970|ENSG00000197468|ENSG00000181761|ENSG00000188439|ENSG00000181273|ENSG00000109991|ENSG00000181767…	7.49559e-20
22-chr11-52500000-57500000	sensory perception	ENSG00000149133|ENSG00000172459|ENSG00000181903|ENSG00000172487|ENSG00000167822|ENSG00000181927|ENSG00000167825|ENSG00000174914|ENSG00000174982|ENSG00000181752|ENSG00000174970|ENSG00000181761|ENSG00000181273|ENSG00000181767|ENSG00000181785|ENSG00000174957|ENSG00000181961|ENSG00000181371|ENSG00000174942|ENSG00000186117|ENSG00000172464|ENSG00000181693|ENSG00000186113|ENSG00000181282|ENSG00000181698…	1.72288e-20
22-chr11-52500000-57500000	organismal physiological process	ENSG00000149131|ENSG00000149133|ENSG00000172459|ENSG00000186652|ENSG00000181903|ENSG00000156575|ENSG00000172487|ENSG00000167822|ENSG00000181927|ENSG00000167825|ENSG00000174914|ENSG00000174982|ENSG00000181752|ENSG00000174970|ENSG00000181761|ENSG00000181273|ENSG00000181767|ENSG00000181785|ENSG00000174957|ENSG00000181961|ENSG00000181371|ENSG00000174942|ENSG00000186117|ENSG00000172464|ENSG00000181693…	9.02671e-09
23-chr11-55000000-60000000	cell communication	ENSG00000166928|ENSG00000149516|ENSG00000166927|ENSG00000166926|ENSG00000149133|ENSG00000172459|ENSG00000172457|ENSG00000172289|ENSG00000172381|ENSG00000181903|ENSG00000172199|ENSG00000172489|ENSG00000156575|ENSG00000172487|ENSG00000166884|ENSG00000198283|ENSG00000172188|ENSG00000184741|ENSG00000181296|ENSG00000172365|ENSG00000172362|ENSG00000186124|ENSG00000167822|ENSG00000181927|ENSG00000167825…	7.35061e-30
23-chr11-55000000-60000000	sensory perception	ENSG00000149133|ENSG00000172459|ENSG00000172289|ENSG00000172381|ENSG00000181903|ENSG00000172487|ENSG00000166884|ENSG00000172365|ENSG00000172362|ENSG00000167822|ENSG00000181927|ENSG00000167825|ENSG00000174914|ENSG00000174982|ENSG00000181752|ENSG00000174970|ENSG00000172320|ENSG00000172769|ENSG00000172324|ENSG00000181761|ENSG00000181273|ENSG00000181767|ENSG00000181785|ENSG00000174957|ENSG00000176495…	1.73613e-28
23-chr11-55000000-60000000	organismal physiological process	ENSG00000149131|ENSG00000149133|ENSG00000172459|ENSG00000186652|ENSG00000172289|ENSG00000172381|ENSG00000181903|ENSG00000156575|ENSG00000172487|ENSG00000166884|ENSG00000172365|ENSG00000172362|ENSG00000167822|ENSG00000181927|ENSG00000167825|ENSG00000174914|ENSG00000174982|ENSG00000181752|ENSG00000174970|ENSG00000172320|ENSG00000172769|ENSG00000172324|ENSG00000181761|ENSG00000181273|ENSG00000181767…	9.94332e-13
24-chr11-57500000-62500000	cell communication	ENSG00000166928|ENSG00000149516|ENSG00000166927|ENSG00000166926|ENSG00000162188|ENSG00000172289|ENSG00000172381|ENSG00000166884|ENSG00000198283|ENSG00000168539|ENSG00000183134|ENSG00000172365|ENSG00000172362|ENSG00000149485|ENSG00000149021|ENSG00000172689|ENSG00000172320|ENSG00000172769|ENSG00000071203|ENSG00000172324|ENSG00000166930|ENSG00000110031|ENSG00000172742|ENSG00000186513|ENSG00000166961…	0.000317727
24-chr11-57500000-62500000	sensory perception	ENSG00000172289|ENSG00000172381|ENSG00000166884|ENSG00000172365|ENSG00000172362|ENSG00000149489|ENSG00000172320|ENSG00000172769|ENSG00000172324|ENSG00000167995|ENSG00000176495|ENSG00000172377|ENSG00000172772|ENSG00000186509|ENSG00000176200|ENSG00000176205|ENSG00000180475|	0.000397516
41-chr11-100000000-105000000	death	ENSG00000110330|ENSG00000118168|ENSG00000196954|ENSG00000023445|ENSG00000137757|ENSG00000137752|	0.0468149
42-chr11-102500000-107500000	death	ENSG00000110675|ENSG00000118168|ENSG00000196954|ENSG00000137757|ENSG00000137752|ENSG00000166266|	0.00255372
49-chr11-120000000-125000000	cell communication	ENSG00000197309|ENSG00000181518|ENSG00000198674|ENSG00000196248|ENSG00000149403|ENSG00000181214|ENSG00000171014|ENSG00000182634|ENSG00000186268|ENSG00000198657|ENSG00000197263|ENSG00000196119|ENSG00000197125|ENSG00000170953|ENSG00000154146|ENSG00000196341|ENSG00000185932|ENSG00000196403|ENSG00000196703|ENSG00000181457|ENSG00000196099|ENSG00000197849|ENSG00000064199|ENSG00000181499|ENSG00000196661…	0.00387128
49-chr11-120000000-125000000	sensory perception	ENSG00000181518|ENSG00000154134|ENSG00000171014|ENSG00000182634|ENSG00000109927|ENSG00000186268|ENSG00000198657|ENSG00000197263|ENSG00000197125|ENSG00000170953|ENSG00000196341|ENSG00000196703|ENSG00000181457|ENSG00000196099|ENSG00000197849|ENSG00000181499|ENSG00000196661|ENSG00000173365|	2.8006e-09
49-chr11-120000000-125000000	organismal physiological process	ENSG00000181518|ENSG00000149403|ENSG00000154134|ENSG00000171014|ENSG00000182634|ENSG00000109927|ENSG00000186268|ENSG00000198657|ENSG00000197263|ENSG00000197125|ENSG00000170953|ENSG00000196341|ENSG00000196703|ENSG00000181457|ENSG00000196099|ENSG00000197849|ENSG00000181499|ENSG00000196661|ENSG00000173365|	0.00868675
50-chr11-122500000-127500000	sensory perception	ENSG00000181518|ENSG00000154134|ENSG00000171014|ENSG00000182634|ENSG00000186268|ENSG00000198657|ENSG00000197263|ENSG00000197125|ENSG00000170953|ENSG00000196341|ENSG00000196703|ENSG00000181457|ENSG00000196099|ENSG00000197849|ENSG00000181499|ENSG00000196661|ENSG00000173365|	6.64191e-08
50-chr11-122500000-127500000	organismal physiological process	ENSG00000181518|ENSG00000154134|ENSG00000171014|ENSG00000182634|ENSG00000186268|ENSG00000198657|ENSG00000197263|ENSG00000197125|ENSG00000170953|ENSG00000196341|ENSG00000196703|ENSG00000181457|ENSG00000196099|ENSG00000197849|ENSG00000181499|ENSG00000150455|ENSG00000196661|ENSG00000173365|	0.0474973
53-chr11-130000000-135000000	cell recognition	ENSG00000183715|ENSG00000182667|	0.0322429
3-chr12-5000000-10000000	organismal physiological process	ENSG00000110799|ENSG00000198178|ENSG00000171860|ENSG00000069493|ENSG00000110852|ENSG00000111321|ENSG00000166523|ENSG00000166527|ENSG00000182326|ENSG00000139187|ENSG00000010610|ENSG00000139193|ENSG00000010278|ENSG00000111319|ENSG00000111729|ENSG00000111664|ENSG00000111796|ENSG00000159335|ENSG00000150045|ENSG00000177575|ENSG00000126838|ENSG00000111732|	0.0474973
3-chr12-5000000-10000000	response to biotic stimulus	ENSG00000198178|ENSG00000171860|ENSG00000089693|ENSG00000069493|ENSG00000110852|ENSG00000111321|ENSG00000166523|ENSG00000166527|ENSG00000182326|ENSG00000139187|ENSG00000010610|ENSG00000139193|ENSG00000111729|ENSG00000110848|ENSG00000111796|ENSG00000159335|ENSG00000150045|ENSG00000177575|ENSG00000111732|	3.77952e-05
3-chr12-5000000-10000000	response to stress	ENSG00000110799|ENSG00000171860|ENSG00000069493|ENSG00000110852|ENSG00000166523|ENSG00000182326|ENSG00000139187|ENSG00000010610|ENSG00000139193|ENSG00000010278|ENSG00000111729|ENSG00000111796|ENSG00000159335|ENSG00000150045|ENSG00000177575|	0.0362669
4-chr12-7500000-12500000	organismal physiological process	ENSG00000134539|ENSG00000121377|ENSG00000198178|ENSG00000171860|ENSG00000183542|ENSG00000069493|ENSG00000173391|ENSG00000139112|ENSG00000110852|ENSG00000134545|ENSG00000121318|ENSG00000121314|ENSG00000121381|ENSG00000166523|ENSG00000166527|ENSG00000111215|ENSG00000139187|ENSG00000111729|ENSG00000111796|ENSG00000186136|ENSG00000172243|ENSG00000021602|ENSG00000150045|ENSG00000177575|ENSG00000126838…	1.57485e-05
4-chr12-7500000-12500000	response to biotic stimulus	ENSG00000134539|ENSG00000198178|ENSG00000171860|ENSG00000183542|ENSG00000069493|ENSG00000173391|ENSG00000110852|ENSG00000134545|ENSG00000166523|ENSG00000166527|ENSG00000139187|ENSG00000111729|ENSG00000110848|ENSG00000165682|ENSG00000111796|ENSG00000172243|ENSG00000021602|ENSG00000150045|ENSG00000177575|ENSG00000111732|	4.13267e-07
4-chr12-7500000-12500000	response to stress	ENSG00000134539|ENSG00000060138|ENSG00000171860|ENSG00000183542|ENSG00000069493|ENSG00000173391|ENSG00000110852|ENSG00000134545|ENSG00000166523|ENSG00000139187|ENSG00000111729|ENSG00000111796|ENSG00000172243|ENSG00000021602|ENSG00000150045|ENSG00000177575|	0.00156981
5-chr12-10000000-15000000	cell communication	ENSG00000173342|ENSG00000134539|ENSG00000121377|ENSG00000150086|ENSG00000183542|ENSG00000070019|ENSG00000070018|ENSG00000139112|ENSG00000134551|ENSG00000134545|ENSG00000121318|ENSG00000196229|ENSG00000197837|ENSG00000121314|ENSG00000121381|ENSG00000183935|ENSG00000111266|ENSG00000111269|ENSG00000013588|ENSG00000165682|ENSG00000183150|ENSG00000186136|ENSG00000111348|ENSG00000172243|ENSG00000021602…	0.00515301
20-chr12-47500000-52500000	tissue development	ENSG00000186081|ENSG00000135443|ENSG00000167768|ENSG00000170465|ENSG00000185479|ENSG00000170523|ENSG00000172867|	0.0380804
21-chr12-50000000-55000000	tissue development	ENSG00000186081|ENSG00000135443|ENSG00000167768|ENSG00000170465|ENSG00000185479|ENSG00000135414|ENSG00000170523|ENSG00000123388|ENSG00000172867|	0.00323371
46-chr13-112500000-117500000	coagulation	ENSG00000126231|ENSG00000057593|ENSG00000126218|	0.0452902
7-chr14-15000000-20000000	cell communication	ENSG00000176299|ENSG00000176294|ENSG00000176230|ENSG00000155249|ENSG00000176198|ENSG00000176281|ENSG00000196143|ENSG00000165762|ENSG00000176312|ENSG00000184394|ENSG00000176213|ENSG00000176219|ENSG00000176253|ENSG00000196832|ENSG00000186445|ENSG00000169484|ENSG00000169488|ENSG00000182652|ENSG00000176246|	0.000118566
7-chr14-15000000-20000000	sensory perception	ENSG00000176299|ENSG00000176294|ENSG00000155249|ENSG00000176198|ENSG00000176281|ENSG00000165762|ENSG00000184394|ENSG00000176219|ENSG00000176253|ENSG00000169484|ENSG00000182652|ENSG00000176246|	6.20645e-07
7-chr14-15000000-20000000	organismal physiological process	ENSG00000176299|ENSG00000176294|ENSG00000155249|ENSG00000176198|ENSG00000176281|ENSG00000165762|ENSG00000184394|ENSG00000176219|ENSG00000176253|ENSG00000169484|ENSG00000182652|ENSG00000176246|	0.0440659
8-chr14-17500000-22500000	sensory perception	ENSG00000176299|ENSG00000176294|ENSG00000155249|ENSG00000176198|ENSG00000176281|ENSG00000165762|ENSG00000172611|ENSG00000184394|ENSG00000092200|ENSG00000176219|ENSG00000176253|ENSG00000169208|ENSG00000169202|ENSG00000169484|ENSG00000169385|ENSG00000182652|ENSG00000176246|	4.43127e-06
8-chr14-17500000-22500000	organismal physiological process	ENSG00000176299|ENSG00000176294|ENSG00000092217|ENSG00000155249|ENSG00000176198|ENSG00000176281|ENSG00000165762|ENSG00000172611|ENSG00000184394|ENSG00000166056|ENSG00000092200|ENSG00000176219|ENSG00000181562|ENSG00000176253|ENSG00000165799|ENSG00000169208|ENSG00000169202|ENSG00000169484|ENSG00000169385|ENSG00000129563|ENSG00000182652|ENSG00000176246|	0.0316175
43-chr14-105000000-110000000	response to biotic stimulus	ENSG00000177154|ENSG00000182351|ENSG00000177199|ENSG00000130076|	0.0155067
41-chr15-100000000-105000000	sensory perception	ENSG00000184140|ENSG00000186092|ENSG00000182854|ENSG00000198615|	0.0428421
25-chr16-60000000-65000000	cell adhesion	ENSG00000140937|ENSG00000179776|ENSG00000150394|	0.0473697
1-chr17-0-5000000	sensory perception	ENSG00000159961|ENSG00000180090|ENSG00000174231|ENSG00000174238|ENSG00000172146|ENSG00000141480|ENSG00000182880|ENSG00000183024|ENSG00000180016|ENSG00000180068|ENSG00000172150|ENSG00000184166|ENSG00000161921|ENSG00000127780|	0.00481132
5-chr17-10000000-15000000	organ development	ENSG00000006788|ENSG00000125414|ENSG00000133020|ENSG00000141048|ENSG00000109063|ENSG00000109061|	0.0145076
11-chr17-25000000-30000000	response to abiotic stimulus	ENSG00000108688|ENSG00000181374|ENSG00000172156|ENSG00000108700|ENSG00000108702|ENSG00000108691|	0.0343253
11-chr17-25000000-30000000	homeostasis	ENSG00000108688|ENSG00000181374|ENSG00000172156|ENSG00000108702|ENSG00000108691|	0.00930915
11-chr17-25000000-30000000	behavior	ENSG00000108688|ENSG00000181374|ENSG00000172156|ENSG00000108700|ENSG00000108702|ENSG00000108691|	0.000907623
12-chr17-27500000-32500000	response to external stimulus	ENSG00000108688|ENSG00000167236|ENSG00000161573|ENSG00000161570|ENSG00000161574|ENSG00000006074|ENSG00000006075|ENSG00000181374|ENSG00000172156|ENSG00000108700|ENSG00000108702|ENSG00000129277|ENSG00000108691|	4.61327e-07
12-chr17-27500000-32500000	sensory perception	ENSG00000108688|ENSG00000167236|ENSG00000161573|ENSG00000161570|ENSG00000161574|ENSG00000006074|ENSG00000006075|ENSG00000181374|ENSG00000172156|ENSG00000108700|ENSG00000108702|ENSG00000129277|ENSG00000108691|	7.59367e-06
12-chr17-27500000-32500000	response to abiotic stimulus	ENSG00000108688|ENSG00000167236|ENSG00000161573|ENSG00000161570|ENSG00000161574|ENSG00000006074|ENSG00000006075|ENSG00000181374|ENSG00000172156|ENSG00000108700|ENSG00000108702|ENSG00000129277|ENSG00000108691|	5.6679e-08
12-chr17-27500000-32500000	homeostasis	ENSG00000108688|ENSG00000167236|ENSG00000161570|ENSG00000161574|ENSG00000006075|ENSG00000181374|ENSG00000172156|ENSG00000108702|ENSG00000108691|	1.31491e-06
12-chr17-27500000-32500000	response to biotic stimulus	ENSG00000108688|ENSG00000167236|ENSG00000161573|ENSG00000161570|ENSG00000161574|ENSG00000006074|ENSG00000006075|ENSG00000181374|ENSG00000172156|ENSG00000108700|ENSG00000108702|ENSG00000129277|ENSG00000108691|	0.000389748
12-chr17-27500000-32500000	behavior	ENSG00000108688|ENSG00000167236|ENSG00000161573|ENSG00000161570|ENSG00000161574|ENSG00000006074|ENSG00000006075|ENSG00000181374|ENSG00000172156|ENSG00000108700|ENSG00000108702|ENSG00000129277|ENSG00000108691|	7.58894e-12
12-chr17-27500000-32500000	response to stress	ENSG00000108688|ENSG00000167236|ENSG00000161573|ENSG00000161570|ENSG00000161574|ENSG00000185379|ENSG00000005156|ENSG00000006074|ENSG00000006075|ENSG00000181374|ENSG00000172156|ENSG00000092871|ENSG00000108700|ENSG00000108702|ENSG00000129277|ENSG00000108691|	2.79533e-06
13-chr17-30000000-35000000	behavior	ENSG00000167236|ENSG00000161573|ENSG00000161570|ENSG00000161574|ENSG00000006074|ENSG00000006075|ENSG00000129277|	0.00444019
14-chr17-32500000-37500000	tissue development	ENSG00000131737|ENSG00000171403|ENSG00000171401|ENSG00000186847|ENSG00000108759|ENSG00000186395|ENSG00000171346|ENSG00000094796|ENSG00000161405|ENSG00000186831|ENSG00000186832|	2.01064e-06
15-chr17-35000000-40000000	tissue development	ENSG00000131737|ENSG00000171403|ENSG00000171401|ENSG00000186847|ENSG00000167941|ENSG00000108759|ENSG00000186395|ENSG00000171346|ENSG00000094796|ENSG00000161405|ENSG00000186831|ENSG00000186832|	1.83979e-05
10-chr18-22500000-27500000	cell adhesion	ENSG00000175065|ENSG00000134760|ENSG00000134762|ENSG00000134765|ENSG00000170558|ENSG00000134755|ENSG00000134757|ENSG00000046604|	1.08791e-05
11-chr18-25000000-30000000	cell adhesion	ENSG00000175065|ENSG00000134760|ENSG00000134762|ENSG00000134765|ENSG00000134755|ENSG00000134757|ENSG00000046604|	0.000575781
4-chr19-7500000-12500000	regulation of physiological process	ENSG00000196646|ENSG00000105401|ENSG00000196484|ENSG00000196757|ENSG00000198342|ENSG00000177599|ENSG00000142453|ENSG00000196826|ENSG00000188629|ENSG00000188321|ENSG00000132010|ENSG00000090661|ENSG00000180855|ENSG00000104976|ENSG00000130818|ENSG00000188868|ENSG00000130816|ENSG00000171291|ENSG00000174652|ENSG00000197857|ENSG00000171295|ENSG00000130811|ENSG00000167785|ENSG00000196110|ENSG00000196605…	0.000637404
4-chr19-7500000-12500000	regulation of cellular process	ENSG00000196646|ENSG00000105401|ENSG00000196484|ENSG00000196757|ENSG00000198342|ENSG00000177599|ENSG00000142453|ENSG00000196826|ENSG00000188629|ENSG00000188321|ENSG00000132010|ENSG00000090661|ENSG00000180855|ENSG00000104976|ENSG00000130818|ENSG00000188868|ENSG00000130816|ENSG00000171291|ENSG00000174652|ENSG00000197857|ENSG00000171295|ENSG00000130811|ENSG00000167785|ENSG00000196110|ENSG00000196605…	0.00113731
9-chr19-20000000-25000000	regulation of physiological process	ENSG00000167232|ENSG00000198521|ENSG00000196268|ENSG00000197360|ENSG00000183850|ENSG00000196721|ENSG00000172687|ENSG00000160229|ENSG00000180081|ENSG00000196686|ENSG00000118620|ENSG00000197134|ENSG00000160352|ENSG00000105750|ENSG00000197372|ENSG00000196705|ENSG00000197020|ENSG00000104777|ENSG00000196350|	4.61327e-07
9-chr19-20000000-25000000	regulation of cellular process	ENSG00000167232|ENSG00000198521|ENSG00000196268|ENSG00000197360|ENSG00000183850|ENSG00000196721|ENSG00000172687|ENSG00000160229|ENSG00000180081|ENSG00000196686|ENSG00000118620|ENSG00000197134|ENSG00000160352|ENSG00000105750|ENSG00000197372|ENSG00000196705|ENSG00000197020|ENSG00000104777|ENSG00000196350|	6.20645e-07
9-chr19-20000000-25000000	metabolism	ENSG00000167232|ENSG00000198521|ENSG00000196268|ENSG00000197360|ENSG00000183850|ENSG00000196721|ENSG00000172687|ENSG00000160229|ENSG00000180081|ENSG00000196686|ENSG00000118620|ENSG00000197134|ENSG00000196988|ENSG00000160352|ENSG00000105750|ENSG00000197372|ENSG00000196705|ENSG00000197020|ENSG00000198024|ENSG00000104777|ENSG00000196350|	0.0138885
10-chr19-22500000-27500000	regulation of physiological process	ENSG00000167232|ENSG00000197360|ENSG00000183850|ENSG00000180081|ENSG00000196686|ENSG00000197372|ENSG00000196350|	0.0274461
10-chr19-22500000-27500000	regulation of cellular process	ENSG00000167232|ENSG00000197360|ENSG00000183850|ENSG00000180081|ENSG00000196686|ENSG00000197372|ENSG00000196350|	0.0316175
16-chr19-37500000-42500000	regulation of physiological process	ENSG00000161298|ENSG00000181007|ENSG00000105698|ENSG00000197800|ENSG00000196761|ENSG00000197808|ENSG00000185869|ENSG00000196967|ENSG00000105663|ENSG00000168661|ENSG00000105672|ENSG00000167637|ENSG00000105679|ENSG00000167635|ENSG00000186020|ENSG00000197050|ENSG00000011590|ENSG00000197863|ENSG00000198453|ENSG00000126247|ENSG00000153879|ENSG00000153896|ENSG00000188283|ENSG00000168813|ENSG00000089335…	0.0345493
16-chr19-37500000-42500000	regulation of cellular process	ENSG00000161298|ENSG00000181007|ENSG00000105698|ENSG00000197800|ENSG00000196761|ENSG00000197808|ENSG00000185869|ENSG00000196967|ENSG00000105663|ENSG00000168661|ENSG00000105672|ENSG00000167637|ENSG00000105679|ENSG00000167635|ENSG00000186020|ENSG00000197050|ENSG00000011590|ENSG00000197863|ENSG00000198453|ENSG00000126247|ENSG00000153879|ENSG00000153896|ENSG00000188283|ENSG00000089327|ENSG00000168813…	0.0208444
17-chr19-40000000-45000000	regulation of cellular process	ENSG00000161298|ENSG00000181007|ENSG00000171777|ENSG00000196437|ENSG00000198182|ENSG00000105698|ENSG00000197800|ENSG00000196761|ENSG00000197808|ENSG00000120784|ENSG00000185869|ENSG00000196967|ENSG00000105663|ENSG00000168661|ENSG00000105672|ENSG00000167637|ENSG00000105679|ENSG00000167635|ENSG00000068903|ENSG00000186020|ENSG00000197050|ENSG00000189164|ENSG00000011590|ENSG00000197863|ENSG00000099341…	0.00921499
19-chr19-45000000-50000000	regulation of physiological process	ENSG00000178386|ENSG00000028277|ENSG00000062370|ENSG00000069399|ENSG00000079432|ENSG00000090006|ENSG00000167601|ENSG00000187187|ENSG00000197782|ENSG00000176232|ENSG00000131115|ENSG00000124459|ENSG00000167383|ENSG00000167380|ENSG00000167384|ENSG00000160460|ENSG00000128000|ENSG00000105204|ENSG00000186026|ENSG00000171570|ENSG00000159905|ENSG00000159904|ENSG00000176222|ENSG00000160570|ENSG00000159917…	0.00384417
19-chr19-45000000-50000000	physiological interaction between organisms	ENSG00000124435|ENSG00000131113|ENSG00000079385|ENSG00000124467|ENSG00000170853|ENSG00000189231|ENSG00000183668|ENSG00000170848|	3.02859e-06
19-chr19-45000000-50000000	regulation of cellular process	ENSG00000178386|ENSG00000028277|ENSG00000062370|ENSG00000069399|ENSG00000079432|ENSG00000090006|ENSG00000167601|ENSG00000187187|ENSG00000197782|ENSG00000176232|ENSG00000131115|ENSG00000124459|ENSG00000167383|ENSG00000167380|ENSG00000167384|ENSG00000160460|ENSG00000128000|ENSG00000105204|ENSG00000186026|ENSG00000171570|ENSG00000159905|ENSG00000159904|ENSG00000176222|ENSG00000160570|ENSG00000159917…	0.00620113
19-chr19-45000000-50000000	reproductive physiological process	ENSG00000124435|ENSG00000131113|ENSG00000079385|ENSG00000124467|ENSG00000170853|ENSG00000189231|ENSG00000183668|ENSG00000170848|	6.93767e-06
20-chr19-47500000-52500000	regulation of physiological process	ENSG00000178386|ENSG00000062370|ENSG00000069399|ENSG00000104856|ENSG00000188425|ENSG00000176232|ENSG00000131115|ENSG00000124459|ENSG00000130203|ENSG00000007047|ENSG00000167383|ENSG00000167380|ENSG00000167384|ENSG00000177045|ENSG00000176182|ENSG00000186026|ENSG00000042753|ENSG00000170608|ENSG00000160007|ENSG00000159905|ENSG00000159904|ENSG00000176222|ENSG00000159917|ENSG00000159885|ENSG00000159882…	0.015472
20-chr19-47500000-52500000	physiological interaction between organisms	ENSG00000124435|ENSG00000131113|ENSG00000079385|ENSG00000124467|ENSG00000170853|ENSG00000189231|ENSG00000183668|ENSG00000170848|	1.60218e-06
20-chr19-47500000-52500000	regulation of cellular process	ENSG00000178386|ENSG00000062370|ENSG00000069399|ENSG00000104856|ENSG00000188425|ENSG00000176232|ENSG00000131115|ENSG00000124459|ENSG00000130203|ENSG00000007047|ENSG00000167383|ENSG00000167380|ENSG00000167384|ENSG00000177045|ENSG00000011485|ENSG00000176182|ENSG00000186026|ENSG00000042753|ENSG00000170608|ENSG00000160007|ENSG00000159905|ENSG00000159904|ENSG00000176222|ENSG00000159917|ENSG00000159885…	0.0100296
20-chr19-47500000-52500000	reproductive physiological process	ENSG00000124435|ENSG00000131113|ENSG00000079385|ENSG00000124467|ENSG00000170853|ENSG00000189231|ENSG00000183668|ENSG00000170848|	3.59284e-06
24-chr19-57500000-62500000	regulation of physiological process	ENSG00000198046|ENSG00000018869|ENSG00000197951|ENSG00000198346|ENSG00000196867|ENSG00000196263|ENSG00000198440|ENSG00000167766|ENSG00000175885|ENSG00000131848|ENSG00000095752|ENSG00000083844|ENSG00000189430|ENSG00000105066|ENSG00000129991|ENSG00000197928|ENSG00000196390|ENSG00000167685|ENSG00000123870|ENSG00000170954|ENSG00000197714|ENSG00000197937|ENSG00000105048|ENSG00000198300|ENSG00000141946…	0.011797
24-chr19-57500000-62500000	response to biotic stimulus	ENSG00000186152|ENSG00000170866|ENSG00000095752|ENSG00000189430|ENSG00000167633|ENSG00000189096|ENSG00000167634|ENSG00000104974|ENSG00000104972|ENSG00000022556|ENSG00000125498|ENSG00000186818|ENSG00000170858|ENSG00000186431|ENSG00000131042|ENSG00000142405|ENSG00000187095|ENSG00000105609|	0.00311817
25-chr19-60000000-65000000	regulation of physiological process	ENSG00000198046|ENSG00000018869|ENSG00000197951|ENSG00000176293|ENSG00000121406|ENSG00000196867|ENSG00000196263|ENSG00000121417|ENSG00000130726|ENSG00000121413|ENSG00000198440|ENSG00000180532|ENSG00000166704|ENSG00000152454|ENSG00000099326|ENSG00000131845|ENSG00000131848|ENSG00000131849|ENSG00000105132|ENSG00000198131|ENSG00000105136|ENSG00000095752|ENSG00000083842|ENSG00000083844|ENSG00000189430…	2.10677e-13
25-chr19-60000000-65000000	regulation of cellular process	ENSG00000198046|ENSG00000018869|ENSG00000197951|ENSG00000176293|ENSG00000121406|ENSG00000196867|ENSG00000196263|ENSG00000121417|ENSG00000130726|ENSG00000121413|ENSG00000198440|ENSG00000180532|ENSG00000166704|ENSG00000152454|ENSG00000099326|ENSG00000131845|ENSG00000131848|ENSG00000131849|ENSG00000105132|ENSG00000198131|ENSG00000105136|ENSG00000095752|ENSG00000083842|ENSG00000083844|ENSG00000189430…	1.79983e-11
25-chr19-60000000-65000000	metabolism	ENSG00000198046|ENSG00000018869|ENSG00000197951|ENSG00000176293|ENSG00000121406|ENSG00000196867|ENSG00000196263|ENSG00000121417|ENSG00000130725|ENSG00000130726|ENSG00000121413|ENSG00000198440|ENSG00000180532|ENSG00000166704|ENSG00000152454|ENSG00000160469|ENSG00000099326|ENSG00000131845|ENSG00000131848|ENSG00000131849|ENSG00000105132|ENSG00000198131|ENSG00000105136|ENSG00000083842|ENSG00000083844…	0.00890926
26-chr19-62500000-67500000	regulation of physiological process	ENSG00000176293|ENSG00000121406|ENSG00000121417|ENSG00000130726|ENSG00000121413|ENSG00000180532|ENSG00000166704|ENSG00000152454|ENSG00000099326|ENSG00000131845|ENSG00000131849|ENSG00000105132|ENSG00000198131|ENSG00000105136|ENSG00000083842|ENSG00000188785|ENSG00000083838|ENSG00000196724|ENSG00000184294|ENSG00000179909|ENSG00000171574|ENSG00000083817|ENSG00000083814|ENSG00000083812|ENSG00000198466…	9.90162e-14
26-chr19-62500000-67500000	regulation of cellular process	ENSG00000176293|ENSG00000121406|ENSG00000121417|ENSG00000130726|ENSG00000121413|ENSG00000180532|ENSG00000166704|ENSG00000152454|ENSG00000099326|ENSG00000131845|ENSG00000131849|ENSG00000105132|ENSG00000198131|ENSG00000105136|ENSG00000083842|ENSG00000188785|ENSG00000083838|ENSG00000196724|ENSG00000184294|ENSG00000179909|ENSG00000171574|ENSG00000083817|ENSG00000083814|ENSG00000083812|ENSG00000198466…	1.95696e-13
26-chr19-62500000-67500000	metabolism	ENSG00000176293|ENSG00000121406|ENSG00000121417|ENSG00000130725|ENSG00000130726|ENSG00000121413|ENSG00000180532|ENSG00000166704|ENSG00000152454|ENSG00000099326|ENSG00000131845|ENSG00000131849|ENSG00000105132|ENSG00000198131|ENSG00000105136|ENSG00000083842|ENSG00000083845|ENSG00000188785|ENSG00000083838|ENSG00000196724|ENSG00000184294|ENSG00000179909|ENSG00000171574|ENSG00000083817|ENSG00000083814…	0.000134964
14-chr22-32500000-37500000	localization	ENSG00000128309|ENSG00000166862|ENSG00000168135|ENSG00000100336|ENSG00000170420|ENSG00000100365|ENSG00000100226|ENSG00000128284|ENSG00000198125|ENSG00000100211|ENSG00000100216|ENSG00000100083|ENSG00000128311|ENSG00000128313|ENSG00000100281|ENSG00000100284|ENSG00000133466|ENSG00000100350|ENSG00000128335|ENSG00000100379|ENSG00000100156|ENSG00000100151|ENSG00000100348|ENSG00000100242|ENSG00000100342…	0.0145076
3-chrY-5000000-10000000	tissue development	ENSG00000099721|ENSG00000168692|ENSG00000185912|	0.0270679
9-chrY-20000000-25000000	sexual reproduction	ENSG00000012817|ENSG00000174622|ENSG00000183753|ENSG00000169800|ENSG00000131003|	0.000377564
10-chrY-22500000-27500000	sexual reproduction	ENSG00000185894|ENSG00000172288|ENSG00000187191|ENSG00000183795|ENSG00000183753|ENSG00000169800|ENSG00000131003|	1.17139e-07
11-chrY-25000000-30000000	sexual reproduction	ENSG00000185894|ENSG00000172288|ENSG00000187191|ENSG00000183795|	0.000443718
36-chr1-87500000-92500000	immune response	ENSG00000162654|ENSG00000162645|ENSG00000183347|ENSG00000117226|ENSG00000117228|ENSG00000154451|ENSG00000174842|	0.0438778
41-chr1-100000000-105000000	digestion	ENSG00000187733|ENSG00000174876|ENSG00000197839|ENSG00000051415|	0.00345255
42-chr1-102500000-107500000	digestion	ENSG00000187733|ENSG00000174876|ENSG00000197839|ENSG00000051415|	5.54214e-05
60-chr1-147500000-152500000	keratinocyte differentiation	ENSG00000163207|ENSG00000163216|ENSG00000196805|	0.0172946
60-chr1-147500000-152500000	ectoderm development	ENSG00000159455|ENSG00000198854|ENSG00000169474|ENSG00000163216|ENSG00000169469|ENSG00000143556|	0.011258
61-chr1-150000000-155000000	keratinocyte differentiation	ENSG00000163207|ENSG00000163216|ENSG00000196805|	0.0279741
61-chr1-150000000-155000000	ectoderm development	ENSG00000159455|ENSG00000198854|ENSG00000169474|ENSG00000163216|ENSG00000160685|ENSG00000169469|ENSG00000143556|ENSG00000143320|	0.000239994
63-chr1-155000000-160000000	response to other organism	ENSG00000132703|ENSG00000122223|ENSG00000122224|ENSG00000158473|ENSG00000158874|ENSG00000073754|ENSG00000158769|ENSG00000163563|ENSG00000163565|ENSG00000158481|ENSG00000158485|ENSG00000117090|ENSG00000132693|	0.0386753
63-chr1-155000000-160000000	immune response	ENSG00000132703|ENSG00000158869|ENSG00000122223|ENSG00000122224|ENSG00000158473|ENSG00000158477|ENSG00000026751|ENSG00000143226|ENSG00000158874|ENSG00000073754|ENSG00000162747|ENSG00000072694|ENSG00000158769|ENSG00000163563|ENSG00000158488|ENSG00000163565|ENSG00000163568|ENSG00000158481|ENSG00000158485|ENSG00000117090|ENSG00000179639|ENSG00000132693|	2.8209e-06
63-chr1-155000000-160000000	defense response	ENSG00000132703|ENSG00000158869|ENSG00000122223|ENSG00000122224|ENSG00000158473|ENSG00000158477|ENSG00000026751|ENSG00000143226|ENSG00000158874|ENSG00000073754|ENSG00000162747|ENSG00000072694|ENSG00000066294|ENSG00000158769|ENSG00000163563|ENSG00000158488|ENSG00000163565|ENSG00000163568|ENSG00000158481|ENSG00000158485|ENSG00000117091|ENSG00000117090|ENSG00000179639|ENSG00000132693|	9.55261e-07
64-chr1-157500000-162500000	immune response	ENSG00000132703|ENSG00000158869|ENSG00000122223|ENSG00000122224|ENSG00000026751|ENSG00000143226|ENSG00000158874|ENSG00000162747|ENSG00000072694|ENSG00000158769|ENSG00000117090|ENSG00000179639|ENSG00000132693|	0.0453497
64-chr1-157500000-162500000	defense response	ENSG00000132703|ENSG00000158869|ENSG00000122223|ENSG00000122224|ENSG00000026751|ENSG00000143226|ENSG00000158874|ENSG00000162747|ENSG00000072694|ENSG00000066294|ENSG00000158769|ENSG00000117091|ENSG00000117090|ENSG00000179639|ENSG00000132693|	0.01073
76-chr1-187500000-192500000	regulation of signal transduction	ENSG00000023572|ENSG00000116741|ENSG00000090104|ENSG00000127074|ENSG00000150681|	0.00044711
77-chr1-190000000-195000000	regulation of signal transduction	ENSG00000023572|ENSG00000116741|ENSG00000090104|ENSG00000127074|ENSG00000150681|	0.0013371
80-chr1-197500000-202500000	muscle contraction	ENSG00000077157|ENSG00000118194|ENSG00000133055|ENSG00000163395|ENSG00000081248|ENSG00000159173|	0.0199747
82-chr1-202500000-207500000	response to other organism	ENSG00000117335|ENSG00000123838|ENSG00000123843|ENSG00000162894|ENSG00000162891|ENSG00000196188|ENSG00000136634|ENSG00000196352|ENSG00000117322|	0.00906677
82-chr1-202500000-207500000	response to pest, pathogen or parasite	ENSG00000117335|ENSG00000123838|ENSG00000123843|ENSG00000162894|ENSG00000162891|ENSG00000196188|ENSG00000136634|ENSG00000196352|ENSG00000117322|	0.00582946
82-chr1-202500000-207500000	immune response	ENSG00000142224|ENSG00000117335|ENSG00000143466|ENSG00000123838|ENSG00000123843|ENSG00000162894|ENSG00000162891|ENSG00000162892|ENSG00000196188|ENSG00000136634|ENSG00000196352|ENSG00000117322|	0.000349486
82-chr1-202500000-207500000	defense response	ENSG00000142224|ENSG00000117335|ENSG00000143466|ENSG00000123838|ENSG00000123843|ENSG00000162894|ENSG00000162891|ENSG00000162892|ENSG00000196188|ENSG00000136634|ENSG00000196352|ENSG00000117322|	0.00112841
83-chr1-205000000-210000000	response to other organism	ENSG00000117335|ENSG00000123838|ENSG00000123843|ENSG00000162894|ENSG00000162891|ENSG00000136634|ENSG00000196352|ENSG00000117322|	0.0094953
83-chr1-205000000-210000000	response to pest, pathogen or parasite	ENSG00000117335|ENSG00000123838|ENSG00000123843|ENSG00000162894|ENSG00000162891|ENSG00000136634|ENSG00000196352|ENSG00000117322|	0.0063541
83-chr1-205000000-210000000	immune response	ENSG00000142224|ENSG00000117335|ENSG00000123838|ENSG00000123843|ENSG00000162894|ENSG00000162891|ENSG00000162892|ENSG00000136634|ENSG00000196352|ENSG00000117322|	0.00141519
83-chr1-205000000-210000000	defense response	ENSG00000142224|ENSG00000117335|ENSG00000123838|ENSG00000123843|ENSG00000162894|ENSG00000162891|ENSG00000162892|ENSG00000136634|ENSG00000196352|ENSG00000117322|	0.00396944
98-chr1-242500000-247500000	signal transduction	ENSG00000169214|ENSG00000177212|ENSG00000196936|ENSG00000177174|ENSG00000177489|ENSG00000198281|ENSG00000171180|ENSG00000182783|ENSG00000183130|ENSG00000184022|ENSG00000175143|ENSG00000198128|ENSG00000177275|ENSG00000162727|ENSG00000187701|ENSG00000177201|ENSG00000175180|ENSG00000177233|ENSG00000196772|ENSG00000197437|ENSG00000198452|ENSG00000197591|ENSG00000162711|ENSG00000177186|ENSG00000196944…	3.62999e-13
98-chr1-242500000-247500000	neurophysiological process	ENSG00000169214|ENSG00000177212|ENSG00000196936|ENSG00000177174|ENSG00000198281|ENSG00000171180|ENSG00000182783|ENSG00000183130|ENSG00000162727|ENSG00000187701|ENSG00000177201|ENSG00000177233|ENSG00000197437|ENSG00000198452|ENSG00000197591|ENSG00000162711|ENSG00000177186|ENSG00000196071|ENSG00000196079|ENSG00000196539|ENSG00000198601|ENSG00000183310|ENSG00000197454|ENSG00000153230|ENSG00000177151|	7.43844e-13
99-chr1-245000000-250000000	signal transduction	ENSG00000169214|ENSG00000177212|ENSG00000196936|ENSG00000177174|ENSG00000177489|ENSG00000198281|ENSG00000171180|ENSG00000182783|ENSG00000183130|ENSG00000184022|ENSG00000175143|ENSG00000198128|ENSG00000177275|ENSG00000162727|ENSG00000187701|ENSG00000177201|ENSG00000175180|ENSG00000177233|ENSG00000196772|ENSG00000197437|ENSG00000198452|ENSG00000197591|ENSG00000162711|ENSG00000177186|ENSG00000196944…	6.54839e-16
99-chr1-245000000-250000000	neurophysiological process	ENSG00000169214|ENSG00000177212|ENSG00000196936|ENSG00000177174|ENSG00000198281|ENSG00000171180|ENSG00000182783|ENSG00000183130|ENSG00000162727|ENSG00000187701|ENSG00000177201|ENSG00000177233|ENSG00000197437|ENSG00000198452|ENSG00000197591|ENSG00000162711|ENSG00000177186|ENSG00000196071|ENSG00000196079|ENSG00000196539|ENSG00000198601|ENSG00000183310|ENSG00000197454|ENSG00000153230|ENSG00000177151|	6.50104e-14
35-chr2-85000000-90000000	immune response	ENSG00000153563|ENSG00000163245|ENSG00000122156|ENSG00000172038|ENSG00000172116|ENSG00000173758|ENSG00000169769|ENSG00000173799|ENSG00000115523|ENSG00000153587|ENSG00000153586|ENSG00000173782|ENSG00000184817|	0.000130891
35-chr2-85000000-90000000	defense response	ENSG00000153563|ENSG00000163245|ENSG00000122156|ENSG00000172038|ENSG00000172116|ENSG00000173758|ENSG00000169769|ENSG00000173799|ENSG00000115523|ENSG00000153587|ENSG00000153586|ENSG00000173782|ENSG00000184817|	0.000501653
36-chr2-87500000-92500000	immune response	ENSG00000163245|ENSG00000122156|ENSG00000172038|ENSG00000173758|ENSG00000169769|ENSG00000173799|ENSG00000153587|ENSG00000153586|ENSG00000173782|ENSG00000184817|	1.53183e-05
36-chr2-87500000-92500000	defense response	ENSG00000163245|ENSG00000122156|ENSG00000172038|ENSG00000173758|ENSG00000169769|ENSG00000173799|ENSG00000153587|ENSG00000153586|ENSG00000173782|ENSG00000184817|	4.86988e-05
45-chr2-110000000-115000000	thermoregulation	ENSG00000125538|ENSG00000115008|	0.0184633
45-chr2-110000000-115000000	immune response	ENSG00000125538|ENSG00000136689|ENSG00000136688|ENSG00000136696|ENSG00000136697|ENSG00000136694|ENSG00000136695|ENSG00000125571|ENSG00000115008|	0.0145868
45-chr2-110000000-115000000	defense response	ENSG00000125538|ENSG00000136689|ENSG00000136688|ENSG00000136696|ENSG00000136697|ENSG00000136694|ENSG00000136695|ENSG00000125571|ENSG00000115008|	0.0346235
46-chr2-112500000-117500000	response to other organism	ENSG00000125538|ENSG00000136689|ENSG00000136688|ENSG00000136697|ENSG00000136694|ENSG00000136695|ENSG00000115008|	0.021494
46-chr2-112500000-117500000	thermoregulation	ENSG00000125538|ENSG00000115008|	0.012725
46-chr2-112500000-117500000	response to pest, pathogen or parasite	ENSG00000125538|ENSG00000136689|ENSG00000136688|ENSG00000136697|ENSG00000136694|ENSG00000136695|ENSG00000115008|	0.0150457
46-chr2-112500000-117500000	immune response	ENSG00000125538|ENSG00000136689|ENSG00000136688|ENSG00000136696|ENSG00000136697|ENSG00000136694|ENSG00000136695|ENSG00000125571|ENSG00000115008|	0.00227331
46-chr2-112500000-117500000	defense response	ENSG00000125538|ENSG00000136689|ENSG00000136688|ENSG00000136696|ENSG00000136697|ENSG00000136694|ENSG00000136695|ENSG00000125571|ENSG00000115008|	0.00563125
46-chr2-112500000-117500000	response to wounding	ENSG00000125538|ENSG00000136689|ENSG00000136697|ENSG00000136694|ENSG00000136695|ENSG00000115008|	0.0267967
52-chr2-127500000-132500000	determination of symmetry	ENSG00000136698|ENSG00000152093|	0.0412484
53-chr2-130000000-135000000	determination of symmetry	ENSG00000136698|ENSG00000152093|	0.0211998
13-chr3-30000000-35000000	taxis	ENSG00000153551|ENSG00000183813|ENSG00000170293|ENSG00000091317|	0.0128065
13-chr3-30000000-35000000	locomotory behavior	ENSG00000153551|ENSG00000183813|ENSG00000170293|ENSG00000091317|	0.0146081
18-chr3-42500000-47500000	taxis	ENSG00000163823|ENSG00000121807|ENSG00000144648|ENSG00000183625|ENSG00000173585|ENSG00000173578|	0.00517632
18-chr3-42500000-47500000	ion homeostasis	ENSG00000163823|ENSG00000121807|ENSG00000183625|ENSG00000012223|ENSG00000173585|ENSG00000173578|	0.00735473
18-chr3-42500000-47500000	cell homeostasis	ENSG00000163823|ENSG00000121807|ENSG00000183625|ENSG00000012223|ENSG00000173585|ENSG00000173578|	0.0106887
18-chr3-42500000-47500000	locomotory behavior	ENSG00000163823|ENSG00000121807|ENSG00000144648|ENSG00000183625|ENSG00000173585|ENSG00000173578|	0.0063224
31-chr3-75000000-80000000	positive regulation of development	ENSG00000185008|ENSG00000169855|	0.0294121
31-chr3-75000000-80000000	regulation of neurogenesis	ENSG00000185008|ENSG00000169855|	0.0106265
59-chr3-145000000-150000000	regulation of body fluids	ENSG00000188313|ENSG00000114698|ENSG00000144891|	0.0262962
28-chr4-67500000-72500000	bone remodeling	ENSG00000126549|ENSG00000132464|ENSG00000126550|ENSG00000178522|	0.00441907
28-chr4-67500000-72500000	biomineral formation	ENSG00000126549|ENSG00000132464|ENSG00000126550|ENSG00000178522|	0.00371199
29-chr4-70000000-75000000	bone remodeling	ENSG00000126549|ENSG00000132464|ENSG00000126550|ENSG00000178522|	0.00346975
29-chr4-70000000-75000000	response to chemical stimulus	ENSG00000135226|ENSG00000163739|ENSG00000124875|ENSG00000126550|ENSG00000156096|ENSG00000169429|ENSG00000173610|	0.0111087
29-chr4-70000000-75000000	biomineral formation	ENSG00000126549|ENSG00000132464|ENSG00000126550|ENSG00000178522|	0.00287766
30-chr4-72500000-77500000	taxis	ENSG00000138755|ENSG00000163739|ENSG00000163737|ENSG00000163736|ENSG00000163735|ENSG00000163734|ENSG00000124875|ENSG00000081041|ENSG00000169245|ENSG00000169248|ENSG00000169429|	8.5813e-11
30-chr4-72500000-77500000	response to other organism	ENSG00000138755|ENSG00000163739|ENSG00000163737|ENSG00000163736|ENSG00000163735|ENSG00000163734|ENSG00000124875|ENSG00000081041|ENSG00000169245|ENSG00000169248|ENSG00000169429|	0.000278589
30-chr4-72500000-77500000	response to pest, pathogen or parasite	ENSG00000138755|ENSG00000163739|ENSG00000163737|ENSG00000163735|ENSG00000163734|ENSG00000124875|ENSG00000081041|ENSG00000169245|ENSG00000169248|ENSG00000169429|	0.00130514
30-chr4-72500000-77500000	immune response	ENSG00000138755|ENSG00000163739|ENSG00000163737|ENSG00000163736|ENSG00000163735|ENSG00000163734|ENSG00000124875|ENSG00000081041|ENSG00000169245|ENSG00000169248|ENSG00000109272|ENSG00000169429|ENSG00000081051|	9.15152e-05
30-chr4-72500000-77500000	defense response	ENSG00000138755|ENSG00000163739|ENSG00000163737|ENSG00000163736|ENSG00000163735|ENSG00000163734|ENSG00000124875|ENSG00000081041|ENSG00000169245|ENSG00000169248|ENSG00000109272|ENSG00000169429|ENSG00000081051|	0.000353916
30-chr4-72500000-77500000	response to chemical stimulus	ENSG00000138755|ENSG00000163739|ENSG00000163737|ENSG00000163736|ENSG00000163735|ENSG00000163734|ENSG00000124875|ENSG00000081041|ENSG00000169245|ENSG00000169248|ENSG00000169429|	3.41307e-06
30-chr4-72500000-77500000	response to wounding	ENSG00000138755|ENSG00000163739|ENSG00000163737|ENSG00000163735|ENSG00000163734|ENSG00000124875|ENSG00000081041|ENSG00000169245|ENSG00000169248|ENSG00000169429|	9.01534e-05
30-chr4-72500000-77500000	locomotory behavior	ENSG00000138755|ENSG00000163739|ENSG00000163737|ENSG00000163736|ENSG00000163735|ENSG00000163734|ENSG00000124875|ENSG00000081041|ENSG00000169245|ENSG00000169248|ENSG00000169429|	1.33415e-10
31-chr4-75000000-80000000	taxis	ENSG00000138755|ENSG00000163737|ENSG00000163736|ENSG00000163735|ENSG00000163734|ENSG00000081041|ENSG00000169245|ENSG00000169248|ENSG00000156234|	2.67581e-08
31-chr4-75000000-80000000	response to other organism	ENSG00000138755|ENSG00000163737|ENSG00000163736|ENSG00000163735|ENSG00000163734|ENSG00000081041|ENSG00000169245|ENSG00000169248|ENSG00000156234|	0.00398373
31-chr4-75000000-80000000	response to pest, pathogen or parasite	ENSG00000138755|ENSG00000163737|ENSG00000163735|ENSG00000163734|ENSG00000081041|ENSG00000169245|ENSG00000169248|ENSG00000156234|	0.0184614
31-chr4-75000000-80000000	immune response	ENSG00000138755|ENSG00000163737|ENSG00000163736|ENSG00000163735|ENSG00000163734|ENSG00000081041|ENSG00000169245|ENSG00000169248|ENSG00000156234|	0.0356756
31-chr4-75000000-80000000	response to chemical stimulus	ENSG00000138755|ENSG00000163737|ENSG00000163736|ENSG00000163735|ENSG00000163734|ENSG00000081041|ENSG00000169245|ENSG00000169248|ENSG00000156234|	0.000130331
31-chr4-75000000-80000000	response to wounding	ENSG00000138755|ENSG00000163737|ENSG00000163735|ENSG00000163734|ENSG00000081041|ENSG00000169245|ENSG00000169248|ENSG00000156234|	0.00246591
31-chr4-75000000-80000000	locomotory behavior	ENSG00000138755|ENSG00000163737|ENSG00000163736|ENSG00000163735|ENSG00000163734|ENSG00000081041|ENSG00000169245|ENSG00000169248|ENSG00000156234|	3.84012e-08
35-chr4-85000000-90000000	bone remodeling	ENSG00000152592|ENSG00000152591|ENSG00000029559|ENSG00000118785|	0.000947375
35-chr4-85000000-90000000	biomineral formation	ENSG00000152592|ENSG00000152591|ENSG00000029559|ENSG00000118785|	0.000794132
35-chr4-85000000-90000000	skeletal development	ENSG00000152592|ENSG00000152591|ENSG00000029559|ENSG00000152595|ENSG00000118785|	0.00243931
36-chr4-87500000-92500000	bone remodeling	ENSG00000152592|ENSG00000152591|ENSG00000029559|ENSG00000118785|	0.00112822
36-chr4-87500000-92500000	biomineral formation	ENSG00000152592|ENSG00000152591|ENSG00000029559|ENSG00000118785|	0.000947375
36-chr4-87500000-92500000	skeletal development	ENSG00000152592|ENSG00000152591|ENSG00000029559|ENSG00000152595|ENSG00000118785|	0.00310779
62-chr4-152500000-157500000	circulation	ENSG00000171557|ENSG00000061918|ENSG00000164116|ENSG00000171560|ENSG00000171564|	0.00144486
63-chr4-155000000-160000000	circulation	ENSG00000171557|ENSG00000061918|ENSG00000164116|ENSG00000171560|ENSG00000171564|	0.000909975
16-chr5-37500000-42500000	cell death	ENSG00000113600|ENSG00000039537|ENSG00000168621|ENSG00000132357|ENSG00000132356|ENSG00000112936|	0.0323851
56-chr5-137500000-142500000	cell-cell signaling	ENSG00000197479|ENSG00000196963|ENSG00000156453|ENSG00000113205|ENSG00000113209|ENSG00000113141|ENSG00000081818|ENSG00000112852|ENSG00000113211|ENSG00000187372|ENSG00000113578|ENSG00000120324|ENSG00000120327|ENSG00000158458|	0.000354948
56-chr5-137500000-142500000	nervous system development	ENSG00000197479|ENSG00000196963|ENSG00000081842|ENSG00000156453|ENSG00000113205|ENSG00000113209|ENSG00000081818|ENSG00000145819|ENSG00000112852|ENSG00000113211|ENSG00000187372|ENSG00000120328|ENSG00000120324|ENSG00000120327|ENSG00000146013|ENSG00000113248|	4.82692e-07
56-chr5-137500000-142500000	cell-cell adhesion	ENSG00000197479|ENSG00000113555|ENSG00000081853|ENSG00000196963|ENSG00000081842|ENSG00000156453|ENSG00000113205|ENSG00000113209|ENSG00000081818|ENSG00000112852|ENSG00000146001|ENSG00000113212|ENSG00000113211|ENSG00000187372|ENSG00000120328|ENSG00000171815|ENSG00000120322|ENSG00000120324|ENSG00000120327|ENSG00000113248|	2.13941e-18
56-chr5-137500000-142500000	extracellular matrix organization and biogenesis	ENSG00000197479|ENSG00000196963|ENSG00000113205|ENSG00000113209|ENSG00000081818|ENSG00000112852|ENSG00000113211|ENSG00000187372|ENSG00000120324|ENSG00000120327|	1.38497e-11
57-chr5-140000000-145000000	cell-cell signaling	ENSG00000197479|ENSG00000196963|ENSG00000156453|ENSG00000113205|ENSG00000113209|ENSG00000081818|ENSG00000112852|ENSG00000113211|ENSG00000187372|ENSG00000113578|ENSG00000120324|ENSG00000120327|	6.6418e-05
57-chr5-140000000-145000000	nervous system development	ENSG00000197479|ENSG00000196963|ENSG00000081842|ENSG00000156453|ENSG00000113205|ENSG00000113209|ENSG00000081818|ENSG00000145819|ENSG00000112852|ENSG00000113211|ENSG00000187372|ENSG00000120328|ENSG00000120324|ENSG00000120327|ENSG00000113248|	2.79283e-09
57-chr5-140000000-145000000	cell-cell adhesion	ENSG00000197479|ENSG00000113555|ENSG00000081853|ENSG00000196963|ENSG00000081842|ENSG00000156453|ENSG00000113205|ENSG00000113209|ENSG00000081818|ENSG00000112852|ENSG00000146001|ENSG00000113212|ENSG00000113211|ENSG00000187372|ENSG00000120328|ENSG00000171815|ENSG00000120322|ENSG00000120324|ENSG00000120327|ENSG00000113248|	1.65653e-23
57-chr5-140000000-145000000	extracellular matrix organization and biogenesis	ENSG00000197479|ENSG00000196963|ENSG00000113205|ENSG00000113209|ENSG00000081818|ENSG00000112852|ENSG00000113211|ENSG00000187372|ENSG00000120324|ENSG00000120327|	9.97416e-14
57-chr5-140000000-145000000	neurophysiological process	ENSG00000197479|ENSG00000196963|ENSG00000113205|ENSG00000113209|ENSG00000081818|ENSG00000112852|ENSG00000113211|ENSG00000187372|ENSG00000120324|ENSG00000120327|ENSG00000131504|	0.0287298
10-chr6-22500000-27500000	cellular metabolism	ENSG00000196787|ENSG00000187475|ENSG00000010704|ENSG00000124564|ENSG00000180573|ENSG00000137259|ENSG00000188987|ENSG00000196176|ENSG00000124532|ENSG00000164508|ENSG00000196966|ENSG00000168242|ENSG00000198518|ENSG00000178458|ENSG00000196226|ENSG00000112343|ENSG00000124610|ENSG00000184825|ENSG00000112727|ENSG00000158403|ENSG00000197697|ENSG00000124578|ENSG00000158406|ENSG00000124575|ENSG00000168298…	0.0465273
10-chr6-22500000-27500000	primary metabolism	ENSG00000196787|ENSG00000187475|ENSG00000010704|ENSG00000180573|ENSG00000137259|ENSG00000188987|ENSG00000196176|ENSG00000124532|ENSG00000164508|ENSG00000196966|ENSG00000168242|ENSG00000198518|ENSG00000178458|ENSG00000196226|ENSG00000112343|ENSG00000124610|ENSG00000184825|ENSG00000112727|ENSG00000158403|ENSG00000197697|ENSG00000124578|ENSG00000158406|ENSG00000124575|ENSG00000168298|ENSG00000112312…	0.013064
10-chr6-22500000-27500000	cell organization and biogenesis	ENSG00000196787|ENSG00000187475|ENSG00000180573|ENSG00000137259|ENSG00000188987|ENSG00000196176|ENSG00000164508|ENSG00000196966|ENSG00000168242|ENSG00000198518|ENSG00000178458|ENSG00000196226|ENSG00000124610|ENSG00000184825|ENSG00000112727|ENSG00000158403|ENSG00000197697|ENSG00000124578|ENSG00000158406|ENSG00000124575|ENSG00000168298|ENSG00000198339|ENSG00000158373|ENSG00000146047|ENSG00000198327…	9.06331e-18
10-chr6-22500000-27500000	macromolecule metabolism	ENSG00000196787|ENSG00000187475|ENSG00000010704|ENSG00000180573|ENSG00000137259|ENSG00000188987|ENSG00000196176|ENSG00000164508|ENSG00000196966|ENSG00000168242|ENSG00000198518|ENSG00000178458|ENSG00000196226|ENSG00000112343|ENSG00000124610|ENSG00000184825|ENSG00000112727|ENSG00000158403|ENSG00000197697|ENSG00000124578|ENSG00000158406|ENSG00000124575|ENSG00000168298|ENSG00000112312|ENSG00000198339…	2.72483e-06
11-chr6-25000000-30000000	cellular metabolism	ENSG00000196787|ENSG00000187475|ENSG00000010704|ENSG00000197202|ENSG00000124564|ENSG00000197153|ENSG00000187626|ENSG00000180573|ENSG00000137259|ENSG00000196866|ENSG00000188987|ENSG00000196747|ENSG00000196176|ENSG00000164508|ENSG00000196374|ENSG00000196966|ENSG00000168242|ENSG00000198518|ENSG00000178458|ENSG00000197657|ENSG00000182572|ENSG00000158691|ENSG00000196501|ENSG00000196226|ENSG00000182611…	3.3458e-06
11-chr6-25000000-30000000	primary metabolism	ENSG00000196787|ENSG00000187475|ENSG00000010704|ENSG00000197202|ENSG00000197153|ENSG00000187626|ENSG00000180573|ENSG00000137259|ENSG00000196866|ENSG00000188987|ENSG00000196747|ENSG00000196176|ENSG00000164508|ENSG00000196374|ENSG00000196966|ENSG00000168242|ENSG00000198518|ENSG00000178458|ENSG00000197657|ENSG00000182572|ENSG00000158691|ENSG00000196501|ENSG00000196226|ENSG00000182611|ENSG00000112343…	1.5762e-06
11-chr6-25000000-30000000	cell organization and biogenesis	ENSG00000196787|ENSG00000187475|ENSG00000197153|ENSG00000180573|ENSG00000137259|ENSG00000196866|ENSG00000188987|ENSG00000196747|ENSG00000196176|ENSG00000164508|ENSG00000196374|ENSG00000196966|ENSG00000168242|ENSG00000198518|ENSG00000178458|ENSG00000182572|ENSG00000196501|ENSG00000196226|ENSG00000182611|ENSG00000124610|ENSG00000184825|ENSG00000112727|ENSG00000158403|ENSG00000197697|ENSG00000124578…	9.52481e-24
11-chr6-25000000-30000000	macromolecule metabolism	ENSG00000196787|ENSG00000187475|ENSG00000010704|ENSG00000197202|ENSG00000197153|ENSG00000180573|ENSG00000137259|ENSG00000196866|ENSG00000188987|ENSG00000196747|ENSG00000196176|ENSG00000164508|ENSG00000196374|ENSG00000196966|ENSG00000168242|ENSG00000198518|ENSG00000178458|ENSG00000182572|ENSG00000196501|ENSG00000196226|ENSG00000182611|ENSG00000112343|ENSG00000124610|ENSG00000184825|ENSG00000112727…	9.9192e-07
13-chr6-30000000-35000000	immune response	ENSG00000179344|ENSG00000168384|ENSG00000168383|ENSG00000196301|ENSG00000168394|ENSG00000196735|ENSG00000172899|ENSG00000168379|ENSG00000198502|ENSG00000196126|ENSG00000112493|	0.0161291
13-chr6-30000000-35000000	defense response	ENSG00000179344|ENSG00000168384|ENSG00000168383|ENSG00000196301|ENSG00000168394|ENSG00000196735|ENSG00000172899|ENSG00000168379|ENSG00000198502|ENSG00000196126|ENSG00000198559|ENSG00000112493|	0.00978499
11-chr7-25000000-30000000	regulation of metabolism	ENSG00000105991|ENSG00000105997|ENSG00000105996|ENSG00000122565|ENSG00000197576|ENSG00000153807|ENSG00000106004|ENSG00000106006|ENSG00000122592|ENSG00000146592|ENSG00000005073|ENSG00000050344|ENSG00000106031|ENSG00000106038|ENSG00000153814|ENSG00000078399|	0.00109831
11-chr7-25000000-30000000	regulation of cellular physiological process	ENSG00000105991|ENSG00000105997|ENSG00000105996|ENSG00000122565|ENSG00000197576|ENSG00000153807|ENSG00000106004|ENSG00000106006|ENSG00000172115|ENSG00000122592|ENSG00000146592|ENSG00000005073|ENSG00000050344|ENSG00000106031|ENSG00000106038|ENSG00000153814|ENSG00000078399|	0.00694622
38-chr7-92500000-97500000	skeletal development	ENSG00000006377|ENSG00000004948|ENSG00000105880|ENSG00000164692|	0.0381775
2-chr8-2500000-7500000	response to other organism	ENSG00000177023|ENSG00000177243|ENSG00000198129|ENSG00000185918|ENSG00000164825|ENSG00000164822|ENSG00000164821|ENSG00000186599|ENSG00000177257|ENSG00000164816|ENSG00000187082|	7.35678e-08
2-chr8-2500000-7500000	response to pest, pathogen or parasite	ENSG00000177243|ENSG00000185918|ENSG00000164825|ENSG00000164822|ENSG00000164821|ENSG00000186599|ENSG00000177257|ENSG00000164816|	0.000414842
2-chr8-2500000-7500000	defense response	ENSG00000177023|ENSG00000177243|ENSG00000198129|ENSG00000185918|ENSG00000164825|ENSG00000164822|ENSG00000164821|ENSG00000186599|ENSG00000177257|ENSG00000164816|ENSG00000187082|	5.90702e-06
3-chr8-5000000-10000000	response to other organism	ENSG00000178287|ENSG00000177023|ENSG00000186579|ENSG00000186572|ENSG00000176782|ENSG00000177243|ENSG00000198129|ENSG00000185918|ENSG00000164825|ENSG00000164822|ENSG00000164821|ENSG00000176797|ENSG00000186562|ENSG00000171711|ENSG00000186599|ENSG00000177257|ENSG00000164816|ENSG00000187082|	5.5995e-13
3-chr8-5000000-10000000	response to pest, pathogen or parasite	ENSG00000178287|ENSG00000177243|ENSG00000185918|ENSG00000164825|ENSG00000164822|ENSG00000164821|ENSG00000176797|ENSG00000186562|ENSG00000171711|ENSG00000186599|ENSG00000177257|ENSG00000164816|	6.73682e-06
3-chr8-5000000-10000000	defense response	ENSG00000178287|ENSG00000177023|ENSG00000186579|ENSG00000186572|ENSG00000176782|ENSG00000177243|ENSG00000198129|ENSG00000185918|ENSG00000164825|ENSG00000164822|ENSG00000164821|ENSG00000176797|ENSG00000186562|ENSG00000171711|ENSG00000186599|ENSG00000177257|ENSG00000164816|ENSG00000187082|	8.71928e-10
3-chr8-5000000-10000000	response to chemical stimulus	ENSG00000185918|ENSG00000164822|ENSG00000164821|ENSG00000171711|ENSG00000175806|ENSG00000177257|ENSG00000164816|	0.0260581
10-chr8-22500000-27500000	cell death	ENSG00000120907|ENSG00000120899|ENSG00000104228|ENSG00000173530|ENSG00000173535|ENSG00000120889|ENSG00000104689|ENSG00000104765|	0.0124872
2-chr9-2500000-7500000	pregnancy	ENSG00000120211|ENSG00000107014|ENSG00000107018|	0.0489005
3-chr9-5000000-10000000	pregnancy	ENSG00000120211|ENSG00000107014|ENSG00000107018|	0.0162145
3-chr9-5000000-10000000	reproductive organismal physiological process	ENSG00000120211|ENSG00000107014|ENSG00000107018|	0.0318886
8-chr9-17500000-22500000	response to other organism	ENSG00000186809|ENSG00000120247|ENSG00000186803|ENSG00000120242|ENSG00000184995|ENSG00000137026|ENSG00000137080|ENSG00000171855|ENSG00000120235|ENSG00000188379|ENSG00000147885|ENSG00000147877|ENSG00000177047|ENSG00000147873|	4.79908e-10
8-chr9-17500000-22500000	response to pest, pathogen or parasite	ENSG00000186809|ENSG00000120247|ENSG00000186803|ENSG00000120242|ENSG00000184995|ENSG00000137026|ENSG00000137080|ENSG00000171855|ENSG00000120235|ENSG00000188379|ENSG00000147885|ENSG00000147877|ENSG00000177047|ENSG00000147873|	2.13669e-10
8-chr9-17500000-22500000	defense response	ENSG00000186809|ENSG00000120247|ENSG00000186803|ENSG00000120242|ENSG00000184995|ENSG00000137026|ENSG00000137080|ENSG00000171855|ENSG00000120235|ENSG00000188379|ENSG00000147885|ENSG00000147877|ENSG00000177047|ENSG00000147873|	1.54028e-07
9-chr9-20000000-25000000	response to other organism	ENSG00000186809|ENSG00000120247|ENSG00000186803|ENSG00000120242|ENSG00000184995|ENSG00000137026|ENSG00000137080|ENSG00000171855|ENSG00000120235|ENSG00000188379|ENSG00000147885|ENSG00000147877|ENSG00000177047|ENSG00000147873|	3.26962e-11
9-chr9-20000000-25000000	response to pest, pathogen or parasite	ENSG00000186809|ENSG00000120247|ENSG00000186803|ENSG00000120242|ENSG00000184995|ENSG00000137026|ENSG00000137080|ENSG00000171855|ENSG00000120235|ENSG00000188379|ENSG00000147885|ENSG00000147877|ENSG00000177047|ENSG00000147873|	1.41099e-11
9-chr9-20000000-25000000	defense response	ENSG00000186809|ENSG00000120247|ENSG00000186803|ENSG00000120242|ENSG00000184995|ENSG00000137026|ENSG00000137080|ENSG00000171855|ENSG00000120235|ENSG00000188379|ENSG00000147885|ENSG00000147877|ENSG00000177047|ENSG00000147873|	1.07768e-08
14-chr9-32500000-37500000	excretion	ENSG00000137106|ENSG00000165272|ENSG00000198722|ENSG00000165269|	0.0421406
49-chr9-120000000-125000000	neurophysiological process	ENSG00000136939|ENSG00000171496|ENSG00000171505|ENSG00000119396|ENSG00000197233|ENSG00000136940|ENSG00000171481|ENSG00000165202|ENSG00000165204|ENSG00000136834|	0.0380499
55-chr9-135000000-140000000	transport	ENSG00000196642|ENSG00000122133|ENSG00000122136|ENSG00000188566|ENSG00000148408|ENSG00000160349|ENSG00000160339|ENSG00000198569|ENSG00000123453|ENSG00000176919|ENSG00000107331|ENSG00000148386|ENSG00000184925|ENSG00000165661|ENSG00000160326|ENSG00000177984|ENSG00000169583|ENSG00000176884|ENSG00000130635|ENSG00000085265|ENSG00000187609|ENSG00000171102|ENSG00000107147|ENSG00000148290|ENSG00000188229…	0.0401733
32-chr10-77500000-82500000	regulation of liquid surface tension	ENSG00000122854|ENSG00000122852|ENSG00000185303|ENSG00000182314|ENSG00000133661|	2.10062e-10
32-chr10-77500000-82500000	respiratory gaseous exchange	ENSG00000122854|ENSG00000122852|ENSG00000185303|ENSG00000182314|ENSG00000133661|	2.1266e-07
33-chr10-80000000-85000000	regulation of liquid surface tension	ENSG00000122854|ENSG00000122852|ENSG00000185303|ENSG00000182314|ENSG00000133661|	5.38849e-11
33-chr10-80000000-85000000	respiratory gaseous exchange	ENSG00000122854|ENSG00000122852|ENSG00000185303|ENSG00000182314|ENSG00000133661|	5.51286e-08
2-chr11-2500000-7500000	signal transduction	ENSG00000184698|ENSG00000176893|ENSG00000176895|ENSG00000167355|ENSG00000170782|ENSG00000167359|ENSG00000175609|ENSG00000181009|ENSG00000183251|ENSG00000176787|ENSG00000181001|ENSG00000181609|ENSG00000187918|ENSG00000176900|ENSG00000180909|ENSG00000176904|ENSG00000176937|ENSG00000188069|ENSG00000180913|ENSG00000180919|ENSG00000197790|ENSG00000181616|ENSG00000176748|ENSG00000182170|ENSG00000176239…	1.71532e-15
2-chr11-2500000-7500000	neurophysiological process	ENSG00000184698|ENSG00000176893|ENSG00000176895|ENSG00000167355|ENSG00000167359|ENSG00000175609|ENSG00000181009|ENSG00000183251|ENSG00000176787|ENSG00000181001|ENSG00000181609|ENSG00000187918|ENSG00000176904|ENSG00000180919|ENSG00000176748|ENSG00000176239|ENSG00000176742|ENSG00000197428|ENSG00000180947|ENSG00000184478|ENSG00000170803|ENSG00000170790|ENSG00000110148|ENSG00000176798|ENSG00000180988…	9.72085e-17
3-chr11-5000000-10000000	signal transduction	ENSG00000184698|ENSG00000167355|ENSG00000170782|ENSG00000167359|ENSG00000181009|ENSG00000183251|ENSG00000176787|ENSG00000181001|ENSG00000181609|ENSG00000187918|ENSG00000180909|ENSG00000180913|ENSG00000180919|ENSG00000181616|ENSG00000176748|ENSG00000176239|ENSG00000176742|ENSG00000176716|ENSG00000166333|ENSG00000180947|ENSG00000184478|ENSG00000170803|ENSG00000188124|ENSG00000170790|ENSG00000110148…	3.73028e-10
3-chr11-5000000-10000000	neurophysiological process	ENSG00000184698|ENSG00000167355|ENSG00000167359|ENSG00000181009|ENSG00000183251|ENSG00000176787|ENSG00000181001|ENSG00000181609|ENSG00000187918|ENSG00000180919|ENSG00000176748|ENSG00000176239|ENSG00000176742|ENSG00000180947|ENSG00000184478|ENSG00000170803|ENSG00000170790|ENSG00000110148|ENSG00000175393|ENSG00000180988|ENSG00000184321|ENSG00000166368|ENSG00000183269|ENSG00000180974|ENSG00000183303…	1.82108e-13
22-chr11-52500000-57500000	signal transduction	ENSG00000149133|ENSG00000172459|ENSG00000172457|ENSG00000181903|ENSG00000172199|ENSG00000172489|ENSG00000172487|ENSG00000172188|ENSG00000184741|ENSG00000181296|ENSG00000186124|ENSG00000174914|ENSG00000174970|ENSG00000197468|ENSG00000181761|ENSG00000188439|ENSG00000181273|ENSG00000109991|ENSG00000181767|ENSG00000187612|ENSG00000181780|ENSG00000134817|ENSG00000181718|ENSG00000181785|ENSG00000174957…	1.49926e-19
22-chr11-52500000-57500000	neurophysiological process	ENSG00000149133|ENSG00000172459|ENSG00000181903|ENSG00000156575|ENSG00000172487|ENSG00000174914|ENSG00000174970|ENSG00000181761|ENSG00000181273|ENSG00000181767|ENSG00000181785|ENSG00000174957|ENSG00000181961|ENSG00000181371|ENSG00000174942|ENSG00000186117|ENSG00000172464|ENSG00000181693|ENSG00000186113|ENSG00000181282|ENSG00000181698|ENSG00000172154|ENSG00000186119|ENSG00000181935|ENSG00000198877…	7.75295e-17
23-chr11-55000000-60000000	signal transduction	ENSG00000166928|ENSG00000149516|ENSG00000166927|ENSG00000166926|ENSG00000149133|ENSG00000172459|ENSG00000172457|ENSG00000172289|ENSG00000172381|ENSG00000181903|ENSG00000172199|ENSG00000172489|ENSG00000172487|ENSG00000166884|ENSG00000198283|ENSG00000172188|ENSG00000184741|ENSG00000181296|ENSG00000172365|ENSG00000172362|ENSG00000186124|ENSG00000174914|ENSG00000174970|ENSG00000172320|ENSG00000172769…	2.57638e-30
23-chr11-55000000-60000000	neurophysiological process	ENSG00000149133|ENSG00000172459|ENSG00000172289|ENSG00000172381|ENSG00000181903|ENSG00000156575|ENSG00000172487|ENSG00000166884|ENSG00000172365|ENSG00000172362|ENSG00000174914|ENSG00000174970|ENSG00000172320|ENSG00000172769|ENSG00000172324|ENSG00000181761|ENSG00000181273|ENSG00000181767|ENSG00000181785|ENSG00000174957|ENSG00000176495|ENSG00000181371|ENSG00000174942|ENSG00000186117|ENSG00000172464…	9.52481e-24
24-chr11-57500000-62500000	signal transduction	ENSG00000166928|ENSG00000149516|ENSG00000166927|ENSG00000166926|ENSG00000162188|ENSG00000172289|ENSG00000172381|ENSG00000166884|ENSG00000198283|ENSG00000168539|ENSG00000183134|ENSG00000172365|ENSG00000172362|ENSG00000149021|ENSG00000172689|ENSG00000172320|ENSG00000172769|ENSG00000071203|ENSG00000172324|ENSG00000166930|ENSG00000110031|ENSG00000172742|ENSG00000186513|ENSG00000166961|ENSG00000176495…	0.000449445
24-chr11-57500000-62500000	neurophysiological process	ENSG00000172289|ENSG00000172381|ENSG00000166884|ENSG00000172365|ENSG00000172362|ENSG00000172320|ENSG00000172769|ENSG00000172324|ENSG00000167995|ENSG00000176495|ENSG00000172377|ENSG00000172772|ENSG00000186509|ENSG00000176200|ENSG00000176205|ENSG00000180475|ENSG00000186660|ENSG00000149489|	0.013385
40-chr11-97500000-102500000	catabolism	ENSG00000149968|ENSG00000196611|ENSG00000166670|ENSG00000137745|ENSG00000137673|ENSG00000118113|	0.0146081
42-chr11-102500000-107500000	cell death	ENSG00000110675|ENSG00000118168|ENSG00000196954|ENSG00000137757|ENSG00000137752|ENSG00000166266|	0.00601546
49-chr11-120000000-125000000	signal transduction	ENSG00000197309|ENSG00000181518|ENSG00000198674|ENSG00000149403|ENSG00000181214|ENSG00000171014|ENSG00000182634|ENSG00000186268|ENSG00000198657|ENSG00000197263|ENSG00000196119|ENSG00000197125|ENSG00000170953|ENSG00000154146|ENSG00000196341|ENSG00000185932|ENSG00000196403|ENSG00000196703|ENSG00000181457|ENSG00000196099|ENSG00000197849|ENSG00000064199|ENSG00000181499|ENSG00000196661|ENSG00000173365…	0.0010083
49-chr11-120000000-125000000	neurophysiological process	ENSG00000181518|ENSG00000149403|ENSG00000154134|ENSG00000171014|ENSG00000182634|ENSG00000109927|ENSG00000186268|ENSG00000198657|ENSG00000197263|ENSG00000197125|ENSG00000170953|ENSG00000196341|ENSG00000196703|ENSG00000181457|ENSG00000196099|ENSG00000197849|ENSG00000181499|ENSG00000196661|ENSG00000173365|	5.55999e-08
50-chr11-122500000-127500000	signal transduction	ENSG00000197309|ENSG00000181518|ENSG00000198674|ENSG00000181214|ENSG00000171014|ENSG00000182634|ENSG00000186268|ENSG00000198657|ENSG00000197263|ENSG00000196119|ENSG00000197125|ENSG00000170953|ENSG00000154146|ENSG00000196341|ENSG00000196403|ENSG00000196703|ENSG00000181457|ENSG00000196099|ENSG00000197849|ENSG00000064199|ENSG00000181499|ENSG00000196661|ENSG00000173365|ENSG00000196248|	0.0322972
50-chr11-122500000-127500000	neurophysiological process	ENSG00000181518|ENSG00000154134|ENSG00000171014|ENSG00000182634|ENSG00000186268|ENSG00000198657|ENSG00000197263|ENSG00000197125|ENSG00000170953|ENSG00000196341|ENSG00000196703|ENSG00000181457|ENSG00000196099|ENSG00000197849|ENSG00000181499|ENSG00000196661|ENSG00000173365|	8.52236e-06
52-chr11-127500000-132500000	neuron recognition	ENSG00000183715|ENSG00000182667|	0.0294121
53-chr11-130000000-135000000	neuron recognition	ENSG00000183715|ENSG00000182667|	0.00891745
3-chr12-5000000-10000000	response to other organism	ENSG00000171860|ENSG00000110852|ENSG00000166523|ENSG00000182326|ENSG00000139187|ENSG00000010610|ENSG00000139193|ENSG00000111729|ENSG00000111796|ENSG00000159335|ENSG00000150045|ENSG00000177575|ENSG00000069493|	0.00487645
3-chr12-5000000-10000000	response to pest, pathogen or parasite	ENSG00000171860|ENSG00000110852|ENSG00000166523|ENSG00000182326|ENSG00000139187|ENSG00000010610|ENSG00000139193|ENSG00000111729|ENSG00000111796|ENSG00000159335|ENSG00000150045|ENSG00000177575|ENSG00000069493|	0.00266665
3-chr12-5000000-10000000	immune response	ENSG00000198178|ENSG00000171860|ENSG00000110852|ENSG00000111321|ENSG00000166523|ENSG00000166527|ENSG00000182326|ENSG00000139187|ENSG00000010610|ENSG00000139193|ENSG00000111729|ENSG00000111796|ENSG00000159335|ENSG00000150045|ENSG00000177575|ENSG00000111732|ENSG00000069493|	0.000316552
3-chr12-5000000-10000000	defense response	ENSG00000198178|ENSG00000171860|ENSG00000089693|ENSG00000110852|ENSG00000111321|ENSG00000166523|ENSG00000166527|ENSG00000182326|ENSG00000139187|ENSG00000010610|ENSG00000139193|ENSG00000111729|ENSG00000110848|ENSG00000111796|ENSG00000159335|ENSG00000150045|ENSG00000177575|ENSG00000111732|ENSG00000069493|	6.75526e-05
4-chr12-7500000-12500000	response to other organism	ENSG00000134539|ENSG00000171860|ENSG00000183542|ENSG00000173391|ENSG00000110852|ENSG00000166523|ENSG00000139187|ENSG00000111729|ENSG00000111796|ENSG00000172243|ENSG00000021602|ENSG00000150045|ENSG00000177575|ENSG00000069493|ENSG00000134545|	2.08296e-05
4-chr12-7500000-12500000	response to pest, pathogen or parasite	ENSG00000134539|ENSG00000171860|ENSG00000183542|ENSG00000173391|ENSG00000110852|ENSG00000166523|ENSG00000139187|ENSG00000111729|ENSG00000111796|ENSG00000172243|ENSG00000021602|ENSG00000150045|ENSG00000177575|ENSG00000069493|ENSG00000134545|	9.30482e-06
4-chr12-7500000-12500000	immune response	ENSG00000134539|ENSG00000198178|ENSG00000171860|ENSG00000183542|ENSG00000173391|ENSG00000110852|ENSG00000166523|ENSG00000166527|ENSG00000139187|ENSG00000111729|ENSG00000111796|ENSG00000172243|ENSG00000021602|ENSG00000150045|ENSG00000177575|ENSG00000111732|ENSG00000069493|ENSG00000134545|	4.24669e-06
4-chr12-7500000-12500000	defense response	ENSG00000134539|ENSG00000198178|ENSG00000171860|ENSG00000183542|ENSG00000173391|ENSG00000110852|ENSG00000166523|ENSG00000166527|ENSG00000139187|ENSG00000111729|ENSG00000110848|ENSG00000165682|ENSG00000111796|ENSG00000172243|ENSG00000021602|ENSG00000150045|ENSG00000177575|ENSG00000111732|ENSG00000069493|ENSG00000134545|	6.79919e-07
5-chr12-10000000-15000000	signal transduction	ENSG00000173342|ENSG00000134539|ENSG00000121377|ENSG00000150086|ENSG00000183542|ENSG00000070019|ENSG00000070018|ENSG00000121318|ENSG00000196229|ENSG00000197837|ENSG00000121314|ENSG00000121381|ENSG00000183935|ENSG00000111266|ENSG00000111269|ENSG00000013588|ENSG00000165682|ENSG00000183150|ENSG00000186136|ENSG00000111348|ENSG00000172243|ENSG00000021602|ENSG00000111291|ENSG00000197870|ENSG00000134551…	0.0126202
20-chr12-47500000-52500000	ectoderm development	ENSG00000186081|ENSG00000135443|ENSG00000170465|ENSG00000185479|ENSG00000170523|ENSG00000172867|ENSG00000167768|	0.00107288
21-chr12-50000000-55000000	ectoderm development	ENSG00000186081|ENSG00000135443|ENSG00000170465|ENSG00000185479|ENSG00000170523|ENSG00000172867|ENSG00000167768|	0.00397569
7-chr14-15000000-20000000	signal transduction	ENSG00000176299|ENSG00000176294|ENSG00000176230|ENSG00000165762|ENSG00000176312|ENSG00000184394|ENSG00000176213|ENSG00000176219|ENSG00000176253|ENSG00000196832|ENSG00000186445|ENSG00000169484|ENSG00000169488|ENSG00000182652|ENSG00000176246|ENSG00000155249|ENSG00000176198|ENSG00000176281|ENSG00000196143|	0.000117143
7-chr14-15000000-20000000	neurophysiological process	ENSG00000176299|ENSG00000176294|ENSG00000165762|ENSG00000184394|ENSG00000176219|ENSG00000176253|ENSG00000169484|ENSG00000182652|ENSG00000176246|ENSG00000155249|ENSG00000176198|ENSG00000176281|	5.37385e-05
8-chr14-17500000-22500000	neurophysiological process	ENSG00000176299|ENSG00000176294|ENSG00000165762|ENSG00000172611|ENSG00000184394|ENSG00000092200|ENSG00000176219|ENSG00000176253|ENSG00000169208|ENSG00000169202|ENSG00000169484|ENSG00000169385|ENSG00000182652|ENSG00000176246|ENSG00000155249|ENSG00000176198|ENSG00000176281|	0.000813374
38-chr14-92500000-97500000	response to other organism	ENSG00000197249|ENSG00000196136|ENSG00000100739|ENSG00000119632|ENSG00000168398|ENSG00000165948|ENSG00000165949|	0.0152816
38-chr14-92500000-97500000	response to pest, pathogen or parasite	ENSG00000197249|ENSG00000196136|ENSG00000100739|ENSG00000119632|ENSG00000168398|ENSG00000165948|ENSG00000165949|	0.0110072
43-chr14-105000000-110000000	immune response	ENSG00000182351|ENSG00000177199|ENSG00000130076|ENSG00000177154|	0.0198043
43-chr14-105000000-110000000	defense response	ENSG00000182351|ENSG00000177199|ENSG00000130076|ENSG00000177154|	0.0308304
25-chr16-60000000-65000000	cell-cell adhesion	ENSG00000140937|ENSG00000179776|ENSG00000150394|	0.00533358
28-chr16-67500000-72500000	nitrogen compound metabolism	ENSG00000157350|ENSG00000198650|ENSG00000181019|ENSG00000196696|ENSG00000090861|ENSG00000090857|ENSG00000140835|	0.0381812
1-chr17-0-5000000	neurophysiological process	ENSG00000108556|ENSG00000159961|ENSG00000180090|ENSG00000108405|ENSG00000174231|ENSG00000174238|ENSG00000141480|ENSG00000182880|ENSG00000183024|ENSG00000180016|ENSG00000180068|ENSG00000172150|ENSG00000184166|ENSG00000161921|ENSG00000127780|ENSG00000172146|	0.0218273
2-chr17-2500000-7500000	neurophysiological process	ENSG00000108556|ENSG00000132535|ENSG00000129221|ENSG00000170175|ENSG00000159961|ENSG00000180090|ENSG00000108405|ENSG00000141480|ENSG00000182880|ENSG00000183024|ENSG00000180016|ENSG00000180068|ENSG00000170296|ENSG00000172150|ENSG00000184166|ENSG00000161921|ENSG00000127780|ENSG00000172146|	0.0287298
4-chr17-7500000-12500000	muscle contraction	ENSG00000006788|ENSG00000125414|ENSG00000133020|ENSG00000141048|ENSG00000109063|ENSG00000109061|	0.00660231
4-chr17-7500000-12500000	muscle development	ENSG00000006788|ENSG00000125414|ENSG00000133020|ENSG00000141048|ENSG00000109063|ENSG00000109061|	0.00956175
5-chr17-10000000-15000000	muscle contraction	ENSG00000006788|ENSG00000125414|ENSG00000133020|ENSG00000141048|ENSG00000109063|ENSG00000109061|	4.22115e-05
5-chr17-10000000-15000000	muscle development	ENSG00000006788|ENSG00000125414|ENSG00000133020|ENSG00000141048|ENSG00000109063|ENSG00000109061|	6.32587e-05
11-chr17-25000000-30000000	taxis	ENSG00000108688|ENSG00000181374|ENSG00000172156|ENSG00000108700|ENSG00000108702|ENSG00000108691|	0.000158604
11-chr17-25000000-30000000	cell-cell signaling	ENSG00000108688|ENSG00000108684|ENSG00000181374|ENSG00000172156|ENSG00000108700|ENSG00000108702|ENSG00000108691|ENSG00000108576|	0.00438086
11-chr17-25000000-30000000	response to chemical stimulus	ENSG00000108688|ENSG00000181374|ENSG00000172156|ENSG00000108700|ENSG00000108702|ENSG00000108691|	0.0314025
11-chr17-25000000-30000000	ion homeostasis	ENSG00000108688|ENSG00000181374|ENSG00000172156|ENSG00000108702|ENSG00000108691|	0.00533358
11-chr17-25000000-30000000	response to wounding	ENSG00000108688|ENSG00000181374|ENSG00000172156|ENSG00000108700|ENSG00000108702|ENSG00000108691|	0.0438959
11-chr17-25000000-30000000	cell homeostasis	ENSG00000108688|ENSG00000181374|ENSG00000172156|ENSG00000108702|ENSG00000108691|	0.00727355
11-chr17-25000000-30000000	locomotory behavior	ENSG00000108688|ENSG00000181374|ENSG00000172156|ENSG00000108700|ENSG00000108702|ENSG00000108691|	0.000202082
12-chr17-27500000-32500000	taxis	ENSG00000108688|ENSG00000167236|ENSG00000161573|ENSG00000161570|ENSG00000161574|ENSG00000006074|ENSG00000006075|ENSG00000181374|ENSG00000172156|ENSG00000108700|ENSG00000108702|ENSG00000129277|ENSG00000108691|	6.50104e-14
12-chr17-27500000-32500000	response to other organism	ENSG00000108688|ENSG00000167236|ENSG00000161573|ENSG00000161570|ENSG00000161574|ENSG00000006074|ENSG00000006075|ENSG00000181374|ENSG00000172156|ENSG00000108700|ENSG00000108702|ENSG00000129277|ENSG00000108691|	3.78303e-06
12-chr17-27500000-32500000	cell-cell signaling	ENSG00000108688|ENSG00000108684|ENSG00000167236|ENSG00000161573|ENSG00000161570|ENSG00000161574|ENSG00000006074|ENSG00000006075|ENSG00000181374|ENSG00000172156|ENSG00000108700|ENSG00000108702|ENSG00000129277|ENSG00000108691|	2.69062e-07
12-chr17-27500000-32500000	response to pest, pathogen or parasite	ENSG00000108688|ENSG00000167236|ENSG00000161573|ENSG00000161570|ENSG00000161574|ENSG00000006074|ENSG00000006075|ENSG00000181374|ENSG00000172156|ENSG00000108700|ENSG00000108702|ENSG00000129277|ENSG00000108691|	1.94501e-06
12-chr17-27500000-32500000	immune response	ENSG00000108688|ENSG00000167236|ENSG00000161573|ENSG00000161570|ENSG00000161574|ENSG00000006074|ENSG00000006075|ENSG00000181374|ENSG00000172156|ENSG00000108700|ENSG00000108702|ENSG00000129277|ENSG00000108691|	0.000130891
12-chr17-27500000-32500000	defense response	ENSG00000108688|ENSG00000167236|ENSG00000161573|ENSG00000161570|ENSG00000161574|ENSG00000006074|ENSG00000006075|ENSG00000181374|ENSG00000172156|ENSG00000108700|ENSG00000108702|ENSG00000129277|ENSG00000108691|	0.000501653
12-chr17-27500000-32500000	response to chemical stimulus	ENSG00000108688|ENSG00000167236|ENSG00000161573|ENSG00000161570|ENSG00000161574|ENSG00000006074|ENSG00000006075|ENSG00000181374|ENSG00000172156|ENSG00000108700|ENSG00000108702|ENSG00000129277|ENSG00000108691|	2.07839e-08
12-chr17-27500000-32500000	viral genome replication	ENSG00000006075|ENSG00000129277|ENSG00000108691|	0.0407469
12-chr17-27500000-32500000	ion homeostasis	ENSG00000108688|ENSG00000167236|ENSG00000161570|ENSG00000161574|ENSG00000006075|ENSG00000181374|ENSG00000172156|ENSG00000108702|ENSG00000108691|	3.11224e-07
12-chr17-27500000-32500000	response to wounding	ENSG00000108688|ENSG00000167236|ENSG00000161573|ENSG00000161570|ENSG00000006074|ENSG00000006075|ENSG00000181374|ENSG00000172156|ENSG00000108700|ENSG00000108702|ENSG00000129277|ENSG00000108691|	7.60359e-07
12-chr17-27500000-32500000	cell homeostasis	ENSG00000108688|ENSG00000167236|ENSG00000161570|ENSG00000161574|ENSG00000006075|ENSG00000181374|ENSG00000172156|ENSG00000108702|ENSG00000108691|	5.99547e-07
12-chr17-27500000-32500000	locomotory behavior	ENSG00000108688|ENSG00000167236|ENSG00000161573|ENSG00000161570|ENSG00000161574|ENSG00000006074|ENSG00000006075|ENSG00000181374|ENSG00000172156|ENSG00000108700|ENSG00000108702|ENSG00000129277|ENSG00000108691|	9.97416e-14
12-chr17-27500000-32500000	neurophysiological process	ENSG00000108688|ENSG00000108684|ENSG00000167236|ENSG00000161573|ENSG00000161570|ENSG00000161574|ENSG00000006074|ENSG00000006075|ENSG00000181374|ENSG00000172156|ENSG00000108700|ENSG00000108702|ENSG00000129277|ENSG00000108691|	7.21549e-05
13-chr17-30000000-35000000	taxis	ENSG00000167236|ENSG00000161573|ENSG00000161570|ENSG00000161574|ENSG00000006074|ENSG00000006075|ENSG00000129277|	0.00065097
13-chr17-30000000-35000000	locomotory behavior	ENSG00000167236|ENSG00000161573|ENSG00000161570|ENSG00000161574|ENSG00000006074|ENSG00000006075|ENSG00000129277|	0.000844321
14-chr17-32500000-37500000	ectoderm development	ENSG00000171403|ENSG00000171401|ENSG00000186847|ENSG00000108759|ENSG00000186395|ENSG00000171346|ENSG00000094796|ENSG00000186831|ENSG00000186832|ENSG00000131737|	5.76661e-08
15-chr17-35000000-40000000	ectoderm development	ENSG00000171403|ENSG00000171401|ENSG00000186847|ENSG00000108759|ENSG00000186395|ENSG00000171346|ENSG00000094796|ENSG00000186831|ENSG00000186832|ENSG00000131737|	3.3458e-06
10-chr18-22500000-27500000	cell-cell adhesion	ENSG00000175065|ENSG00000134760|ENSG00000134762|ENSG00000134765|ENSG00000170558|ENSG00000134755|ENSG00000134757|ENSG00000046604|	5.40165e-09
11-chr18-25000000-30000000	cell-cell adhesion	ENSG00000175065|ENSG00000134760|ENSG00000134762|ENSG00000134765|ENSG00000134755|ENSG00000134757|ENSG00000046604|	8.90189e-07
4-chr19-7500000-12500000	regulation of metabolism	ENSG00000196646|ENSG00000196484|ENSG00000196757|ENSG00000198342|ENSG00000177599|ENSG00000142453|ENSG00000196826|ENSG00000188629|ENSG00000188321|ENSG00000132010|ENSG00000090661|ENSG00000180855|ENSG00000104976|ENSG00000130818|ENSG00000188868|ENSG00000130816|ENSG00000171291|ENSG00000174652|ENSG00000197857|ENSG00000171295|ENSG00000130811|ENSG00000167785|ENSG00000196110|ENSG00000196605|ENSG00000197044…	0.000414842
4-chr19-7500000-12500000	regulation of cellular physiological process	ENSG00000196646|ENSG00000105401|ENSG00000196484|ENSG00000196757|ENSG00000198342|ENSG00000177599|ENSG00000142453|ENSG00000196826|ENSG00000188629|ENSG00000188321|ENSG00000132010|ENSG00000090661|ENSG00000180855|ENSG00000104976|ENSG00000130818|ENSG00000188868|ENSG00000130816|ENSG00000171291|ENSG00000174652|ENSG00000197857|ENSG00000171295|ENSG00000130811|ENSG00000167785|ENSG00000196110|ENSG00000196605…	0.00310779
8-chr19-17500000-22500000	regulation of metabolism	ENSG00000198521|ENSG00000196268|ENSG00000105662|ENSG00000196721|ENSG00000172687|ENSG00000105656|ENSG00000160229|ENSG00000005007|ENSG00000130522|ENSG00000197124|ENSG00000118620|ENSG00000197134|ENSG00000064489|ENSG00000081665|ENSG00000105708|ENSG00000160352|ENSG00000105750|ENSG00000130288|ENSG00000196705|ENSG00000105647|ENSG00000181896|ENSG00000197020|ENSG00000167491|ENSG00000104777|ENSG00000105717…	0.00590034
9-chr19-20000000-25000000	cellular metabolism	ENSG00000167232|ENSG00000198521|ENSG00000196268|ENSG00000196721|ENSG00000172687|ENSG00000160229|ENSG00000180081|ENSG00000196686|ENSG00000118620|ENSG00000197134|ENSG00000196988|ENSG00000160352|ENSG00000105750|ENSG00000197372|ENSG00000196705|ENSG00000197020|ENSG00000198024|ENSG00000104777|ENSG00000196350|ENSG00000197360|ENSG00000183850|	0.0161229
9-chr19-20000000-25000000	primary metabolism	ENSG00000167232|ENSG00000198521|ENSG00000196268|ENSG00000196721|ENSG00000172687|ENSG00000160229|ENSG00000180081|ENSG00000196686|ENSG00000118620|ENSG00000197134|ENSG00000196988|ENSG00000160352|ENSG00000105750|ENSG00000197372|ENSG00000196705|ENSG00000197020|ENSG00000198024|ENSG00000104777|ENSG00000196350|ENSG00000197360|ENSG00000183850|	0.00810044
9-chr19-20000000-25000000	regulation of metabolism	ENSG00000167232|ENSG00000198521|ENSG00000196268|ENSG00000196721|ENSG00000172687|ENSG00000160229|ENSG00000180081|ENSG00000196686|ENSG00000118620|ENSG00000197134|ENSG00000160352|ENSG00000105750|ENSG00000197372|ENSG00000196705|ENSG00000197020|ENSG00000104777|ENSG00000196350|ENSG00000197360|ENSG00000183850|	7.54546e-09
9-chr19-20000000-25000000	regulation of cellular physiological process	ENSG00000167232|ENSG00000198521|ENSG00000196268|ENSG00000196721|ENSG00000172687|ENSG00000160229|ENSG00000180081|ENSG00000196686|ENSG00000118620|ENSG00000197134|ENSG00000160352|ENSG00000105750|ENSG00000197372|ENSG00000196705|ENSG00000197020|ENSG00000104777|ENSG00000196350|ENSG00000197360|ENSG00000183850|	9.9192e-07
10-chr19-22500000-27500000	regulation of metabolism	ENSG00000167232|ENSG00000180081|ENSG00000196686|ENSG00000197372|ENSG00000196350|ENSG00000197360|ENSG00000183850|	0.0101178
16-chr19-37500000-42500000	regulation of metabolism	ENSG00000161298|ENSG00000181007|ENSG00000105698|ENSG00000185869|ENSG00000196967|ENSG00000105663|ENSG00000105672|ENSG00000167637|ENSG00000105679|ENSG00000167635|ENSG00000186020|ENSG00000197050|ENSG00000011590|ENSG00000197863|ENSG00000198453|ENSG00000153879|ENSG00000153896|ENSG00000188283|ENSG00000168813|ENSG00000089335|ENSG00000142065|ENSG00000186017|ENSG00000196357|ENSG00000189042|ENSG00000105258…	0.00144026
16-chr19-37500000-42500000	regulation of cellular physiological process	ENSG00000161298|ENSG00000181007|ENSG00000105698|ENSG00000185869|ENSG00000196967|ENSG00000105663|ENSG00000105672|ENSG00000167637|ENSG00000105679|ENSG00000167635|ENSG00000186020|ENSG00000197050|ENSG00000011590|ENSG00000197863|ENSG00000198453|ENSG00000126247|ENSG00000153879|ENSG00000153896|ENSG00000188283|ENSG00000168813|ENSG00000089335|ENSG00000142065|ENSG00000105185|ENSG00000186017|ENSG00000196357…	0.0334575
17-chr19-40000000-45000000	regulation of metabolism	ENSG00000161298|ENSG00000181007|ENSG00000196437|ENSG00000198182|ENSG00000105698|ENSG00000185869|ENSG00000196967|ENSG00000105663|ENSG00000105672|ENSG00000167637|ENSG00000105679|ENSG00000167635|ENSG00000068903|ENSG00000186020|ENSG00000197050|ENSG00000189164|ENSG00000011590|ENSG00000197863|ENSG00000198453|ENSG00000188283|ENSG00000171827|ENSG00000142065|ENSG00000196235|ENSG00000186017|ENSG00000011332…	0.00065097
17-chr19-40000000-45000000	regulation of cellular physiological process	ENSG00000161298|ENSG00000181007|ENSG00000196437|ENSG00000198182|ENSG00000105698|ENSG00000185869|ENSG00000196967|ENSG00000105663|ENSG00000105672|ENSG00000167637|ENSG00000105679|ENSG00000167635|ENSG00000068903|ENSG00000186020|ENSG00000197050|ENSG00000189164|ENSG00000011590|ENSG00000197863|ENSG00000099341|ENSG00000198453|ENSG00000126247|ENSG00000188283|ENSG00000171827|ENSG00000142065|ENSG00000196235…	0.0486554
19-chr19-45000000-50000000	pregnancy	ENSG00000124435|ENSG00000079385|ENSG00000124467|ENSG00000170853|ENSG00000189231|ENSG00000183668|ENSG00000170848|ENSG00000131113|	2.8209e-06
19-chr19-45000000-50000000	reproductive organismal physiological process	ENSG00000124435|ENSG00000079385|ENSG00000124467|ENSG00000170853|ENSG00000189231|ENSG00000183668|ENSG00000170848|ENSG00000131113|	1.93446e-05
19-chr19-45000000-50000000	regulation of metabolism	ENSG00000178386|ENSG00000028277|ENSG00000062370|ENSG00000069399|ENSG00000079432|ENSG00000090006|ENSG00000187187|ENSG00000197782|ENSG00000176232|ENSG00000167383|ENSG00000167380|ENSG00000167384|ENSG00000128000|ENSG00000105204|ENSG00000186026|ENSG00000171570|ENSG00000159905|ENSG00000159904|ENSG00000176222|ENSG00000160570|ENSG00000159917|ENSG00000159885|ENSG00000142025|ENSG00000159882|ENSG00000011422…	0.00102528
19-chr19-45000000-50000000	regulation of cellular physiological process	ENSG00000178386|ENSG00000028277|ENSG00000062370|ENSG00000069399|ENSG00000079432|ENSG00000090006|ENSG00000167601|ENSG00000187187|ENSG00000197782|ENSG00000176232|ENSG00000167383|ENSG00000167380|ENSG00000167384|ENSG00000128000|ENSG00000105204|ENSG00000186026|ENSG00000171570|ENSG00000159905|ENSG00000159904|ENSG00000176222|ENSG00000160570|ENSG00000159917|ENSG00000159885|ENSG00000142025|ENSG00000159882…	0.00916223
20-chr19-47500000-52500000	pregnancy	ENSG00000124435|ENSG00000079385|ENSG00000124467|ENSG00000170853|ENSG00000189231|ENSG00000183668|ENSG00000170848|ENSG00000131113|	1.58526e-06
20-chr19-47500000-52500000	reproductive organismal physiological process	ENSG00000124435|ENSG00000079385|ENSG00000124467|ENSG00000170853|ENSG00000189231|ENSG00000183668|ENSG00000170848|ENSG00000131113|	1.06649e-05
20-chr19-47500000-52500000	regulation of metabolism	ENSG00000178386|ENSG00000062370|ENSG00000069399|ENSG00000104856|ENSG00000188425|ENSG00000176232|ENSG00000167383|ENSG00000167380|ENSG00000167384|ENSG00000176182|ENSG00000186026|ENSG00000170608|ENSG00000160007|ENSG00000159905|ENSG00000159904|ENSG00000176222|ENSG00000159917|ENSG00000159885|ENSG00000159882|ENSG00000104884|ENSG00000011422|ENSG00000125740|ENSG00000124440|ENSG00000018607|ENSG00000184280…	0.00397569
20-chr19-47500000-52500000	regulation of cellular physiological process	ENSG00000178386|ENSG00000062370|ENSG00000069399|ENSG00000104856|ENSG00000188425|ENSG00000176232|ENSG00000130203|ENSG00000007047|ENSG00000167383|ENSG00000167380|ENSG00000167384|ENSG00000176182|ENSG00000186026|ENSG00000042753|ENSG00000170608|ENSG00000160007|ENSG00000159905|ENSG00000159904|ENSG00000176222|ENSG00000159917|ENSG00000159885|ENSG00000159882|ENSG00000104884|ENSG00000125740|ENSG00000124440…	0.0486554
24-chr19-57500000-62500000	immune response	ENSG00000186152|ENSG00000170866|ENSG00000095752|ENSG00000189430|ENSG00000167633|ENSG00000189096|ENSG00000104974|ENSG00000104972|ENSG00000125498|ENSG00000186818|ENSG00000170858|ENSG00000186431|ENSG00000131042|ENSG00000142405|ENSG00000187095|ENSG00000105609|	0.0106887
24-chr19-57500000-62500000	defense response	ENSG00000186152|ENSG00000170866|ENSG00000095752|ENSG00000189430|ENSG00000167633|ENSG00000189096|ENSG00000167634|ENSG00000104974|ENSG00000104972|ENSG00000022556|ENSG00000125498|ENSG00000186818|ENSG00000170858|ENSG00000186431|ENSG00000131042|ENSG00000142405|ENSG00000187095|ENSG00000105609|	0.00347278
24-chr19-57500000-62500000	regulation of metabolism	ENSG00000198046|ENSG00000018869|ENSG00000197951|ENSG00000198346|ENSG00000196867|ENSG00000196263|ENSG00000198440|ENSG00000131848|ENSG00000083844|ENSG00000105066|ENSG00000197928|ENSG00000196390|ENSG00000167685|ENSG00000123870|ENSG00000170954|ENSG00000197714|ENSG00000197937|ENSG00000198300|ENSG00000141946|ENSG00000167555|ENSG00000167554|ENSG00000171425|ENSG00000196417|ENSG00000142405|ENSG00000130844…	0.0021829
25-chr19-60000000-65000000	cellular metabolism	ENSG00000198046|ENSG00000018869|ENSG00000197951|ENSG00000176293|ENSG00000121406|ENSG00000196867|ENSG00000196263|ENSG00000121417|ENSG00000130725|ENSG00000130726|ENSG00000121413|ENSG00000198440|ENSG00000180532|ENSG00000131845|ENSG00000131848|ENSG00000131849|ENSG00000198131|ENSG00000083844|ENSG00000083845|ENSG00000188785|ENSG00000105066|ENSG00000083838|ENSG00000196724|ENSG00000184294|ENSG00000179909…	0.0094953
25-chr19-60000000-65000000	primary metabolism	ENSG00000198046|ENSG00000018869|ENSG00000197951|ENSG00000176293|ENSG00000121406|ENSG00000196867|ENSG00000196263|ENSG00000121417|ENSG00000130725|ENSG00000130726|ENSG00000121413|ENSG00000198440|ENSG00000180532|ENSG00000131845|ENSG00000131848|ENSG00000131849|ENSG00000198131|ENSG00000083844|ENSG00000083845|ENSG00000188785|ENSG00000105066|ENSG00000083838|ENSG00000196724|ENSG00000184294|ENSG00000179909…	0.00185019
25-chr19-60000000-65000000	regulation of metabolism	ENSG00000198046|ENSG00000018869|ENSG00000197951|ENSG00000176293|ENSG00000121406|ENSG00000196867|ENSG00000196263|ENSG00000121417|ENSG00000130726|ENSG00000121413|ENSG00000198440|ENSG00000180532|ENSG00000131845|ENSG00000131848|ENSG00000131849|ENSG00000198131|ENSG00000083844|ENSG00000188785|ENSG00000105066|ENSG00000083838|ENSG00000196724|ENSG00000184294|ENSG00000179909|ENSG00000171574|ENSG00000083817…	6.54839e-16
25-chr19-60000000-65000000	regulation of cellular physiological process	ENSG00000198046|ENSG00000018869|ENSG00000197951|ENSG00000176293|ENSG00000121406|ENSG00000196867|ENSG00000196263|ENSG00000121417|ENSG00000130726|ENSG00000121413|ENSG00000198440|ENSG00000180532|ENSG00000131845|ENSG00000131848|ENSG00000131849|ENSG00000198131|ENSG00000095752|ENSG00000083844|ENSG00000189430|ENSG00000188785|ENSG00000105066|ENSG00000083838|ENSG00000196724|ENSG00000184294|ENSG00000179909…	2.76855e-12
26-chr19-62500000-67500000	cellular metabolism	ENSG00000176293|ENSG00000121406|ENSG00000121417|ENSG00000130725|ENSG00000130726|ENSG00000121413|ENSG00000180532|ENSG00000131845|ENSG00000131849|ENSG00000198131|ENSG00000083845|ENSG00000188785|ENSG00000083838|ENSG00000196724|ENSG00000184294|ENSG00000179909|ENSG00000171574|ENSG00000083817|ENSG00000083814|ENSG00000083812|ENSG00000198466|ENSG00000178229|ENSG00000183647|ENSG00000083807|ENSG00000152433…	0.000111873
26-chr19-62500000-67500000	primary metabolism	ENSG00000176293|ENSG00000121406|ENSG00000121417|ENSG00000130725|ENSG00000130726|ENSG00000121413|ENSG00000180532|ENSG00000131845|ENSG00000131849|ENSG00000198131|ENSG00000083845|ENSG00000188785|ENSG00000083838|ENSG00000196724|ENSG00000184294|ENSG00000179909|ENSG00000171574|ENSG00000083817|ENSG00000083814|ENSG00000083812|ENSG00000198466|ENSG00000178229|ENSG00000183647|ENSG00000083807|ENSG00000152433…	2.6486e-05
26-chr19-62500000-67500000	regulation of metabolism	ENSG00000176293|ENSG00000121406|ENSG00000121417|ENSG00000130726|ENSG00000121413|ENSG00000180532|ENSG00000131845|ENSG00000131849|ENSG00000198131|ENSG00000188785|ENSG00000083838|ENSG00000196724|ENSG00000184294|ENSG00000179909|ENSG00000171574|ENSG00000083817|ENSG00000083814|ENSG00000083812|ENSG00000198466|ENSG00000178229|ENSG00000183647|ENSG00000152433|ENSG00000182318|ENSG00000152443|ENSG00000152467…	1.57676e-17
26-chr19-62500000-67500000	regulation of cellular physiological process	ENSG00000176293|ENSG00000121406|ENSG00000121417|ENSG00000130726|ENSG00000121413|ENSG00000180532|ENSG00000131845|ENSG00000131849|ENSG00000198131|ENSG00000188785|ENSG00000083838|ENSG00000196724|ENSG00000184294|ENSG00000179909|ENSG00000171574|ENSG00000083817|ENSG00000083814|ENSG00000083812|ENSG00000198466|ENSG00000178229|ENSG00000183647|ENSG00000152433|ENSG00000182318|ENSG00000152443|ENSG00000152467…	1.82108e-13
40-chrX-97500000-102500000	RNA localization	ENSG00000126952|ENSG00000196970|ENSG00000147206|ENSG00000185945|	0.00167078
40-chrX-97500000-102500000	cellular localization	ENSG00000102128|ENSG00000126952|ENSG00000126953|ENSG00000196970|ENSG00000147206|ENSG00000185945|ENSG00000102362|	0.0322972
41-chrX-100000000-105000000	cell organization and biogenesis	ENSG00000172450|ENSG00000102128|ENSG00000158427|ENSG00000126952|ENSG00000126953|ENSG00000196970|ENSG00000101812|ENSG00000147206|ENSG00000123570|ENSG00000123569|ENSG00000185945|ENSG00000123562|ENSG00000158164|	0.0111087
41-chrX-100000000-105000000	RNA localization	ENSG00000126952|ENSG00000196970|ENSG00000147206|ENSG00000185945|	0.00692466
4-chrY-7500000-12500000	development of primary sexual characteristics	ENSG00000185912|ENSG00000168692|	0.044387
9-chrY-20000000-25000000	gametogenesis	ENSG00000012817|ENSG00000174622|ENSG00000169800|ENSG00000131003|	0.0128657
10-chrY-22500000-27500000	fertilization	ENSG00000185894|ENSG00000187191|ENSG00000183795|ENSG00000183753|	0.000130649
10-chrY-22500000-27500000	gametogenesis	ENSG00000172288|ENSG00000187191|ENSG00000169800|ENSG00000131003|	0.0128657
11-chrY-25000000-30000000	fertilization	ENSG00000185894|ENSG00000187191|ENSG00000183795|	0.00128392
8-chr1-17500000-22500000	lipid catabolism	ENSG00000188257|ENSG00000117215|ENSG00000187980|ENSG00000158786|ENSG00000127472|ENSG00000188784|	0.000526863
9-chr1-20000000-25000000	lipid catabolism	ENSG00000188257|ENSG00000117215|ENSG00000187980|ENSG00000158786|ENSG00000127472|ENSG00000188784|	0.00289086
22-chr1-52500000-57500000	lipid metabolism	ENSG00000116133|ENSG00000162390|ENSG00000169174|ENSG00000116171|ENSG00000162407|ENSG00000157184|ENSG00000162409|ENSG00000157193|	0.015019
41-chr1-100000000-105000000	carbohydrate metabolism	ENSG00000162688|ENSG00000187733|ENSG00000174876|ENSG00000117620|ENSG00000051415|ENSG00000196318|ENSG00000197839|ENSG00000162694|	0.000778553
42-chr1-102500000-107500000	carbohydrate metabolism	ENSG00000187733|ENSG00000174876|ENSG00000051415|ENSG00000196318|ENSG00000197839|	0.00605644
60-chr1-147500000-152500000	epidermis development	ENSG00000159455|ENSG00000198854|ENSG00000169474|ENSG00000163216|ENSG00000169469|ENSG00000143556|	0.00815897
61-chr1-150000000-155000000	epidermis development	ENSG00000159455|ENSG00000198854|ENSG00000169474|ENSG00000163216|ENSG00000169469|ENSG00000143556|ENSG00000143320|	0.00168232
63-chr1-155000000-160000000	immune response	ENSG00000132703|ENSG00000158869|ENSG00000122223|ENSG00000122224|ENSG00000158473|ENSG00000158477|ENSG00000143226|ENSG00000158874|ENSG00000073754|ENSG00000162747|ENSG00000072694|ENSG00000158769|ENSG00000163563|ENSG00000158488|ENSG00000163565|ENSG00000158481|ENSG00000163568|ENSG00000158485|ENSG00000117090|ENSG00000179639|ENSG00000132693|ENSG00000026751|	4.21839e-06
76-chr1-187500000-192500000	negative regulation of signal transduction	ENSG00000116741|ENSG00000090104|ENSG00000127074|ENSG00000150681|	0.000331352
76-chr1-187500000-192500000	regulation of signal transduction	ENSG00000116741|ENSG00000090104|ENSG00000127074|ENSG00000150681|ENSG00000023572|	0.00094768
77-chr1-190000000-195000000	negative regulation of signal transduction	ENSG00000116741|ENSG00000090104|ENSG00000127074|ENSG00000150681|	0.000743145
77-chr1-190000000-195000000	regulation of signal transduction	ENSG00000116741|ENSG00000090104|ENSG00000127074|ENSG00000150681|ENSG00000023572|	0.00275344
80-chr1-197500000-202500000	regulation of muscle contraction	ENSG00000077157|ENSG00000118194|ENSG00000133055|ENSG00000159173|	0.00934008
82-chr1-202500000-207500000	humoral immune response	ENSG00000117335|ENSG00000123838|ENSG00000123843|ENSG00000136634|ENSG00000196352|ENSG00000117322|	0.00854509
82-chr1-202500000-207500000	response to pest, pathogen or parasite	ENSG00000117335|ENSG00000123838|ENSG00000123843|ENSG00000162894|ENSG00000162891|ENSG00000196188|ENSG00000136634|ENSG00000196352|ENSG00000117322|	0.00969504
82-chr1-202500000-207500000	immune response	ENSG00000142224|ENSG00000117335|ENSG00000143466|ENSG00000123838|ENSG00000123843|ENSG00000162894|ENSG00000162891|ENSG00000162892|ENSG00000196188|ENSG00000136634|ENSG00000196352|ENSG00000117322|	0.000592226
83-chr1-205000000-210000000	humoral immune response	ENSG00000117335|ENSG00000123838|ENSG00000123843|ENSG00000136634|ENSG00000196352|ENSG00000117322|	0.00260574
83-chr1-205000000-210000000	response to pest, pathogen or parasite	ENSG00000117335|ENSG00000123838|ENSG00000123843|ENSG00000162894|ENSG00000162891|ENSG00000136634|ENSG00000196352|ENSG00000117322|	0.0134125
83-chr1-205000000-210000000	immune response	ENSG00000142224|ENSG00000117335|ENSG00000123838|ENSG00000123843|ENSG00000162894|ENSG00000162891|ENSG00000162892|ENSG00000136634|ENSG00000196352|ENSG00000117322|	0.00327605
98-chr1-242500000-247500000	sensory perception	ENSG00000169214|ENSG00000177212|ENSG00000196936|ENSG00000177174|ENSG00000198281|ENSG00000171180|ENSG00000182783|ENSG00000183130|ENSG00000187701|ENSG00000177201|ENSG00000177233|ENSG00000197437|ENSG00000198452|ENSG00000197591|ENSG00000162711|ENSG00000177186|ENSG00000196071|ENSG00000196079|ENSG00000196539|ENSG00000198601|ENSG00000183310|ENSG00000197454|ENSG00000153230|ENSG00000177151|ENSG00000162727|	1.49782e-15
98-chr1-242500000-247500000	cell surface receptor linked signal transduction	ENSG00000169214|ENSG00000177212|ENSG00000196936|ENSG00000177174|ENSG00000177489|ENSG00000198281|ENSG00000171180|ENSG00000182783|ENSG00000183130|ENSG00000184022|ENSG00000175143|ENSG00000198128|ENSG00000177275|ENSG00000187701|ENSG00000177201|ENSG00000175180|ENSG00000177233|ENSG00000196772|ENSG00000197437|ENSG00000198452|ENSG00000197591|ENSG00000177186|ENSG00000196944|ENSG00000177476|ENSG00000196071…	2.21041e-22
99-chr1-245000000-250000000	sensory perception	ENSG00000169214|ENSG00000177212|ENSG00000196936|ENSG00000177174|ENSG00000198281|ENSG00000171180|ENSG00000182783|ENSG00000183130|ENSG00000187701|ENSG00000177201|ENSG00000177233|ENSG00000197437|ENSG00000198452|ENSG00000197591|ENSG00000162711|ENSG00000177186|ENSG00000196071|ENSG00000196079|ENSG00000196539|ENSG00000198601|ENSG00000183310|ENSG00000197454|ENSG00000153230|ENSG00000177151|ENSG00000162727|	9.66642e-17
99-chr1-245000000-250000000	cell surface receptor linked signal transduction	ENSG00000169214|ENSG00000177212|ENSG00000196936|ENSG00000177174|ENSG00000177489|ENSG00000198281|ENSG00000171180|ENSG00000182783|ENSG00000183130|ENSG00000184022|ENSG00000175143|ENSG00000198128|ENSG00000177275|ENSG00000187701|ENSG00000177201|ENSG00000175180|ENSG00000177233|ENSG00000196772|ENSG00000197437|ENSG00000198452|ENSG00000197591|ENSG00000177186|ENSG00000196944|ENSG00000177476|ENSG00000196071…	4.02226e-25
32-chr2-77500000-82500000	acute-phase response	ENSG00000143954|ENSG00000172016|	0.0322427
35-chr2-85000000-90000000	immune response	ENSG00000153563|ENSG00000163245|ENSG00000122156|ENSG00000172038|ENSG00000172116|ENSG00000173758|ENSG00000169769|ENSG00000173799|ENSG00000115523|ENSG00000153587|ENSG00000153586|ENSG00000173782|ENSG00000184817|	0.000361592
36-chr2-87500000-92500000	immune response	ENSG00000163245|ENSG00000122156|ENSG00000172038|ENSG00000173758|ENSG00000169769|ENSG00000173799|ENSG00000153587|ENSG00000153586|ENSG00000173782|ENSG00000184817|	1.63943e-05
45-chr2-110000000-115000000	immune response	ENSG00000125538|ENSG00000136689|ENSG00000136688|ENSG00000136696|ENSG00000136697|ENSG00000136694|ENSG00000136695|ENSG00000125571|ENSG00000115008|	0.0322427
45-chr2-110000000-115000000	inflammatory response	ENSG00000125538|ENSG00000136689|ENSG00000136697|ENSG00000136694|ENSG00000136695|ENSG00000115008|	0.00994742
45-chr2-110000000-115000000	heat generation	ENSG00000125538|ENSG00000115008|	0.0136004
46-chr2-112500000-117500000	response to pest, pathogen or parasite	ENSG00000125538|ENSG00000136689|ENSG00000136688|ENSG00000136697|ENSG00000136694|ENSG00000136695|ENSG00000115008|	0.0322427
46-chr2-112500000-117500000	immune response	ENSG00000125538|ENSG00000136689|ENSG00000136688|ENSG00000136696|ENSG00000136697|ENSG00000136694|ENSG00000136695|ENSG00000125571|ENSG00000115008|	0.00501856
46-chr2-112500000-117500000	inflammatory response	ENSG00000125538|ENSG00000136689|ENSG00000136697|ENSG00000136694|ENSG00000136695|ENSG00000115008|	0.00291488
46-chr2-112500000-117500000	heat generation	ENSG00000125538|ENSG00000115008|	0.00934008
53-chr2-130000000-135000000	determination of bilateral symmetry	ENSG00000136698|ENSG00000152093|	0.0398939
13-chr3-30000000-35000000	taxis	ENSG00000153551|ENSG00000183813|ENSG00000170293|ENSG00000091317|	0.025089
13-chr3-30000000-35000000	chemotaxis	ENSG00000153551|ENSG00000183813|ENSG00000170293|ENSG00000091317|	0.025089
18-chr3-42500000-47500000	taxis	ENSG00000163823|ENSG00000121807|ENSG00000144648|ENSG00000183625|ENSG00000173585|ENSG00000173578|	0.00804199
18-chr3-42500000-47500000	chemotaxis	ENSG00000163823|ENSG00000121807|ENSG00000144648|ENSG00000183625|ENSG00000173585|ENSG00000173578|	0.00804199
18-chr3-42500000-47500000	cell ion homeostasis	ENSG00000163823|ENSG00000121807|ENSG00000183625|ENSG00000012223|ENSG00000173585|ENSG00000173578|	0.00679032
31-chr3-75000000-80000000	positive regulation of neurogenesis	ENSG00000185008|ENSG00000169855|	0.00548959
31-chr3-75000000-80000000	regulation of neurogenesis	ENSG00000185008|ENSG00000169855|	0.0193483
31-chr3-75000000-80000000	regulation of axonogenesis	ENSG00000185008|ENSG00000169855|	0.0100998
40-chr3-97500000-102500000	cell surface receptor linked signal transduction	ENSG00000187900|ENSG00000197036|ENSG00000197621|ENSG00000181828|ENSG00000197938|ENSG00000188974|ENSG00000154165|ENSG00000196098|ENSG00000183185|ENSG00000196578|ENSG00000144820|	0.0231603
59-chr3-145000000-150000000	membrane organization and biogenesis	ENSG00000188313|ENSG00000163746|ENSG00000114698|	0.00759472
18-chr4-42500000-47500000	ion transport	ENSG00000183783|ENSG00000109158|ENSG00000151834|ENSG00000163285|ENSG00000163288|ENSG00000145246|	0.0461584
19-chr4-45000000-50000000	ion transport	ENSG00000198515|ENSG00000109158|ENSG00000151834|ENSG00000163285|ENSG00000163288|ENSG00000145248|ENSG00000145246|	0.00677286
28-chr4-67500000-72500000	response to xenobiotic stimulus	ENSG00000135226|ENSG00000126550|ENSG00000156096|ENSG00000197592|ENSG00000198277|	5.6319e-05
28-chr4-67500000-72500000	xenobiotic metabolism	ENSG00000135226|ENSG00000126550|ENSG00000156096|ENSG00000197592|ENSG00000198277|	3.33461e-05
28-chr4-67500000-72500000	ossification	ENSG00000126549|ENSG00000132464|ENSG00000126550|ENSG00000178522|	0.00713622
29-chr4-70000000-75000000	ossification	ENSG00000126549|ENSG00000132464|ENSG00000126550|ENSG00000178522|	0.00487807
30-chr4-72500000-77500000	response to pest, pathogen or parasite	ENSG00000163739|ENSG00000163737|ENSG00000163735|ENSG00000163734|ENSG00000124875|ENSG00000081041|ENSG00000169245|ENSG00000169248|ENSG00000169429|ENSG00000138755|	0.00178207
30-chr4-72500000-77500000	taxis	ENSG00000163739|ENSG00000163737|ENSG00000163736|ENSG00000163735|ENSG00000163734|ENSG00000124875|ENSG00000081041|ENSG00000169245|ENSG00000169248|ENSG00000169429|ENSG00000138755|	7.98708e-11
30-chr4-72500000-77500000	chemotaxis	ENSG00000163739|ENSG00000163737|ENSG00000163736|ENSG00000163735|ENSG00000163734|ENSG00000124875|ENSG00000081041|ENSG00000169245|ENSG00000169248|ENSG00000169429|ENSG00000138755|	7.98708e-11
30-chr4-72500000-77500000	immune response	ENSG00000163739|ENSG00000163737|ENSG00000163736|ENSG00000163735|ENSG00000163734|ENSG00000124875|ENSG00000081041|ENSG00000169245|ENSG00000169248|ENSG00000109272|ENSG00000169429|ENSG00000081051|ENSG00000138755|	0.000107581
30-chr4-72500000-77500000	inflammatory response	ENSG00000163739|ENSG00000163737|ENSG00000163735|ENSG00000163734|ENSG00000124875|ENSG00000081041|ENSG00000169245|ENSG00000169248|ENSG00000169429|ENSG00000138755|	5.06033e-07
31-chr4-75000000-80000000	response to pest, pathogen or parasite	ENSG00000163737|ENSG00000163735|ENSG00000163734|ENSG00000081041|ENSG00000169245|ENSG00000169248|ENSG00000156234|ENSG00000138755|	0.0240871
31-chr4-75000000-80000000	taxis	ENSG00000163737|ENSG00000163736|ENSG00000163735|ENSG00000163734|ENSG00000081041|ENSG00000169245|ENSG00000169248|ENSG00000156234|ENSG00000138755|	2.37749e-08
31-chr4-75000000-80000000	chemotaxis	ENSG00000163737|ENSG00000163736|ENSG00000163735|ENSG00000163734|ENSG00000081041|ENSG00000169245|ENSG00000169248|ENSG00000156234|ENSG00000138755|	2.37749e-08
31-chr4-75000000-80000000	immune response	ENSG00000163737|ENSG00000163736|ENSG00000163735|ENSG00000163734|ENSG00000081041|ENSG00000169245|ENSG00000169248|ENSG00000156234|ENSG00000138755|	0.0451209
31-chr4-75000000-80000000	inflammatory response	ENSG00000163737|ENSG00000163735|ENSG00000163734|ENSG00000081041|ENSG00000169245|ENSG00000169248|ENSG00000156234|ENSG00000138755|	5.18552e-05
35-chr4-85000000-90000000	ossification	ENSG00000152592|ENSG00000152591|ENSG00000029559|ENSG00000118785|	0.0013189
36-chr4-87500000-92500000	ossification	ENSG00000152592|ENSG00000152591|ENSG00000029559|ENSG00000118785|	0.00159898
40-chr4-97500000-102500000	alcohol metabolism	ENSG00000196616|ENSG00000172955|ENSG00000187758|ENSG00000196344|ENSG00000198099|ENSG00000197894|	0.00228604
41-chr4-100000000-105000000	alcohol metabolism	ENSG00000196616|ENSG00000172955|ENSG00000187758|ENSG00000196344|ENSG00000198099|ENSG00000197894|	0.0105732
62-chr4-152500000-157500000	blood pressure regulation	ENSG00000171557|ENSG00000171560|ENSG00000171564|	0.0322132
63-chr4-155000000-160000000	blood pressure regulation	ENSG00000171557|ENSG00000171560|ENSG00000171564|	0.0276819
16-chr5-37500000-42500000	cytolysis	ENSG00000113600|ENSG00000039537|ENSG00000112936|	0.00321977
56-chr5-137500000-142500000	synaptogenesis	ENSG00000197479|ENSG00000196963|ENSG00000113209|ENSG00000081818|ENSG00000112852|ENSG00000113211|ENSG00000187372|ENSG00000120324|ENSG00000120327|ENSG00000113205|	7.17709e-15
56-chr5-137500000-142500000	synapse organization and biogenesis	ENSG00000197479|ENSG00000196963|ENSG00000113209|ENSG00000081818|ENSG00000112852|ENSG00000113211|ENSG00000187372|ENSG00000120324|ENSG00000120327|ENSG00000113205|	1.38389e-14
56-chr5-137500000-142500000	calcium-dependent cell-cell adhesion	ENSG00000197479|ENSG00000081853|ENSG00000196963|ENSG00000113209|ENSG00000081818|ENSG00000112852|ENSG00000113212|ENSG00000113211|ENSG00000187372|ENSG00000120324|ENSG00000120327|ENSG00000113205|	4.31486e-20
56-chr5-137500000-142500000	homophilic cell adhesion	ENSG00000197479|ENSG00000113555|ENSG00000081853|ENSG00000196963|ENSG00000081842|ENSG00000113209|ENSG00000081818|ENSG00000112852|ENSG00000146001|ENSG00000113212|ENSG00000113211|ENSG00000187372|ENSG00000120328|ENSG00000171815|ENSG00000120322|ENSG00000120324|ENSG00000120327|ENSG00000113248|ENSG00000156453|ENSG00000113205|	9.7787e-24
56-chr5-137500000-142500000	transmission of nerve impulse	ENSG00000197479|ENSG00000196963|ENSG00000113209|ENSG00000081818|ENSG00000112852|ENSG00000113211|ENSG00000187372|ENSG00000120324|ENSG00000120327|ENSG00000113205|	0.000807375
57-chr5-140000000-145000000	synaptogenesis	ENSG00000197479|ENSG00000196963|ENSG00000113209|ENSG00000081818|ENSG00000112852|ENSG00000113211|ENSG00000187372|ENSG00000120324|ENSG00000120327|ENSG00000113205|	5.3615e-17
57-chr5-140000000-145000000	synapse organization and biogenesis	ENSG00000197479|ENSG00000196963|ENSG00000113209|ENSG00000081818|ENSG00000112852|ENSG00000113211|ENSG00000187372|ENSG00000120324|ENSG00000120327|ENSG00000113205|	9.87755e-17
57-chr5-140000000-145000000	calcium-dependent cell-cell adhesion	ENSG00000197479|ENSG00000081853|ENSG00000196963|ENSG00000113209|ENSG00000081818|ENSG00000112852|ENSG00000113212|ENSG00000113211|ENSG00000187372|ENSG00000120324|ENSG00000120327|ENSG00000113205|	1.00886e-22
57-chr5-140000000-145000000	homophilic cell adhesion	ENSG00000197479|ENSG00000113555|ENSG00000081853|ENSG00000196963|ENSG00000081842|ENSG00000113209|ENSG00000081818|ENSG00000112852|ENSG00000146001|ENSG00000113212|ENSG00000113211|ENSG00000187372|ENSG00000120328|ENSG00000171815|ENSG00000120322|ENSG00000120324|ENSG00000120327|ENSG00000113248|ENSG00000156453|ENSG00000113205|	1.23187e-28
57-chr5-140000000-145000000	transmission of nerve impulse	ENSG00000197479|ENSG00000196963|ENSG00000113209|ENSG00000081818|ENSG00000112852|ENSG00000113211|ENSG00000187372|ENSG00000120324|ENSG00000120327|ENSG00000113205|	1.06871e-05
10-chr6-22500000-27500000	protein metabolism	ENSG00000196787|ENSG00000187475|ENSG00000010704|ENSG00000180573|ENSG00000137259|ENSG00000188987|ENSG00000196176|ENSG00000164508|ENSG00000196966|ENSG00000168242|ENSG00000198518|ENSG00000178458|ENSG00000196226|ENSG00000112343|ENSG00000124610|ENSG00000184825|ENSG00000112727|ENSG00000158403|ENSG00000197697|ENSG00000124578|ENSG00000158406|ENSG00000124575|ENSG00000168298|ENSG00000198339|ENSG00000112812…	1.52154e-08
10-chr6-22500000-27500000	organelle organization and biogenesis	ENSG00000196787|ENSG00000187475|ENSG00000180573|ENSG00000137259|ENSG00000188987|ENSG00000196176|ENSG00000164508|ENSG00000196966|ENSG00000168242|ENSG00000198518|ENSG00000178458|ENSG00000196226|ENSG00000124610|ENSG00000184825|ENSG00000112727|ENSG00000158403|ENSG00000197697|ENSG00000124578|ENSG00000158406|ENSG00000124575|ENSG00000168298|ENSG00000198339|ENSG00000158373|ENSG00000146047|ENSG00000198327…	9.58072e-27
10-chr6-22500000-27500000	cellular macromolecule metabolism	ENSG00000196787|ENSG00000187475|ENSG00000010704|ENSG00000180573|ENSG00000137259|ENSG00000188987|ENSG00000196176|ENSG00000164508|ENSG00000196966|ENSG00000168242|ENSG00000198518|ENSG00000178458|ENSG00000196226|ENSG00000112343|ENSG00000124610|ENSG00000184825|ENSG00000112727|ENSG00000158403|ENSG00000197697|ENSG00000124578|ENSG00000158406|ENSG00000124575|ENSG00000168298|ENSG00000198339|ENSG00000112812…	1.91323e-08
10-chr6-22500000-27500000	nucleobase, nucleoside, nucleotide and nucleic acid metabolism	ENSG00000196787|ENSG00000187475|ENSG00000180573|ENSG00000137259|ENSG00000188987|ENSG00000196176|ENSG00000124532|ENSG00000164508|ENSG00000196966|ENSG00000168242|ENSG00000198518|ENSG00000178458|ENSG00000196226|ENSG00000124610|ENSG00000184825|ENSG00000112727|ENSG00000158403|ENSG00000197697|ENSG00000124578|ENSG00000158406|ENSG00000124575|ENSG00000168298|ENSG00000112312|ENSG00000198339|ENSG00000158373…	2.01447e-08
10-chr6-22500000-27500000	biopolymer metabolism	ENSG00000196787|ENSG00000187475|ENSG00000180573|ENSG00000137259|ENSG00000188987|ENSG00000196176|ENSG00000164508|ENSG00000196966|ENSG00000168242|ENSG00000198518|ENSG00000178458|ENSG00000196226|ENSG00000112343|ENSG00000124610|ENSG00000184825|ENSG00000112727|ENSG00000158403|ENSG00000197697|ENSG00000124578|ENSG00000158406|ENSG00000124575|ENSG00000168298|ENSG00000112312|ENSG00000198339|ENSG00000112812…	9.5307e-11
11-chr6-25000000-30000000	protein metabolism	ENSG00000196787|ENSG00000187475|ENSG00000010704|ENSG00000197153|ENSG00000180573|ENSG00000137259|ENSG00000196866|ENSG00000188987|ENSG00000196747|ENSG00000196176|ENSG00000164508|ENSG00000196374|ENSG00000196966|ENSG00000168242|ENSG00000198518|ENSG00000178458|ENSG00000196501|ENSG00000196226|ENSG00000112343|ENSG00000124610|ENSG00000184825|ENSG00000112727|ENSG00000158403|ENSG00000197697|ENSG00000124578…	2.76075e-10
11-chr6-25000000-30000000	organelle organization and biogenesis	ENSG00000196787|ENSG00000187475|ENSG00000197153|ENSG00000180573|ENSG00000137259|ENSG00000196866|ENSG00000188987|ENSG00000196747|ENSG00000196176|ENSG00000164508|ENSG00000196374|ENSG00000196966|ENSG00000168242|ENSG00000198518|ENSG00000178458|ENSG00000196501|ENSG00000196226|ENSG00000124610|ENSG00000184825|ENSG00000112727|ENSG00000158403|ENSG00000197697|ENSG00000124578|ENSG00000158406|ENSG00000124575…	3.95253e-36
11-chr6-25000000-30000000	cellular macromolecule metabolism	ENSG00000196787|ENSG00000187475|ENSG00000010704|ENSG00000197153|ENSG00000180573|ENSG00000137259|ENSG00000196866|ENSG00000188987|ENSG00000196747|ENSG00000196176|ENSG00000164508|ENSG00000196374|ENSG00000196966|ENSG00000168242|ENSG00000198518|ENSG00000178458|ENSG00000196501|ENSG00000196226|ENSG00000112343|ENSG00000124610|ENSG00000184825|ENSG00000112727|ENSG00000158403|ENSG00000197697|ENSG00000124578…	3.72294e-10
11-chr6-25000000-30000000	nucleobase, nucleoside, nucleotide and nucleic acid metabolism	ENSG00000196787|ENSG00000187475|ENSG00000197202|ENSG00000197153|ENSG00000187626|ENSG00000180573|ENSG00000137259|ENSG00000196866|ENSG00000188987|ENSG00000196747|ENSG00000196176|ENSG00000164508|ENSG00000196374|ENSG00000196966|ENSG00000168242|ENSG00000198518|ENSG00000178458|ENSG00000197657|ENSG00000158691|ENSG00000196501|ENSG00000196226|ENSG00000124610|ENSG00000184825|ENSG00000112727|ENSG00000158403…	2.66788e-19
11-chr6-25000000-30000000	biopolymer metabolism	ENSG00000196787|ENSG00000187475|ENSG00000197202|ENSG00000197153|ENSG00000180573|ENSG00000137259|ENSG00000196866|ENSG00000188987|ENSG00000196747|ENSG00000196176|ENSG00000164508|ENSG00000196374|ENSG00000196966|ENSG00000168242|ENSG00000198518|ENSG00000178458|ENSG00000196501|ENSG00000196226|ENSG00000112343|ENSG00000124610|ENSG00000184825|ENSG00000112727|ENSG00000158403|ENSG00000197697|ENSG00000124578…	3.08992e-13
12-chr6-27500000-32500000	organelle organization and biogenesis	ENSG00000197153|ENSG00000196866|ENSG00000196747|ENSG00000196374|ENSG00000196501|ENSG00000196331|ENSG00000197238|ENSG00000198374|ENSG00000184357|ENSG00000185130|ENSG00000197914|ENSG00000198558|ENSG00000184348|ENSG00000182572|ENSG00000182611|	0.000780776
12-chr6-27500000-32500000	nucleobase, nucleoside, nucleotide and nucleic acid metabolism	ENSG00000197202|ENSG00000137310|ENSG00000197153|ENSG00000187626|ENSG00000196866|ENSG00000066379|ENSG00000196747|ENSG00000137411|ENSG00000196374|ENSG00000198563|ENSG00000197657|ENSG00000158691|ENSG00000196501|ENSG00000096654|ENSG00000196331|ENSG00000137185|ENSG00000187987|ENSG00000196812|ENSG00000197238|ENSG00000198374|ENSG00000184357|ENSG00000185130|ENSG00000197062|ENSG00000197914|ENSG00000197279…	1.12824e-06
13-chr6-30000000-35000000	immune response	ENSG00000168384|ENSG00000168383|ENSG00000196301|ENSG00000168394|ENSG00000196735|ENSG00000172899|ENSG00000168379|ENSG00000198502|ENSG00000196126|ENSG00000112493|ENSG00000179344|	0.0233307
11-chr7-25000000-30000000	nucleobase, nucleoside, nucleotide and nucleic acid metabolism	ENSG00000105991|ENSG00000105997|ENSG00000105996|ENSG00000122565|ENSG00000122566|ENSG00000197576|ENSG00000106004|ENSG00000106006|ENSG00000172115|ENSG00000122592|ENSG00000146592|ENSG00000005073|ENSG00000050344|ENSG00000106049|ENSG00000106031|ENSG00000106038|ENSG00000153814|ENSG00000078399|ENSG00000153807|	0.00204746
11-chr7-25000000-30000000	regulation of cellular metabolism	ENSG00000105991|ENSG00000105997|ENSG00000105996|ENSG00000122565|ENSG00000197576|ENSG00000106004|ENSG00000106006|ENSG00000122592|ENSG00000146592|ENSG00000005073|ENSG00000050344|ENSG00000106031|ENSG00000106038|ENSG00000153814|ENSG00000078399|ENSG00000153807|	0.00210995
39-chr7-95000000-100000000	response to xenobiotic stimulus	ENSG00000106258|ENSG00000021461|ENSG00000160870|ENSG00000160868|	0.0108683
39-chr7-95000000-100000000	xenobiotic metabolism	ENSG00000106258|ENSG00000021461|ENSG00000160870|ENSG00000160868|	0.00756087
40-chr7-97500000-102500000	response to xenobiotic stimulus	ENSG00000106258|ENSG00000021461|ENSG00000160870|ENSG00000160868|	0.0329839
40-chr7-97500000-102500000	xenobiotic metabolism	ENSG00000106258|ENSG00000021461|ENSG00000160870|ENSG00000160868|	0.0230892
57-chr7-140000000-145000000	cell surface receptor linked signal transduction	ENSG00000185899|ENSG00000127364|ENSG00000127366|ENSG00000127362|ENSG00000006530|ENSG00000170356|ENSG00000183609|ENSG00000179420|ENSG00000106123|ENSG00000173525|ENSG00000176510|ENSG00000146904|ENSG00000179468|ENSG00000183122|	0.0386996
2-chr8-2500000-7500000	response to pest, pathogen or parasite	ENSG00000177243|ENSG00000185918|ENSG00000164825|ENSG00000164822|ENSG00000164821|ENSG00000186599|ENSG00000177257|ENSG00000164816|	0.00094768
2-chr8-2500000-7500000	response to xenobiotic stimulus	ENSG00000185918|ENSG00000164822|ENSG00000164821|ENSG00000164816|	0.000426725
2-chr8-2500000-7500000	xenobiotic metabolism	ENSG00000185918|ENSG00000164822|ENSG00000164821|ENSG00000164816|	0.000298301
2-chr8-2500000-7500000	defense response to fungi	ENSG00000185918|ENSG00000164822|ENSG00000164821|ENSG00000164816|	8.74416e-06
2-chr8-2500000-7500000	response to fungi	ENSG00000185918|ENSG00000164822|ENSG00000164821|ENSG00000164816|	2.43901e-05
2-chr8-2500000-7500000	defense response to bacteria	ENSG00000177023|ENSG00000177243|ENSG00000198129|ENSG00000185918|ENSG00000164825|ENSG00000164822|ENSG00000164821|ENSG00000186599|ENSG00000177257|ENSG00000164816|ENSG00000187082|	1.82611e-17
2-chr8-2500000-7500000	response to bacteria	ENSG00000177023|ENSG00000177243|ENSG00000198129|ENSG00000185918|ENSG00000164825|ENSG00000164822|ENSG00000164821|ENSG00000186599|ENSG00000177257|ENSG00000164816|ENSG00000187082|	2.16669e-16
3-chr8-5000000-10000000	response to pest, pathogen or parasite	ENSG00000178287|ENSG00000177243|ENSG00000185918|ENSG00000164825|ENSG00000164822|ENSG00000164821|ENSG00000176797|ENSG00000186562|ENSG00000171711|ENSG00000186599|ENSG00000177257|ENSG00000164816|	1.78716e-05
3-chr8-5000000-10000000	response to xenobiotic stimulus	ENSG00000185918|ENSG00000164822|ENSG00000164821|ENSG00000164816|	0.0038306
3-chr8-5000000-10000000	xenobiotic metabolism	ENSG00000185918|ENSG00000164822|ENSG00000164821|ENSG00000164816|	0.00261496
3-chr8-5000000-10000000	defense response to fungi	ENSG00000185918|ENSG00000164822|ENSG00000164821|ENSG00000164816|	9.47828e-05
3-chr8-5000000-10000000	response to fungi	ENSG00000185918|ENSG00000164822|ENSG00000164821|ENSG00000164816|	0.000267228
3-chr8-5000000-10000000	defense response to bacteria	ENSG00000177023|ENSG00000186579|ENSG00000186572|ENSG00000176782|ENSG00000177243|ENSG00000198129|ENSG00000185918|ENSG00000164825|ENSG00000164822|ENSG00000164821|ENSG00000176797|ENSG00000186562|ENSG00000171711|ENSG00000186599|ENSG00000177257|ENSG00000164816|ENSG00000187082|	8.16274e-27
3-chr8-5000000-10000000	response to bacteria	ENSG00000177023|ENSG00000186579|ENSG00000186572|ENSG00000176782|ENSG00000177243|ENSG00000198129|ENSG00000185918|ENSG00000164825|ENSG00000164822|ENSG00000164821|ENSG00000176797|ENSG00000186562|ENSG00000171711|ENSG00000186599|ENSG00000177257|ENSG00000164816|ENSG00000187082|	4.42463e-25
4-chr8-7500000-12500000	defense response to bacteria	ENSG00000186579|ENSG00000186572|ENSG00000176782|ENSG00000176797|ENSG00000186562|ENSG00000171711|	4.19018e-05
4-chr8-7500000-12500000	response to bacteria	ENSG00000186579|ENSG00000186572|ENSG00000176782|ENSG00000176797|ENSG00000186562|ENSG00000171711|	0.000152093
10-chr8-22500000-27500000	programmed cell death	ENSG00000120907|ENSG00000120899|ENSG00000104228|ENSG00000173530|ENSG00000173535|ENSG00000120889|ENSG00000104689|ENSG00000104765|	0.01929
34-chr8-82500000-87500000	one-carbon compound metabolism	ENSG00000185015|ENSG00000164879|ENSG00000104267|ENSG00000133742|	0.000399961
35-chr8-85000000-90000000	one-carbon compound metabolism	ENSG00000185015|ENSG00000164879|ENSG00000104267|ENSG00000133742|	0.000225135
3-chr9-5000000-10000000	pregnancy	ENSG00000120211|ENSG00000107014|ENSG00000107018|	0.031983
8-chr9-17500000-22500000	response to pest, pathogen or parasite	ENSG00000186809|ENSG00000120247|ENSG00000186803|ENSG00000120242|ENSG00000184995|ENSG00000137026|ENSG00000137080|ENSG00000171855|ENSG00000120235|ENSG00000188379|ENSG00000147885|ENSG00000147877|ENSG00000177047|ENSG00000147873|	4.811e-10
8-chr9-17500000-22500000	response to virus	ENSG00000186809|ENSG00000120247|ENSG00000186803|ENSG00000120242|ENSG00000184995|ENSG00000137026|ENSG00000137080|ENSG00000171855|ENSG00000120235|ENSG00000188379|ENSG00000147885|ENSG00000147877|ENSG00000177047|ENSG00000147873|	2.16849e-22
9-chr9-20000000-25000000	response to pest, pathogen or parasite	ENSG00000186809|ENSG00000120247|ENSG00000186803|ENSG00000120242|ENSG00000184995|ENSG00000137026|ENSG00000137080|ENSG00000171855|ENSG00000120235|ENSG00000188379|ENSG00000147885|ENSG00000147877|ENSG00000177047|ENSG00000147873|	3.07274e-11
9-chr9-20000000-25000000	response to virus	ENSG00000186809|ENSG00000120247|ENSG00000186803|ENSG00000120242|ENSG00000184995|ENSG00000137026|ENSG00000137080|ENSG00000171855|ENSG00000120235|ENSG00000188379|ENSG00000147885|ENSG00000147877|ENSG00000177047|ENSG00000147873|	1.21488e-23
49-chr9-120000000-125000000	sensory perception	ENSG00000136939|ENSG00000171496|ENSG00000171505|ENSG00000197233|ENSG00000136940|ENSG00000171481|ENSG00000165202|ENSG00000165204|ENSG00000136834|	0.0311061
49-chr9-120000000-125000000	cell surface receptor linked signal transduction	ENSG00000171459|ENSG00000136939|ENSG00000171496|ENSG00000171505|ENSG00000171501|ENSG00000148215|ENSG00000197233|ENSG00000173679|ENSG00000106804|ENSG00000171484|ENSG00000171481|ENSG00000165202|ENSG00000165204|ENSG00000136832|ENSG00000136834|ENSG00000188394|	0.000372718
50-chr9-122500000-127500000	cell surface receptor linked signal transduction	ENSG00000171459|ENSG00000136939|ENSG00000171496|ENSG00000171505|ENSG00000171501|ENSG00000148215|ENSG00000197233|ENSG00000173679|ENSG00000106804|ENSG00000171484|ENSG00000171481|ENSG00000165202|ENSG00000165204|ENSG00000136832|ENSG00000136834|ENSG00000180264|ENSG00000188394|	0.00688957
1-chr10-0-5000000	terpenoid metabolism	ENSG00000148377|ENSG00000067064|	0.0157989
1-chr11-0-5000000	cell surface receptor linked signal transduction	ENSG00000176893|ENSG00000176895|ENSG00000129965|ENSG00000069696|ENSG00000175609|ENSG00000176900|ENSG00000176904|ENSG00000176937|ENSG00000188069|ENSG00000197790|ENSG00000182170|ENSG00000197428|ENSG00000176798|ENSG00000171999|ENSG00000180785|ENSG00000181963|ENSG00000176925|ENSG00000196778|ENSG00000176922|ENSG00000197674|ENSG00000184350|ENSG00000185885|ENSG00000167244|ENSG00000174775|ENSG00000176879…	0.00204746
2-chr11-2500000-7500000	sensory perception	ENSG00000184698|ENSG00000176893|ENSG00000176895|ENSG00000167355|ENSG00000167359|ENSG00000175609|ENSG00000181009|ENSG00000183251|ENSG00000176787|ENSG00000181001|ENSG00000181609|ENSG00000187918|ENSG00000176904|ENSG00000180919|ENSG00000176748|ENSG00000176239|ENSG00000176742|ENSG00000197428|ENSG00000180947|ENSG00000184478|ENSG00000110148|ENSG00000176798|ENSG00000180988|ENSG00000184321|ENSG00000166368…	3.88715e-20
2-chr11-2500000-7500000	cell surface receptor linked signal transduction	ENSG00000184698|ENSG00000176893|ENSG00000176895|ENSG00000167355|ENSG00000170782|ENSG00000167359|ENSG00000175609|ENSG00000181009|ENSG00000183251|ENSG00000176787|ENSG00000181001|ENSG00000181609|ENSG00000187918|ENSG00000176900|ENSG00000180909|ENSG00000176904|ENSG00000176937|ENSG00000188069|ENSG00000180913|ENSG00000180919|ENSG00000197790|ENSG00000181616|ENSG00000176748|ENSG00000182170|ENSG00000176239…	1.23187e-28
3-chr11-5000000-10000000	sensory perception	ENSG00000184698|ENSG00000167355|ENSG00000167359|ENSG00000181009|ENSG00000183251|ENSG00000176787|ENSG00000181001|ENSG00000181609|ENSG00000187918|ENSG00000180919|ENSG00000176748|ENSG00000176239|ENSG00000176742|ENSG00000180947|ENSG00000184478|ENSG00000110148|ENSG00000180988|ENSG00000184321|ENSG00000166368|ENSG00000183269|ENSG00000180974|ENSG00000183303|ENSG00000171944|ENSG00000182070|ENSG00000184881…	3.1804e-17
3-chr11-5000000-10000000	cell surface receptor linked signal transduction	ENSG00000184698|ENSG00000167355|ENSG00000170782|ENSG00000167359|ENSG00000181009|ENSG00000183251|ENSG00000176787|ENSG00000181001|ENSG00000181609|ENSG00000187918|ENSG00000180909|ENSG00000180913|ENSG00000180919|ENSG00000181616|ENSG00000176748|ENSG00000176239|ENSG00000176742|ENSG00000176716|ENSG00000166333|ENSG00000180947|ENSG00000184478|ENSG00000188124|ENSG00000110148|ENSG00000178358|ENSG00000180934…	8.25257e-20
7-chr11-15000000-20000000	acute-phase response	ENSG00000173432|ENSG00000166787|ENSG00000134339|ENSG00000148965|	0.00202365
8-chr11-17500000-22500000	acute-phase response	ENSG00000173432|ENSG00000166787|ENSG00000134339|ENSG00000148965|	0.00139443
20-chr11-47500000-52500000	cell surface receptor linked signal transduction	ENSG00000186483|ENSG00000149177|ENSG00000185926|ENSG00000176555|ENSG00000176540|ENSG00000176547|ENSG00000109920|ENSG00000176567|ENSG00000172208|ENSG00000176537|ENSG00000178306|ENSG00000175619|	0.000842573
22-chr11-52500000-57500000	sensory perception	ENSG00000149133|ENSG00000172459|ENSG00000181903|ENSG00000172487|ENSG00000174914|ENSG00000181761|ENSG00000181273|ENSG00000181767|ENSG00000181785|ENSG00000174957|ENSG00000181961|ENSG00000181371|ENSG00000174942|ENSG00000186117|ENSG00000172464|ENSG00000181693|ENSG00000186113|ENSG00000181282|ENSG00000181698|ENSG00000172154|ENSG00000186119|ENSG00000181935|ENSG00000198877|ENSG00000150269|ENSG00000150261…	1.59666e-19
22-chr11-52500000-57500000	cell surface receptor linked signal transduction	ENSG00000149133|ENSG00000172459|ENSG00000172457|ENSG00000181903|ENSG00000172199|ENSG00000172489|ENSG00000172487|ENSG00000172188|ENSG00000184741|ENSG00000181296|ENSG00000186124|ENSG00000174914|ENSG00000197468|ENSG00000181761|ENSG00000188439|ENSG00000181273|ENSG00000181767|ENSG00000187612|ENSG00000181780|ENSG00000134817|ENSG00000181718|ENSG00000181785|ENSG00000174957|ENSG00000184878|ENSG00000181961…	1.02292e-33
23-chr11-55000000-60000000	sensory perception	ENSG00000149133|ENSG00000172459|ENSG00000172289|ENSG00000172381|ENSG00000181903|ENSG00000172487|ENSG00000166884|ENSG00000172365|ENSG00000172362|ENSG00000174914|ENSG00000172320|ENSG00000172769|ENSG00000172324|ENSG00000181761|ENSG00000181273|ENSG00000181767|ENSG00000181785|ENSG00000174957|ENSG00000176495|ENSG00000181371|ENSG00000174942|ENSG00000186117|ENSG00000172464|ENSG00000181693|ENSG00000186113…	1.23187e-28
23-chr11-55000000-60000000	cell surface receptor linked signal transduction	ENSG00000149133|ENSG00000172459|ENSG00000172457|ENSG00000172289|ENSG00000172381|ENSG00000181903|ENSG00000172199|ENSG00000172489|ENSG00000172487|ENSG00000166884|ENSG00000198283|ENSG00000172188|ENSG00000184741|ENSG00000181296|ENSG00000172365|ENSG00000172362|ENSG00000186124|ENSG00000174914|ENSG00000172320|ENSG00000172769|ENSG00000172324|ENSG00000197468|ENSG00000181761|ENSG00000188439|ENSG00000181273…	3.02565e-43
24-chr11-57500000-62500000	sensory perception	ENSG00000172289|ENSG00000172381|ENSG00000166884|ENSG00000172365|ENSG00000172362|ENSG00000172320|ENSG00000172769|ENSG00000172324|ENSG00000167995|ENSG00000176495|ENSG00000172377|ENSG00000172772|ENSG00000186509|ENSG00000176200|ENSG00000176205|ENSG00000180475|ENSG00000149489|	0.0003446
24-chr11-57500000-62500000	cell surface receptor linked signal transduction	ENSG00000162188|ENSG00000172289|ENSG00000172381|ENSG00000166884|ENSG00000198283|ENSG00000168539|ENSG00000183134|ENSG00000172365|ENSG00000172362|ENSG00000172320|ENSG00000172769|ENSG00000172324|ENSG00000172742|ENSG00000186513|ENSG00000176495|ENSG00000198261|ENSG00000196779|ENSG00000197887|ENSG00000172377|ENSG00000172774|ENSG00000172772|ENSG00000186509|ENSG00000176200|ENSG00000176205|ENSG00000149534…	0.000555189
28-chr11-67500000-72500000	vitamin transport	ENSG00000165457|ENSG00000110195|ENSG00000110203|	0.0205489
28-chr11-67500000-72500000	cofactor transport	ENSG00000165457|ENSG00000110195|ENSG00000110203|	0.00918665
29-chr11-70000000-75000000	vitamin transport	ENSG00000165457|ENSG00000110195|ENSG00000110203|	0.0234514
29-chr11-70000000-75000000	cofactor transport	ENSG00000165457|ENSG00000110195|ENSG00000110203|	0.0102728
40-chr11-97500000-102500000	cellular catabolism	ENSG00000149968|ENSG00000196611|ENSG00000166670|ENSG00000137745|ENSG00000137673|ENSG00000118113|	0.013749
40-chr11-97500000-102500000	macromolecule catabolism	ENSG00000149968|ENSG00000196611|ENSG00000166670|ENSG00000137745|ENSG00000137673|ENSG00000118113|	0.00261496
41-chr11-100000000-105000000	protein metabolism	ENSG00000110330|ENSG00000118168|ENSG00000149968|ENSG00000196611|ENSG00000166670|ENSG00000196954|ENSG00000023445|ENSG00000137757|ENSG00000137752|ENSG00000170967|ENSG00000137745|ENSG00000137673|ENSG00000137675|ENSG00000137674|ENSG00000118113|ENSG00000110347|	0.00399018
41-chr11-100000000-105000000	cellular macromolecule metabolism	ENSG00000110330|ENSG00000118168|ENSG00000149968|ENSG00000196611|ENSG00000166670|ENSG00000196954|ENSG00000023445|ENSG00000137757|ENSG00000137752|ENSG00000170967|ENSG00000137745|ENSG00000137673|ENSG00000137675|ENSG00000137674|ENSG00000118113|ENSG00000110347|	0.00435453
41-chr11-100000000-105000000	regulation of programmed cell death	ENSG00000110330|ENSG00000118168|ENSG00000196954|ENSG00000023445|ENSG00000137757|ENSG00000137752|	0.0140244
41-chr11-100000000-105000000	macromolecule catabolism	ENSG00000149968|ENSG00000196611|ENSG00000166670|ENSG00000137745|ENSG00000137673|ENSG00000118113|	0.031983
42-chr11-102500000-107500000	regulation of programmed cell death	ENSG00000118168|ENSG00000196954|ENSG00000137757|ENSG00000137752|ENSG00000166266|	0.0141636
42-chr11-102500000-107500000	programmed cell death	ENSG00000110675|ENSG00000118168|ENSG00000196954|ENSG00000137757|ENSG00000137752|ENSG00000166266|	0.00934008
46-chr11-112500000-117500000	lipid transport	ENSG00000118137|ENSG00000110245|ENSG00000110244|ENSG00000110243|	0.025089
49-chr11-120000000-125000000	sensory perception	ENSG00000181518|ENSG00000154134|ENSG00000171014|ENSG00000182634|ENSG00000109927|ENSG00000186268|ENSG00000198657|ENSG00000197263|ENSG00000197125|ENSG00000170953|ENSG00000196341|ENSG00000196703|ENSG00000181457|ENSG00000196099|ENSG00000197849|ENSG00000181499|ENSG00000196661|ENSG00000173365|	6.50533e-09
49-chr11-120000000-125000000	cell surface receptor linked signal transduction	ENSG00000197309|ENSG00000181518|ENSG00000198674|ENSG00000149403|ENSG00000171014|ENSG00000182634|ENSG00000186268|ENSG00000198657|ENSG00000197263|ENSG00000196119|ENSG00000197125|ENSG00000170953|ENSG00000196341|ENSG00000185932|ENSG00000196403|ENSG00000196703|ENSG00000181457|ENSG00000196099|ENSG00000197849|ENSG00000181499|ENSG00000196661|ENSG00000173365|ENSG00000196248|ENSG00000181214|	5.55136e-08
50-chr11-122500000-127500000	sensory perception	ENSG00000181518|ENSG00000154134|ENSG00000171014|ENSG00000182634|ENSG00000186268|ENSG00000198657|ENSG00000197263|ENSG00000197125|ENSG00000170953|ENSG00000196341|ENSG00000196703|ENSG00000181457|ENSG00000196099|ENSG00000197849|ENSG00000181499|ENSG00000196661|ENSG00000173365|	1.77505e-07
50-chr11-122500000-127500000	cell surface receptor linked signal transduction	ENSG00000197309|ENSG00000181518|ENSG00000198674|ENSG00000171014|ENSG00000182634|ENSG00000186268|ENSG00000198657|ENSG00000197263|ENSG00000196119|ENSG00000197125|ENSG00000170953|ENSG00000196341|ENSG00000196403|ENSG00000196703|ENSG00000181457|ENSG00000196099|ENSG00000197849|ENSG00000181499|ENSG00000196661|ENSG00000173365|ENSG00000196248|ENSG00000181214|	1.16338e-05
3-chr12-5000000-10000000	humoral immune response	ENSG00000110852|ENSG00000166523|ENSG00000182326|ENSG00000139193|ENSG00000111729|ENSG00000111796|ENSG00000150045|ENSG00000177575|ENSG00000069493|	0.000551106
3-chr12-5000000-10000000	response to pest, pathogen or parasite	ENSG00000171860|ENSG00000110852|ENSG00000166523|ENSG00000182326|ENSG00000139187|ENSG00000010610|ENSG00000139193|ENSG00000111729|ENSG00000111796|ENSG00000159335|ENSG00000150045|ENSG00000177575|ENSG00000069493|	0.00452842
3-chr12-5000000-10000000	immune response	ENSG00000198178|ENSG00000171860|ENSG00000110852|ENSG00000166523|ENSG00000166527|ENSG00000182326|ENSG00000139187|ENSG00000010610|ENSG00000139193|ENSG00000111729|ENSG00000111796|ENSG00000159335|ENSG00000150045|ENSG00000177575|ENSG00000111732|ENSG00000069493|ENSG00000111321|	0.000551106
4-chr12-7500000-12500000	humoral immune response	ENSG00000134539|ENSG00000183542|ENSG00000110852|ENSG00000166523|ENSG00000111729|ENSG00000111796|ENSG00000172243|ENSG00000021602|ENSG00000150045|ENSG00000177575|ENSG00000069493|ENSG00000134545|	4.21911e-08
4-chr12-7500000-12500000	response to pest, pathogen or parasite	ENSG00000134539|ENSG00000171860|ENSG00000183542|ENSG00000173391|ENSG00000110852|ENSG00000166523|ENSG00000139187|ENSG00000111729|ENSG00000111796|ENSG00000172243|ENSG00000021602|ENSG00000150045|ENSG00000177575|ENSG00000069493|ENSG00000134545|	2.66791e-05
4-chr12-7500000-12500000	cell surface receptor linked signal transduction	ENSG00000173342|ENSG00000134539|ENSG00000121377|ENSG00000171860|ENSG00000070018|ENSG00000121318|ENSG00000196229|ENSG00000121314|ENSG00000121381|ENSG00000139187|ENSG00000111729|ENSG00000110848|ENSG00000165682|ENSG00000111796|ENSG00000186136|ENSG00000021602|ENSG00000150045|ENSG00000197870|ENSG00000069493|ENSG00000134551|ENSG00000134545|	0.00339367
4-chr12-7500000-12500000	immune response	ENSG00000134539|ENSG00000198178|ENSG00000171860|ENSG00000183542|ENSG00000173391|ENSG00000110852|ENSG00000166523|ENSG00000166527|ENSG00000139187|ENSG00000111729|ENSG00000111796|ENSG00000172243|ENSG00000021602|ENSG00000150045|ENSG00000177575|ENSG00000111732|ENSG00000069493|ENSG00000134545|	1.31418e-05
5-chr12-10000000-15000000	cell surface receptor linked signal transduction	ENSG00000173342|ENSG00000134539|ENSG00000121377|ENSG00000150086|ENSG00000070019|ENSG00000070018|ENSG00000121318|ENSG00000196229|ENSG00000121314|ENSG00000121381|ENSG00000183935|ENSG00000013588|ENSG00000165682|ENSG00000183150|ENSG00000186136|ENSG00000021602|ENSG00000111291|ENSG00000197870|ENSG00000134551|ENSG00000134545|	0.00127806
7-chr14-15000000-20000000	sensory perception	ENSG00000176299|ENSG00000176294|ENSG00000184394|ENSG00000176219|ENSG00000176253|ENSG00000169484|ENSG00000182652|ENSG00000176246|ENSG00000155249|ENSG00000176198|ENSG00000176281|ENSG00000165762|	5.28547e-06
7-chr14-15000000-20000000	cell surface receptor linked signal transduction	ENSG00000176299|ENSG00000176294|ENSG00000176230|ENSG00000176312|ENSG00000184394|ENSG00000176213|ENSG00000176219|ENSG00000176253|ENSG00000196832|ENSG00000186445|ENSG00000169484|ENSG00000169488|ENSG00000182652|ENSG00000176246|ENSG00000155249|ENSG00000176198|ENSG00000176281|ENSG00000196143|ENSG00000165762|	2.87834e-09
8-chr14-17500000-22500000	sensory perception	ENSG00000176299|ENSG00000176294|ENSG00000172611|ENSG00000184394|ENSG00000092200|ENSG00000176219|ENSG00000176253|ENSG00000169208|ENSG00000169202|ENSG00000169484|ENSG00000169385|ENSG00000182652|ENSG00000176246|ENSG00000155249|ENSG00000176198|ENSG00000176281|ENSG00000165762|	3.95295e-05
8-chr14-17500000-22500000	cell surface receptor linked signal transduction	ENSG00000181803|ENSG00000176299|ENSG00000176294|ENSG00000176230|ENSG00000176312|ENSG00000172611|ENSG00000184394|ENSG00000176213|ENSG00000176219|ENSG00000165804|ENSG00000169327|ENSG00000176253|ENSG00000169208|ENSG00000196832|ENSG00000186445|ENSG00000169202|ENSG00000169484|ENSG00000169488|ENSG00000182652|ENSG00000176246|ENSG00000155249|ENSG00000176198|ENSG00000176281|ENSG00000196143|ENSG00000165762|	0.000105458
38-chr14-92500000-97500000	response to pest, pathogen or parasite	ENSG00000197249|ENSG00000196136|ENSG00000119632|ENSG00000168398|ENSG00000165948|ENSG00000165949|ENSG00000100739|	0.0233307
43-chr14-105000000-110000000	immune response	ENSG00000182351|ENSG00000177199|ENSG00000130076|ENSG00000177154|	0.039658
16-chr15-37500000-42500000	lipid catabolism	ENSG00000168970|ENSG00000137841|ENSG00000159337|ENSG00000188089|ENSG00000168907|	0.0444558
25-chr16-60000000-65000000	homophilic cell adhesion	ENSG00000140937|ENSG00000150394|ENSG00000179776|	0.00220598
26-chr16-62500000-67500000	homophilic cell adhesion	ENSG00000039068|ENSG00000140937|ENSG00000062038|ENSG00000166589|ENSG00000179776|	0.0332245
1-chr17-0-5000000	sensory perception	ENSG00000159961|ENSG00000180090|ENSG00000174231|ENSG00000174238|ENSG00000141480|ENSG00000182880|ENSG00000183024|ENSG00000180016|ENSG00000180068|ENSG00000172150|ENSG00000184166|ENSG00000161921|ENSG00000127780|ENSG00000172146|	0.0269363
3-chr17-5000000-10000000	alkene metabolism	ENSG00000108839|ENSG00000179593|ENSG00000179148|ENSG00000179477|	0.0102727
4-chr17-7500000-12500000	striated muscle contraction	ENSG00000006788|ENSG00000125414|ENSG00000133020|ENSG00000141048|ENSG00000109063|ENSG00000109061|	3.16676e-06
5-chr17-10000000-15000000	striated muscle contraction	ENSG00000006788|ENSG00000125414|ENSG00000133020|ENSG00000141048|ENSG00000109063|ENSG00000109061|	1.33855e-08
11-chr17-25000000-30000000	taxis	ENSG00000108688|ENSG00000181374|ENSG00000172156|ENSG00000108700|ENSG00000108702|ENSG00000108691|	0.000361592
11-chr17-25000000-30000000	chemotaxis	ENSG00000108688|ENSG00000181374|ENSG00000172156|ENSG00000108700|ENSG00000108702|ENSG00000108691|	0.000361592
11-chr17-25000000-30000000	inflammatory response	ENSG00000108688|ENSG00000181374|ENSG00000172156|ENSG00000108700|ENSG00000108702|ENSG00000108691|	0.00501856
11-chr17-25000000-30000000	cell ion homeostasis	ENSG00000108688|ENSG00000181374|ENSG00000172156|ENSG00000108702|ENSG00000108691|	0.00671752
12-chr17-27500000-32500000	humoral immune response	ENSG00000108688|ENSG00000161573|ENSG00000161574|ENSG00000006074|ENSG00000006075|ENSG00000108691|	0.0161428
12-chr17-27500000-32500000	response to pest, pathogen or parasite	ENSG00000108688|ENSG00000167236|ENSG00000161573|ENSG00000161570|ENSG00000161574|ENSG00000006074|ENSG00000006075|ENSG00000181374|ENSG00000172156|ENSG00000108700|ENSG00000108702|ENSG00000129277|ENSG00000108691|	5.09876e-06
12-chr17-27500000-32500000	sensory perception	ENSG00000108688|ENSG00000167236|ENSG00000161573|ENSG00000161570|ENSG00000161574|ENSG00000006074|ENSG00000006075|ENSG00000181374|ENSG00000172156|ENSG00000108700|ENSG00000108702|ENSG00000129277|ENSG00000108691|	5.15579e-05
12-chr17-27500000-32500000	taxis	ENSG00000108688|ENSG00000167236|ENSG00000161573|ENSG00000161570|ENSG00000161574|ENSG00000006074|ENSG00000006075|ENSG00000181374|ENSG00000172156|ENSG00000108700|ENSG00000108702|ENSG00000129277|ENSG00000108691|	8.46698e-14
12-chr17-27500000-32500000	chemotaxis	ENSG00000108688|ENSG00000167236|ENSG00000161573|ENSG00000161570|ENSG00000161574|ENSG00000006074|ENSG00000006075|ENSG00000181374|ENSG00000172156|ENSG00000108700|ENSG00000108702|ENSG00000129277|ENSG00000108691|	8.46698e-14
12-chr17-27500000-32500000	immune response	ENSG00000108688|ENSG00000167236|ENSG00000161573|ENSG00000161570|ENSG00000161574|ENSG00000006074|ENSG00000006075|ENSG00000181374|ENSG00000172156|ENSG00000108700|ENSG00000108702|ENSG00000129277|ENSG00000108691|	0.000361592
12-chr17-27500000-32500000	inflammatory response	ENSG00000108688|ENSG00000167236|ENSG00000161573|ENSG00000161570|ENSG00000006074|ENSG00000006075|ENSG00000181374|ENSG00000172156|ENSG00000108700|ENSG00000108702|ENSG00000129277|ENSG00000108691|	2.23622e-09
12-chr17-27500000-32500000	cell ion homeostasis	ENSG00000108688|ENSG00000167236|ENSG00000161570|ENSG00000161574|ENSG00000006075|ENSG00000181374|ENSG00000172156|ENSG00000108702|ENSG00000108691|	2.44225e-07
13-chr17-30000000-35000000	taxis	ENSG00000167236|ENSG00000161573|ENSG00000161570|ENSG00000161574|ENSG00000006074|ENSG00000006075|ENSG00000129277|	0.00143308
13-chr17-30000000-35000000	chemotaxis	ENSG00000167236|ENSG00000161573|ENSG00000161570|ENSG00000161574|ENSG00000006074|ENSG00000006075|ENSG00000129277|	0.00143308
14-chr17-32500000-37500000	epidermis development	ENSG00000171403|ENSG00000171401|ENSG00000186847|ENSG00000108759|ENSG00000186395|ENSG00000171346|ENSG00000094796|ENSG00000186831|ENSG00000186832|ENSG00000131737|	2.89476e-08
15-chr17-35000000-40000000	epidermis development	ENSG00000171403|ENSG00000171401|ENSG00000186847|ENSG00000108759|ENSG00000186395|ENSG00000171346|ENSG00000094796|ENSG00000186831|ENSG00000186832|ENSG00000131737|	1.91655e-06
10-chr18-22500000-27500000	homophilic cell adhesion	ENSG00000175065|ENSG00000134760|ENSG00000134762|ENSG00000134765|ENSG00000170558|ENSG00000134755|ENSG00000134757|ENSG00000046604|	9.82888e-11
11-chr18-25000000-30000000	homophilic cell adhesion	ENSG00000175065|ENSG00000134760|ENSG00000134762|ENSG00000134765|ENSG00000134755|ENSG00000134757|ENSG00000046604|	3.11826e-08
4-chr19-7500000-12500000	regulation of cellular metabolism	ENSG00000196646|ENSG00000196484|ENSG00000196757|ENSG00000198342|ENSG00000177599|ENSG00000142453|ENSG00000196826|ENSG00000188629|ENSG00000188321|ENSG00000132010|ENSG00000090661|ENSG00000180855|ENSG00000104976|ENSG00000130818|ENSG00000188868|ENSG00000130816|ENSG00000171291|ENSG00000174652|ENSG00000197857|ENSG00000171295|ENSG00000130811|ENSG00000167785|ENSG00000196110|ENSG00000196605|ENSG00000197044…	0.000385458
8-chr19-17500000-22500000	regulation of cellular metabolism	ENSG00000198521|ENSG00000196268|ENSG00000105662|ENSG00000196721|ENSG00000172687|ENSG00000105656|ENSG00000160229|ENSG00000005007|ENSG00000130522|ENSG00000197124|ENSG00000118620|ENSG00000197134|ENSG00000064489|ENSG00000081665|ENSG00000105708|ENSG00000160352|ENSG00000105750|ENSG00000130288|ENSG00000196705|ENSG00000105647|ENSG00000181896|ENSG00000197020|ENSG00000167491|ENSG00000104777|ENSG00000105717…	0.005637
9-chr19-20000000-25000000	nucleobase, nucleoside, nucleotide and nucleic acid metabolism	ENSG00000167232|ENSG00000198521|ENSG00000196268|ENSG00000196721|ENSG00000172687|ENSG00000160229|ENSG00000180081|ENSG00000196686|ENSG00000118620|ENSG00000197134|ENSG00000196988|ENSG00000160352|ENSG00000105750|ENSG00000197372|ENSG00000196705|ENSG00000197020|ENSG00000198024|ENSG00000104777|ENSG00000196350|ENSG00000197360|ENSG00000183850|	1.30737e-08
9-chr19-20000000-25000000	regulation of cellular metabolism	ENSG00000167232|ENSG00000198521|ENSG00000196268|ENSG00000196721|ENSG00000172687|ENSG00000160229|ENSG00000180081|ENSG00000196686|ENSG00000118620|ENSG00000197134|ENSG00000160352|ENSG00000105750|ENSG00000197372|ENSG00000196705|ENSG00000197020|ENSG00000104777|ENSG00000196350|ENSG00000197360|ENSG00000183850|	1.2571e-08
10-chr19-22500000-27500000	regulation of cellular metabolism	ENSG00000167232|ENSG00000180081|ENSG00000196686|ENSG00000197372|ENSG00000196350|ENSG00000197360|ENSG00000183850|	0.0179178
16-chr19-37500000-42500000	regulation of cellular metabolism	ENSG00000161298|ENSG00000181007|ENSG00000105698|ENSG00000185869|ENSG00000196967|ENSG00000105663|ENSG00000105672|ENSG00000105679|ENSG00000186020|ENSG00000197050|ENSG00000011590|ENSG00000197863|ENSG00000198453|ENSG00000153879|ENSG00000153896|ENSG00000188283|ENSG00000168813|ENSG00000089335|ENSG00000142065|ENSG00000186017|ENSG00000196357|ENSG00000189042|ENSG00000105258|ENSG00000197800|ENSG00000196761…	0.00204746
17-chr19-40000000-45000000	regulation of cellular metabolism	ENSG00000161298|ENSG00000181007|ENSG00000196437|ENSG00000198182|ENSG00000105698|ENSG00000185869|ENSG00000196967|ENSG00000105663|ENSG00000105672|ENSG00000105679|ENSG00000186020|ENSG00000197050|ENSG00000189164|ENSG00000011590|ENSG00000197863|ENSG00000198453|ENSG00000188283|ENSG00000171827|ENSG00000142065|ENSG00000196235|ENSG00000186017|ENSG00000011332|ENSG00000171817|ENSG00000181666|ENSG00000189144…	0.00133593
19-chr19-45000000-50000000	pregnancy	ENSG00000124435|ENSG00000079385|ENSG00000124467|ENSG00000170853|ENSG00000189231|ENSG00000183668|ENSG00000170848|ENSG00000131113|	5.28547e-06
20-chr19-47500000-52500000	pregnancy	ENSG00000124435|ENSG00000079385|ENSG00000124467|ENSG00000170853|ENSG00000189231|ENSG00000183668|ENSG00000170848|ENSG00000131113|	2.95663e-06
20-chr19-47500000-52500000	regulation of cellular metabolism	ENSG00000178386|ENSG00000062370|ENSG00000069399|ENSG00000104856|ENSG00000188425|ENSG00000176232|ENSG00000167383|ENSG00000167380|ENSG00000167384|ENSG00000186026|ENSG00000170608|ENSG00000160007|ENSG00000159905|ENSG00000159904|ENSG00000176222|ENSG00000159917|ENSG00000159885|ENSG00000159882|ENSG00000104884|ENSG00000125740|ENSG00000124440|ENSG00000018607|ENSG00000184280|ENSG00000170684|ENSG00000186019…	0.011479
24-chr19-57500000-62500000	regulation of cellular metabolism	ENSG00000198046|ENSG00000018869|ENSG00000197951|ENSG00000198346|ENSG00000196867|ENSG00000196263|ENSG00000198440|ENSG00000131848|ENSG00000197928|ENSG00000196390|ENSG00000167685|ENSG00000123870|ENSG00000170954|ENSG00000197714|ENSG00000197937|ENSG00000198300|ENSG00000141946|ENSG00000167555|ENSG00000167554|ENSG00000171425|ENSG00000196417|ENSG00000142405|ENSG00000130844|ENSG00000198603|ENSG00000167562…	0.00416395
24-chr19-57500000-62500000	immune response	ENSG00000186152|ENSG00000170866|ENSG00000095752|ENSG00000189096|ENSG00000104974|ENSG00000104972|ENSG00000125498|ENSG00000186818|ENSG00000170858|ENSG00000186431|ENSG00000131042|ENSG00000142405|ENSG00000187095|ENSG00000105609|ENSG00000189430|ENSG00000167633|	0.0265143
25-chr19-60000000-65000000	nucleobase, nucleoside, nucleotide and nucleic acid metabolism	ENSG00000198046|ENSG00000018869|ENSG00000197951|ENSG00000176293|ENSG00000121406|ENSG00000196867|ENSG00000196263|ENSG00000121417|ENSG00000130726|ENSG00000121413|ENSG00000198440|ENSG00000180532|ENSG00000131845|ENSG00000131848|ENSG00000131849|ENSG00000198131|ENSG00000083838|ENSG00000184294|ENSG00000179909|ENSG00000171574|ENSG00000083817|ENSG00000167685|ENSG00000083814|ENSG00000083812|ENSG00000198466…	6.54147e-10
25-chr19-60000000-65000000	regulation of cellular metabolism	ENSG00000198046|ENSG00000018869|ENSG00000197951|ENSG00000176293|ENSG00000121406|ENSG00000196867|ENSG00000196263|ENSG00000121417|ENSG00000130726|ENSG00000121413|ENSG00000198440|ENSG00000180532|ENSG00000131845|ENSG00000131848|ENSG00000131849|ENSG00000198131|ENSG00000083838|ENSG00000184294|ENSG00000179909|ENSG00000171574|ENSG00000083817|ENSG00000167685|ENSG00000083814|ENSG00000083812|ENSG00000198466…	6.74616e-16
26-chr19-62500000-67500000	nucleobase, nucleoside, nucleotide and nucleic acid metabolism	ENSG00000176293|ENSG00000121406|ENSG00000121417|ENSG00000130726|ENSG00000121413|ENSG00000180532|ENSG00000131845|ENSG00000131849|ENSG00000198131|ENSG00000083838|ENSG00000184294|ENSG00000179909|ENSG00000171574|ENSG00000083817|ENSG00000083814|ENSG00000083812|ENSG00000198466|ENSG00000178229|ENSG00000183647|ENSG00000152433|ENSG00000182318|ENSG00000152443|ENSG00000152467|ENSG00000186272|ENSG00000119574…	1.35914e-11
26-chr19-62500000-67500000	regulation of cellular metabolism	ENSG00000176293|ENSG00000121406|ENSG00000121417|ENSG00000130726|ENSG00000121413|ENSG00000180532|ENSG00000131845|ENSG00000131849|ENSG00000198131|ENSG00000083838|ENSG00000184294|ENSG00000179909|ENSG00000171574|ENSG00000083817|ENSG00000083814|ENSG00000083812|ENSG00000198466|ENSG00000178229|ENSG00000183647|ENSG00000152433|ENSG00000182318|ENSG00000152443|ENSG00000152467|ENSG00000186272|ENSG00000119574…	1.41011e-17
1-chr20-0-5000000	defense response to bacteria	ENSG00000125788|ENSG00000186458|ENSG00000088782|ENSG00000178591|ENSG00000125903|ENSG00000185982|	0.0011081
1-chr20-0-5000000	response to bacteria	ENSG00000125788|ENSG00000186458|ENSG00000088782|ENSG00000178591|ENSG00000125903|ENSG00000185982|	0.00340005
11-chr20-25000000-30000000	defense response to bacteria	ENSG00000131068|ENSG00000180424|ENSG00000180383|ENSG00000180483|	0.00667805
11-chr20-25000000-30000000	response to bacteria	ENSG00000131068|ENSG00000180424|ENSG00000180383|ENSG00000180483|	0.0139051
12-chr20-27500000-32500000	response to bacteria	ENSG00000131068|ENSG00000198183|ENSG00000180424|ENSG00000180383|ENSG00000180483|	0.0118216
13-chr22-30000000-35000000	lipid transport	ENSG00000100336|ENSG00000170420|ENSG00000128313|ENSG00000128335|ENSG00000100342|ENSG00000128284|	7.696e-05
14-chr22-32500000-37500000	lipid transport	ENSG00000100336|ENSG00000170420|ENSG00000128313|ENSG00000128335|ENSG00000100342|ENSG00000128284|	0.00215213
40-chrX-97500000-102500000	establishment of RNA localization	ENSG00000126952|ENSG00000196970|ENSG00000147206|ENSG00000185945|	0.00307659
40-chrX-97500000-102500000	nucleobase, nucleoside, nucleotide and nucleic acid transport	ENSG00000126952|ENSG00000196970|ENSG00000147206|ENSG00000185945|	0.00626712
41-chrX-100000000-105000000	establishment of RNA localization	ENSG00000126952|ENSG00000196970|ENSG00000147206|ENSG00000185945|	0.0122402
41-chrX-100000000-105000000	nucleobase, nucleoside, nucleotide and nucleic acid transport	ENSG00000126952|ENSG00000196970|ENSG00000147206|ENSG00000185945|	0.0246207
3-chrY-5000000-10000000	gonadal mesoderm development	ENSG00000185912|ENSG00000168692|	0.00275344
4-chrY-7500000-12500000	gonadal mesoderm development	ENSG00000185912|ENSG00000168692|	0.00202365
9-chrY-20000000-25000000	male gamete generation	ENSG00000012817|ENSG00000174622|ENSG00000169800|ENSG00000131003|	0.0129282
10-chrY-22500000-27500000	male gamete generation	ENSG00000172288|ENSG00000169800|ENSG00000131003|ENSG00000187191|	0.0129282
10-chrY-22500000-27500000	fertilization (sensu Metazoa)	ENSG00000185894|ENSG00000183795|ENSG00000183753|ENSG00000187191|	0.000245044
11-chrY-25000000-30000000	fertilization (sensu Metazoa)	ENSG00000185894|ENSG00000183795|ENSG00000187191|	0.00222256
9-chr1-20000000-25000000	complement component C1q complex	ENSG00000173369|ENSG00000173372|	0.00356531
10-chr1-22500000-27500000	complement component C1q complex	ENSG00000173369|ENSG00000173372|	0.0436545
14-chr1-32500000-37500000	connexon complex	ENSG00000188910|ENSG00000187513|ENSG00000189433|ENSG00000189280|	0.000255986
23-chr1-55000000-60000000	membrane attack complex	ENSG00000157131|ENSG00000021852|	0.000958896
44-chr1-107500000-112500000	voltage-gated potassium channel complex	ENSG00000171385|ENSG00000116396|ENSG00000143105|ENSG00000177272|ENSG00000177301|	7.06028e-12
45-chr1-110000000-115000000	voltage-gated potassium channel complex	ENSG00000171385|ENSG00000116396|ENSG00000143105|ENSG00000177272|ENSG00000177301|	1.58458e-20
59-chr1-145000000-150000000	nucleosome	ENSG00000184270|ENSG00000184678|ENSG00000182217|ENSG00000183558|ENSG00000183941|ENSG00000196890|ENSG00000183598|ENSG00000184260|	1.04442e-23
60-chr1-147500000-152500000	nucleosome	ENSG00000184270|ENSG00000184678|ENSG00000182217|ENSG00000183558|ENSG00000183941|ENSG00000196890|ENSG00000183598|ENSG00000184260|	0.0184471
62-chr1-152500000-157500000	membrane	ENSG00000132704|ENSG00000180433|ENSG00000158488|ENSG00000143603|ENSG00000143590|ENSG00000158481|ENSG00000143595|ENSG00000188340|ENSG00000158485|ENSG00000186400|ENSG00000116521|ENSG00000186306|ENSG00000158473|ENSG00000158477|ENSG00000198703|ENSG00000143622|ENSG00000197403|ENSG00000143620|ENSG00000143575|ENSG00000173285|ENSG00000160691|ENSG00000179085|ENSG00000196171|ENSG00000143630|ENSG00000163534…	0.00107335
63-chr1-155000000-160000000	membrane	ENSG00000132704|ENSG00000158869|ENSG00000180433|ENSG00000122223|ENSG00000158488|ENSG00000122224|ENSG00000158481|ENSG00000188340|ENSG00000158485|ENSG00000158731|ENSG00000162735|ENSG00000162736|ENSG00000186400|ENSG00000184155|ENSG00000162738|ENSG00000162739|ENSG00000018625|ENSG00000179914|ENSG00000117091|ENSG00000186306|ENSG00000117090|ENSG00000158850|ENSG00000158473|ENSG00000158477|ENSG00000198703…	1.41503e-14
98-chr1-242500000-247500000	membrane	ENSG00000169214|ENSG00000177186|ENSG00000177212|ENSG00000196936|ENSG00000196944|ENSG00000177476|ENSG00000177174|ENSG00000196071|ENSG00000187080|ENSG00000177489|ENSG00000196079|ENSG00000198281|ENSG00000177535|ENSG00000171180|ENSG00000196539|ENSG00000198601|ENSG00000177233|ENSG00000198118|ENSG00000183310|ENSG00000182783|ENSG00000196772|ENSG00000183130|ENSG00000197437|ENSG00000188558|ENSG00000198452…	9.23846e-18
99-chr1-245000000-250000000	membrane	ENSG00000169214|ENSG00000177186|ENSG00000177212|ENSG00000196936|ENSG00000196944|ENSG00000177476|ENSG00000177174|ENSG00000196071|ENSG00000187080|ENSG00000177489|ENSG00000196079|ENSG00000198281|ENSG00000177535|ENSG00000171180|ENSG00000196539|ENSG00000198601|ENSG00000177233|ENSG00000198118|ENSG00000183310|ENSG00000182783|ENSG00000196772|ENSG00000183130|ENSG00000197437|ENSG00000188558|ENSG00000198452…	0.00514658
45-chr2-110000000-115000000	extracellular space	ENSG00000125538|ENSG00000136696|ENSG00000136697|ENSG00000136694|ENSG00000136695|ENSG00000125571|ENSG00000115008|ENSG00000136689|ENSG00000136688|	5.84101e-05
46-chr2-112500000-117500000	extracellular space	ENSG00000125538|ENSG00000136696|ENSG00000136697|ENSG00000136694|ENSG00000136695|ENSG00000125571|ENSG00000115008|ENSG00000136689|ENSG00000136688|	0.000934132
66-chr2-162500000-167500000	voltage-gated sodium channel complex	ENSG00000144285|ENSG00000153253|ENSG00000136531|ENSG00000136546|	1.43389e-05
67-chr2-165000000-170000000	voltage-gated sodium channel complex	ENSG00000144285|ENSG00000153253|ENSG00000136531|ENSG00000136546|	2.47172e-05
15-chr3-35000000-40000000	voltage-gated sodium channel complex	ENSG00000185313|ENSG00000168356|ENSG00000183873|	0.000770249
16-chr3-37500000-42500000	voltage-gated sodium channel complex	ENSG00000185313|ENSG00000168356|ENSG00000183873|	0.0460508
29-chr4-70000000-75000000	extracellular space	ENSG00000081051|ENSG00000171201|ENSG00000145321|ENSG00000169429|ENSG00000163631|ENSG00000163739|ENSG00000079557|ENSG00000124875|	3.10427e-05
30-chr4-72500000-77500000	extracellular space	ENSG00000081051|ENSG00000109321|ENSG00000145321|ENSG00000169429|ENSG00000163631|ENSG00000124882|ENSG00000138755|ENSG00000163739|ENSG00000079557|ENSG00000163737|ENSG00000163736|ENSG00000163735|ENSG00000163734|ENSG00000124875|ENSG00000081041|ENSG00000169245|ENSG00000169248|	2.08918e-05
31-chr4-75000000-80000000	extracellular space	ENSG00000156234|ENSG00000109321|ENSG00000124882|ENSG00000138755|ENSG00000163737|ENSG00000163736|ENSG00000163735|ENSG00000163734|ENSG00000081041|ENSG00000169245|ENSG00000169248|	0.0135938
62-chr4-152500000-157500000	fibrinogen complex	ENSG00000171560|ENSG00000171564|ENSG00000171557|	4.47696e-07
63-chr4-155000000-160000000	fibrinogen complex	ENSG00000171560|ENSG00000171564|ENSG00000171557|	0.000958896
16-chr5-37500000-42500000	membrane attack complex	ENSG00000113600|ENSG00000112936|ENSG00000039537|	0.0293942
65-chr5-160000000-165000000	extracellular matrix (sensu Metazoa)	ENSG00000145863|ENSG00000145864|ENSG00000113327|ENSG00000022355|	0.0104353
10-chr6-22500000-27500000	non-membrane-bound organelle	ENSG00000187837|ENSG00000196787|ENSG00000124693|ENSG00000187475|ENSG00000168274|ENSG00000197846|ENSG00000180573|ENSG00000137259|ENSG00000196532|ENSG00000188987|ENSG00000187990|ENSG00000124635|ENSG00000182952|ENSG00000124529|ENSG00000196176|ENSG00000197459|ENSG00000164508|ENSG00000197903|ENSG00000180596|ENSG00000198366|ENSG00000124642|ENSG00000196966|ENSG00000197061|ENSG00000168242|ENSG00000198518…	4.04621e-05
10-chr6-22500000-27500000	nucleosome	ENSG00000187837|ENSG00000196787|ENSG00000124693|ENSG00000187475|ENSG00000168274|ENSG00000197846|ENSG00000180573|ENSG00000137259|ENSG00000196532|ENSG00000188987|ENSG00000187990|ENSG00000124635|ENSG00000124529|ENSG00000196176|ENSG00000197459|ENSG00000164508|ENSG00000197903|ENSG00000180596|ENSG00000198366|ENSG00000124642|ENSG00000196966|ENSG00000197061|ENSG00000168242|ENSG00000198518|ENSG00000178458…	0.015262
11-chr6-25000000-30000000	intracellular organelle	ENSG00000187837|ENSG00000196787|ENSG00000124693|ENSG00000187475|ENSG00000197279|ENSG00000197202|ENSG00000189298|ENSG00000168274|ENSG00000197153|ENSG00000197846|ENSG00000187626|ENSG00000180573|ENSG00000137259|ENSG00000196866|ENSG00000198558|ENSG00000196532|ENSG00000188987|ENSG00000187990|ENSG00000184348|ENSG00000196747|ENSG00000124635|ENSG00000196331|ENSG00000182952|ENSG00000137185|ENSG00000187987…	0.00190155
11-chr6-25000000-30000000	non-membrane-bound organelle	ENSG00000187837|ENSG00000196787|ENSG00000124693|ENSG00000187475|ENSG00000168274|ENSG00000197153|ENSG00000197846|ENSG00000180573|ENSG00000137259|ENSG00000196866|ENSG00000198558|ENSG00000196532|ENSG00000188987|ENSG00000187990|ENSG00000184348|ENSG00000196747|ENSG00000124635|ENSG00000196331|ENSG00000182952|ENSG00000197238|ENSG00000124529|ENSG00000196176|ENSG00000198374|ENSG00000197459|ENSG00000164508…	0.000105057
11-chr6-25000000-30000000	nucleosome	ENSG00000187837|ENSG00000196787|ENSG00000124693|ENSG00000187475|ENSG00000168274|ENSG00000197153|ENSG00000197846|ENSG00000180573|ENSG00000137259|ENSG00000196866|ENSG00000198558|ENSG00000196532|ENSG00000188987|ENSG00000187990|ENSG00000184348|ENSG00000196747|ENSG00000124635|ENSG00000196331|ENSG00000197238|ENSG00000124529|ENSG00000196176|ENSG00000198374|ENSG00000197459|ENSG00000164508|ENSG00000197903…	0.0238549
11-chr6-25000000-30000000	membrane-bound organelle	ENSG00000187837|ENSG00000196787|ENSG00000124693|ENSG00000187475|ENSG00000197279|ENSG00000197202|ENSG00000189298|ENSG00000168274|ENSG00000197153|ENSG00000197846|ENSG00000187626|ENSG00000180573|ENSG00000137259|ENSG00000196866|ENSG00000198558|ENSG00000196532|ENSG00000188987|ENSG00000187990|ENSG00000184348|ENSG00000196747|ENSG00000124635|ENSG00000196331|ENSG00000182952|ENSG00000137185|ENSG00000187987…	0.00276783
12-chr6-27500000-32500000	nucleosome	ENSG00000197153|ENSG00000196866|ENSG00000198558|ENSG00000184348|ENSG00000196747|ENSG00000196331|ENSG00000197238|ENSG00000198374|ENSG00000184357|ENSG00000185130|ENSG00000196374|ENSG00000197914|ENSG00000182572|ENSG00000196501|ENSG00000182611|	0.0363211
12-chr6-27500000-32500000	membrane-bound organelle	ENSG00000197279|ENSG00000197202|ENSG00000189298|ENSG00000137310|ENSG00000197153|ENSG00000187626|ENSG00000196866|ENSG00000198558|ENSG00000066379|ENSG00000184348|ENSG00000196747|ENSG00000196331|ENSG00000137185|ENSG00000137411|ENSG00000187987|ENSG00000198315|ENSG00000196812|ENSG00000197238|ENSG00000168452|ENSG00000198374|ENSG00000137404|ENSG00000184357|ENSG00000185130|ENSG00000196374|ENSG00000137337…	3.79847e-08
60-chr6-147500000-152500000	MHC protein complex	ENSG00000164520|ENSG00000111981|ENSG00000131015|ENSG00000131019|ENSG00000155918|	8.27351e-06
61-chr6-150000000-155000000	MHC protein complex	ENSG00000164520|ENSG00000111981|ENSG00000131015|ENSG00000131019|ENSG00000155918|	0.0202403
11-chr7-25000000-30000000	membrane-bound organelle	ENSG00000146592|ENSG00000005073|ENSG00000050344|ENSG00000106049|ENSG00000106031|ENSG00000105991|ENSG00000105997|ENSG00000105996|ENSG00000106038|ENSG00000122592|ENSG00000122565|ENSG00000122566|ENSG00000153814|ENSG00000078399|ENSG00000197576|ENSG00000153807|ENSG00000106004|ENSG00000106006|ENSG00000172115|ENSG00000106052|	0.0240364
8-chr9-17500000-22500000	extracellular space	ENSG00000171855|ENSG00000120235|ENSG00000188379|ENSG00000147885|ENSG00000186809|ENSG00000120247|ENSG00000186803|ENSG00000120242|ENSG00000137080|ENSG00000147877|ENSG00000177047|ENSG00000147873|ENSG00000184995|ENSG00000137026|	8.67796e-05
9-chr9-20000000-25000000	extracellular space	ENSG00000171855|ENSG00000120235|ENSG00000188379|ENSG00000147885|ENSG00000186809|ENSG00000120247|ENSG00000186803|ENSG00000120242|ENSG00000137080|ENSG00000147877|ENSG00000177047|ENSG00000147873|ENSG00000184995|ENSG00000137026|	0.00107335
2-chr11-2500000-7500000	membrane	ENSG00000184698|ENSG00000184881|ENSG00000176893|ENSG00000176895|ENSG00000167355|ENSG00000170782|ENSG00000167359|ENSG00000175609|ENSG00000180923|ENSG00000181009|ENSG00000183251|ENSG00000176787|ENSG00000176879|ENSG00000181074|ENSG00000181001|ENSG00000181609|ENSG00000187918|ENSG00000176900|ENSG00000180909|ENSG00000176904|ENSG00000176937|ENSG00000188069|ENSG00000180913|ENSG00000181963|ENSG00000180919…	0.000181252
3-chr11-5000000-10000000	membrane	ENSG00000184698|ENSG00000184881|ENSG00000167355|ENSG00000170782|ENSG00000167359|ENSG00000180923|ENSG00000181009|ENSG00000183251|ENSG00000176787|ENSG00000181074|ENSG00000181001|ENSG00000170683|ENSG00000181609|ENSG00000187918|ENSG00000180909|ENSG00000170688|ENSG00000182334|ENSG00000180913|ENSG00000180919|ENSG00000183313|ENSG00000181616|ENSG00000176748|ENSG00000180974|ENSG00000167360|ENSG00000176239…	0.00514658
20-chr11-47500000-52500000	membrane	ENSG00000086205|ENSG00000109919|ENSG00000186483|ENSG00000149177|ENSG00000176537|ENSG00000185926|ENSG00000176555|ENSG00000178306|ENSG00000176540|ENSG00000176547|ENSG00000110536|ENSG00000175619|ENSG00000109920|ENSG00000176567|ENSG00000172208|ENSG00000030066|	0.0344102
22-chr11-52500000-57500000	membrane	ENSG00000149133|ENSG00000134809|ENSG00000172459|ENSG00000172457|ENSG00000181903|ENSG00000172199|ENSG00000172489|ENSG00000172487|ENSG00000181961|ENSG00000166693|ENSG00000181689|ENSG00000172188|ENSG00000180714|ENSG00000181371|ENSG00000174942|ENSG00000186117|ENSG00000172464|ENSG00000181950|ENSG00000181693|ENSG00000184741|ENSG00000186113|ENSG00000181282|ENSG00000181698|ENSG00000172154|ENSG00000181837…	0.000268851
23-chr11-55000000-60000000	membrane	ENSG00000166928|ENSG00000172774|ENSG00000149516|ENSG00000166927|ENSG00000166926|ENSG00000156738|ENSG00000172772|ENSG00000149133|ENSG00000134809|ENSG00000172459|ENSG00000172457|ENSG00000186509|ENSG00000172289|ENSG00000172381|ENSG00000166900|ENSG00000176200|ENSG00000176205|ENSG00000181903|ENSG00000172199|ENSG00000172489|ENSG00000172487|ENSG00000166884|ENSG00000198283|ENSG00000166693|ENSG00000181689…	7.3497e-10
24-chr11-57500000-62500000	membrane	ENSG00000166959|ENSG00000166928|ENSG00000172774|ENSG00000149516|ENSG00000166927|ENSG00000166926|ENSG00000156738|ENSG00000172772|ENSG00000162188|ENSG00000186509|ENSG00000172289|ENSG00000172381|ENSG00000166900|ENSG00000176200|ENSG00000176205|ENSG00000134824|ENSG00000162144|ENSG00000110446|ENSG00000110448|ENSG00000177363|ENSG00000166884|ENSG00000198283|ENSG00000011347|ENSG00000198261|ENSG00000149541…	3.60287e-22
40-chr11-97500000-102500000	extracellular matrix (sensu Metazoa)	ENSG00000137745|ENSG00000137673|ENSG00000137675|ENSG00000137674|ENSG00000118113|ENSG00000149968|ENSG00000196611|ENSG00000166670|ENSG00000110347|	0.000287788
40-chr11-97500000-102500000	extracellular space	ENSG00000137745|ENSG00000137673|ENSG00000137674|ENSG00000118113|ENSG00000149968|ENSG00000196611|ENSG00000166670|	1.67413e-08
41-chr11-100000000-105000000	extracellular matrix (sensu Metazoa)	ENSG00000137745|ENSG00000152578|ENSG00000137673|ENSG00000137675|ENSG00000137674|ENSG00000118113|ENSG00000149968|ENSG00000196611|ENSG00000166670|ENSG00000110347|	9.81743e-05
41-chr11-100000000-105000000	extracellular space	ENSG00000137745|ENSG00000137673|ENSG00000137674|ENSG00000118113|ENSG00000149968|ENSG00000196611|ENSG00000166670|	0.00291283
49-chr11-120000000-125000000	membrane	ENSG00000181457|ENSG00000134910|ENSG00000197309|ENSG00000166250|ENSG00000166257|ENSG00000196099|ENSG00000181518|ENSG00000197849|ENSG00000064199|ENSG00000181499|ENSG00000198674|ENSG00000196661|ENSG00000173365|ENSG00000154143|ENSG00000134955|ENSG00000165478|ENSG00000196341|ENSG00000185932|ENSG00000196403|ENSG00000196248|ENSG00000196703|ENSG00000149403|ENSG00000181214|ENSG00000154134|ENSG00000154133…	7.03728e-07
50-chr11-122500000-127500000	membrane	ENSG00000181457|ENSG00000134910|ENSG00000197309|ENSG00000166257|ENSG00000149571|ENSG00000196099|ENSG00000181518|ENSG00000197849|ENSG00000064199|ENSG00000110080|ENSG00000181499|ENSG00000198674|ENSG00000150455|ENSG00000196661|ENSG00000173365|ENSG00000064309|ENSG00000154143|ENSG00000134955|ENSG00000165478|ENSG00000196341|ENSG00000196403|ENSG00000196248|ENSG00000196703|ENSG00000181214|ENSG00000154134…	0.00212215
4-chr12-7500000-12500000	membrane	ENSG00000197992|ENSG00000173342|ENSG00000172243|ENSG00000021602|ENSG00000173262|ENSG00000150045|ENSG00000134539|ENSG00000121377|ENSG00000150048|ENSG00000177575|ENSG00000198178|ENSG00000197870|ENSG00000171860|ENSG00000089818|ENSG00000059804|ENSG00000111729|ENSG00000183542|ENSG00000069493|ENSG00000070018|ENSG00000110848|ENSG00000165682|ENSG00000173391|ENSG00000139112|ENSG00000111788|ENSG00000111796…	0.0445267
20-chr12-47500000-52500000	non-membrane-bound organelle	ENSG00000185069|ENSG00000170523|ENSG00000170484|ENSG00000170486|ENSG00000135406|ENSG00000161849|ENSG00000170477|ENSG00000186081|ENSG00000123416|ENSG00000172867|ENSG00000135443|ENSG00000170423|ENSG00000135476|ENSG00000170421|ENSG00000050405|ENSG00000167553|ENSG00000167552|ENSG00000139648|ENSG00000170442|ENSG00000185479|ENSG00000172602|ENSG00000189182|ENSG00000170454|ENSG00000186442|ENSG00000167768…	0.0162331
21-chr12-50000000-55000000	non-membrane-bound organelle	ENSG00000185069|ENSG00000170523|ENSG00000170484|ENSG00000170486|ENSG00000161849|ENSG00000170477|ENSG00000186081|ENSG00000172867|ENSG00000135443|ENSG00000170423|ENSG00000135476|ENSG00000196465|ENSG00000170421|ENSG00000092841|ENSG00000139648|ENSG00000170442|ENSG00000185479|ENSG00000189182|ENSG00000170454|ENSG00000197728|ENSG00000186442|ENSG00000167768|ENSG00000186049|ENSG00000111057|ENSG00000139613…	0.0261699
7-chr13-15000000-20000000	connexon complex	ENSG00000121742|ENSG00000121743|ENSG00000165474|	0.015262
8-chr13-17500000-22500000	connexon complex	ENSG00000121742|ENSG00000121743|ENSG00000165474|	1.91718e-09
10-chr14-22500000-27500000	proteasome complex (sensu Eukaryota)	ENSG00000129543|ENSG00000100804|ENSG00000100911|ENSG00000092010|	0.0423634
4-chr17-7500000-12500000	non-membrane-bound organelle	ENSG00000006788|ENSG00000170004|ENSG00000125414|ENSG00000161970|ENSG00000183011|ENSG00000109063|ENSG00000109061|ENSG00000141048|ENSG00000141510|ENSG00000166596|ENSG00000007174|ENSG00000183914|ENSG00000133026|ENSG00000133020|	5.92449e-11
4-chr17-7500000-12500000	myosin	ENSG00000006788|ENSG00000125414|ENSG00000109063|ENSG00000109061|ENSG00000141048|ENSG00000133026|ENSG00000133020|	0.00771845
5-chr17-10000000-15000000	myosin	ENSG00000006788|ENSG00000125414|ENSG00000109063|ENSG00000109061|ENSG00000141048|ENSG00000133020|	0.0436545
12-chr17-27500000-32500000	extracellular space	ENSG00000108688|ENSG00000167236|ENSG00000161573|ENSG00000161570|ENSG00000161574|ENSG00000181374|ENSG00000172156|ENSG00000108700|ENSG00000108702|ENSG00000129277|ENSG00000108691|ENSG00000006074|ENSG00000006075|	0.00481961
14-chr17-32500000-37500000	intracellular organelle	ENSG00000094804|ENSG00000167258|ENSG00000186852|ENSG00000056661|ENSG00000125686|ENSG00000171420|ENSG00000161405|ENSG00000198249|ENSG00000186831|ENSG00000186832|ENSG00000008838|ENSG00000187272|ENSG00000180576|ENSG00000187595|ENSG00000184928|ENSG00000167916|ENSG00000108759|ENSG00000171396|ENSG00000108244|ENSG00000108753|ENSG00000006059|ENSG00000171532|ENSG00000198443|ENSG00000173805|ENSG00000186393…	0.000326677
14-chr17-32500000-37500000	intracellular	ENSG00000094804|ENSG00000167258|ENSG00000186852|ENSG00000056661|ENSG00000125686|ENSG00000171420|ENSG00000161405|ENSG00000198249|ENSG00000186831|ENSG00000186832|ENSG00000008838|ENSG00000187272|ENSG00000180576|ENSG00000187595|ENSG00000184928|ENSG00000173812|ENSG00000167916|ENSG00000108759|ENSG00000171396|ENSG00000108244|ENSG00000108753|ENSG00000006059|ENSG00000171532|ENSG00000198443|ENSG00000173805…	0.0424218
14-chr17-32500000-37500000	non-membrane-bound organelle	ENSG00000186852|ENSG00000171420|ENSG00000198249|ENSG00000186831|ENSG00000186832|ENSG00000187272|ENSG00000180576|ENSG00000184928|ENSG00000167916|ENSG00000108759|ENSG00000171396|ENSG00000108244|ENSG00000006059|ENSG00000198443|ENSG00000173805|ENSG00000186393|ENSG00000186395|ENSG00000173801|ENSG00000198271|ENSG00000073584|ENSG00000131738|ENSG00000197079|ENSG00000108298|ENSG00000002834|ENSG00000187242…	0.00592469
15-chr17-35000000-40000000	non-membrane-bound organelle	ENSG00000186852|ENSG00000171420|ENSG00000131469|ENSG00000131462|ENSG00000198249|ENSG00000186831|ENSG00000186832|ENSG00000187272|ENSG00000180576|ENSG00000184928|ENSG00000167916|ENSG00000108759|ENSG00000171396|ENSG00000108244|ENSG00000182181|ENSG00000006059|ENSG00000012048|ENSG00000198443|ENSG00000173805|ENSG00000037042|ENSG00000186393|ENSG00000186395|ENSG00000173801|ENSG00000198271|ENSG00000073584…	0.0016437
16-chr17-37500000-42500000	gamma-tubulin complex	ENSG00000131462|ENSG00000012048|ENSG00000037042|	3.01306e-06
25-chr19-60000000-65000000	intracellular organelle	ENSG00000090971|ENSG00000198046|ENSG00000152475|ENSG00000186272|ENSG00000119574|ENSG00000171425|ENSG00000083828|ENSG00000181894|ENSG00000018869|ENSG00000173480|ENSG00000197025|ENSG00000171606|ENSG00000197951|ENSG00000176293|ENSG00000121406|ENSG00000142409|ENSG00000196867|ENSG00000196263|ENSG00000121417|ENSG00000130726|ENSG00000121413|ENSG00000183647|ENSG00000083807|ENSG00000198440|ENSG00000179943…	0.0423634
25-chr19-60000000-65000000	intracellular	ENSG00000090971|ENSG00000198046|ENSG00000152475|ENSG00000186272|ENSG00000119574|ENSG00000171425|ENSG00000083828|ENSG00000181894|ENSG00000018869|ENSG00000173480|ENSG00000197025|ENSG00000171606|ENSG00000197951|ENSG00000176293|ENSG00000121406|ENSG00000142409|ENSG00000196867|ENSG00000186974|ENSG00000196263|ENSG00000121417|ENSG00000130726|ENSG00000121413|ENSG00000183647|ENSG00000083807|ENSG00000198440…	0.0148545
25-chr19-60000000-65000000	membrane-bound organelle	ENSG00000090971|ENSG00000198046|ENSG00000152475|ENSG00000186272|ENSG00000119574|ENSG00000171425|ENSG00000083828|ENSG00000181894|ENSG00000018869|ENSG00000173480|ENSG00000197025|ENSG00000171606|ENSG00000197951|ENSG00000176293|ENSG00000121406|ENSG00000142409|ENSG00000196867|ENSG00000196263|ENSG00000121417|ENSG00000130726|ENSG00000121413|ENSG00000183647|ENSG00000083807|ENSG00000198440|ENSG00000179943…	2.45549e-28
26-chr19-62500000-67500000	intracellular organelle	ENSG00000152475|ENSG00000186272|ENSG00000119574|ENSG00000083828|ENSG00000181894|ENSG00000173480|ENSG00000171606|ENSG00000176293|ENSG00000121406|ENSG00000121417|ENSG00000130726|ENSG00000121413|ENSG00000183647|ENSG00000083807|ENSG00000178935|ENSG00000152433|ENSG00000182318|ENSG00000152443|ENSG00000186230|ENSG00000180532|ENSG00000166704|ENSG00000152454|ENSG00000152467|ENSG00000099326|ENSG00000131845…	1.98233e-16
26-chr19-62500000-67500000	intracellular	ENSG00000152475|ENSG00000186272|ENSG00000119574|ENSG00000083828|ENSG00000181894|ENSG00000173480|ENSG00000171606|ENSG00000176293|ENSG00000121406|ENSG00000186974|ENSG00000121417|ENSG00000130726|ENSG00000121413|ENSG00000183647|ENSG00000083807|ENSG00000178935|ENSG00000152433|ENSG00000182318|ENSG00000152443|ENSG00000186230|ENSG00000180532|ENSG00000166704|ENSG00000152454|ENSG00000152467|ENSG00000099326…	0.00127158
26-chr19-62500000-67500000	membrane-bound organelle	ENSG00000152475|ENSG00000186272|ENSG00000119574|ENSG00000083828|ENSG00000181894|ENSG00000173480|ENSG00000171606|ENSG00000176293|ENSG00000121406|ENSG00000121417|ENSG00000130726|ENSG00000121413|ENSG00000183647|ENSG00000083807|ENSG00000178935|ENSG00000152433|ENSG00000182318|ENSG00000152443|ENSG00000186230|ENSG00000180532|ENSG00000166704|ENSG00000152454|ENSG00000152467|ENSG00000099326|ENSG00000131845…	0.0399035
40-chrX-97500000-102500000	nuclear RNA export factor complex	ENSG00000185945|ENSG00000147206|	3.49508e-35
41-chrX-100000000-105000000	nuclear RNA export factor complex	ENSG00000185945|ENSG00000147206|	5.52212e-50
9-chr1-20000000-25000000	complement component C1q complex	ENSG00000173369|ENSG00000173372|	9.86273e-10
23-chr1-55000000-60000000	membrane attack complex	ENSG00000157131|ENSG00000021852|	0.000575269
63-chr1-155000000-160000000	intrinsic to membrane	ENSG00000132704|ENSG00000158869|ENSG00000180433|ENSG00000122223|ENSG00000158488|ENSG00000122224|ENSG00000158481|ENSG00000188340|ENSG00000158485|ENSG00000158731|ENSG00000162735|ENSG00000162736|ENSG00000186400|ENSG00000184155|ENSG00000162738|ENSG00000162739|ENSG00000018625|ENSG00000117091|ENSG00000186306|ENSG00000117090|ENSG00000158850|ENSG00000158473|ENSG00000158477|ENSG00000198703|ENSG00000197403…	5.91753e-10
98-chr1-242500000-247500000	intrinsic to membrane	ENSG00000169214|ENSG00000177186|ENSG00000177212|ENSG00000196936|ENSG00000196944|ENSG00000177476|ENSG00000177174|ENSG00000196071|ENSG00000187080|ENSG00000177489|ENSG00000196079|ENSG00000198281|ENSG00000177535|ENSG00000171180|ENSG00000196539|ENSG00000198601|ENSG00000198118|ENSG00000183310|ENSG00000182783|ENSG00000183130|ENSG00000188558|ENSG00000197454|ENSG00000197591|ENSG00000153230|ENSG00000184022…	7.24747e-08
99-chr1-245000000-250000000	intrinsic to membrane	ENSG00000169214|ENSG00000177186|ENSG00000177212|ENSG00000196936|ENSG00000196944|ENSG00000177476|ENSG00000177174|ENSG00000196071|ENSG00000187080|ENSG00000177489|ENSG00000196079|ENSG00000198281|ENSG00000177535|ENSG00000171180|ENSG00000196539|ENSG00000198601|ENSG00000198118|ENSG00000183310|ENSG00000182783|ENSG00000183130|ENSG00000188558|ENSG00000197454|ENSG00000197591|ENSG00000153230|ENSG00000184022…	7.60212e-06
18-chr4-42500000-47500000	postsynaptic membrane	ENSG00000163285|ENSG00000163288|ENSG00000109158|ENSG00000151834|	1.58458e-20
18-chr4-42500000-47500000	synapse	ENSG00000163285|ENSG00000163288|ENSG00000109158|ENSG00000151834|	1.77204e-06
19-chr4-45000000-50000000	postsynaptic membrane	ENSG00000163285|ENSG00000163288|ENSG00000109158|ENSG00000151834|	3.19071e-06
19-chr4-45000000-50000000	synapse	ENSG00000163285|ENSG00000163288|ENSG00000109158|ENSG00000151834|	8.19732e-07
28-chr4-67500000-72500000	membrane fraction	ENSG00000171234|ENSG00000135226|ENSG00000198277|ENSG00000197592|ENSG00000173610|ENSG00000109181|ENSG00000156096|ENSG00000197888|	0.00570356
62-chr4-152500000-157500000	guanylate cyclase complex, soluble	ENSG00000164116|ENSG00000061918|	0.0127996
62-chr4-152500000-157500000	fibrinogen complex	ENSG00000171560|ENSG00000171564|ENSG00000171557|	0.0111871
63-chr4-155000000-160000000	guanylate cyclase complex, soluble	ENSG00000164116|ENSG00000061918|	0.0384416
63-chr4-155000000-160000000	fibrinogen complex	ENSG00000171560|ENSG00000171564|ENSG00000171557|	3.67912e-09
16-chr5-37500000-42500000	membrane attack complex	ENSG00000113600|ENSG00000112936|ENSG00000039537|	1.97975e-06
64-chr5-157500000-162500000	postsynaptic membrane	ENSG00000145863|ENSG00000145864|ENSG00000113327|ENSG00000022355|	2.27284e-08
64-chr5-157500000-162500000	synapse	ENSG00000145863|ENSG00000145864|ENSG00000113327|ENSG00000022355|	7.3497e-10
65-chr5-160000000-165000000	postsynaptic membrane	ENSG00000145863|ENSG00000145864|ENSG00000113327|ENSG00000022355|	0.000613312
65-chr5-160000000-165000000	synapse	ENSG00000145863|ENSG00000145864|ENSG00000113327|ENSG00000022355|	0.0291973
10-chr6-22500000-27500000	nucleus	ENSG00000187837|ENSG00000196787|ENSG00000124693|ENSG00000187475|ENSG00000168274|ENSG00000197846|ENSG00000180573|ENSG00000137259|ENSG00000196532|ENSG00000188987|ENSG00000187990|ENSG00000124635|ENSG00000182952|ENSG00000196176|ENSG00000146109|ENSG00000197459|ENSG00000164508|ENSG00000197903|ENSG00000181315|ENSG00000180596|ENSG00000198366|ENSG00000124642|ENSG00000196966|ENSG00000197061|ENSG00000111802…	0.0399035
10-chr6-22500000-27500000	chromosome	ENSG00000187837|ENSG00000196787|ENSG00000124693|ENSG00000187475|ENSG00000168274|ENSG00000197846|ENSG00000180573|ENSG00000137259|ENSG00000196532|ENSG00000188987|ENSG00000187990|ENSG00000124635|ENSG00000182952|ENSG00000196176|ENSG00000197459|ENSG00000164508|ENSG00000197903|ENSG00000180596|ENSG00000198366|ENSG00000124642|ENSG00000196966|ENSG00000197061|ENSG00000168242|ENSG00000198518|ENSG00000178458…	0.0220923
10-chr6-22500000-27500000	intracellular non-membrane-bound organelle	ENSG00000187837|ENSG00000196787|ENSG00000124693|ENSG00000187475|ENSG00000168274|ENSG00000197846|ENSG00000180573|ENSG00000137259|ENSG00000196532|ENSG00000188987|ENSG00000187990|ENSG00000124635|ENSG00000182952|ENSG00000196176|ENSG00000197459|ENSG00000164508|ENSG00000197903|ENSG00000180596|ENSG00000198366|ENSG00000124642|ENSG00000196966|ENSG00000197061|ENSG00000168242|ENSG00000198518|ENSG00000178458…	1.39626e-06
11-chr6-25000000-30000000	intracellular membrane-bound organelle	ENSG00000187837|ENSG00000196787|ENSG00000124693|ENSG00000187475|ENSG00000197279|ENSG00000197202|ENSG00000189298|ENSG00000168274|ENSG00000197153|ENSG00000197846|ENSG00000187626|ENSG00000180573|ENSG00000137259|ENSG00000196866|ENSG00000198558|ENSG00000196532|ENSG00000188987|ENSG00000187990|ENSG00000184348|ENSG00000196747|ENSG00000124635|ENSG00000182952|ENSG00000198315|ENSG00000196176|ENSG00000146109…	3.32183e-08
11-chr6-25000000-30000000	nucleus	ENSG00000187837|ENSG00000196787|ENSG00000124693|ENSG00000187475|ENSG00000197279|ENSG00000197202|ENSG00000189298|ENSG00000168274|ENSG00000197153|ENSG00000197846|ENSG00000187626|ENSG00000180573|ENSG00000137259|ENSG00000196866|ENSG00000198558|ENSG00000196532|ENSG00000188987|ENSG00000187990|ENSG00000184348|ENSG00000196747|ENSG00000124635|ENSG00000182952|ENSG00000198315|ENSG00000196176|ENSG00000146109…	1.82093e-06
11-chr6-25000000-30000000	chromosome	ENSG00000187837|ENSG00000196787|ENSG00000124693|ENSG00000187475|ENSG00000168274|ENSG00000197153|ENSG00000197846|ENSG00000180573|ENSG00000137259|ENSG00000196866|ENSG00000198558|ENSG00000196532|ENSG00000188987|ENSG00000187990|ENSG00000184348|ENSG00000196747|ENSG00000124635|ENSG00000182952|ENSG00000196176|ENSG00000197459|ENSG00000164508|ENSG00000197903|ENSG00000184357|ENSG00000185130|ENSG00000180596…	0.00773992
11-chr6-25000000-30000000	intracellular non-membrane-bound organelle	ENSG00000187837|ENSG00000196787|ENSG00000124693|ENSG00000187475|ENSG00000168274|ENSG00000197153|ENSG00000197846|ENSG00000180573|ENSG00000137259|ENSG00000196866|ENSG00000198558|ENSG00000196532|ENSG00000188987|ENSG00000187990|ENSG00000184348|ENSG00000196747|ENSG00000124635|ENSG00000182952|ENSG00000196176|ENSG00000197459|ENSG00000164508|ENSG00000197903|ENSG00000184357|ENSG00000185130|ENSG00000180596…	2.57829e-06
12-chr6-27500000-32500000	nucleus	ENSG00000197279|ENSG00000197202|ENSG00000189298|ENSG00000137310|ENSG00000197153|ENSG00000187626|ENSG00000196866|ENSG00000198558|ENSG00000066379|ENSG00000184348|ENSG00000196747|ENSG00000137411|ENSG00000198315|ENSG00000137404|ENSG00000184357|ENSG00000185130|ENSG00000196374|ENSG00000137337|ENSG00000197062|ENSG00000137338|ENSG00000197914|ENSG00000198563|ENSG00000197657|ENSG00000182572|ENSG00000158691…	0.0207958
12-chr6-27500000-32500000	chromosome	ENSG00000197153|ENSG00000196866|ENSG00000198558|ENSG00000184348|ENSG00000196747|ENSG00000184357|ENSG00000185130|ENSG00000196374|ENSG00000197914|ENSG00000182572|ENSG00000196501|ENSG00000182611|ENSG00000196331|ENSG00000197238|ENSG00000198374|	2.57816e-07
60-chr6-147500000-152500000	MHC class I protein complex	ENSG00000164520|ENSG00000111981|ENSG00000131015|ENSG00000131019|ENSG00000155918|	0.0261845
61-chr6-150000000-155000000	MHC class I protein complex	ENSG00000164520|ENSG00000111981|ENSG00000131015|ENSG00000131019|ENSG00000155918|	0.0363211
11-chr7-25000000-30000000	intracellular membrane-bound organelle	ENSG00000146592|ENSG00000005073|ENSG00000050344|ENSG00000106049|ENSG00000106031|ENSG00000105991|ENSG00000105997|ENSG00000105996|ENSG00000106038|ENSG00000122565|ENSG00000122566|ENSG00000153814|ENSG00000078399|ENSG00000197576|ENSG00000153807|ENSG00000106004|ENSG00000106006|ENSG00000172115|ENSG00000106052|ENSG00000122592|	0.028215
11-chr7-25000000-30000000	nucleus	ENSG00000146592|ENSG00000005073|ENSG00000050344|ENSG00000106031|ENSG00000105991|ENSG00000105997|ENSG00000105996|ENSG00000106038|ENSG00000122565|ENSG00000122566|ENSG00000153814|ENSG00000078399|ENSG00000197576|ENSG00000153807|ENSG00000106004|ENSG00000106006|ENSG00000106052|ENSG00000122592|	0.000178364
57-chr7-140000000-145000000	intrinsic to membrane	ENSG00000197993|ENSG00000159840|ENSG00000185899|ENSG00000127364|ENSG00000127366|ENSG00000127362|ENSG00000127412|ENSG00000090269|ENSG00000188037|ENSG00000183122|ENSG00000170356|ENSG00000183609|ENSG00000165125|ENSG00000179420|ENSG00000106123|ENSG00000173525|ENSG00000176510|ENSG00000146904|ENSG00000179087|ENSG00000179468|	2.64347e-05
18-chr8-42500000-47500000	nicotinic acetylcholine-gated receptor-channel complex	ENSG00000147434|ENSG00000147432|	0.0363211
2-chr11-2500000-7500000	intrinsic to membrane	ENSG00000184698|ENSG00000184881|ENSG00000176893|ENSG00000176895|ENSG00000167355|ENSG00000170782|ENSG00000167359|ENSG00000175609|ENSG00000180923|ENSG00000181009|ENSG00000183251|ENSG00000176787|ENSG00000176879|ENSG00000181074|ENSG00000181001|ENSG00000181609|ENSG00000187918|ENSG00000176900|ENSG00000180909|ENSG00000176904|ENSG00000176937|ENSG00000188069|ENSG00000180913|ENSG00000180919|ENSG00000197790…	0.0384416
3-chr11-5000000-10000000	intrinsic to membrane	ENSG00000184698|ENSG00000184881|ENSG00000167355|ENSG00000170782|ENSG00000167359|ENSG00000180923|ENSG00000181009|ENSG00000183251|ENSG00000176787|ENSG00000181074|ENSG00000181001|ENSG00000170683|ENSG00000181609|ENSG00000187918|ENSG00000180909|ENSG00000170688|ENSG00000182334|ENSG00000180913|ENSG00000180919|ENSG00000183313|ENSG00000181616|ENSG00000176748|ENSG00000167360|ENSG00000176239|ENSG00000184933…	0.0270324
22-chr11-52500000-57500000	intrinsic to membrane	ENSG00000149133|ENSG00000172459|ENSG00000172457|ENSG00000181903|ENSG00000172199|ENSG00000172489|ENSG00000172487|ENSG00000166693|ENSG00000181689|ENSG00000172188|ENSG00000181950|ENSG00000184741|ENSG00000181837|ENSG00000181958|ENSG00000174937|ENSG00000181296|ENSG00000181943|ENSG00000198877|ENSG00000186124|ENSG00000181939|ENSG00000185701|ENSG00000181723|ENSG00000167822|ENSG00000150269|ENSG00000181927…	0.024997
23-chr11-55000000-60000000	intrinsic to membrane	ENSG00000166928|ENSG00000172774|ENSG00000149516|ENSG00000166927|ENSG00000166926|ENSG00000156738|ENSG00000172772|ENSG00000149133|ENSG00000172459|ENSG00000172457|ENSG00000186509|ENSG00000172289|ENSG00000172381|ENSG00000166900|ENSG00000176200|ENSG00000176205|ENSG00000181903|ENSG00000172199|ENSG00000172489|ENSG00000172487|ENSG00000166884|ENSG00000198283|ENSG00000166693|ENSG00000181689|ENSG00000172188…	2.20041e-09
24-chr11-57500000-62500000	intrinsic to membrane	ENSG00000166959|ENSG00000166928|ENSG00000172774|ENSG00000149516|ENSG00000166927|ENSG00000166926|ENSG00000156738|ENSG00000172772|ENSG00000186509|ENSG00000172289|ENSG00000172381|ENSG00000166900|ENSG00000176200|ENSG00000176205|ENSG00000134824|ENSG00000162144|ENSG00000110448|ENSG00000177363|ENSG00000166884|ENSG00000198283|ENSG00000011347|ENSG00000149541|ENSG00000149534|ENSG00000168539|ENSG00000180475…	0.000111564
47-chr11-115000000-120000000	T cell receptor complex	ENSG00000167286|ENSG00000160654|ENSG00000198851|	0.0143681
48-chr11-117500000-122500000	T cell receptor complex	ENSG00000167286|ENSG00000160654|ENSG00000198851|	0.0082659
49-chr11-120000000-125000000	intrinsic to membrane	ENSG00000181457|ENSG00000134910|ENSG00000197309|ENSG00000166250|ENSG00000166257|ENSG00000196099|ENSG00000181518|ENSG00000197849|ENSG00000181499|ENSG00000198674|ENSG00000196661|ENSG00000173365|ENSG00000165478|ENSG00000196341|ENSG00000196403|ENSG00000196248|ENSG00000196703|ENSG00000149403|ENSG00000181214|ENSG00000154134|ENSG00000154133|ENSG00000171014|ENSG00000182634|ENSG00000137642|ENSG00000186268…	0.0344689
50-chr11-122500000-127500000	intrinsic to membrane	ENSG00000181457|ENSG00000134910|ENSG00000197309|ENSG00000166257|ENSG00000149571|ENSG00000196099|ENSG00000181518|ENSG00000197849|ENSG00000110080|ENSG00000181499|ENSG00000198674|ENSG00000196661|ENSG00000173365|ENSG00000165478|ENSG00000196341|ENSG00000196403|ENSG00000196248|ENSG00000196703|ENSG00000181214|ENSG00000154134|ENSG00000154133|ENSG00000171014|ENSG00000182634|ENSG00000186268|ENSG00000198657…	0.0306322
53-chr11-130000000-135000000	beta-galactosidase complex	ENSG00000166105|ENSG00000149328|	0.00768009
54-chr11-132500000-137500000	beta-galactosidase complex	ENSG00000166105|ENSG00000149328|	0.0210132
4-chr12-7500000-12500000	intrinsic to membrane	ENSG00000197992|ENSG00000173342|ENSG00000172243|ENSG00000173262|ENSG00000150045|ENSG00000134539|ENSG00000121377|ENSG00000150048|ENSG00000177575|ENSG00000198178|ENSG00000197870|ENSG00000171860|ENSG00000183542|ENSG00000069493|ENSG00000070018|ENSG00000110848|ENSG00000165682|ENSG00000173391|ENSG00000111788|ENSG00000003056|ENSG00000134551|ENSG00000060140|ENSG00000186136|ENSG00000110852|ENSG00000134545…	0.000613312
20-chr12-47500000-52500000	cytoskeleton	ENSG00000185069|ENSG00000170523|ENSG00000170484|ENSG00000170486|ENSG00000135406|ENSG00000161849|ENSG00000170477|ENSG00000186081|ENSG00000123416|ENSG00000172867|ENSG00000135443|ENSG00000170423|ENSG00000170421|ENSG00000139648|ENSG00000170442|ENSG00000185479|ENSG00000172602|ENSG00000189182|ENSG00000170454|ENSG00000186442|ENSG00000167768|ENSG00000186049|ENSG00000111057|ENSG00000170465|ENSG00000135480…	0.000133109
20-chr12-47500000-52500000	intracellular non-membrane-bound organelle	ENSG00000185069|ENSG00000170523|ENSG00000170484|ENSG00000170486|ENSG00000135406|ENSG00000161849|ENSG00000170477|ENSG00000186081|ENSG00000123416|ENSG00000172867|ENSG00000135443|ENSG00000170423|ENSG00000170421|ENSG00000139648|ENSG00000170442|ENSG00000185479|ENSG00000172602|ENSG00000189182|ENSG00000170454|ENSG00000186442|ENSG00000167768|ENSG00000186049|ENSG00000111057|ENSG00000170465|ENSG00000135480…	0.00356531
21-chr12-50000000-55000000	cytoskeleton	ENSG00000185069|ENSG00000170523|ENSG00000170484|ENSG00000170486|ENSG00000161849|ENSG00000170477|ENSG00000186081|ENSG00000172867|ENSG00000135443|ENSG00000170423|ENSG00000170421|ENSG00000092841|ENSG00000139648|ENSG00000170442|ENSG00000185479|ENSG00000189182|ENSG00000170454|ENSG00000186442|ENSG00000167768|ENSG00000186049|ENSG00000111057|ENSG00000170465|ENSG00000135480|ENSG00000185640|ENSG00000161850…	0.000985106
21-chr12-50000000-55000000	intracellular non-membrane-bound organelle	ENSG00000185069|ENSG00000170523|ENSG00000170484|ENSG00000170486|ENSG00000161849|ENSG00000170477|ENSG00000186081|ENSG00000172867|ENSG00000135443|ENSG00000170423|ENSG00000170421|ENSG00000092841|ENSG00000139648|ENSG00000170442|ENSG00000185479|ENSG00000189182|ENSG00000170454|ENSG00000197728|ENSG00000186442|ENSG00000167768|ENSG00000186049|ENSG00000111057|ENSG00000139613|ENSG00000094916|ENSG00000170465…	0.004873
7-chr14-15000000-20000000	intrinsic to membrane	ENSG00000169484|ENSG00000169488|ENSG00000176299|ENSG00000176294|ENSG00000182652|ENSG00000176230|ENSG00000176246|ENSG00000155249|ENSG00000176198|ENSG00000196832|ENSG00000186445|ENSG00000165782|ENSG00000176281|ENSG00000196143|ENSG00000165762|ENSG00000176312|ENSG00000184394|ENSG00000176213|ENSG00000176219|ENSG00000176253|	0.0421618
8-chr14-17500000-22500000	intrinsic to membrane	ENSG00000157227|ENSG00000181803|ENSG00000169484|ENSG00000169488|ENSG00000129562|ENSG00000176299|ENSG00000176294|ENSG00000092217|ENSG00000197324|ENSG00000182652|ENSG00000176230|ENSG00000176246|ENSG00000155249|ENSG00000165794|ENSG00000176198|ENSG00000169208|ENSG00000196832|ENSG00000186445|ENSG00000165782|ENSG00000169202|ENSG00000176281|ENSG00000155465|ENSG00000196143|ENSG00000155463|ENSG00000165762…	0.028215
10-chr14-22500000-27500000	proteasome complex (sensu Eukaryota)	ENSG00000129543|ENSG00000100804|ENSG00000100911|ENSG00000092010|	0.000934132
30-chr15-72500000-77500000	nicotinic acetylcholine-gated receptor-channel complex	ENSG00000117971|ENSG00000169684|ENSG00000080644|	1.74657e-16
31-chr15-75000000-80000000	nicotinic acetylcholine-gated receptor-channel complex	ENSG00000117971|ENSG00000169684|ENSG00000080644|	9.57471e-12
13-chr16-30000000-35000000	integrin complex	ENSG00000140678|ENSG00000156886|ENSG00000169896|ENSG00000005844|	0.0130851
4-chr17-7500000-12500000	myosin II	ENSG00000006788|ENSG00000125414|ENSG00000109061|ENSG00000133020|ENSG00000141048|	4.20146e-20
4-chr17-7500000-12500000	intracellular non-membrane-bound organelle	ENSG00000006788|ENSG00000170004|ENSG00000125414|ENSG00000161970|ENSG00000109063|ENSG00000109061|ENSG00000141510|ENSG00000166596|ENSG00000007174|ENSG00000183914|ENSG00000133026|ENSG00000133020|ENSG00000183011|ENSG00000141048|	1.18517e-14
5-chr17-10000000-15000000	myosin II	ENSG00000006788|ENSG00000125414|ENSG00000109061|ENSG00000133020|ENSG00000141048|	7.15595e-09
14-chr17-32500000-37500000	intracellular organelle	ENSG00000094804|ENSG00000167258|ENSG00000186852|ENSG00000056661|ENSG00000125686|ENSG00000171420|ENSG00000161405|ENSG00000198249|ENSG00000186831|ENSG00000186832|ENSG00000008838|ENSG00000187272|ENSG00000180576|ENSG00000187595|ENSG00000171396|ENSG00000108244|ENSG00000006059|ENSG00000198443|ENSG00000198271|ENSG00000141720|ENSG00000131738|ENSG00000197079|ENSG00000108298|ENSG00000141756|ENSG00000002834…	7.15595e-09
14-chr17-32500000-37500000	cytoskeleton	ENSG00000186852|ENSG00000171420|ENSG00000198249|ENSG00000186831|ENSG00000186832|ENSG00000187272|ENSG00000180576|ENSG00000171396|ENSG00000108244|ENSG00000006059|ENSG00000198443|ENSG00000198271|ENSG00000131738|ENSG00000197079|ENSG00000002834|ENSG00000187242|ENSG00000126337|ENSG00000131737|ENSG00000171345|ENSG00000171346|ENSG00000196156|ENSG00000171403|ENSG00000171401|ENSG00000094796|ENSG00000186860…	0.000268851
14-chr17-32500000-37500000	intracellular non-membrane-bound organelle	ENSG00000186852|ENSG00000171420|ENSG00000198249|ENSG00000186831|ENSG00000186832|ENSG00000187272|ENSG00000180576|ENSG00000171396|ENSG00000108244|ENSG00000006059|ENSG00000198443|ENSG00000198271|ENSG00000131738|ENSG00000197079|ENSG00000108298|ENSG00000002834|ENSG00000187242|ENSG00000126337|ENSG00000131737|ENSG00000171345|ENSG00000171346|ENSG00000196156|ENSG00000171403|ENSG00000171401|ENSG00000094796…	0.00031986
15-chr17-35000000-40000000	cytoskeleton	ENSG00000186852|ENSG00000171420|ENSG00000131462|ENSG00000198249|ENSG00000186831|ENSG00000186832|ENSG00000187272|ENSG00000180576|ENSG00000171396|ENSG00000108244|ENSG00000006059|ENSG00000198443|ENSG00000037042|ENSG00000198271|ENSG00000131738|ENSG00000197079|ENSG00000187242|ENSG00000126337|ENSG00000131737|ENSG00000171345|ENSG00000171346|ENSG00000196156|ENSG00000171403|ENSG00000171401|ENSG00000094796…	1.5109e-08
15-chr17-35000000-40000000	intracellular non-membrane-bound organelle	ENSG00000186852|ENSG00000171420|ENSG00000131469|ENSG00000131462|ENSG00000198249|ENSG00000186831|ENSG00000186832|ENSG00000187272|ENSG00000180576|ENSG00000171396|ENSG00000108244|ENSG00000006059|ENSG00000198443|ENSG00000037042|ENSG00000198271|ENSG00000131738|ENSG00000197079|ENSG00000187242|ENSG00000126337|ENSG00000131737|ENSG00000171345|ENSG00000171346|ENSG00000196156|ENSG00000171403|ENSG00000171401…	3.06308e-08
10-chr18-22500000-27500000	cytoskeleton	ENSG00000175065|ENSG00000134760|ENSG00000134762|ENSG00000134765|ENSG00000046604|ENSG00000134755|ENSG00000134757|	0.0325249
11-chr18-25000000-30000000	cytoskeleton	ENSG00000175065|ENSG00000134760|ENSG00000134762|ENSG00000134765|ENSG00000046604|ENSG00000134755|ENSG00000134757|	0.00965789
9-chr19-20000000-25000000	nucleus	ENSG00000197020|ENSG00000167232|ENSG00000198521|ENSG00000104777|ENSG00000196268|ENSG00000196172|ENSG00000196350|ENSG00000197360|ENSG00000160352|ENSG00000183850|ENSG00000105750|ENSG00000197372|ENSG00000196705|ENSG00000160229|ENSG00000196686|ENSG00000118620|ENSG00000197134|	6.4017e-05
17-chr19-40000000-45000000	nucleus	ENSG00000128011|ENSG00000161298|ENSG00000128016|ENSG00000142065|ENSG00000104824|ENSG00000104825|ENSG00000196235|ENSG00000181007|ENSG00000105261|ENSG00000179168|ENSG00000178982|ENSG00000186017|ENSG00000196437|ENSG00000011332|ENSG00000198182|ENSG00000171817|ENSG00000181666|ENSG00000105698|ENSG00000189144|ENSG00000180479|ENSG00000178934|ENSG00000196357|ENSG00000189042|ENSG00000105258|ENSG00000197800…	0.000682582
25-chr19-60000000-65000000	intracellular membrane-bound organelle	ENSG00000090971|ENSG00000198046|ENSG00000152475|ENSG00000186272|ENSG00000119574|ENSG00000171425|ENSG00000083828|ENSG00000181894|ENSG00000018869|ENSG00000173480|ENSG00000197025|ENSG00000171606|ENSG00000197951|ENSG00000176293|ENSG00000121406|ENSG00000142409|ENSG00000196867|ENSG00000196263|ENSG00000121417|ENSG00000130726|ENSG00000121413|ENSG00000198440|ENSG00000178935|ENSG00000186230|ENSG00000180532…	0.00072593
25-chr19-60000000-65000000	intracellular organelle	ENSG00000090971|ENSG00000198046|ENSG00000152475|ENSG00000186272|ENSG00000119574|ENSG00000171425|ENSG00000083828|ENSG00000181894|ENSG00000018869|ENSG00000173480|ENSG00000197025|ENSG00000171606|ENSG00000197951|ENSG00000176293|ENSG00000121406|ENSG00000142409|ENSG00000196867|ENSG00000196263|ENSG00000121417|ENSG00000130726|ENSG00000121413|ENSG00000198440|ENSG00000178935|ENSG00000186230|ENSG00000180532…	0.0012798
25-chr19-60000000-65000000	nucleus	ENSG00000090971|ENSG00000198046|ENSG00000152475|ENSG00000186272|ENSG00000119574|ENSG00000171425|ENSG00000083828|ENSG00000181894|ENSG00000018869|ENSG00000173480|ENSG00000197025|ENSG00000171606|ENSG00000197951|ENSG00000176293|ENSG00000121406|ENSG00000142409|ENSG00000196867|ENSG00000196263|ENSG00000121417|ENSG00000130726|ENSG00000121413|ENSG00000198440|ENSG00000178935|ENSG00000186230|ENSG00000180532…	0.00810559
26-chr19-62500000-67500000	intracellular membrane-bound organelle	ENSG00000152475|ENSG00000186272|ENSG00000119574|ENSG00000083828|ENSG00000181894|ENSG00000173480|ENSG00000171606|ENSG00000176293|ENSG00000121406|ENSG00000121417|ENSG00000130726|ENSG00000121413|ENSG00000178935|ENSG00000186230|ENSG00000180532|ENSG00000166704|ENSG00000152454|ENSG00000152467|ENSG00000099326|ENSG00000131845|ENSG00000131849|ENSG00000105132|ENSG00000198131|ENSG00000105136|ENSG00000083842…	0.0149663
26-chr19-62500000-67500000	intracellular organelle	ENSG00000152475|ENSG00000186272|ENSG00000119574|ENSG00000083828|ENSG00000181894|ENSG00000173480|ENSG00000171606|ENSG00000176293|ENSG00000121406|ENSG00000121417|ENSG00000130726|ENSG00000121413|ENSG00000178935|ENSG00000186230|ENSG00000180532|ENSG00000166704|ENSG00000152454|ENSG00000152467|ENSG00000099326|ENSG00000131845|ENSG00000131849|ENSG00000105132|ENSG00000175487|ENSG00000198131|ENSG00000105136…	0.000668146
26-chr19-62500000-67500000	nucleus	ENSG00000152475|ENSG00000186272|ENSG00000119574|ENSG00000083828|ENSG00000181894|ENSG00000173480|ENSG00000171606|ENSG00000176293|ENSG00000121406|ENSG00000121417|ENSG00000130726|ENSG00000121413|ENSG00000178935|ENSG00000186230|ENSG00000180532|ENSG00000166704|ENSG00000152454|ENSG00000152467|ENSG00000099326|ENSG00000131845|ENSG00000131849|ENSG00000105132|ENSG00000198131|ENSG00000105136|ENSG00000083842…	0.0012798
17-chr21-40000000-45000000	preribosome	ENSG00000160214|ENSG00000160208|	6.05286e-05
18-chr21-42500000-47500000	preribosome	ENSG00000160214|ENSG00000160208|	1.3323e-05
19-chr21-45000000-50000000	collagen	ENSG00000142173|ENSG00000182871|ENSG00000142156|	0.0327879
63-chr1-155000000-160000000	integral to membrane	ENSG00000143297|ENSG00000026751|ENSG00000132704|ENSG00000143226|ENSG00000180409|ENSG00000158869|ENSG00000180433|ENSG00000122223|ENSG00000158488|ENSG00000122224|ENSG00000158481|ENSG00000188340|ENSG00000162729|ENSG00000158485|ENSG00000198400|ENSG00000162728|ENSG00000027644|ENSG00000196184|ENSG00000158731|ENSG00000162735|ENSG00000162736|ENSG00000186400|ENSG00000184155|ENSG00000197532|ENSG00000143252…	0.0247439
67-chr1-165000000-170000000	vesicular fraction	ENSG00000117507|ENSG00000076258|ENSG00000094963|ENSG00000007933|ENSG00000010932|	0.0133228
68-chr1-167500000-172500000	vesicular fraction	ENSG00000117507|ENSG00000076258|ENSG00000094963|ENSG00000007933|ENSG00000010932|	0.032033
80-chr1-197500000-202500000	contractile fiber	ENSG00000163395|ENSG00000159173|ENSG00000133055|ENSG00000118194|	3.89108e-05
98-chr1-242500000-247500000	integral to membrane	ENSG00000175143|ENSG00000198128|ENSG00000177275|ENSG00000169214|ENSG00000162727|ENSG00000187701|ENSG00000177186|ENSG00000177212|ENSG00000196936|ENSG00000196944|ENSG00000198452|ENSG00000177201|ENSG00000175180|ENSG00000177476|ENSG00000177174|ENSG00000197454|ENSG00000197591|ENSG00000196071|ENSG00000153230|ENSG00000184022|ENSG00000187080|ENSG00000177151|ENSG00000177489|ENSG00000196079|ENSG00000196242…	0.00157604
99-chr1-245000000-250000000	integral to membrane	ENSG00000175143|ENSG00000198128|ENSG00000177275|ENSG00000169214|ENSG00000162727|ENSG00000187701|ENSG00000177186|ENSG00000177212|ENSG00000196936|ENSG00000196944|ENSG00000198452|ENSG00000177201|ENSG00000175180|ENSG00000177476|ENSG00000177174|ENSG00000197454|ENSG00000197591|ENSG00000196071|ENSG00000153230|ENSG00000184022|ENSG00000187080|ENSG00000177151|ENSG00000177489|ENSG00000196079|ENSG00000196242…	1.01734e-05
18-chr4-42500000-47500000	postsynaptic membrane	ENSG00000163285|ENSG00000109158|ENSG00000163288|ENSG00000151834|	0.0121895
19-chr4-45000000-50000000	postsynaptic membrane	ENSG00000163285|ENSG00000109158|ENSG00000163288|ENSG00000151834|	0.016569
27-chr4-65000000-70000000	vesicular fraction	ENSG00000171234|ENSG00000197592|ENSG00000109181|ENSG00000197888|ENSG00000198277|	0.0139204
28-chr4-67500000-72500000	endoplasmic reticulum	ENSG00000171234|ENSG00000197592|ENSG00000173610|ENSG00000109181|ENSG00000156096|ENSG00000135226|ENSG00000197888|ENSG00000198277|	0.0189838
28-chr4-67500000-72500000	vesicular fraction	ENSG00000171234|ENSG00000197592|ENSG00000173610|ENSG00000109181|ENSG00000156096|ENSG00000135226|ENSG00000197888|ENSG00000198277|	1.35392e-23
64-chr5-157500000-162500000	postsynaptic membrane	ENSG00000022355|ENSG00000145863|ENSG00000145864|ENSG00000113327|	7.14713e-27
65-chr5-160000000-165000000	postsynaptic membrane	ENSG00000022355|ENSG00000145863|ENSG00000145864|ENSG00000113327|	0.0082849
10-chr6-22500000-27500000	nucleus	ENSG00000168242|ENSG00000187837|ENSG00000198518|ENSG00000178458|ENSG00000196787|ENSG00000196226|ENSG00000124693|ENSG00000187475|ENSG00000124610|ENSG00000124613|ENSG00000184825|ENSG00000112727|ENSG00000158403|ENSG00000197697|ENSG00000146109|ENSG00000197459|ENSG00000124578|ENSG00000158406|ENSG00000164508|ENSG00000197903|ENSG00000124575|ENSG00000168298|ENSG00000168274|ENSG00000181315|ENSG00000197846…	0.000861995
10-chr6-22500000-27500000	chromosome	ENSG00000168242|ENSG00000187837|ENSG00000198518|ENSG00000178458|ENSG00000196787|ENSG00000196226|ENSG00000124693|ENSG00000187475|ENSG00000124610|ENSG00000184825|ENSG00000112727|ENSG00000158403|ENSG00000197697|ENSG00000197459|ENSG00000124578|ENSG00000158406|ENSG00000164508|ENSG00000197903|ENSG00000124575|ENSG00000168298|ENSG00000168274|ENSG00000197846|ENSG00000198339|ENSG00000180596|ENSG00000198366…	0.00050761
11-chr6-25000000-30000000	nucleus	ENSG00000168242|ENSG00000187837|ENSG00000198518|ENSG00000178458|ENSG00000197657|ENSG00000196787|ENSG00000182572|ENSG00000158691|ENSG00000196501|ENSG00000196226|ENSG00000182611|ENSG00000124693|ENSG00000187475|ENSG00000197279|ENSG00000124610|ENSG00000124613|ENSG00000197202|ENSG00000184825|ENSG00000112727|ENSG00000158403|ENSG00000197697|ENSG00000096654|ENSG00000146109|ENSG00000189298|ENSG00000197459…	0.00266305
11-chr6-25000000-30000000	chromosome	ENSG00000168242|ENSG00000187837|ENSG00000198518|ENSG00000178458|ENSG00000196787|ENSG00000182572|ENSG00000196501|ENSG00000196226|ENSG00000182611|ENSG00000124693|ENSG00000187475|ENSG00000124610|ENSG00000184825|ENSG00000112727|ENSG00000158403|ENSG00000197697|ENSG00000197459|ENSG00000124578|ENSG00000158406|ENSG00000164508|ENSG00000197903|ENSG00000124575|ENSG00000168298|ENSG00000184357|ENSG00000168274…	2.45554e-05
12-chr6-27500000-32500000	nucleus	ENSG00000197657|ENSG00000182572|ENSG00000158691|ENSG00000196501|ENSG00000182611|ENSG00000197279|ENSG00000197202|ENSG00000096654|ENSG00000189298|ENSG00000137404|ENSG00000184357|ENSG00000137310|ENSG00000197153|ENSG00000185130|ENSG00000187626|ENSG00000196374|ENSG00000137337|ENSG00000197062|ENSG00000137338|ENSG00000197914|ENSG00000196866|ENSG00000198558|ENSG00000198563|ENSG00000066379|ENSG00000184348…	0.000154531
12-chr6-27500000-32500000	chromosome	ENSG00000182572|ENSG00000196501|ENSG00000182611|ENSG00000184357|ENSG00000197153|ENSG00000185130|ENSG00000196374|ENSG00000197914|ENSG00000196866|ENSG00000198558|ENSG00000184348|ENSG00000196747|ENSG00000196331|ENSG00000197238|ENSG00000198374|	8.15625e-13
60-chr6-147500000-152500000	immunological synapse	ENSG00000164520|ENSG00000111981|ENSG00000155918|ENSG00000131015|ENSG00000131019|	2.00365e-12
61-chr6-150000000-155000000	immunological synapse	ENSG00000164520|ENSG00000111981|ENSG00000155918|ENSG00000131015|ENSG00000131019|	0.0251567
11-chr7-25000000-30000000	nucleus	ENSG00000153807|ENSG00000106004|ENSG00000146592|ENSG00000005073|ENSG00000106006|ENSG00000050344|ENSG00000106052|ENSG00000153814|ENSG00000078399|ENSG00000197576|ENSG00000106031|ENSG00000105991|ENSG00000105997|ENSG00000105996|ENSG00000106038|ENSG00000122592|ENSG00000122565|ENSG00000122566|	8.13226e-06
46-chr7-112500000-117500000	caveola	ENSG00000105974|ENSG00000105971|	9.18858e-07
47-chr7-115000000-120000000	caveola	ENSG00000105974|ENSG00000105971|	1.9857e-13
38-chr10-92500000-97500000	vesicular fraction	ENSG00000165841|ENSG00000138115|ENSG00000138109|ENSG00000108242|ENSG00000095596|	5.13291e-13
1-chr11-0-5000000	integral to membrane	ENSG00000177769|ENSG00000167323|ENSG00000176893|ENSG00000176895|ENSG00000149043|ENSG00000069696|ENSG00000110651|ENSG00000110713|ENSG00000176798|ENSG00000175609|ENSG00000171999|ENSG00000184524|ENSG00000070985|ENSG00000148985|ENSG00000176879|ENSG00000197674|ENSG00000184350|ENSG00000129749|ENSG00000185201|ENSG00000185885|ENSG00000167332|ENSG00000174915|ENSG00000177697|ENSG00000176900|ENSG00000129744…	0.00521947
2-chr11-2500000-7500000	integral to membrane	ENSG00000166341|ENSG00000132259|ENSG00000184698|ENSG00000170803|ENSG00000184881|ENSG00000167323|ENSG00000176893|ENSG00000176895|ENSG00000188124|ENSG00000170790|ENSG00000110148|ENSG00000167355|ENSG00000110713|ENSG00000178358|ENSG00000176798|ENSG00000170782|ENSG00000167359|ENSG00000175609|ENSG00000180923|ENSG00000171999|ENSG00000180934|ENSG00000180988|ENSG00000181009|ENSG00000184321|ENSG00000183251…	1.26456e-06
3-chr11-5000000-10000000	integral to membrane	ENSG00000166341|ENSG00000132259|ENSG00000184698|ENSG00000170803|ENSG00000184881|ENSG00000188124|ENSG00000170790|ENSG00000110148|ENSG00000175393|ENSG00000167355|ENSG00000178358|ENSG00000170782|ENSG00000167359|ENSG00000180923|ENSG00000180934|ENSG00000180988|ENSG00000181009|ENSG00000184321|ENSG00000183251|ENSG00000176787|ENSG00000171944|ENSG00000181074|ENSG00000181001|ENSG00000187747|ENSG00000170683…	1.26497e-07
20-chr11-47500000-52500000	integral to membrane	ENSG00000176540|ENSG00000176547|ENSG00000175619|ENSG00000109920|ENSG00000176537|ENSG00000185926|ENSG00000176555|ENSG00000086205|ENSG00000178306|ENSG00000176567|ENSG00000172208|ENSG00000030066|ENSG00000109919|ENSG00000186483|ENSG00000149177|	0.00389985
22-chr11-52500000-57500000	integral to membrane	ENSG00000174970|ENSG00000149133|ENSG00000172459|ENSG00000172457|ENSG00000197468|ENSG00000181761|ENSG00000188439|ENSG00000181296|ENSG00000181943|ENSG00000198877|ENSG00000181273|ENSG00000109991|ENSG00000186124|ENSG00000181767|ENSG00000187612|ENSG00000181780|ENSG00000181939|ENSG00000134817|ENSG00000181718|ENSG00000181785|ENSG00000181903|ENSG00000185701|ENSG00000181723|ENSG00000172199|ENSG00000167822…	0.0466703
23-chr11-55000000-60000000	integral to membrane	ENSG00000174970|ENSG00000166928|ENSG00000172774|ENSG00000149516|ENSG00000166927|ENSG00000166926|ENSG00000156738|ENSG00000172772|ENSG00000149133|ENSG00000172320|ENSG00000172769|ENSG00000172459|ENSG00000172324|ENSG00000166930|ENSG00000172457|ENSG00000197468|ENSG00000181761|ENSG00000188439|ENSG00000181296|ENSG00000181943|ENSG00000172365|ENSG00000172362|ENSG00000186509|ENSG00000172289|ENSG00000198877…	0.0260107
24-chr11-57500000-62500000	integral to membrane	ENSG00000166959|ENSG00000168000|ENSG00000166928|ENSG00000168003|ENSG00000172774|ENSG00000149516|ENSG00000166927|ENSG00000166926|ENSG00000156738|ENSG00000172772|ENSG00000172689|ENSG00000172320|ENSG00000172769|ENSG00000071203|ENSG00000172324|ENSG00000013725|ENSG00000166930|ENSG00000149506|ENSG00000172365|ENSG00000172362|ENSG00000186509|ENSG00000172289|ENSG00000172381|ENSG00000166900|ENSG00000176200…	0.0155923
49-chr11-120000000-125000000	integral to membrane	ENSG00000181457|ENSG00000149403|ENSG00000134910|ENSG00000197309|ENSG00000181214|ENSG00000166250|ENSG00000166257|ENSG00000154134|ENSG00000154133|ENSG00000171014|ENSG00000182634|ENSG00000137642|ENSG00000186268|ENSG00000198657|ENSG00000197263|ENSG00000109929|ENSG00000196341|ENSG00000196403|ENSG00000149564|ENSG00000196248|ENSG00000196099|ENSG00000019102|ENSG00000196119|ENSG00000196703|ENSG00000181518…	0.0202085
50-chr11-122500000-127500000	integral to membrane	ENSG00000181457|ENSG00000134910|ENSG00000197309|ENSG00000181214|ENSG00000166257|ENSG00000154134|ENSG00000154133|ENSG00000171014|ENSG00000182634|ENSG00000186268|ENSG00000149571|ENSG00000198657|ENSG00000197263|ENSG00000196341|ENSG00000196403|ENSG00000149564|ENSG00000196248|ENSG00000196099|ENSG00000019102|ENSG00000196119|ENSG00000196703|ENSG00000181518|ENSG00000197125|ENSG00000197849|ENSG00000170953…	1.18576e-07
4-chr12-7500000-12500000	integral to membrane	ENSG00000134545|ENSG00000197992|ENSG00000121318|ENSG00000196229|ENSG00000173342|ENSG00000172243|ENSG00000121314|ENSG00000173262|ENSG00000150045|ENSG00000134539|ENSG00000121377|ENSG00000150048|ENSG00000184293|ENSG00000177575|ENSG00000121381|ENSG00000166523|ENSG00000069493|ENSG00000070018|ENSG00000166527|ENSG00000110848|ENSG00000165682|ENSG00000173391|ENSG00000111788|ENSG00000139187|ENSG00000111261…	2.88426e-06
20-chr12-47500000-52500000	cytoskeleton	ENSG00000186049|ENSG00000111057|ENSG00000185069|ENSG00000170523|ENSG00000170484|ENSG00000170486|ENSG00000135406|ENSG00000170465|ENSG00000139648|ENSG00000135480|ENSG00000170442|ENSG00000185479|ENSG00000161849|ENSG00000170477|ENSG00000185640|ENSG00000161850|ENSG00000172602|ENSG00000189182|ENSG00000170454|ENSG00000186081|ENSG00000186442|ENSG00000123416|ENSG00000167768|ENSG00000172867|ENSG00000135443…	3.5377e-05
21-chr12-50000000-55000000	cytoskeleton	ENSG00000186049|ENSG00000111057|ENSG00000185069|ENSG00000170523|ENSG00000170484|ENSG00000170486|ENSG00000170465|ENSG00000139648|ENSG00000135480|ENSG00000170442|ENSG00000185479|ENSG00000161849|ENSG00000170477|ENSG00000185640|ENSG00000161850|ENSG00000189182|ENSG00000170454|ENSG00000186081|ENSG00000186442|ENSG00000167768|ENSG00000172867|ENSG00000135443|ENSG00000170423|ENSG00000135476|ENSG00000196465…	0.000542785
8-chr14-17500000-22500000	integral to membrane	ENSG00000176281|ENSG00000155465|ENSG00000196143|ENSG00000155463|ENSG00000165762|ENSG00000176312|ENSG00000157227|ENSG00000181803|ENSG00000169484|ENSG00000169488|ENSG00000129562|ENSG00000172611|ENSG00000184394|ENSG00000176299|ENSG00000155249|ENSG00000176294|ENSG00000165794|ENSG00000092217|ENSG00000166056|ENSG00000176198|ENSG00000169208|ENSG00000176213|ENSG00000196832|ENSG00000186445|ENSG00000165782…	0.013441
29-chr16-70000000-75000000	Golgi membrane	ENSG00000135702|ENSG00000090863|ENSG00000140835|ENSG00000183196|	0.00161113
4-chr17-7500000-12500000	muscle myosin	ENSG00000006788|ENSG00000125414|ENSG00000133020|ENSG00000109061|ENSG00000141048|	0.00122328
4-chr17-7500000-12500000	contractile fiber	ENSG00000006788|ENSG00000125414|ENSG00000133020|ENSG00000109063|ENSG00000109061|ENSG00000141048|	0.00587948
5-chr17-10000000-15000000	muscle myosin	ENSG00000006788|ENSG00000125414|ENSG00000133020|ENSG00000109061|ENSG00000141048|	0.0278778
5-chr17-10000000-15000000	contractile fiber	ENSG00000006788|ENSG00000125414|ENSG00000133020|ENSG00000109063|ENSG00000109061|ENSG00000141048|	0.0400241
14-chr17-32500000-37500000	cytoskeleton	ENSG00000171431|ENSG00000186852|ENSG00000196596|ENSG00000171420|ENSG00000186847|ENSG00000198249|ENSG00000186831|ENSG00000197079|ENSG00000186832|ENSG00000171446|ENSG00000002834|ENSG00000196859|ENSG00000187242|ENSG00000108417|ENSG00000187272|ENSG00000188581|ENSG00000126337|ENSG00000171360|ENSG00000131737|ENSG00000180576|ENSG00000171345|ENSG00000171346|ENSG00000196156|ENSG00000171403|ENSG00000171401…	0.0082849
15-chr17-35000000-40000000	cytoskeleton	ENSG00000171431|ENSG00000186852|ENSG00000196596|ENSG00000171420|ENSG00000186847|ENSG00000131462|ENSG00000198249|ENSG00000186831|ENSG00000197079|ENSG00000186832|ENSG00000171446|ENSG00000196859|ENSG00000187242|ENSG00000108417|ENSG00000187272|ENSG00000188581|ENSG00000126337|ENSG00000171360|ENSG00000131737|ENSG00000180576|ENSG00000171345|ENSG00000171346|ENSG00000196156|ENSG00000171403|ENSG00000171401…	0.0432626
10-chr18-22500000-27500000	cell junction	ENSG00000134755|ENSG00000134757|ENSG00000134760|ENSG00000134762|ENSG00000134765|ENSG00000046604|	0.00120837
10-chr18-22500000-27500000	cytoskeleton	ENSG00000175065|ENSG00000134755|ENSG00000134757|ENSG00000134760|ENSG00000134762|ENSG00000134765|ENSG00000046604|	0.00104908
11-chr18-25000000-30000000	cell junction	ENSG00000134755|ENSG00000134757|ENSG00000134760|ENSG00000134762|ENSG00000134765|ENSG00000046604|	8.13226e-06
9-chr19-20000000-25000000	nucleus	ENSG00000197020|ENSG00000167232|ENSG00000197360|ENSG00000160352|ENSG00000183850|ENSG00000198521|ENSG00000160229|ENSG00000105750|ENSG00000197372|ENSG00000196686|ENSG00000196705|ENSG00000118620|ENSG00000197134|ENSG00000104777|ENSG00000196268|ENSG00000196172|ENSG00000196350|	0.00824459
25-chr19-60000000-65000000	nucleus	ENSG00000090971|ENSG00000198046|ENSG00000152475|ENSG00000083842|ENSG00000083844|ENSG00000189430|ENSG00000188785|ENSG00000105066|ENSG00000083838|ENSG00000196724|ENSG00000186272|ENSG00000119574|ENSG00000171425|ENSG00000083828|ENSG00000184294|ENSG00000181894|ENSG00000018869|ENSG00000173480|ENSG00000197025|ENSG00000171443|ENSG00000171606|ENSG00000179909|ENSG00000171574|ENSG00000141946|ENSG00000197951…	0.000609257
26-chr19-62500000-67500000	nucleus	ENSG00000152475|ENSG00000083842|ENSG00000188785|ENSG00000083838|ENSG00000196724|ENSG00000186272|ENSG00000119574|ENSG00000083828|ENSG00000184294|ENSG00000181894|ENSG00000173480|ENSG00000171606|ENSG00000179909|ENSG00000171574|ENSG00000176293|ENSG00000166704|ENSG00000152454|ENSG00000152467|ENSG00000121406|ENSG00000099326|ENSG00000131845|ENSG00000083817|ENSG00000131849|ENSG00000083814|ENSG00000105132…	2.19309e-17
17-chr21-40000000-45000000	nucleolar preribosome	ENSG00000160208|ENSG00000160214|	8.32903e-09
17-chr21-40000000-45000000	preribosome	ENSG00000160208|ENSG00000160214|	6.36138e-12
18-chr21-42500000-47500000	nucleolar preribosome	ENSG00000160208|ENSG00000160214|	1.22842e-11
18-chr21-42500000-47500000	preribosome	ENSG00000160208|ENSG00000160214|	6.35492e-06
19-chr22-45000000-50000000	integral to membrane of membrane fraction	ENSG00000100422|ENSG00000100427|	6.48257e-08
43-chrX-105000000-110000000	collagen type IV	ENSG00000188153|ENSG00000197565|	3.56586e-05
1-chr1-0-5000000	tumor necrosis factor binding	ENSG00000186827|ENSG00000186891|ENSG00000157873|	0.00013963
1-chr1-0-5000000	death receptor activity	ENSG00000186827|ENSG00000186891|ENSG00000157873|	0.0411925
6-chr1-12500000-17500000	hydrolase activity, acting on carbon-nitrogen (but not peptide) bonds, in linear amidines	ENSG00000142619|ENSG00000116771|ENSG00000142623|ENSG00000117115|	0.0290433
7-chr1-15000000-20000000	hydrolase activity, acting on carbon-nitrogen (but not peptide) bonds, in linear amidines	ENSG00000159339|ENSG00000197996|ENSG00000142619|ENSG00000116771|ENSG00000142623|ENSG00000117115|	0.0175697
8-chr1-17500000-22500000	carboxylic ester hydrolase activity	ENSG00000188257|ENSG00000127472|ENSG00000117215|ENSG00000158786|ENSG00000188784|ENSG00000187980|	0.011156
9-chr1-20000000-25000000	carboxylic ester hydrolase activity	ENSG00000188257|ENSG00000127472|ENSG00000117215|ENSG00000158786|ENSG00000188784|ENSG00000187980|	0.0124727
14-chr1-32500000-37500000	gap-junction forming channel activity	ENSG00000188910|ENSG00000187513|ENSG00000189433|ENSG00000189280|	0.00693397
41-chr1-100000000-105000000	hydrolase activity, hydrolyzing O-glycosyl compounds	ENSG00000162688|ENSG00000196318|ENSG00000187733|ENSG00000174876|ENSG00000197839|ENSG00000051415|	0.0112753
42-chr1-102500000-107500000	hydrolase activity, hydrolyzing O-glycosyl compounds	ENSG00000196318|ENSG00000187733|ENSG00000174876|ENSG00000197839|ENSG00000051415|	0.000861995
44-chr1-107500000-112500000	glutathione transferase activity	ENSG00000134184|ENSG00000134202|ENSG00000134201|ENSG00000168765|	2.28643e-14
45-chr1-110000000-115000000	glutathione transferase activity	ENSG00000134184|ENSG00000134202|ENSG00000134201|ENSG00000168765|	1.23425e-29
60-chr1-147500000-152500000	calcium ion binding	ENSG00000176807|ENSG00000197747|ENSG00000189334|ENSG00000197956|ENSG00000196754|ENSG00000189171|ENSG00000184330|ENSG00000143556|ENSG00000188015|ENSG00000143546|ENSG00000188643|ENSG00000197364|ENSG00000196154|ENSG00000182898|ENSG00000197915|ENSG00000163191|ENSG00000163221|ENSG00000163220|ENSG00000143412|ENSG00000159450|ENSG00000196420|ENSG00000143536|ENSG00000160678|	1.44274e-12
61-chr1-150000000-155000000	calcium ion binding	ENSG00000176807|ENSG00000197747|ENSG00000189334|ENSG00000197956|ENSG00000169231|ENSG00000196754|ENSG00000189171|ENSG00000184330|ENSG00000143556|ENSG00000188015|ENSG00000143546|ENSG00000188643|ENSG00000197364|ENSG00000196154|ENSG00000132718|ENSG00000182898|ENSG00000197915|ENSG00000163191|ENSG00000163221|ENSG00000163220|ENSG00000159450|ENSG00000160783|ENSG00000196420|ENSG00000143536|ENSG00000160678|	2.71913e-05
63-chr1-155000000-160000000	G-protein coupled receptor activity	ENSG00000180433|ENSG00000188340|ENSG00000158731|ENSG00000186400|ENSG00000184155|ENSG00000186306|ENSG00000198703|ENSG00000197403|ENSG00000173285|ENSG00000196171|ENSG00000198965|ENSG00000198967|ENSG00000186440|ENSG00000180409|ENSG00000196184|ENSG00000197532|	2.71913e-05
63-chr1-155000000-160000000	IgG binding	ENSG00000072694|ENSG00000143226|ENSG00000162747|	0.0182301
64-chr1-157500000-162500000	IgG binding	ENSG00000072694|ENSG00000143226|ENSG00000162747|	0.0392756
67-chr1-165000000-170000000	oxidoreductase activity, acting on paired donors, with incorporation or reduction of molecular oxygen, NAD or NADH as one donor, and incorporation of one atom of oxygen	ENSG00000094963|ENSG00000007933|ENSG00000117507|ENSG00000076258|ENSG00000010932|	0.0412087
68-chr1-167500000-172500000	oxidoreductase activity, acting on paired donors, with incorporation or reduction of molecular oxygen, NAD or NADH as one donor, and incorporation of one atom of oxygen	ENSG00000094963|ENSG00000007933|ENSG00000117507|ENSG00000076258|ENSG00000010932|	0.020207
68-chr1-167500000-172500000	tumor necrosis factor receptor binding	ENSG00000117586|ENSG00000117560|ENSG00000120337|	0.0151729
69-chr1-170000000-175000000	tumor necrosis factor receptor binding	ENSG00000117586|ENSG00000117560|ENSG00000120337|	0.00189434
98-chr1-242500000-247500000	G-protein coupled receptor activity	ENSG00000169214|ENSG00000177186|ENSG00000177212|ENSG00000196936|ENSG00000196944|ENSG00000177476|ENSG00000177174|ENSG00000196071|ENSG00000187080|ENSG00000177489|ENSG00000196079|ENSG00000198281|ENSG00000177535|ENSG00000171180|ENSG00000196539|ENSG00000198601|ENSG00000198118|ENSG00000183310|ENSG00000182783|ENSG00000196772|ENSG00000183130|ENSG00000197437|ENSG00000188558|ENSG00000198452|ENSG00000197454…	0.00138181
99-chr1-245000000-250000000	G-protein coupled receptor activity	ENSG00000169214|ENSG00000177186|ENSG00000177212|ENSG00000196936|ENSG00000196944|ENSG00000177476|ENSG00000177174|ENSG00000196071|ENSG00000187080|ENSG00000177489|ENSG00000196079|ENSG00000198281|ENSG00000177535|ENSG00000171180|ENSG00000196539|ENSG00000198601|ENSG00000198118|ENSG00000183310|ENSG00000182783|ENSG00000196772|ENSG00000183130|ENSG00000197437|ENSG00000188558|ENSG00000198452|ENSG00000197454…	0.0445553
40-chr2-97500000-102500000	hematopoietin/interferon-class (D200-domain) cytokine receptor activity	ENSG00000115590|ENSG00000115598|ENSG00000115602|ENSG00000115604|ENSG00000115594|	0.00392074
40-chr2-97500000-102500000	interleukin-1 binding	ENSG00000115590|ENSG00000115598|ENSG00000115602|ENSG00000115604|ENSG00000115594|	3.75978e-09
40-chr2-97500000-102500000	interleukin binding	ENSG00000115590|ENSG00000115598|ENSG00000115602|ENSG00000115604|ENSG00000115594|	3.05518e-15
41-chr2-100000000-105000000	hematopoietin/interferon-class (D200-domain) cytokine receptor activity	ENSG00000115590|ENSG00000115598|ENSG00000115602|ENSG00000115604|ENSG00000115594|	1.8637e-10
41-chr2-100000000-105000000	interleukin-1 binding	ENSG00000115590|ENSG00000115598|ENSG00000115602|ENSG00000115604|ENSG00000115594|	1.48473e-16
41-chr2-100000000-105000000	interleukin binding	ENSG00000115590|ENSG00000115598|ENSG00000115602|ENSG00000115604|ENSG00000115594|	0.00215918
45-chr2-110000000-115000000	fibroblast growth factor receptor binding	ENSG00000136696|ENSG00000136697|ENSG00000136694|ENSG00000136695|ENSG00000125571|ENSG00000136689|ENSG00000136688|	0.00392074
45-chr2-110000000-115000000	fibroblast growth factor receptor antagonist activity	ENSG00000136696|ENSG00000136697|ENSG00000136694|ENSG00000136695|ENSG00000125571|ENSG00000136689|ENSG00000136688|	0.0254931
45-chr2-110000000-115000000	interleukin-1 receptor binding	ENSG00000125538|ENSG00000136696|ENSG00000136697|ENSG00000136694|ENSG00000136695|ENSG00000125571|ENSG00000115008|ENSG00000136689|ENSG00000136688|	0.00306531
45-chr2-110000000-115000000	receptor inhibitor activity	ENSG00000136696|ENSG00000136697|ENSG00000136694|ENSG00000136695|ENSG00000125571|ENSG00000136689|ENSG00000136688|	0.00156164
46-chr2-112500000-117500000	fibroblast growth factor receptor binding	ENSG00000136696|ENSG00000136697|ENSG00000136694|ENSG00000136695|ENSG00000125571|ENSG00000136689|ENSG00000136688|	0.0006173
46-chr2-112500000-117500000	fibroblast growth factor receptor antagonist activity	ENSG00000136696|ENSG00000136697|ENSG00000136694|ENSG00000136695|ENSG00000125571|ENSG00000136689|ENSG00000136688|	1.21372e-05
46-chr2-112500000-117500000	interleukin-1 receptor binding	ENSG00000125538|ENSG00000136696|ENSG00000136697|ENSG00000136694|ENSG00000136695|ENSG00000125571|ENSG00000115008|ENSG00000136689|ENSG00000136688|	0.000779821
46-chr2-112500000-117500000	receptor inhibitor activity	ENSG00000136696|ENSG00000136697|ENSG00000136694|ENSG00000136695|ENSG00000125571|ENSG00000136689|ENSG00000136688|	0.0189838
66-chr2-162500000-167500000	voltage-gated ion channel activity	ENSG00000144285|ENSG00000153253|ENSG00000136531|ENSG00000136546|ENSG00000184611|	0.000817496
70-chr2-172500000-177500000	transcription factor activity	ENSG00000170178|ENSG00000138433|ENSG00000128709|ENSG00000170166|ENSG00000115844|ENSG00000144355|ENSG00000128714|ENSG00000128710|ENSG00000128713|ENSG00000128652|ENSG00000128645|ENSG00000174279|ENSG00000175879|	1.05518e-33
71-chr2-175000000-180000000	transcription factor activity	ENSG00000170178|ENSG00000128709|ENSG00000170166|ENSG00000128714|ENSG00000128710|ENSG00000128713|ENSG00000128652|ENSG00000116044|ENSG00000128645|ENSG00000174279|ENSG00000175879|	8.40866e-22
10-chr3-22500000-27500000	steroid hormone receptor activity	ENSG00000151090|ENSG00000174738|ENSG00000077092|	6.05286e-05
18-chr3-42500000-47500000	peptide receptor activity, G-protein coupled	ENSG00000163823|ENSG00000160791|ENSG00000173585|ENSG00000121807|ENSG00000173578|ENSG00000144648|ENSG00000121797|ENSG00000183625|ENSG00000172215|	0.0268413
18-chr3-42500000-47500000	chemokine binding	ENSG00000163823|ENSG00000160791|ENSG00000173585|ENSG00000121807|ENSG00000173578|ENSG00000144648|ENSG00000121797|ENSG00000183625|ENSG00000172215|	5.31574e-39
19-chr3-45000000-50000000	peptide receptor activity, G-protein coupled	ENSG00000163823|ENSG00000160791|ENSG00000173585|ENSG00000121807|ENSG00000173578|ENSG00000121797|ENSG00000183625|ENSG00000172215|	5.20988e-49
19-chr3-45000000-50000000	chemokine binding	ENSG00000163823|ENSG00000160791|ENSG00000173585|ENSG00000121807|ENSG00000173578|ENSG00000121797|ENSG00000183625|ENSG00000172215|	6.35492e-06
31-chr3-75000000-80000000	axon guidance receptor activity	ENSG00000185008|ENSG00000169855|	0.0108812
40-chr3-97500000-102500000	G-protein coupled receptor activity	ENSG00000196098|ENSG00000187900|ENSG00000197938|ENSG00000154165|ENSG00000196578|ENSG00000144820|ENSG00000197036|ENSG00000197621|ENSG00000181828|	0.0108812
50-chr3-122500000-127500000	transferase activity, transferring pentosyl groups	ENSG00000114491|ENSG00000138496|ENSG00000173193|ENSG00000173200|	0.0121715
59-chr3-145000000-150000000	phospholipid scramblase activity	ENSG00000188313|ENSG00000163746|ENSG00000114698|	8.28823e-06
60-chr3-147500000-152500000	phospholipid scramblase activity	ENSG00000188313|ENSG00000163746|	0.0183912
61-chr3-150000000-155000000	nucleotide receptor activity	ENSG00000138271|ENSG00000198829|ENSG00000169313|ENSG00000169860|ENSG00000181631|ENSG00000174944|ENSG00000174946|	2.15484e-10
62-chr3-152500000-157500000	nucleotide receptor activity	ENSG00000198829|ENSG00000169313|ENSG00000169860|ENSG00000181631|	1.53358e-11
18-chr4-42500000-47500000	GABA receptor activity	ENSG00000163285|ENSG00000163288|ENSG00000109158|ENSG00000151834|	1.10737e-09
18-chr4-42500000-47500000	ligand-gated ion channel activity	ENSG00000163285|ENSG00000163288|ENSG00000109158|ENSG00000151834|	2.4484e-07
19-chr4-45000000-50000000	GABA receptor activity	ENSG00000163285|ENSG00000163288|ENSG00000109158|ENSG00000151834|	0.000831671
19-chr4-45000000-50000000	ligand-gated ion channel activity	ENSG00000163285|ENSG00000163288|ENSG00000198515|ENSG00000109158|ENSG00000151834|	7.39119e-24
27-chr4-65000000-70000000	transferase activity, transferring hexosyl groups	ENSG00000171234|ENSG00000135220|ENSG00000198277|ENSG00000197592|ENSG00000109181|ENSG00000197888|	0.0006173
27-chr4-65000000-70000000	UDP-glycosyltransferase activity	ENSG00000171234|ENSG00000198277|ENSG00000197592|ENSG00000109181|ENSG00000197888|	9.36241e-08
27-chr4-65000000-70000000	serine-type peptidase activity	ENSG00000187054|ENSG00000198092|ENSG00000087128|ENSG00000153802|ENSG00000185873|	0.0079827
28-chr4-67500000-72500000	transferase activity, transferring hexosyl groups	ENSG00000171234|ENSG00000135226|ENSG00000135220|ENSG00000198277|ENSG00000197592|ENSG00000173610|ENSG00000109181|ENSG00000156096|ENSG00000197888|	0.0133961
28-chr4-67500000-72500000	UDP-glycosyltransferase activity	ENSG00000171234|ENSG00000135226|ENSG00000198277|ENSG00000197592|ENSG00000173610|ENSG00000109181|ENSG00000156096|ENSG00000197888|	1.78079e-10
28-chr4-67500000-72500000	structural constituent of tooth enamel	ENSG00000126549|ENSG00000178522|ENSG00000132464|	0.024005
29-chr4-70000000-75000000	chemokine receptor binding	ENSG00000169429|ENSG00000163739|ENSG00000124875|ENSG00000109272|	1.36314e-05
29-chr4-70000000-75000000	structural constituent of tooth enamel	ENSG00000126549|ENSG00000178522|ENSG00000132464|	0.0106819
29-chr4-70000000-75000000	chemokine activity	ENSG00000169429|ENSG00000163739|ENSG00000124875|ENSG00000109272|	0.0430097
30-chr4-72500000-77500000	chemokine receptor binding	ENSG00000169429|ENSG00000138755|ENSG00000163739|ENSG00000163737|ENSG00000163736|ENSG00000163735|ENSG00000163734|ENSG00000124875|ENSG00000081041|ENSG00000169245|ENSG00000169248|ENSG00000109272|	3.29679e-10
30-chr4-72500000-77500000	chemokine activity	ENSG00000169429|ENSG00000138755|ENSG00000163739|ENSG00000163737|ENSG00000163736|ENSG00000163735|ENSG00000163734|ENSG00000124875|ENSG00000081041|ENSG00000169245|ENSG00000169248|ENSG00000109272|	8.17559e-12
31-chr4-75000000-80000000	chemokine receptor binding	ENSG00000156234|ENSG00000138755|ENSG00000163737|ENSG00000163736|ENSG00000163735|ENSG00000163734|ENSG00000081041|ENSG00000169245|ENSG00000169248|	0.0488839
31-chr4-75000000-80000000	chemokine activity	ENSG00000156234|ENSG00000138755|ENSG00000163737|ENSG00000163736|ENSG00000163735|ENSG00000163734|ENSG00000081041|ENSG00000169245|ENSG00000169248|	0.0200324
40-chr4-97500000-102500000	oxidoreductase activity, acting on the CH-OH group of donors, NAD or NADP as acceptor	ENSG00000197894|ENSG00000196616|ENSG00000196344|ENSG00000198099|ENSG00000172955|ENSG00000187758|	0.0498699
41-chr4-100000000-105000000	oxidoreductase activity, acting on the CH-OH group of donors, NAD or NADP as acceptor	ENSG00000197894|ENSG00000196616|ENSG00000196344|ENSG00000198099|ENSG00000172955|ENSG00000187758|	0.0445553
49-chr4-120000000-125000000	interleukin-2 receptor binding	ENSG00000109471|ENSG00000138684|	0.000219812
50-chr4-122500000-127500000	interleukin-2 receptor binding	ENSG00000109471|ENSG00000138684|	0.03687
15-chr5-35000000-40000000	hematopoietin/interferon-class (D200-domain) cytokine receptor activity	ENSG00000145623|ENSG00000113594|ENSG00000113494|ENSG00000168685|	7.50035e-05
52-chr5-127500000-132500000	hematopoietin/interferon-class (D200-domain) cytokine receptor binding	ENSG00000169194|ENSG00000164399|ENSG00000164400|ENSG00000113520|ENSG00000113525|	0.00810559
53-chr5-130000000-135000000	hematopoietin/interferon-class (D200-domain) cytokine receptor binding	ENSG00000169194|ENSG00000164399|ENSG00000164400|ENSG00000113520|ENSG00000113525|	1.21734e-05
56-chr5-137500000-142500000	calcium ion binding	ENSG00000113212|ENSG00000113211|ENSG00000197479|ENSG00000187372|ENSG00000120328|ENSG00000171815|ENSG00000120322|ENSG00000120324|ENSG00000120327|ENSG00000113248|ENSG00000112852|ENSG00000113555|ENSG00000146001|ENSG00000081853|ENSG00000196963|ENSG00000081842|ENSG00000156453|ENSG00000113205|ENSG00000113209|ENSG00000081818|	0.0175697
57-chr5-140000000-145000000	calcium ion binding	ENSG00000113212|ENSG00000113211|ENSG00000197479|ENSG00000187372|ENSG00000120328|ENSG00000171815|ENSG00000120322|ENSG00000120324|ENSG00000120327|ENSG00000113248|ENSG00000112852|ENSG00000113555|ENSG00000146001|ENSG00000081853|ENSG00000196963|ENSG00000081842|ENSG00000156453|ENSG00000113205|ENSG00000113209|ENSG00000081818|	4.64764e-18
64-chr5-157500000-162500000	GABA receptor activity	ENSG00000145863|ENSG00000145864|ENSG00000113327|ENSG00000022355|	6.3144e-06
64-chr5-157500000-162500000	ligand-gated ion channel activity	ENSG00000145863|ENSG00000145864|ENSG00000113327|ENSG00000022355|	1.8637e-10
64-chr5-157500000-162500000	benzodiazepine receptor activity	ENSG00000145863|ENSG00000113327|	5.88977e-06
65-chr5-160000000-165000000	GABA receptor activity	ENSG00000145863|ENSG00000145864|ENSG00000113327|ENSG00000022355|	0.0231455
65-chr5-160000000-165000000	ligand-gated ion channel activity	ENSG00000145863|ENSG00000145864|ENSG00000113327|ENSG00000022355|	0.00184253
65-chr5-160000000-165000000	benzodiazepine receptor activity	ENSG00000145863|ENSG00000113327|	0.00333353
10-chr6-22500000-27500000	inorganic anion transporter activity	ENSG00000124568|ENSG00000124564|ENSG00000112337|ENSG00000146039|	0.00392074
10-chr6-22500000-27500000	anion:cation symporter activity	ENSG00000124564|ENSG00000112337|ENSG00000146039|	6.19478e-06
11-chr6-25000000-30000000	inorganic anion transporter activity	ENSG00000124568|ENSG00000124564|ENSG00000112337|ENSG00000146039|	7.71826e-07
12-chr6-27500000-32500000	transcription factor activity	ENSG00000197279|ENSG00000197202|ENSG00000189298|ENSG00000137310|ENSG00000187626|ENSG00000066379|ENSG00000137411|ENSG00000187987|ENSG00000198315|ENSG00000196812|ENSG00000197062|ENSG00000137338|ENSG00000197657|ENSG00000158691|ENSG00000137185|	0.00836816
13-chr6-30000000-35000000	MHC class II receptor activity	ENSG00000196735|ENSG00000168379|ENSG00000198502|ENSG00000196126|ENSG00000179344|ENSG00000168384|ENSG00000168383|ENSG00000196301|	6.99337e-06
14-chr6-32500000-37500000	MHC class II receptor activity	ENSG00000196735|ENSG00000168379|ENSG00000198502|ENSG00000196126|ENSG00000179344|ENSG00000168384|ENSG00000168383|ENSG00000196301|	0.000659152
21-chr6-50000000-55000000	glutathione transferase activity	ENSG00000187919|ENSG00000174156|ENSG00000182793|ENSG00000170899|ENSG00000096087|	2.4484e-07
22-chr6-52500000-57500000	glutathione transferase activity	ENSG00000187919|ENSG00000174156|ENSG00000182793|ENSG00000170899|ENSG00000096087|	0.0377645
60-chr6-147500000-152500000	MHC class I receptor activity	ENSG00000164520|ENSG00000111981|ENSG00000131015|ENSG00000131019|ENSG00000155918|	0.00448168
61-chr6-150000000-155000000	MHC class I receptor activity	ENSG00000164520|ENSG00000111981|ENSG00000131015|ENSG00000131019|ENSG00000155918|	0.0136434
64-chr6-157500000-162500000	organic cation transporter activity	ENSG00000146477|ENSG00000112499|ENSG00000175003|	0.000910244
65-chr6-160000000-165000000	organic cation transporter activity	ENSG00000146477|ENSG00000112499|ENSG00000175003|	0.00135457
10-chr7-22500000-27500000	transcription factor activity	ENSG00000005073|ENSG00000050344|ENSG00000106031|ENSG00000105991|ENSG00000105997|ENSG00000105996|ENSG00000106038|ENSG00000078399|ENSG00000197576|ENSG00000153807|ENSG00000106004|ENSG00000106006|ENSG00000122592|	0.00333339
11-chr7-25000000-30000000	transcription factor activity	ENSG00000146592|ENSG00000005073|ENSG00000050344|ENSG00000106031|ENSG00000105991|ENSG00000105997|ENSG00000105996|ENSG00000106038|ENSG00000078399|ENSG00000197576|ENSG00000153807|ENSG00000106004|ENSG00000106006|ENSG00000122592|	0.0426234
25-chr7-60000000-65000000	transition metal ion binding	ENSG00000197008|ENSG00000198039|ENSG00000196247|ENSG00000173041|ENSG00000146757|ENSG00000197123|ENSG00000152926|	0.000526924
39-chr7-95000000-100000000	oxidoreductase activity, acting on paired donors, with incorporation or reduction of molecular oxygen, reduced flavin or flavoprotein as one donor, and incorporation of one atom of oxygen	ENSG00000106258|ENSG00000160870|ENSG00000160868|ENSG00000187851|ENSG00000021461|	0.00123534
40-chr7-97500000-102500000	oxidoreductase activity, acting on paired donors, with incorporation or reduction of molecular oxygen, reduced flavin or flavoprotein as one donor, and incorporation of one atom of oxygen	ENSG00000106258|ENSG00000160870|ENSG00000160868|ENSG00000187851|ENSG00000021461|	0.0125973
52-chr7-127500000-132500000	exopeptidase activity	ENSG00000158516|ENSG00000158525|ENSG00000128510|ENSG00000091704|	0.018566
34-chr8-82500000-87500000	hydro-lyase activity	ENSG00000185015|ENSG00000164879|ENSG00000104267|ENSG00000133742|	0.000182196
35-chr8-85000000-90000000	hydro-lyase activity	ENSG00000185015|ENSG00000164879|ENSG00000104267|ENSG00000133742|	0.00234518
8-chr9-17500000-22500000	hematopoietin/interferon-class (D200-domain) cytokine receptor binding	ENSG00000171855|ENSG00000120235|ENSG00000188379|ENSG00000147885|ENSG00000186809|ENSG00000120247|ENSG00000186803|ENSG00000120242|ENSG00000137080|ENSG00000147877|ENSG00000177047|ENSG00000147873|ENSG00000184995|ENSG00000137026|	0.0149663
9-chr9-20000000-25000000	hematopoietin/interferon-class (D200-domain) cytokine receptor binding	ENSG00000171855|ENSG00000120235|ENSG00000188379|ENSG00000147885|ENSG00000186809|ENSG00000120247|ENSG00000186803|ENSG00000120242|ENSG00000137080|ENSG00000147877|ENSG00000177047|ENSG00000147873|ENSG00000184995|ENSG00000137026|	0.0260107
27-chr9-65000000-70000000	formate-tetrahydrofolate ligase activity	ENSG00000182021|ENSG00000176134|	0.00216089
43-chr9-105000000-110000000	G-protein coupled receptor activity	ENSG00000136839|ENSG00000186943|ENSG00000179110|ENSG00000186881|ENSG00000179055|ENSG00000188712|ENSG00000179074|ENSG00000148136|	0.00266305
49-chr9-120000000-125000000	G-protein coupled receptor activity	ENSG00000136832|ENSG00000136834|ENSG00000171459|ENSG00000136939|ENSG00000171496|ENSG00000173679|ENSG00000171484|ENSG00000171481|ENSG00000171505|ENSG00000165202|ENSG00000165204|ENSG00000171501|ENSG00000188394|ENSG00000148215|ENSG00000197233|	6.93368e-06
50-chr9-122500000-127500000	G-protein coupled receptor activity	ENSG00000136832|ENSG00000136834|ENSG00000171459|ENSG00000136939|ENSG00000171496|ENSG00000173679|ENSG00000180264|ENSG00000171484|ENSG00000171481|ENSG00000171505|ENSG00000165202|ENSG00000165204|ENSG00000171501|ENSG00000188394|ENSG00000148215|ENSG00000197233|	2.91163e-11
55-chr9-135000000-140000000	prostaglandin-D synthase activity	ENSG00000187922|ENSG00000107317|ENSG00000177984|ENSG00000184925|	8.18458e-16
56-chr9-137500000-142500000	prostaglandin-D synthase activity	ENSG00000187922|ENSG00000107317|ENSG00000177984|ENSG00000184925|	8.15625e-13
2-chr10-2500000-7500000	monocarboxylic acid transporter activity	ENSG00000151632|ENSG00000198610|ENSG00000187134|	0.00539632
2-chr10-2500000-7500000	oxidoreductase activity, acting on the CH-CH group of donors, NAD or NADP as acceptor	ENSG00000151632|ENSG00000196139|ENSG00000187134|	3.23885e-16
2-chr10-2500000-7500000	oxidoreductase activity, acting on the CH-OH group of donors, NAD or NADP as acceptor	ENSG00000151632|ENSG00000151631|ENSG00000198610|ENSG00000196139|ENSG00000187134|	2.33754e-11
32-chr10-77500000-82500000	calcium ion binding	ENSG00000122359|ENSG00000122854|ENSG00000122852|ENSG00000133661|ENSG00000185303|ENSG00000156113|ENSG00000182314|	3.72527e-11
38-chr10-92500000-97500000	oxidoreductase activity, acting on paired donors, with incorporation or reduction of molecular oxygen, reduced flavin or flavoprotein as one donor, and incorporation of one atom of oxygen	ENSG00000165841|ENSG00000138109|ENSG00000108242|ENSG00000138115|	2.34561e-09
39-chr10-95000000-100000000	oxidoreductase activity, acting on paired donors, with incorporation or reduction of molecular oxygen, reduced flavin or flavoprotein as one donor, and incorporation of one atom of oxygen	ENSG00000165841|ENSG00000138109|ENSG00000108242|ENSG00000138115|	4.90824e-09
1-chr11-0-5000000	G-protein coupled receptor activity	ENSG00000176893|ENSG00000176895|ENSG00000069696|ENSG00000175609|ENSG00000176879|ENSG00000176900|ENSG00000176904|ENSG00000176937|ENSG00000188069|ENSG00000197790|ENSG00000182170|ENSG00000176922|ENSG00000176951|ENSG00000197428|ENSG00000197674|ENSG00000184350|ENSG00000167332|ENSG00000176798|ENSG00000171999|ENSG00000180785|ENSG00000181963|ENSG00000176925|ENSG00000196778|	0.047415
2-chr11-2500000-7500000	G-protein coupled receptor activity	ENSG00000184698|ENSG00000184881|ENSG00000176893|ENSG00000176895|ENSG00000167355|ENSG00000170782|ENSG00000167359|ENSG00000175609|ENSG00000180923|ENSG00000181009|ENSG00000183251|ENSG00000176787|ENSG00000176879|ENSG00000181074|ENSG00000181001|ENSG00000181609|ENSG00000187918|ENSG00000176900|ENSG00000180909|ENSG00000176904|ENSG00000176937|ENSG00000188069|ENSG00000180913|ENSG00000180919|ENSG00000197790…	0.0381581
3-chr11-5000000-10000000	G-protein coupled receptor activity	ENSG00000184698|ENSG00000184881|ENSG00000167355|ENSG00000170782|ENSG00000167359|ENSG00000180923|ENSG00000181009|ENSG00000183251|ENSG00000176787|ENSG00000181074|ENSG00000181001|ENSG00000170683|ENSG00000181609|ENSG00000187918|ENSG00000180909|ENSG00000170688|ENSG00000182334|ENSG00000180913|ENSG00000180919|ENSG00000183313|ENSG00000181616|ENSG00000176748|ENSG00000180974|ENSG00000167360|ENSG00000176239…	0.00125632
7-chr11-15000000-20000000	lactate dehydrogenase activity	ENSG00000134333|ENSG00000151116|ENSG00000166800|ENSG00000166796|	0.0213039
8-chr11-17500000-22500000	lactate dehydrogenase activity	ENSG00000134333|ENSG00000151116|ENSG00000166800|ENSG00000166796|	0.010052
20-chr11-47500000-52500000	G-protein coupled receptor activity	ENSG00000186483|ENSG00000176537|ENSG00000185926|ENSG00000176555|ENSG00000178306|ENSG00000176540|ENSG00000176547|ENSG00000175619|ENSG00000109920|ENSG00000176567|ENSG00000172208|	2.92873e-05
21-chr11-50000000-55000000	G-protein coupled receptor activity	ENSG00000186483|ENSG00000181950|ENSG00000181958|ENSG00000176537|ENSG00000185926|ENSG00000181961|	7.30127e-05
22-chr11-52500000-57500000	G-protein coupled receptor activity	ENSG00000149133|ENSG00000172459|ENSG00000172457|ENSG00000181903|ENSG00000172199|ENSG00000172489|ENSG00000172487|ENSG00000166693|ENSG00000181689|ENSG00000172188|ENSG00000181950|ENSG00000184741|ENSG00000186113|ENSG00000181282|ENSG00000181698|ENSG00000172154|ENSG00000181837|ENSG00000181958|ENSG00000174937|ENSG00000186119|ENSG00000181935|ENSG00000181296|ENSG00000181943|ENSG00000198877|ENSG00000186124…	0.0119081
23-chr11-55000000-60000000	G-protein coupled receptor activity	ENSG00000172774|ENSG00000172772|ENSG00000149133|ENSG00000172459|ENSG00000172457|ENSG00000186509|ENSG00000172289|ENSG00000172381|ENSG00000176200|ENSG00000176205|ENSG00000181903|ENSG00000172199|ENSG00000172489|ENSG00000172487|ENSG00000166884|ENSG00000198283|ENSG00000166693|ENSG00000181689|ENSG00000172188|ENSG00000184741|ENSG00000186113|ENSG00000181282|ENSG00000181698|ENSG00000172154|ENSG00000180475…	0.0119081
24-chr11-57500000-62500000	G-protein coupled receptor activity	ENSG00000172774|ENSG00000172772|ENSG00000186509|ENSG00000172289|ENSG00000172381|ENSG00000176200|ENSG00000176205|ENSG00000166884|ENSG00000198283|ENSG00000168539|ENSG00000180475|ENSG00000197887|ENSG00000172377|ENSG00000183134|ENSG00000172365|ENSG00000172362|ENSG00000172320|ENSG00000172769|ENSG00000172324|ENSG00000172742|ENSG00000186513|ENSG00000176495|ENSG00000198261|ENSG00000196779|	3.26159e-05
40-chr11-97500000-102500000	transition metal ion binding	ENSG00000137745|ENSG00000110330|ENSG00000137673|ENSG00000137674|ENSG00000118113|ENSG00000149968|ENSG00000196611|ENSG00000166670|ENSG00000110347|ENSG00000023445|	3.1592e-09
40-chr11-97500000-102500000	endopeptidase activity	ENSG00000137745|ENSG00000137673|ENSG00000137675|ENSG00000137674|ENSG00000118113|ENSG00000149968|ENSG00000196611|ENSG00000166670|ENSG00000110347|	0.00503965
40-chr11-97500000-102500000	calcium ion binding	ENSG00000137745|ENSG00000137673|ENSG00000137672|ENSG00000137674|ENSG00000118113|ENSG00000149968|ENSG00000196611|ENSG00000166670|ENSG00000110347|	0.0129315
40-chr11-97500000-102500000	metallopeptidase activity	ENSG00000137745|ENSG00000137673|ENSG00000137675|ENSG00000137674|ENSG00000118113|ENSG00000149968|ENSG00000196611|ENSG00000166670|ENSG00000110347|	0.00161872
41-chr11-100000000-105000000	endopeptidase activity	ENSG00000137745|ENSG00000137673|ENSG00000118168|ENSG00000137675|ENSG00000137674|ENSG00000118113|ENSG00000149968|ENSG00000196611|ENSG00000166670|ENSG00000110347|ENSG00000196954|ENSG00000137757|ENSG00000137752|ENSG00000170967|	2.47048e-05
41-chr11-100000000-105000000	calcium ion binding	ENSG00000137745|ENSG00000137673|ENSG00000137672|ENSG00000137674|ENSG00000118113|ENSG00000149968|ENSG00000196611|ENSG00000166670|ENSG00000110347|	4.50337e-06
41-chr11-100000000-105000000	metallopeptidase activity	ENSG00000137745|ENSG00000137673|ENSG00000137675|ENSG00000137674|ENSG00000118113|ENSG00000149968|ENSG00000196611|ENSG00000166670|ENSG00000110347|	0.0026058
42-chr11-102500000-107500000	cysteine-type peptidase activity	ENSG00000118168|ENSG00000196954|ENSG00000137757|ENSG00000137752|	0.00213336
49-chr11-120000000-125000000	G-protein coupled receptor activity	ENSG00000181457|ENSG00000197309|ENSG00000196099|ENSG00000181518|ENSG00000197849|ENSG00000181499|ENSG00000198674|ENSG00000196661|ENSG00000173365|ENSG00000196341|ENSG00000196403|ENSG00000196248|ENSG00000196703|ENSG00000181214|ENSG00000171014|ENSG00000182634|ENSG00000186268|ENSG00000198657|ENSG00000197263|ENSG00000196119|ENSG00000197125|ENSG00000170953|	8.87554e-06
50-chr11-122500000-127500000	G-protein coupled receptor activity	ENSG00000181457|ENSG00000197309|ENSG00000196099|ENSG00000181518|ENSG00000197849|ENSG00000181499|ENSG00000198674|ENSG00000196661|ENSG00000173365|ENSG00000196341|ENSG00000196403|ENSG00000196248|ENSG00000196703|ENSG00000181214|ENSG00000171014|ENSG00000182634|ENSG00000186268|ENSG00000198657|ENSG00000197263|ENSG00000196119|ENSG00000197125|ENSG00000170953|	2.36291e-05
4-chr12-7500000-12500000	monosaccharide transporter activity	ENSG00000173262|ENSG00000059804|ENSG00000003056|	0.0191369
5-chr12-10000000-15000000	G-protein coupled receptor activity	ENSG00000173342|ENSG00000121377|ENSG00000111291|ENSG00000197870|ENSG00000013588|ENSG00000183150|ENSG00000134551|ENSG00000186136|ENSG00000121318|ENSG00000196229|ENSG00000121314|ENSG00000121381|ENSG00000183935|	0.00682777
8-chr12-17500000-22500000	organic anion transporter activity	ENSG00000134538|ENSG00000084453|ENSG00000111700|	0.00229096
9-chr12-20000000-25000000	organic anion transporter activity	ENSG00000134538|ENSG00000084453|ENSG00000111700|	2.07522e-05
19-chr12-45000000-50000000	water channel activity	ENSG00000167580|ENSG00000161798|ENSG00000086159|	2.47877e-05
20-chr12-47500000-52500000	water channel activity	ENSG00000167580|ENSG00000161798|ENSG00000086159|	0.0455578
7-chr13-15000000-20000000	gap-junction forming channel activity	ENSG00000121742|ENSG00000121743|ENSG00000165474|	0.0119081
8-chr13-17500000-22500000	gap-junction forming channel activity	ENSG00000121742|ENSG00000121743|ENSG00000165474|	2.32297e-27
7-chr14-15000000-20000000	G-protein coupled receptor activity	ENSG00000169484|ENSG00000169488|ENSG00000176299|ENSG00000176294|ENSG00000182652|ENSG00000176230|ENSG00000176246|ENSG00000176253|ENSG00000155249|ENSG00000176198|ENSG00000196832|ENSG00000186445|ENSG00000176281|ENSG00000196143|ENSG00000165762|ENSG00000176312|ENSG00000184394|ENSG00000176213|ENSG00000176219|	9.61689e-31
8-chr14-17500000-22500000	G-protein coupled receptor activity	ENSG00000181803|ENSG00000169484|ENSG00000169488|ENSG00000176299|ENSG00000176294|ENSG00000182652|ENSG00000176230|ENSG00000176246|ENSG00000165804|ENSG00000169327|ENSG00000176253|ENSG00000155249|ENSG00000176198|ENSG00000169208|ENSG00000196832|ENSG00000186445|ENSG00000169202|ENSG00000176281|ENSG00000196143|ENSG00000165762|ENSG00000176312|ENSG00000172611|ENSG00000184394|ENSG00000176213|ENSG00000176219|	0.000648109
8-chr14-17500000-22500000	nuclease activity	ENSG00000169385|ENSG00000169413|ENSG00000100823|ENSG00000136315|ENSG00000173464|ENSG00000129538|ENSG00000173431|ENSG00000188655|ENSG00000182545|ENSG00000165799|ENSG00000181552|ENSG00000169397|ENSG00000181784|ENSG00000181562|	5.47345e-08
9-chr14-20000000-25000000	nuclease activity	ENSG00000169385|ENSG00000169413|ENSG00000136315|ENSG00000173464|ENSG00000129538|ENSG00000173431|ENSG00000188655|ENSG00000182545|ENSG00000165799|ENSG00000181552|ENSG00000169397|ENSG00000181784|ENSG00000181562|	5.83418e-05
37-chr14-90000000-95000000	endopeptidase inhibitor activity	ENSG00000165951|ENSG00000165953|ENSG00000170099|ENSG00000187483|ENSG00000197249|ENSG00000100665|ENSG00000170054|ENSG00000186910|ENSG00000196136|ENSG00000140093|ENSG00000188488|	5.14393e-05
38-chr14-92500000-97500000	endopeptidase inhibitor activity	ENSG00000165951|ENSG00000165953|ENSG00000170099|ENSG00000187483|ENSG00000197249|ENSG00000100665|ENSG00000170054|ENSG00000186910|ENSG00000196136|ENSG00000140093|ENSG00000188488|	4.06424e-09
9-chr15-20000000-25000000	GABA receptor activity	ENSG00000186297|ENSG00000182256|ENSG00000166206|	5.09233e-06
10-chr15-22500000-27500000	GABA receptor activity	ENSG00000186297|ENSG00000182256|ENSG00000166206|	3.79191e-13
16-chr15-37500000-42500000	carboxylic ester hydrolase activity	ENSG00000159337|ENSG00000167004|ENSG00000188089|ENSG00000168970|ENSG00000168907|ENSG00000137841|	9.77325e-14
31-chr15-75000000-80000000	acetylcholine receptor activity	ENSG00000080644|ENSG00000117971|ENSG00000169684|	1.08871e-17
1-chr16-0-5000000	serine-type peptidase activity	ENSG00000172382|ENSG00000103355|ENSG00000103269|ENSG00000172460|ENSG00000007038|ENSG00000172236|ENSG00000005001|ENSG00000116176|ENSG00000095917|ENSG00000186731|	1.02819e-12
3-chr17-5000000-10000000	oxidoreductase activity, acting on single donors with incorporation of molecular oxygen, incorporation of two atoms of oxygen	ENSG00000108839|ENSG00000179593|ENSG00000179477|ENSG00000179148|	1.00973e-13
4-chr17-7500000-12500000	actin binding	ENSG00000006788|ENSG00000125414|ENSG00000109063|ENSG00000109061|ENSG00000133026|ENSG00000133020|ENSG00000141048|	2.49639e-14
4-chr17-7500000-12500000	adenyl nucleotide binding	ENSG00000006788|ENSG00000170004|ENSG00000125414|ENSG00000109063|ENSG00000109061|ENSG00000132518|ENSG00000065559|ENSG00000141510|ENSG00000178921|ENSG00000178999|ENSG00000007174|ENSG00000133026|ENSG00000133020|ENSG00000141048|	1.93004e-18
5-chr17-10000000-15000000	actin binding	ENSG00000006788|ENSG00000125414|ENSG00000109063|ENSG00000109061|ENSG00000133020|ENSG00000141048|	3.20133e-13
11-chr17-25000000-30000000	chemokine receptor binding	ENSG00000108688|ENSG00000172156|ENSG00000108700|ENSG00000108702|ENSG00000108691|ENSG00000181374|	0.0115232
11-chr17-25000000-30000000	chemokine activity	ENSG00000108688|ENSG00000172156|ENSG00000108700|ENSG00000108702|ENSG00000108691|ENSG00000181374|	0.000477806
12-chr17-27500000-32500000	chemokine receptor binding	ENSG00000108688|ENSG00000167236|ENSG00000161573|ENSG00000161570|ENSG00000161574|ENSG00000172156|ENSG00000108700|ENSG00000108702|ENSG00000129277|ENSG00000108691|ENSG00000006074|ENSG00000006075|ENSG00000181374|	0.00213336
12-chr17-27500000-32500000	chemokine activity	ENSG00000108688|ENSG00000167236|ENSG00000161573|ENSG00000161570|ENSG00000161574|ENSG00000172156|ENSG00000108700|ENSG00000108702|ENSG00000129277|ENSG00000108691|ENSG00000006074|ENSG00000006075|ENSG00000181374|	0.0324547
13-chr17-30000000-35000000	chemokine receptor binding	ENSG00000167236|ENSG00000161573|ENSG00000161570|ENSG00000161574|ENSG00000129277|ENSG00000006074|ENSG00000006075|	4.50923e-06
13-chr17-30000000-35000000	chemokine activity	ENSG00000167236|ENSG00000161573|ENSG00000161570|ENSG00000161574|ENSG00000129277|ENSG00000006074|ENSG00000006075|	1.74103e-11
18-chr17-42500000-47500000	transcription factor activity	ENSG00000082641|ENSG00000108813|ENSG00000159184|ENSG00000120093|ENSG00000120094|ENSG00000120075|ENSG00000182742|ENSG00000170689|ENSG00000064195|ENSG00000108511|ENSG00000173917|ENSG00000120068|ENSG00000120087|ENSG00000136504|ENSG00000073861|	0.00074474
10-chr18-22500000-27500000	calcium ion binding	ENSG00000175065|ENSG00000118276|ENSG00000134760|ENSG00000134762|ENSG00000134765|ENSG00000046604|ENSG00000170558|ENSG00000134755|ENSG00000134757|	1.91469e-08
11-chr18-25000000-30000000	calcium ion binding	ENSG00000175065|ENSG00000118276|ENSG00000134760|ENSG00000134762|ENSG00000134765|ENSG00000046604|ENSG00000134755|ENSG00000134757|	0.0019113
12-chr18-27500000-32500000	transition metal ion binding	ENSG00000141429|ENSG00000134769|ENSG00000186496|ENSG00000186812|ENSG00000186814|ENSG00000134758|ENSG00000118267|ENSG00000141434|ENSG00000101695|ENSG00000172466|	0.0119081
16-chr18-37500000-42500000	urea transporter activity	ENSG00000132874|ENSG00000141469|	0.0156051
17-chr18-40000000-45000000	urea transporter activity	ENSG00000132874|ENSG00000141469|	2.52653e-06
19-chr18-45000000-50000000	sequence-specific DNA binding	ENSG00000141644|ENSG00000154832|ENSG00000134046|	0.036543
23-chr18-55000000-60000000	endopeptidase inhibitor activity	ENSG00000197641|ENSG00000197632|ENSG00000166634|ENSG00000166401|ENSG00000166404|ENSG00000166396|ENSG00000057149|	5.40228e-09
24-chr18-57500000-62500000	endopeptidase inhibitor activity	ENSG00000197641|ENSG00000197632|ENSG00000166634|ENSG00000166401|ENSG00000166404|ENSG00000166396|ENSG00000057149|	0.000671825
1-chr19-0-5000000	serine-type peptidase activity	ENSG00000196415|ENSG00000197766|ENSG00000185198|ENSG00000142002|ENSG00000172232|ENSG00000115257|ENSG00000197540|ENSG00000178297|ENSG00000197561|	6.89475e-05
4-chr19-7500000-12500000	transition metal ion binding	ENSG00000130803|ENSG00000102575|ENSG00000196646|ENSG00000197647|ENSG00000196484|ENSG00000196757|ENSG00000198028|ENSG00000198342|ENSG00000142303|ENSG00000198551|ENSG00000177599|ENSG00000197332|ENSG00000171469|ENSG00000171466|ENSG00000197044|ENSG00000197933|ENSG00000161914|ENSG00000167807|ENSG00000196826|ENSG00000133250|ENSG00000099785|ENSG00000188629|ENSG00000197961|ENSG00000188321|ENSG00000132010…	0.0119869
6-chr19-12500000-17500000	G-protein coupled receptor activity	ENSG00000127529|ENSG00000123146|ENSG00000171936|ENSG00000094661|ENSG00000127507|ENSG00000185385|ENSG00000186723|ENSG00000176938|ENSG00000176231|ENSG00000176923|ENSG00000127530|ENSG00000127533|ENSG00000172148|ENSG00000172519|ENSG00000171942|ENSG00000072071|ENSG00000188269|ENSG00000160951|ENSG00000127515|ENSG00000131355|	0.000101181
9-chr19-20000000-25000000	transition metal ion binding	ENSG00000197020|ENSG00000167232|ENSG00000198521|ENSG00000104777|ENSG00000196268|ENSG00000196172|ENSG00000196350|ENSG00000197360|ENSG00000160352|ENSG00000183850|ENSG00000105750|ENSG00000197372|ENSG00000196705|ENSG00000160229|ENSG00000196686|ENSG00000118620|ENSG00000197134|	0.000447621
10-chr19-22500000-27500000	transition metal ion binding	ENSG00000167232|ENSG00000196172|ENSG00000196350|ENSG00000197360|ENSG00000183850|ENSG00000197372|ENSG00000196686|	0.00010866
16-chr19-37500000-42500000	transition metal ion binding	ENSG00000161298|ENSG00000089335|ENSG00000142065|ENSG00000181007|ENSG00000105261|ENSG00000186017|ENSG00000142279|ENSG00000196357|ENSG00000189042|ENSG00000105258|ENSG00000197800|ENSG00000198453|ENSG00000196761|ENSG00000197808|ENSG00000153896|ENSG00000188283|ENSG00000180884|ENSG00000185869|ENSG00000196967|ENSG00000105663|ENSG00000168813|ENSG00000168661|ENSG00000167637|ENSG00000167635|ENSG00000186020…	0.000542732
17-chr19-40000000-45000000	transition metal ion binding	ENSG00000161298|ENSG00000142065|ENSG00000181007|ENSG00000105261|ENSG00000186017|ENSG00000196437|ENSG00000011332|ENSG00000198182|ENSG00000171817|ENSG00000181666|ENSG00000189144|ENSG00000180479|ENSG00000196357|ENSG00000189042|ENSG00000105258|ENSG00000197800|ENSG00000198453|ENSG00000196761|ENSG00000197808|ENSG00000120784|ENSG00000188283|ENSG00000171827|ENSG00000180884|ENSG00000185869|ENSG00000196967…	0.00793625
18-chr19-42500000-47500000	oxidoreductase activity, acting on paired donors, with incorporation or reduction of molecular oxygen, reduced flavin or flavoprotein as one donor, and incorporation of one atom of oxygen	ENSG00000167600|ENSG00000197408|ENSG00000197446|ENSG00000198077|ENSG00000197573|ENSG00000197838|	2.67331e-07
19-chr19-45000000-50000000	oxidoreductase activity, acting on paired donors, with incorporation or reduction of molecular oxygen, reduced flavin or flavoprotein as one donor, and incorporation of one atom of oxygen	ENSG00000167600|ENSG00000197408|ENSG00000197446|ENSG00000198077|ENSG00000197573|ENSG00000197838|	3.07007e-07
19-chr19-45000000-50000000	transition metal ion binding	ENSG00000178386|ENSG00000176472|ENSG00000018607|ENSG00000062370|ENSG00000167600|ENSG00000187187|ENSG00000184280|ENSG00000186019|ENSG00000130612|ENSG00000197782|ENSG00000197408|ENSG00000142273|ENSG00000176232|ENSG00000159885|ENSG00000159882|ENSG00000105732|ENSG00000131115|ENSG00000131116|ENSG00000124459|ENSG00000167383|ENSG00000167380|ENSG00000167384|ENSG00000167625|ENSG00000124444|ENSG00000197446…	0.00128029
20-chr19-47500000-52500000	transition metal ion binding	ENSG00000178386|ENSG00000176472|ENSG00000018607|ENSG00000062370|ENSG00000184280|ENSG00000170684|ENSG00000186019|ENSG00000188425|ENSG00000142273|ENSG00000176232|ENSG00000159885|ENSG00000159882|ENSG00000131115|ENSG00000131116|ENSG00000124459|ENSG00000167383|ENSG00000167380|ENSG00000167384|ENSG00000124444|ENSG00000011485|ENSG00000186026|ENSG00000159905|ENSG00000159904|ENSG00000159917|ENSG00000159915|	0.00764035
22-chr19-52500000-57500000	serine-type peptidase activity	ENSG00000129451|ENSG00000174562|ENSG00000129455|ENSG00000142515|ENSG00000167748|ENSG00000167749|ENSG00000129437|ENSG00000169035|ENSG00000186474|ENSG00000167759|ENSG00000167755|ENSG00000167754|ENSG00000167757|ENSG00000167751|	0.00086561
22-chr19-52500000-57500000	endopeptidase activity	ENSG00000129451|ENSG00000174562|ENSG00000129455|ENSG00000142515|ENSG00000167748|ENSG00000167749|ENSG00000129437|ENSG00000169035|ENSG00000131400|ENSG00000131401|ENSG00000186474|ENSG00000167759|ENSG00000167755|ENSG00000167754|ENSG00000167757|ENSG00000167751|	0.00764035
23-chr19-55000000-60000000	serine-type peptidase activity	ENSG00000129451|ENSG00000174562|ENSG00000129455|ENSG00000142515|ENSG00000167748|ENSG00000167749|ENSG00000129437|ENSG00000169035|ENSG00000186474|ENSG00000167759|ENSG00000167755|ENSG00000167754|ENSG00000167757|ENSG00000167751|	6.69732e-19
23-chr19-55000000-60000000	endopeptidase activity	ENSG00000129451|ENSG00000174562|ENSG00000129455|ENSG00000142515|ENSG00000167748|ENSG00000167749|ENSG00000129437|ENSG00000169035|ENSG00000131400|ENSG00000131401|ENSG00000186474|ENSG00000167759|ENSG00000167755|ENSG00000167754|ENSG00000167757|ENSG00000167751|	6.69732e-19
24-chr19-57500000-62500000	transition metal ion binding	ENSG00000198046|ENSG00000171425|ENSG00000196417|ENSG00000018869|ENSG00000197025|ENSG00000197951|ENSG00000142409|ENSG00000196867|ENSG00000142396|ENSG00000196263|ENSG00000130844|ENSG00000197497|ENSG00000198440|ENSG00000167562|ENSG00000197714|ENSG00000170949|ENSG00000197937|ENSG00000198300|ENSG00000141946|ENSG00000198304|ENSG00000127903|ENSG00000167554|ENSG00000189190|ENSG00000167766|ENSG00000179922…	5.20913e-13
25-chr19-60000000-65000000	transition metal ion binding	ENSG00000198046|ENSG00000152475|ENSG00000186272|ENSG00000119574|ENSG00000171425|ENSG00000083828|ENSG00000181894|ENSG00000018869|ENSG00000173480|ENSG00000197025|ENSG00000171606|ENSG00000197951|ENSG00000176293|ENSG00000121406|ENSG00000142409|ENSG00000196867|ENSG00000196263|ENSG00000121417|ENSG00000130726|ENSG00000121413|ENSG00000198440|ENSG00000197714|ENSG00000178935|ENSG00000152433|ENSG00000182318…	5.20913e-13
26-chr19-62500000-67500000	transition metal ion binding	ENSG00000152475|ENSG00000186272|ENSG00000119574|ENSG00000083828|ENSG00000181894|ENSG00000173480|ENSG00000171606|ENSG00000176293|ENSG00000121406|ENSG00000121417|ENSG00000130726|ENSG00000121413|ENSG00000178935|ENSG00000152433|ENSG00000182318|ENSG00000152443|ENSG00000186230|ENSG00000180532|ENSG00000166704|ENSG00000152454|ENSG00000152467|ENSG00000099326|ENSG00000131845|ENSG00000131849|ENSG00000105132…	1.58392e-05
9-chr20-20000000-25000000	endopeptidase inhibitor activity	ENSG00000173335|ENSG00000101439|ENSG00000101441|ENSG00000101435|ENSG00000125823|ENSG00000125831|ENSG00000125815|ENSG00000077984|ENSG00000170373|ENSG00000170369|ENSG00000170367|	7.95629e-05
10-chr20-22500000-27500000	endopeptidase inhibitor activity	ENSG00000173335|ENSG00000101439|ENSG00000101441|ENSG00000101435|ENSG00000125823|ENSG00000125831|ENSG00000125815|ENSG00000077984|ENSG00000170373|ENSG00000170369|ENSG00000170367|	0.0103307
17-chr20-40000000-45000000	endopeptidase inhibitor activity	ENSG00000175121|ENSG00000168703|ENSG00000124116|ENSG00000101448|ENSG00000101443|ENSG00000149651|ENSG00000149653|ENSG00000180305|ENSG00000158901|ENSG00000124107|ENSG00000124102|ENSG00000168630|	0.00519612
18-chr20-42500000-47500000	endopeptidase inhibitor activity	ENSG00000175121|ENSG00000168703|ENSG00000124116|ENSG00000101448|ENSG00000101443|ENSG00000149651|ENSG00000149653|ENSG00000180305|ENSG00000158901|ENSG00000124107|ENSG00000124102|ENSG00000168630|	0.00118123
13-chr21-30000000-35000000	interferon binding	ENSG00000159110|ENSG00000159128|ENSG00000142166|	0.000299266
13-chr21-30000000-35000000	hematopoietin/interferon-class (D200-domain) cytokine receptor activity	ENSG00000159113|ENSG00000159110|ENSG00000159128|ENSG00000142166|	0.00123577
14-chr21-32500000-37500000	interferon binding	ENSG00000159110|ENSG00000159128|ENSG00000142166|	3.47329e-05
14-chr21-32500000-37500000	hematopoietin/interferon-class (D200-domain) cytokine receptor activity	ENSG00000159113|ENSG00000159110|ENSG00000159128|ENSG00000142166|	5.40228e-09
9-chr22-20000000-25000000	transferase activity, transferring amino-acyl groups	ENSG00000099998|ENSG00000100031|ENSG00000100121|	4.58202e-05
15-chr22-35000000-40000000	hydrolase activity, acting on carbon-nitrogen (but not peptide) bonds, in cyclic amidines	ENSG00000100298|ENSG00000128394|ENSG00000179750|ENSG00000198904|ENSG00000128383|	0.00835284
16-chr22-37500000-42500000	hydrolase activity, acting on carbon-nitrogen (but not peptide) bonds, in cyclic amidines	ENSG00000100298|ENSG00000128394|ENSG00000179750|ENSG00000198904|ENSG00000128383|	0.0466597
1-chrX-0-5000000	sulfuric ester hydrolase activity	ENSG00000157399|ENSG00000006756|ENSG00000062096|	9.13297e-06
2-chrX-2500000-7500000	sulfuric ester hydrolase activity	ENSG00000101846|ENSG00000157399|ENSG00000006756|ENSG00000062096|	0.00171057
31-chrX-75000000-80000000	nucleotide receptor activity	ENSG00000078589|ENSG00000147138|ENSG00000147145|	0.0238361
32-chrX-77500000-82500000	nucleotide receptor activity	ENSG00000078589|ENSG00000147138|ENSG00000147145|	0.00213576
40-chrX-97500000-102500000	translation elongation factor activity	ENSG00000180964|ENSG00000184905|ENSG00000182916|	0.0409367
41-chrX-100000000-105000000	translation elongation factor activity	ENSG00000180964|ENSG00000184905|ENSG00000182916|ENSG00000133142|ENSG00000196507|ENSG00000172465|	0.0229129
42-chrX-102500000-107500000	translation elongation factor activity	ENSG00000133142|ENSG00000196507|ENSG00000172465|	9.55075e-06
7-chr1-15000000-20000000	hydrolase activity, acting on carbon-nitrogen (but not peptide) bonds	ENSG00000159339|ENSG00000197996|ENSG00000142619|ENSG00000116771|ENSG00000142623|ENSG00000117115|	1.69425e-14
18-chr1-42500000-47500000	heme binding	ENSG00000154198|ENSG00000142973|ENSG00000162365|ENSG00000186160|ENSG00000186377|ENSG00000187048|	5.14904e-13
18-chr1-42500000-47500000	monooxygenase activity	ENSG00000154198|ENSG00000142973|ENSG00000162365|ENSG00000186160|ENSG00000186377|ENSG00000187048|	6.12789e-07
19-chr1-45000000-50000000	heme binding	ENSG00000154198|ENSG00000142973|ENSG00000162365|ENSG00000186160|ENSG00000186377|ENSG00000187048|	4.23639e-07
19-chr1-45000000-50000000	monooxygenase activity	ENSG00000154198|ENSG00000142973|ENSG00000162365|ENSG00000186160|ENSG00000186377|ENSG00000187048|	2.09146e-06
41-chr1-100000000-105000000	hydrolase activity, acting on glycosyl bonds	ENSG00000162688|ENSG00000196318|ENSG00000187733|ENSG00000174876|ENSG00000197839|ENSG00000051415|	4.54712e-06
42-chr1-102500000-107500000	hydrolase activity, acting on glycosyl bonds	ENSG00000196318|ENSG00000187733|ENSG00000174876|ENSG00000197839|ENSG00000051415|	0.00257559
44-chr1-107500000-112500000	transferase activity, transferring alkyl or aryl (other than methyl) groups	ENSG00000134184|ENSG00000134202|ENSG00000134201|ENSG00000168765|	0.00124938
45-chr1-110000000-115000000	transferase activity, transferring alkyl or aryl (other than methyl) groups	ENSG00000134184|ENSG00000134202|ENSG00000134201|ENSG00000168765|	8.67318e-06
48-chr1-117500000-122500000	oxidoreductase activity, acting on CH-OH group of donors	ENSG00000116882|ENSG00000187481|ENSG00000198857|ENSG00000092621|	7.10288e-06
62-chr1-152500000-157500000	transmembrane receptor activity	ENSG00000180433|ENSG00000143590|ENSG00000188340|ENSG00000186400|ENSG00000186306|ENSG00000158477|ENSG00000198703|ENSG00000197403|ENSG00000173285|ENSG00000196171|ENSG00000198965|ENSG00000198967|ENSG00000186440|ENSG00000180409|ENSG00000198400|ENSG00000027644|ENSG00000197532|ENSG00000073754|ENSG00000160712|ENSG00000173080|ENSG00000160716|ENSG00000143620|	0.0279394
63-chr1-155000000-160000000	immunoglobulin binding	ENSG00000158869|ENSG00000179639|ENSG00000143226|ENSG00000162747|ENSG00000072694|	0.000694577
63-chr1-155000000-160000000	transmembrane receptor activity	ENSG00000158869|ENSG00000180433|ENSG00000188340|ENSG00000158731|ENSG00000186400|ENSG00000184155|ENSG00000186306|ENSG00000117090|ENSG00000158477|ENSG00000198703|ENSG00000197403|ENSG00000173285|ENSG00000196171|ENSG00000198965|ENSG00000198967|ENSG00000186440|ENSG00000180409|ENSG00000198400|ENSG00000027644|ENSG00000196184|ENSG00000197532|ENSG00000073754|	0.00196843
64-chr1-157500000-162500000	immunoglobulin binding	ENSG00000158869|ENSG00000179639|ENSG00000143226|ENSG00000162747|ENSG00000072694|	0.0289845
67-chr1-165000000-170000000	monooxygenase activity	ENSG00000094963|ENSG00000007933|ENSG00000117507|ENSG00000076258|ENSG00000010932|	0.00108807
67-chr1-165000000-170000000	oxidoreductase activity, acting on paired donors, with incorporation or reduction of molecular oxygen	ENSG00000094963|ENSG00000007933|ENSG00000117507|ENSG00000076258|ENSG00000010932|	0.00150272
68-chr1-167500000-172500000	monooxygenase activity	ENSG00000094963|ENSG00000007933|ENSG00000117507|ENSG00000076258|ENSG00000010932|	1.38291e-24
68-chr1-167500000-172500000	oxidoreductase activity, acting on paired donors, with incorporation or reduction of molecular oxygen	ENSG00000094963|ENSG00000007933|ENSG00000117507|ENSG00000076258|ENSG00000010932|	1.58956e-25
98-chr1-242500000-247500000	transmembrane receptor activity	ENSG00000169214|ENSG00000177186|ENSG00000177212|ENSG00000196936|ENSG00000196944|ENSG00000177476|ENSG00000177174|ENSG00000196071|ENSG00000187080|ENSG00000177489|ENSG00000196079|ENSG00000198281|ENSG00000177535|ENSG00000171180|ENSG00000196539|ENSG00000198601|ENSG00000198118|ENSG00000183310|ENSG00000182783|ENSG00000183130|ENSG00000188558|ENSG00000197454|ENSG00000197591|ENSG00000153230|ENSG00000184022…	0.0123193
99-chr1-245000000-250000000	transmembrane receptor activity	ENSG00000169214|ENSG00000177186|ENSG00000177212|ENSG00000196936|ENSG00000196944|ENSG00000177476|ENSG00000177174|ENSG00000196071|ENSG00000187080|ENSG00000177489|ENSG00000196079|ENSG00000198281|ENSG00000177535|ENSG00000171180|ENSG00000196539|ENSG00000198601|ENSG00000198118|ENSG00000183310|ENSG00000182783|ENSG00000183130|ENSG00000188558|ENSG00000197454|ENSG00000197591|ENSG00000153230|ENSG00000184022…	0.0100076
31-chr2-75000000-80000000	sugar binding	ENSG00000172023|ENSG00000115386|ENSG00000143954|ENSG00000172016|	3.01611e-05
32-chr2-77500000-82500000	sugar binding	ENSG00000172023|ENSG00000115386|ENSG00000143954|ENSG00000172016|	0.00040463
40-chr2-97500000-102500000	growth factor binding	ENSG00000115602|ENSG00000115604|ENSG00000115594|ENSG00000115590|ENSG00000115598|	6.89025e-05
40-chr2-97500000-102500000	cytokine binding	ENSG00000115602|ENSG00000115604|ENSG00000115594|ENSG00000115590|ENSG00000115598|	1.60659e-05
41-chr2-100000000-105000000	growth factor binding	ENSG00000115602|ENSG00000115604|ENSG00000115594|ENSG00000115590|ENSG00000115598|	0.0191369
41-chr2-100000000-105000000	cytokine binding	ENSG00000115602|ENSG00000115604|ENSG00000115594|ENSG00000115590|ENSG00000115598|	0.01017
45-chr2-110000000-115000000	receptor antagonist activity	ENSG00000125571|ENSG00000136689|ENSG00000136688|ENSG00000136696|ENSG00000136697|ENSG00000136694|ENSG00000136695|	0.00267278
45-chr2-110000000-115000000	receptor regulator activity	ENSG00000125571|ENSG00000136689|ENSG00000136688|ENSG00000136696|ENSG00000136697|ENSG00000136694|ENSG00000136695|	0.0271813
45-chr2-110000000-115000000	receptor binding	ENSG00000125538|ENSG00000125571|ENSG00000115008|ENSG00000136689|ENSG00000136688|ENSG00000136696|ENSG00000136697|ENSG00000136694|ENSG00000136695|	0.00559132
45-chr2-110000000-115000000	cytokine activity	ENSG00000125538|ENSG00000125571|ENSG00000115008|ENSG00000136689|ENSG00000136688|ENSG00000136696|ENSG00000136697|ENSG00000136694|ENSG00000136695|	0.00415204
45-chr2-110000000-115000000	growth factor activity	ENSG00000125538|ENSG00000125571|ENSG00000115008|ENSG00000136689|ENSG00000136688|ENSG00000136696|ENSG00000136697|ENSG00000136694|ENSG00000136695|	2.52653e-06
46-chr2-112500000-117500000	receptor antagonist activity	ENSG00000125571|ENSG00000136689|ENSG00000136688|ENSG00000136696|ENSG00000136697|ENSG00000136694|ENSG00000136695|	9.58217e-41
46-chr2-112500000-117500000	receptor regulator activity	ENSG00000125571|ENSG00000136689|ENSG00000136688|ENSG00000136696|ENSG00000136697|ENSG00000136694|ENSG00000136695|	3.10238e-27
46-chr2-112500000-117500000	receptor binding	ENSG00000125538|ENSG00000125571|ENSG00000115008|ENSG00000136689|ENSG00000136688|ENSG00000136696|ENSG00000136697|ENSG00000136694|ENSG00000136695|	1.69479e-05
46-chr2-112500000-117500000	cytokine activity	ENSG00000125538|ENSG00000125571|ENSG00000115008|ENSG00000136689|ENSG00000136688|ENSG00000136696|ENSG00000136697|ENSG00000136694|ENSG00000136695|	1.46449e-05
46-chr2-112500000-117500000	growth factor activity	ENSG00000125538|ENSG00000125571|ENSG00000115008|ENSG00000136689|ENSG00000136688|ENSG00000136696|ENSG00000136697|ENSG00000136694|ENSG00000136695|	3.6523e-05
70-chr2-172500000-177500000	DNA binding	ENSG00000170178|ENSG00000138433|ENSG00000128709|ENSG00000170166|ENSG00000115844|ENSG00000144355|ENSG00000128652|ENSG00000115966|ENSG00000128645|ENSG00000174279|ENSG00000175879|ENSG00000196285|ENSG00000172845|ENSG00000128714|ENSG00000128710|ENSG00000128713|	0.01017
91-chr2-225000000-230000000	folic acid binding	ENSG00000042304|ENSG00000135917|	2.49982e-47
5-chr3-10000000-15000000	organic acid:sodium symporter activity	ENSG00000131389|ENSG00000157103|ENSG00000132164|	4.07517e-61
5-chr3-10000000-15000000	neurotransmitter:sodium symporter activity	ENSG00000131389|ENSG00000157103|ENSG00000132164|	1.90517e-07
10-chr3-22500000-27500000	ligand-dependent nuclear receptor activity	ENSG00000151090|ENSG00000077092|ENSG00000174738|	0.0296647
18-chr3-42500000-47500000	cytokine binding	ENSG00000163823|ENSG00000160791|ENSG00000173585|ENSG00000121807|ENSG00000173578|ENSG00000144648|ENSG00000121797|ENSG00000183625|ENSG00000172215|	2.4342e-06
18-chr3-42500000-47500000	peptide receptor activity	ENSG00000163823|ENSG00000160791|ENSG00000173585|ENSG00000121807|ENSG00000173578|ENSG00000144648|ENSG00000121797|ENSG00000183625|ENSG00000172215|	0.000694577
19-chr3-45000000-50000000	cytokine binding	ENSG00000163823|ENSG00000160791|ENSG00000173585|ENSG00000121807|ENSG00000173578|ENSG00000121797|ENSG00000183625|ENSG00000172215|	2.24484e-09
19-chr3-45000000-50000000	peptide receptor activity	ENSG00000163823|ENSG00000160791|ENSG00000173585|ENSG00000121807|ENSG00000173578|ENSG00000121797|ENSG00000183625|ENSG00000172215|	9.32364e-12
39-chr3-95000000-100000000	transmembrane receptor activity	ENSG00000196098|ENSG00000187900|ENSG00000183185|ENSG00000154165|ENSG00000196578|ENSG00000197036|ENSG00000197621|ENSG00000181828|ENSG00000197938|ENSG00000188974|	0.0324547
40-chr3-97500000-102500000	transmembrane receptor activity	ENSG00000196098|ENSG00000187900|ENSG00000183185|ENSG00000154165|ENSG00000196578|ENSG00000144820|ENSG00000197036|ENSG00000197621|ENSG00000181828|ENSG00000197938|ENSG00000188974|	1.96532e-07
59-chr3-145000000-150000000	phospholipid transporter activity	ENSG00000188313|ENSG00000163746|ENSG00000114698|	0.0324547
18-chr4-42500000-47500000	neurotransmitter receptor activity	ENSG00000163285|ENSG00000163288|ENSG00000109158|ENSG00000151834|	1.81452e-12
18-chr4-42500000-47500000	ion channel activity	ENSG00000163285|ENSG00000163288|ENSG00000183783|ENSG00000109158|ENSG00000151834|	1.21797e-11
18-chr4-42500000-47500000	alpha-type channel activity	ENSG00000163285|ENSG00000163288|ENSG00000183783|ENSG00000109158|ENSG00000151834|	0.0479901
19-chr4-45000000-50000000	neurotransmitter receptor activity	ENSG00000163285|ENSG00000163288|ENSG00000109158|ENSG00000151834|	0.00076907
19-chr4-45000000-50000000	ion channel activity	ENSG00000163285|ENSG00000163288|ENSG00000198515|ENSG00000109158|ENSG00000151834|	0.00257559
27-chr4-65000000-70000000	transferase activity, transferring glycosyl groups	ENSG00000171234|ENSG00000135220|ENSG00000198277|ENSG00000197592|ENSG00000109181|ENSG00000197888|	0.0015056
28-chr4-67500000-72500000	extracellular matrix structural constituent conferring compression resistance	ENSG00000126549|ENSG00000178522|ENSG00000132464|	0.0101812
28-chr4-67500000-72500000	transferase activity, transferring glycosyl groups	ENSG00000171234|ENSG00000135226|ENSG00000135220|ENSG00000198277|ENSG00000197592|ENSG00000173610|ENSG00000109181|ENSG00000156096|ENSG00000197888|	0.0178974
29-chr4-70000000-75000000	G-protein-coupled receptor binding	ENSG00000163739|ENSG00000124875|ENSG00000109272|ENSG00000169429|	0.00142908
29-chr4-70000000-75000000	extracellular matrix structural constituent conferring compression resistance	ENSG00000126549|ENSG00000178522|ENSG00000132464|	0.00553735
30-chr4-72500000-77500000	G-protein-coupled receptor binding	ENSG00000138755|ENSG00000163739|ENSG00000163737|ENSG00000163736|ENSG00000163735|ENSG00000163734|ENSG00000124875|ENSG00000081041|ENSG00000169245|ENSG00000169248|ENSG00000109272|ENSG00000169429|	7.46401e-13
30-chr4-72500000-77500000	receptor binding	ENSG00000109321|ENSG00000124882|ENSG00000174808|ENSG00000138755|ENSG00000163739|ENSG00000163737|ENSG00000163736|ENSG00000163735|ENSG00000163734|ENSG00000124875|ENSG00000081041|ENSG00000169245|ENSG00000169248|ENSG00000109272|ENSG00000169429|	6.07651e-09
30-chr4-72500000-77500000	cytokine activity	ENSG00000109321|ENSG00000138755|ENSG00000163739|ENSG00000163737|ENSG00000163736|ENSG00000163735|ENSG00000163734|ENSG00000124875|ENSG00000081041|ENSG00000169245|ENSG00000169248|ENSG00000109272|ENSG00000169429|	2.34057e-10
31-chr4-75000000-80000000	G-protein-coupled receptor binding	ENSG00000156234|ENSG00000138755|ENSG00000163737|ENSG00000163736|ENSG00000163735|ENSG00000163734|ENSG00000081041|ENSG00000169245|ENSG00000169248|	2.42311e-08
31-chr4-75000000-80000000	receptor binding	ENSG00000156234|ENSG00000109321|ENSG00000124882|ENSG00000174808|ENSG00000138755|ENSG00000163737|ENSG00000163736|ENSG00000163735|ENSG00000163734|ENSG00000081041|ENSG00000169245|ENSG00000169248|	1.38556e-09
31-chr4-75000000-80000000	cytokine activity	ENSG00000156234|ENSG00000109321|ENSG00000138755|ENSG00000163737|ENSG00000163736|ENSG00000163735|ENSG00000163734|ENSG00000081041|ENSG00000169245|ENSG00000169248|	4.16485e-11
40-chr4-97500000-102500000	oxidoreductase activity, acting on CH-OH group of donors	ENSG00000197894|ENSG00000196616|ENSG00000196344|ENSG00000198099|ENSG00000172955|ENSG00000187758|	0.00142908
41-chr4-100000000-105000000	oxidoreductase activity, acting on CH-OH group of donors	ENSG00000197894|ENSG00000196616|ENSG00000196344|ENSG00000198099|ENSG00000172955|ENSG00000187758|	0.00142908
50-chr4-122500000-127500000	growth factor activity	ENSG00000170917|ENSG00000109471|ENSG00000138685|ENSG00000138684|	0.0289704
20-chr5-47500000-52500000	collagen binding	ENSG00000164171|ENSG00000152684|	0.0223657
52-chr5-127500000-132500000	cytokine activity	ENSG00000169194|ENSG00000164399|ENSG00000164404|ENSG00000164400|ENSG00000113520|ENSG00000113525|	0.0117663
53-chr5-130000000-135000000	cytokine activity	ENSG00000169194|ENSG00000164399|ENSG00000145824|ENSG00000164404|ENSG00000164400|ENSG00000113520|ENSG00000113525|	0.0453752
57-chr5-140000000-145000000	metal ion binding	ENSG00000113212|ENSG00000113211|ENSG00000197479|ENSG00000113580|ENSG00000187372|ENSG00000120328|ENSG00000171815|ENSG00000120322|ENSG00000120324|ENSG00000120327|ENSG00000113248|ENSG00000113555|ENSG00000120318|ENSG00000081853|ENSG00000196963|ENSG00000013561|ENSG00000081842|ENSG00000156453|ENSG00000113205|ENSG00000113209|ENSG00000081818|ENSG00000112852|ENSG00000146007|ENSG00000146001|	0.0101982
57-chr5-140000000-145000000	cation binding	ENSG00000113212|ENSG00000113211|ENSG00000197479|ENSG00000187372|ENSG00000120328|ENSG00000171815|ENSG00000120322|ENSG00000120324|ENSG00000120327|ENSG00000113248|ENSG00000113555|ENSG00000081853|ENSG00000196963|ENSG00000013561|ENSG00000081842|ENSG00000156453|ENSG00000113205|ENSG00000113209|ENSG00000081818|ENSG00000112852|ENSG00000146007|ENSG00000146001|	0.0131002
64-chr5-157500000-162500000	neurotransmitter receptor activity	ENSG00000145863|ENSG00000145864|ENSG00000113327|ENSG00000022355|	0.00150272
65-chr5-160000000-165000000	neurotransmitter receptor activity	ENSG00000145863|ENSG00000145864|ENSG00000113327|ENSG00000022355|	7.67883e-06
10-chr6-22500000-27500000	DNA binding	ENSG00000187837|ENSG00000196787|ENSG00000124693|ENSG00000187475|ENSG00000168274|ENSG00000197846|ENSG00000180573|ENSG00000137259|ENSG00000196532|ENSG00000188987|ENSG00000187990|ENSG00000124635|ENSG00000182952|ENSG00000196176|ENSG00000124532|ENSG00000197459|ENSG00000164508|ENSG00000197903|ENSG00000180596|ENSG00000198366|ENSG00000124642|ENSG00000196966|ENSG00000197061|ENSG00000168242|ENSG00000198518…	7.67883e-06
11-chr6-25000000-30000000	DNA binding	ENSG00000187837|ENSG00000196787|ENSG00000124693|ENSG00000187475|ENSG00000197279|ENSG00000197202|ENSG00000189298|ENSG00000168274|ENSG00000197153|ENSG00000197846|ENSG00000187626|ENSG00000180573|ENSG00000137259|ENSG00000196866|ENSG00000198558|ENSG00000196532|ENSG00000188987|ENSG00000187990|ENSG00000184348|ENSG00000196747|ENSG00000124635|ENSG00000182952|ENSG00000198315|ENSG00000196176|ENSG00000197459…	2.51884e-18
12-chr6-27500000-32500000	DNA binding	ENSG00000197279|ENSG00000197202|ENSG00000189298|ENSG00000137310|ENSG00000137313|ENSG00000197153|ENSG00000187626|ENSG00000196866|ENSG00000198558|ENSG00000066379|ENSG00000184348|ENSG00000196747|ENSG00000137411|ENSG00000198315|ENSG00000185130|ENSG00000196374|ENSG00000197062|ENSG00000137338|ENSG00000197914|ENSG00000197657|ENSG00000182572|ENSG00000158691|ENSG00000196501|ENSG00000182611|ENSG00000096654…	2.51884e-18
21-chr6-50000000-55000000	transferase activity, transferring alkyl or aryl (other than methyl) groups	ENSG00000187919|ENSG00000174156|ENSG00000170899|ENSG00000096087|ENSG00000182793|	3.87027e-06
22-chr6-52500000-57500000	transferase activity, transferring alkyl or aryl (other than methyl) groups	ENSG00000187919|ENSG00000174156|ENSG00000170899|ENSG00000096087|ENSG00000182793|	3.87027e-06
11-chr7-25000000-30000000	DNA binding	ENSG00000146592|ENSG00000005073|ENSG00000050344|ENSG00000106031|ENSG00000105991|ENSG00000105997|ENSG00000105996|ENSG00000106038|ENSG00000078399|ENSG00000197576|ENSG00000153807|ENSG00000106004|ENSG00000106006|ENSG00000122592|	0.0229129
39-chr7-95000000-100000000	heme binding	ENSG00000106258|ENSG00000160870|ENSG00000160868|ENSG00000187851|ENSG00000021461|	0.000265051
40-chr7-97500000-102500000	oxidoreductase activity, acting on paired donors, with incorporation or reduction of molecular oxygen	ENSG00000106258|ENSG00000160870|ENSG00000160868|ENSG00000187851|ENSG00000021461|ENSG00000106397|	0.00440764
9-chr8-20000000-25000000	TRAIL binding	ENSG00000120889|ENSG00000104689|	0.0296647
10-chr8-22500000-27500000	TRAIL binding	ENSG00000120889|ENSG00000104689|	0.00215163
34-chr8-82500000-87500000	carbon-oxygen lyase activity	ENSG00000185015|ENSG00000164879|ENSG00000104267|ENSG00000133742|	0.00353898
35-chr8-85000000-90000000	carbon-oxygen lyase activity	ENSG00000185015|ENSG00000164879|ENSG00000104267|ENSG00000133742|	0.00412842
2-chr9-2500000-7500000	hormone activity	ENSG00000120211|ENSG00000120210|ENSG00000107014|ENSG00000107018|	6.47471e-06
3-chr9-5000000-10000000	hormone activity	ENSG00000120211|ENSG00000120210|ENSG00000107014|ENSG00000107018|	1.24291e-06
8-chr9-17500000-22500000	receptor binding	ENSG00000171855|ENSG00000120235|ENSG00000188379|ENSG00000147885|ENSG00000186809|ENSG00000120247|ENSG00000186803|ENSG00000120242|ENSG00000147877|ENSG00000177047|ENSG00000147873|ENSG00000184995|ENSG00000137026|ENSG00000137080|	0.0171265
8-chr9-17500000-22500000	cytokine activity	ENSG00000171855|ENSG00000120235|ENSG00000188379|ENSG00000147885|ENSG00000186809|ENSG00000120247|ENSG00000186803|ENSG00000120242|ENSG00000147877|ENSG00000177047|ENSG00000147873|ENSG00000184995|ENSG00000137026|ENSG00000137080|	0.00027266
9-chr9-20000000-25000000	receptor binding	ENSG00000171855|ENSG00000120235|ENSG00000188379|ENSG00000147885|ENSG00000186809|ENSG00000120247|ENSG00000186803|ENSG00000120242|ENSG00000147877|ENSG00000177047|ENSG00000147873|ENSG00000184995|ENSG00000137026|ENSG00000137080|	0.0147338
9-chr9-20000000-25000000	cytokine activity	ENSG00000171855|ENSG00000120235|ENSG00000188379|ENSG00000147885|ENSG00000186809|ENSG00000120247|ENSG00000186803|ENSG00000120242|ENSG00000147877|ENSG00000177047|ENSG00000147873|ENSG00000184995|ENSG00000137026|ENSG00000137080|	6.57115e-09
49-chr9-120000000-125000000	transmembrane receptor activity	ENSG00000136832|ENSG00000136834|ENSG00000171459|ENSG00000136939|ENSG00000171496|ENSG00000171481|ENSG00000171505|ENSG00000165202|ENSG00000165204|ENSG00000171501|ENSG00000188394|ENSG00000148215|ENSG00000197233|ENSG00000173679|ENSG00000171484|	0.0279394
50-chr9-122500000-127500000	transmembrane receptor activity	ENSG00000136832|ENSG00000136834|ENSG00000171459|ENSG00000136939|ENSG00000171496|ENSG00000180264|ENSG00000171481|ENSG00000171505|ENSG00000165202|ENSG00000165204|ENSG00000171501|ENSG00000188394|ENSG00000148215|ENSG00000185585|ENSG00000197233|ENSG00000173679|ENSG00000171484|	1.46449e-05
56-chr9-137500000-142500000	intramolecular oxidoreductase activity	ENSG00000187922|ENSG00000107317|ENSG00000177984|ENSG00000184925|	4.50923e-06
2-chr10-2500000-7500000	oxidoreductase activity, acting on CH-OH group of donors	ENSG00000151632|ENSG00000151631|ENSG00000196139|ENSG00000187134|ENSG00000198610|	0.000387139
32-chr10-77500000-82500000	sugar binding	ENSG00000122854|ENSG00000122852|ENSG00000185303|ENSG00000182314|ENSG00000133661|	0.000324896
33-chr10-80000000-85000000	sugar binding	ENSG00000122854|ENSG00000122852|ENSG00000185303|ENSG00000182314|ENSG00000133661|	5.58331e-07
38-chr10-92500000-97500000	heme binding	ENSG00000165841|ENSG00000138109|ENSG00000108242|ENSG00000095596|ENSG00000187553|ENSG00000138115|ENSG00000165338|	0.0136655
38-chr10-92500000-97500000	monooxygenase activity	ENSG00000165841|ENSG00000138109|ENSG00000108242|ENSG00000095596|ENSG00000187553|ENSG00000138115|	5.72185e-06
38-chr10-92500000-97500000	oxidoreductase activity, acting on paired donors, with incorporation or reduction of molecular oxygen	ENSG00000165841|ENSG00000138109|ENSG00000108242|ENSG00000095596|ENSG00000138115|	0.00439358
1-chr11-0-5000000	transmembrane receptor activity	ENSG00000176893|ENSG00000176895|ENSG00000069696|ENSG00000175609|ENSG00000176879|ENSG00000176900|ENSG00000176904|ENSG00000176937|ENSG00000188069|ENSG00000185187|ENSG00000197790|ENSG00000182170|ENSG00000176951|ENSG00000197428|ENSG00000197674|ENSG00000184350|ENSG00000167332|ENSG00000176798|ENSG00000171999|ENSG00000180785|ENSG00000181963|ENSG00000176925|ENSG00000196778|ENSG00000176922|	4.15815e-07
2-chr11-2500000-7500000	transmembrane receptor activity	ENSG00000184698|ENSG00000184881|ENSG00000176893|ENSG00000176895|ENSG00000167355|ENSG00000170782|ENSG00000167359|ENSG00000175609|ENSG00000180923|ENSG00000181009|ENSG00000183251|ENSG00000176787|ENSG00000176879|ENSG00000181074|ENSG00000181001|ENSG00000181609|ENSG00000187918|ENSG00000176900|ENSG00000180909|ENSG00000176904|ENSG00000176937|ENSG00000188069|ENSG00000180913|ENSG00000180919|ENSG00000197790…	0.000311714
3-chr11-5000000-10000000	transmembrane receptor activity	ENSG00000184698|ENSG00000184881|ENSG00000167355|ENSG00000170782|ENSG00000167359|ENSG00000180923|ENSG00000181009|ENSG00000183251|ENSG00000176787|ENSG00000181074|ENSG00000181001|ENSG00000170683|ENSG00000181609|ENSG00000187918|ENSG00000180909|ENSG00000170688|ENSG00000182334|ENSG00000180913|ENSG00000180919|ENSG00000183313|ENSG00000181616|ENSG00000176748|ENSG00000167360|ENSG00000176239|ENSG00000184933…	2.23376e-07
20-chr11-47500000-52500000	transmembrane receptor activity	ENSG00000186483|ENSG00000149177|ENSG00000185926|ENSG00000176555|ENSG00000178306|ENSG00000176540|ENSG00000176547|ENSG00000175619|ENSG00000109920|ENSG00000176567|ENSG00000172208|ENSG00000176537|	1.73212e-22
21-chr11-50000000-55000000	transmembrane receptor activity	ENSG00000186483|ENSG00000181950|ENSG00000181958|ENSG00000185926|ENSG00000181961|ENSG00000176537|	6.44611e-22
22-chr11-52500000-57500000	transmembrane receptor activity	ENSG00000149133|ENSG00000172459|ENSG00000172457|ENSG00000181903|ENSG00000172199|ENSG00000172489|ENSG00000172487|ENSG00000166693|ENSG00000181689|ENSG00000172188|ENSG00000181950|ENSG00000184741|ENSG00000181837|ENSG00000181958|ENSG00000174937|ENSG00000181296|ENSG00000186124|ENSG00000185701|ENSG00000181723|ENSG00000167822|ENSG00000150269|ENSG00000181927|ENSG00000167825|ENSG00000186886|ENSG00000174914…	4.16485e-11
23-chr11-55000000-60000000	transmembrane receptor activity	ENSG00000172774|ENSG00000172772|ENSG00000149133|ENSG00000172459|ENSG00000172457|ENSG00000186509|ENSG00000172289|ENSG00000172381|ENSG00000176200|ENSG00000176205|ENSG00000181903|ENSG00000172199|ENSG00000172489|ENSG00000172487|ENSG00000166884|ENSG00000198283|ENSG00000166693|ENSG00000181689|ENSG00000172188|ENSG00000184741|ENSG00000180475|ENSG00000181837|ENSG00000174937|ENSG00000181296|ENSG00000172365…	1.30257e-10
24-chr11-57500000-62500000	transmembrane receptor activity	ENSG00000172774|ENSG00000172772|ENSG00000186509|ENSG00000172289|ENSG00000172381|ENSG00000176200|ENSG00000176205|ENSG00000110448|ENSG00000166884|ENSG00000198283|ENSG00000168539|ENSG00000180475|ENSG00000183134|ENSG00000172365|ENSG00000172362|ENSG00000172320|ENSG00000172769|ENSG00000172324|ENSG00000013725|ENSG00000172742|ENSG00000186513|ENSG00000176495|ENSG00000198261|ENSG00000196779|ENSG00000197887…	1.15207e-09
28-chr11-67500000-72500000	folic acid binding	ENSG00000110195|ENSG00000110203|ENSG00000165457|	3.88541e-09
29-chr11-70000000-75000000	folic acid binding	ENSG00000110195|ENSG00000110203|ENSG00000165457|	0.00025271
40-chr11-97500000-102500000	metal ion binding	ENSG00000137745|ENSG00000110330|ENSG00000137673|ENSG00000137672|ENSG00000137674|ENSG00000118113|ENSG00000149968|ENSG00000196611|ENSG00000082175|ENSG00000166670|ENSG00000110347|ENSG00000023445|	0.00772705
40-chr11-97500000-102500000	peptidase activity	ENSG00000137745|ENSG00000137673|ENSG00000137675|ENSG00000137674|ENSG00000118113|ENSG00000149968|ENSG00000196611|ENSG00000166670|ENSG00000110347|	0.000621207
40-chr11-97500000-102500000	cation binding	ENSG00000137745|ENSG00000110330|ENSG00000137673|ENSG00000137672|ENSG00000137674|ENSG00000118113|ENSG00000149968|ENSG00000196611|ENSG00000166670|ENSG00000110347|ENSG00000023445|	0.0250757
41-chr11-100000000-105000000	peptidase activity	ENSG00000137745|ENSG00000137673|ENSG00000118168|ENSG00000137675|ENSG00000137674|ENSG00000118113|ENSG00000149968|ENSG00000196611|ENSG00000166670|ENSG00000110347|ENSG00000196954|ENSG00000137757|ENSG00000137752|ENSG00000170967|	0.0443887
49-chr11-120000000-125000000	transmembrane receptor activity	ENSG00000181457|ENSG00000197309|ENSG00000196099|ENSG00000181518|ENSG00000197849|ENSG00000181499|ENSG00000198674|ENSG00000196661|ENSG00000173365|ENSG00000196403|ENSG00000196248|ENSG00000196703|ENSG00000149403|ENSG00000181214|ENSG00000171014|ENSG00000182634|ENSG00000137642|ENSG00000186268|ENSG00000198657|ENSG00000197263|ENSG00000196119|ENSG00000197125|ENSG00000170953|ENSG00000196341|	0.00118123
50-chr11-122500000-127500000	transmembrane receptor activity	ENSG00000181457|ENSG00000197309|ENSG00000196099|ENSG00000181518|ENSG00000197849|ENSG00000181499|ENSG00000198674|ENSG00000150455|ENSG00000196661|ENSG00000173365|ENSG00000196403|ENSG00000196248|ENSG00000196703|ENSG00000181214|ENSG00000171014|ENSG00000182634|ENSG00000186268|ENSG00000198657|ENSG00000197263|ENSG00000196119|ENSG00000197125|ENSG00000170953|ENSG00000196341|	0.000432001
3-chr12-5000000-10000000	sugar binding	ENSG00000150045|ENSG00000198178|ENSG00000069493|ENSG00000111796|ENSG00000003056|ENSG00000110852|ENSG00000188393|ENSG00000166523|ENSG00000166527|ENSG00000139187|ENSG00000111729|ENSG00000110848|	0.00875582
4-chr12-7500000-12500000	transmembrane receptor activity	ENSG00000173342|ENSG00000021602|ENSG00000150045|ENSG00000134539|ENSG00000121377|ENSG00000177575|ENSG00000197870|ENSG00000171860|ENSG00000069493|ENSG00000111796|ENSG00000003056|ENSG00000134551|ENSG00000186136|ENSG00000134545|ENSG00000121318|ENSG00000196229|ENSG00000121314|ENSG00000121381|ENSG00000111729|ENSG00000110848|ENSG00000165682|	2.06382e-06
4-chr12-7500000-12500000	sugar binding	ENSG00000197992|ENSG00000172243|ENSG00000021602|ENSG00000150045|ENSG00000134539|ENSG00000150048|ENSG00000188402|ENSG00000198178|ENSG00000183542|ENSG00000069493|ENSG00000173391|ENSG00000111796|ENSG00000003056|ENSG00000110852|ENSG00000134545|ENSG00000188393|ENSG00000172322|ENSG00000166523|ENSG00000166527|ENSG00000139187|ENSG00000111729|ENSG00000110848|ENSG00000165682|	0.0162292
5-chr12-10000000-15000000	transmembrane receptor activity	ENSG00000173342|ENSG00000021602|ENSG00000134539|ENSG00000121377|ENSG00000111291|ENSG00000150086|ENSG00000197870|ENSG00000183150|ENSG00000134551|ENSG00000186136|ENSG00000134545|ENSG00000121318|ENSG00000196229|ENSG00000121314|ENSG00000121381|ENSG00000183935|ENSG00000013588|ENSG00000165682|	0.00184161
5-chr12-10000000-15000000	sugar binding	ENSG00000197992|ENSG00000172243|ENSG00000021602|ENSG00000134539|ENSG00000150048|ENSG00000188402|ENSG00000183542|ENSG00000173391|ENSG00000134545|ENSG00000172322|ENSG00000165682|	0.0226374
19-chr12-45000000-50000000	water channel activity	ENSG00000167580|ENSG00000086159|ENSG00000161798|	1.62164e-07
20-chr12-47500000-52500000	water channel activity	ENSG00000167580|ENSG00000086159|ENSG00000161798|	0.0387763
7-chr14-15000000-20000000	transmembrane receptor activity	ENSG00000169484|ENSG00000169488|ENSG00000176299|ENSG00000176294|ENSG00000182652|ENSG00000176230|ENSG00000176246|ENSG00000155249|ENSG00000176198|ENSG00000196832|ENSG00000186445|ENSG00000176281|ENSG00000196143|ENSG00000165762|ENSG00000176312|ENSG00000184394|ENSG00000176213|ENSG00000176219|ENSG00000176253|	0.0284875
8-chr14-17500000-22500000	peptide antigen binding	ENSG00000129563|ENSG00000092217|ENSG00000166056|	0.0452203
8-chr14-17500000-22500000	transmembrane receptor activity	ENSG00000181803|ENSG00000169484|ENSG00000169488|ENSG00000176299|ENSG00000176294|ENSG00000182652|ENSG00000176230|ENSG00000176246|ENSG00000155249|ENSG00000176198|ENSG00000169208|ENSG00000196832|ENSG00000186445|ENSG00000169202|ENSG00000176281|ENSG00000196143|ENSG00000165762|ENSG00000176312|ENSG00000172611|ENSG00000184394|ENSG00000176213|ENSG00000176219|ENSG00000165804|ENSG00000169327|ENSG00000176253|	0.0023381
8-chr14-17500000-22500000	hydrolase activity, acting on ester bonds	ENSG00000169385|ENSG00000169413|ENSG00000100823|ENSG00000136315|ENSG00000173464|ENSG00000129538|ENSG00000173431|ENSG00000188655|ENSG00000182545|ENSG00000181552|ENSG00000169397|ENSG00000181784|ENSG00000181562|ENSG00000165799|	0.0317642
9-chr14-20000000-25000000	peptide antigen binding	ENSG00000129563|ENSG00000092217|ENSG00000166056|	0.0112618
37-chr14-90000000-95000000	protease inhibitor activity	ENSG00000165951|ENSG00000165953|ENSG00000170099|ENSG00000187483|ENSG00000197249|ENSG00000100665|ENSG00000170054|ENSG00000186910|ENSG00000196136|ENSG00000140093|ENSG00000188488|	0.0128437
38-chr14-92500000-97500000	protease inhibitor activity	ENSG00000165951|ENSG00000165953|ENSG00000170099|ENSG00000187483|ENSG00000197249|ENSG00000100665|ENSG00000170054|ENSG00000186910|ENSG00000196136|ENSG00000140093|ENSG00000188488|	6.74082e-05
10-chr15-22500000-27500000	neurotransmitter receptor activity	ENSG00000186297|ENSG00000182256|ENSG00000166206|	0.00117167
31-chr15-75000000-80000000	acetylcholine binding	ENSG00000169684|ENSG00000080644|ENSG00000117971|	0.0401384
3-chr17-5000000-10000000	oxidoreductase activity, acting on single donors with incorporation of molecular oxygen	ENSG00000108839|ENSG00000179593|ENSG00000179477|ENSG00000179148|	1.66667e-05
3-chr17-5000000-10000000	dioxygenase activity	ENSG00000108839|ENSG00000179593|ENSG00000179477|ENSG00000179148|	0.000114008
4-chr17-7500000-12500000	calmodulin binding	ENSG00000006788|ENSG00000125414|ENSG00000109063|ENSG00000109061|ENSG00000133026|ENSG00000133020|ENSG00000141048|	1.09377e-05
4-chr17-7500000-12500000	cytoskeletal protein binding	ENSG00000006788|ENSG00000125414|ENSG00000109063|ENSG00000109061|ENSG00000133026|ENSG00000133020|ENSG00000141048|	0.00175122
5-chr17-10000000-15000000	calmodulin binding	ENSG00000006788|ENSG00000125414|ENSG00000109063|ENSG00000109061|ENSG00000133020|ENSG00000141048|	0.000323504
5-chr17-10000000-15000000	cytoskeletal protein binding	ENSG00000006788|ENSG00000125414|ENSG00000109063|ENSG00000109061|ENSG00000133020|ENSG00000141048|	5.01925e-06
11-chr17-25000000-30000000	G-protein-coupled receptor binding	ENSG00000108688|ENSG00000108700|ENSG00000108702|ENSG00000108691|ENSG00000181374|ENSG00000172156|	3.84278e-06
11-chr17-25000000-30000000	cytokine activity	ENSG00000108688|ENSG00000108700|ENSG00000108702|ENSG00000108691|ENSG00000181374|ENSG00000172156|	0.00403016
12-chr17-27500000-32500000	G-protein-coupled receptor binding	ENSG00000108688|ENSG00000167236|ENSG00000161573|ENSG00000161570|ENSG00000161574|ENSG00000108700|ENSG00000108702|ENSG00000129277|ENSG00000108691|ENSG00000006074|ENSG00000006075|ENSG00000181374|ENSG00000172156|	0.0057588
12-chr17-27500000-32500000	receptor binding	ENSG00000108688|ENSG00000108278|ENSG00000167236|ENSG00000161573|ENSG00000161570|ENSG00000161574|ENSG00000108700|ENSG00000108702|ENSG00000129277|ENSG00000108691|ENSG00000006074|ENSG00000006075|ENSG00000181374|ENSG00000172156|	0.00430448
12-chr17-27500000-32500000	cytokine activity	ENSG00000108688|ENSG00000167236|ENSG00000161573|ENSG00000161570|ENSG00000161574|ENSG00000108700|ENSG00000108702|ENSG00000129277|ENSG00000108691|ENSG00000006074|ENSG00000006075|ENSG00000181374|ENSG00000172156|	4.19387e-12
13-chr17-30000000-35000000	G-protein-coupled receptor binding	ENSG00000167236|ENSG00000161573|ENSG00000161570|ENSG00000161574|ENSG00000129277|ENSG00000006074|ENSG00000006075|	1.66667e-05
13-chr17-30000000-35000000	cytokine activity	ENSG00000167236|ENSG00000161573|ENSG00000161570|ENSG00000161574|ENSG00000129277|ENSG00000006074|ENSG00000006075|	0.000138985
16-chr18-37500000-42500000	urea transporter activity	ENSG00000132874|ENSG00000141469|	9.84946e-05
17-chr18-40000000-45000000	urea transporter activity	ENSG00000132874|ENSG00000141469|	0.000198901
19-chr18-45000000-50000000	methyl-CpG binding	ENSG00000141644|ENSG00000134046|	0.0416589
23-chr18-55000000-60000000	protease inhibitor activity	ENSG00000197641|ENSG00000197632|ENSG00000166634|ENSG00000166401|ENSG00000166404|ENSG00000057149|ENSG00000166396|	1.59826e-16
24-chr18-57500000-62500000	protease inhibitor activity	ENSG00000197641|ENSG00000197632|ENSG00000166634|ENSG00000166401|ENSG00000166404|ENSG00000057149|ENSG00000166396|	1.02217e-60
4-chr19-7500000-12500000	cation binding	ENSG00000130803|ENSG00000130164|ENSG00000102575|ENSG00000196646|ENSG00000197647|ENSG00000196484|ENSG00000196757|ENSG00000198028|ENSG00000198342|ENSG00000142303|ENSG00000198551|ENSG00000177599|ENSG00000197332|ENSG00000171469|ENSG00000171466|ENSG00000167807|ENSG00000090659|ENSG00000196826|ENSG00000130175|ENSG00000133250|ENSG00000099785|ENSG00000142449|ENSG00000188629|ENSG00000197961|ENSG00000188321…	0.00797219
9-chr19-20000000-25000000	metal ion binding	ENSG00000197020|ENSG00000167232|ENSG00000198521|ENSG00000104777|ENSG00000196268|ENSG00000196172|ENSG00000196350|ENSG00000197360|ENSG00000183850|ENSG00000105750|ENSG00000197372|ENSG00000196705|ENSG00000160229|ENSG00000196686|ENSG00000118620|ENSG00000197134|ENSG00000160352|	1.88443e-22
9-chr19-20000000-25000000	DNA binding	ENSG00000197020|ENSG00000167232|ENSG00000198521|ENSG00000104777|ENSG00000196350|ENSG00000183850|ENSG00000105750|ENSG00000197372|ENSG00000196705|ENSG00000160229|ENSG00000196686|ENSG00000118620|ENSG00000197134|	3.69577e-86
9-chr19-20000000-25000000	cation binding	ENSG00000197020|ENSG00000167232|ENSG00000198521|ENSG00000104777|ENSG00000196268|ENSG00000196172|ENSG00000196350|ENSG00000197360|ENSG00000183850|ENSG00000105750|ENSG00000197372|ENSG00000196705|ENSG00000160229|ENSG00000196686|ENSG00000118620|ENSG00000197134|ENSG00000160352|	6.4461e-06
16-chr19-37500000-42500000	metal ion binding	ENSG00000161298|ENSG00000089335|ENSG00000161277|ENSG00000142065|ENSG00000181007|ENSG00000105261|ENSG00000186017|ENSG00000142279|ENSG00000196357|ENSG00000189042|ENSG00000105258|ENSG00000197800|ENSG00000196761|ENSG00000197808|ENSG00000188283|ENSG00000161265|ENSG00000180884|ENSG00000185869|ENSG00000196967|ENSG00000105663|ENSG00000168813|ENSG00000168661|ENSG00000105675|ENSG00000167637|ENSG00000167635…	7.83575e-16
16-chr19-37500000-42500000	cation binding	ENSG00000161298|ENSG00000089335|ENSG00000142065|ENSG00000181007|ENSG00000105261|ENSG00000186017|ENSG00000142279|ENSG00000196357|ENSG00000189042|ENSG00000105258|ENSG00000197800|ENSG00000196761|ENSG00000197808|ENSG00000188283|ENSG00000180884|ENSG00000185869|ENSG00000196967|ENSG00000105663|ENSG00000168813|ENSG00000168661|ENSG00000105675|ENSG00000167637|ENSG00000167635|ENSG00000186020|ENSG00000105290…	0.015187
17-chr19-40000000-45000000	metal ion binding	ENSG00000161298|ENSG00000128016|ENSG00000161277|ENSG00000142065|ENSG00000181007|ENSG00000105261|ENSG00000171777|ENSG00000186017|ENSG00000196218|ENSG00000196437|ENSG00000011332|ENSG00000198182|ENSG00000171817|ENSG00000181666|ENSG00000189144|ENSG00000180479|ENSG00000196357|ENSG00000189042|ENSG00000105258|ENSG00000197800|ENSG00000196761|ENSG00000197808|ENSG00000120784|ENSG00000188283|ENSG00000171827…	2.23181e-07
17-chr19-40000000-45000000	cation binding	ENSG00000161298|ENSG00000142065|ENSG00000181007|ENSG00000105261|ENSG00000171777|ENSG00000186017|ENSG00000196218|ENSG00000196437|ENSG00000011332|ENSG00000198182|ENSG00000171817|ENSG00000181666|ENSG00000189144|ENSG00000180479|ENSG00000196357|ENSG00000189042|ENSG00000105258|ENSG00000197800|ENSG00000196761|ENSG00000197808|ENSG00000120784|ENSG00000188283|ENSG00000171827|ENSG00000180884|ENSG00000185869…	2.82481e-07
18-chr19-42500000-47500000	heme binding	ENSG00000167600|ENSG00000130612|ENSG00000197408|ENSG00000197446|ENSG00000198077|ENSG00000197573|ENSG00000197838|ENSG00000198461|	0.0343709
18-chr19-42500000-47500000	monooxygenase activity	ENSG00000167600|ENSG00000130612|ENSG00000197408|ENSG00000197446|ENSG00000198077|ENSG00000197573|ENSG00000197838|ENSG00000198461|	8.41008e-09
18-chr19-42500000-47500000	oxidoreductase activity, acting on paired donors, with incorporation or reduction of molecular oxygen	ENSG00000167600|ENSG00000197408|ENSG00000197446|ENSG00000198077|ENSG00000197573|ENSG00000197838|ENSG00000171570|	2.4353e-12
19-chr19-45000000-50000000	heme binding	ENSG00000167600|ENSG00000130612|ENSG00000197408|ENSG00000197446|ENSG00000198077|ENSG00000197573|ENSG00000197838|ENSG00000198461|	1.57321e-06
19-chr19-45000000-50000000	monooxygenase activity	ENSG00000167600|ENSG00000130612|ENSG00000197408|ENSG00000197446|ENSG00000198077|ENSG00000197573|ENSG00000197838|ENSG00000198461|	0.0363508
19-chr19-45000000-50000000	metal ion binding	ENSG00000178386|ENSG00000105409|ENSG00000176472|ENSG00000018607|ENSG00000062370|ENSG00000090006|ENSG00000167600|ENSG00000187187|ENSG00000142046|ENSG00000184280|ENSG00000105429|ENSG00000186019|ENSG00000130612|ENSG00000197782|ENSG00000197408|ENSG00000142273|ENSG00000176232|ENSG00000105732|ENSG00000131115|ENSG00000131116|ENSG00000124459|ENSG00000105755|ENSG00000167383|ENSG00000167380|ENSG00000167384…	0.0366101
19-chr19-45000000-50000000	oxidoreductase activity, acting on paired donors, with incorporation or reduction of molecular oxygen	ENSG00000167600|ENSG00000197408|ENSG00000197446|ENSG00000198077|ENSG00000197573|ENSG00000197838|ENSG00000171570|	1.50128e-09
19-chr19-45000000-50000000	cation binding	ENSG00000178386|ENSG00000105409|ENSG00000176472|ENSG00000018607|ENSG00000062370|ENSG00000090006|ENSG00000167600|ENSG00000187187|ENSG00000142046|ENSG00000184280|ENSG00000105429|ENSG00000186019|ENSG00000130612|ENSG00000197782|ENSG00000197408|ENSG00000142273|ENSG00000176232|ENSG00000105732|ENSG00000131115|ENSG00000131116|ENSG00000124459|ENSG00000167383|ENSG00000167380|ENSG00000167384|ENSG00000167625…	5.44708e-14
20-chr19-47500000-52500000	DNA binding	ENSG00000178386|ENSG00000018607|ENSG00000062370|ENSG00000104856|ENSG00000184280|ENSG00000170684|ENSG00000186019|ENSG00000130751|ENSG00000176232|ENSG00000131115|ENSG00000131116|ENSG00000124459|ENSG00000073050|ENSG00000167383|ENSG00000167380|ENSG00000167384|ENSG00000177045|ENSG00000124440|ENSG00000176182|ENSG00000170608|ENSG00000160007|ENSG00000159905|ENSG00000159904|ENSG00000159885|ENSG00000159882…	0.00616757
22-chr19-52500000-57500000	sugar binding	ENSG00000129450|ENSG00000105501|ENSG00000105366|ENSG00000105383|ENSG00000105472|ENSG00000161640|ENSG00000105492|ENSG00000142512|ENSG00000168995|ENSG00000160296|	2.03158e-06
23-chr19-55000000-60000000	peptidase activity	ENSG00000129451|ENSG00000174562|ENSG00000129455|ENSG00000142515|ENSG00000167748|ENSG00000167749|ENSG00000129437|ENSG00000169035|ENSG00000131400|ENSG00000131401|ENSG00000186474|ENSG00000167759|ENSG00000167755|ENSG00000167754|ENSG00000167757|ENSG00000167751|	0.00403016
23-chr19-55000000-60000000	sugar binding	ENSG00000129450|ENSG00000105501|ENSG00000105366|ENSG00000105383|ENSG00000105472|ENSG00000161640|ENSG00000105492|ENSG00000142512|ENSG00000168995|ENSG00000160296|	3.48597e-06
24-chr19-57500000-62500000	metal ion binding	ENSG00000198046|ENSG00000130433|ENSG00000171425|ENSG00000196417|ENSG00000018869|ENSG00000197025|ENSG00000197951|ENSG00000142408|ENSG00000142409|ENSG00000196867|ENSG00000142396|ENSG00000196263|ENSG00000130844|ENSG00000197497|ENSG00000198440|ENSG00000167562|ENSG00000170949|ENSG00000105605|ENSG00000167766|ENSG00000179922|ENSG00000182986|ENSG00000175885|ENSG00000131848|ENSG00000126583|ENSG00000160336…	0.0388315
24-chr19-57500000-62500000	cation binding	ENSG00000198046|ENSG00000130433|ENSG00000171425|ENSG00000196417|ENSG00000018869|ENSG00000197025|ENSG00000197951|ENSG00000142408|ENSG00000142409|ENSG00000196867|ENSG00000142396|ENSG00000196263|ENSG00000130844|ENSG00000197497|ENSG00000198440|ENSG00000167562|ENSG00000170949|ENSG00000105605|ENSG00000167766|ENSG00000179922|ENSG00000182986|ENSG00000175885|ENSG00000131848|ENSG00000126583|ENSG00000160336…	5.57411e-06
25-chr19-60000000-65000000	metal ion binding	ENSG00000198046|ENSG00000152475|ENSG00000186272|ENSG00000119574|ENSG00000171425|ENSG00000083828|ENSG00000181894|ENSG00000018869|ENSG00000173480|ENSG00000197025|ENSG00000171606|ENSG00000197951|ENSG00000176293|ENSG00000121406|ENSG00000142409|ENSG00000196867|ENSG00000196263|ENSG00000121417|ENSG00000130726|ENSG00000121413|ENSG00000198440|ENSG00000178935|ENSG00000186230|ENSG00000180532|ENSG00000166704…	0.000233515
25-chr19-60000000-65000000	cation binding	ENSG00000198046|ENSG00000152475|ENSG00000186272|ENSG00000119574|ENSG00000171425|ENSG00000083828|ENSG00000181894|ENSG00000018869|ENSG00000173480|ENSG00000197025|ENSG00000171606|ENSG00000197951|ENSG00000176293|ENSG00000121406|ENSG00000142409|ENSG00000196867|ENSG00000196263|ENSG00000121417|ENSG00000130726|ENSG00000121413|ENSG00000198440|ENSG00000178935|ENSG00000186230|ENSG00000180532|ENSG00000166704…	0.0416589
26-chr19-62500000-67500000	metal ion binding	ENSG00000152475|ENSG00000186272|ENSG00000119574|ENSG00000083828|ENSG00000181894|ENSG00000173480|ENSG00000171606|ENSG00000176293|ENSG00000121406|ENSG00000121417|ENSG00000130726|ENSG00000121413|ENSG00000178935|ENSG00000186230|ENSG00000180532|ENSG00000166704|ENSG00000152454|ENSG00000152467|ENSG00000099326|ENSG00000131845|ENSG00000131849|ENSG00000105132|ENSG00000198131|ENSG00000105136|ENSG00000083842…	3.18803e-06
26-chr19-62500000-67500000	DNA binding	ENSG00000119574|ENSG00000171606|ENSG00000176293|ENSG00000121417|ENSG00000130726|ENSG00000121413|ENSG00000180532|ENSG00000166704|ENSG00000152454|ENSG00000152467|ENSG00000099326|ENSG00000131845|ENSG00000131849|ENSG00000083842|ENSG00000083838|ENSG00000196724|ENSG00000184294|ENSG00000179909|ENSG00000171574|ENSG00000083812|ENSG00000182318|ENSG00000152443|	0.00692279
26-chr19-62500000-67500000	cation binding	ENSG00000152475|ENSG00000186272|ENSG00000119574|ENSG00000083828|ENSG00000181894|ENSG00000173480|ENSG00000171606|ENSG00000176293|ENSG00000121406|ENSG00000121417|ENSG00000130726|ENSG00000121413|ENSG00000178935|ENSG00000186230|ENSG00000180532|ENSG00000166704|ENSG00000152454|ENSG00000152467|ENSG00000099326|ENSG00000131845|ENSG00000131849|ENSG00000105132|ENSG00000198131|ENSG00000105136|ENSG00000083842…	0.00166915
9-chr20-20000000-25000000	protease inhibitor activity	ENSG00000173335|ENSG00000101439|ENSG00000101441|ENSG00000101435|ENSG00000125823|ENSG00000125815|ENSG00000077984|ENSG00000170373|ENSG00000170369|ENSG00000170367|ENSG00000125831|	0.0100403
10-chr20-22500000-27500000	protease inhibitor activity	ENSG00000173335|ENSG00000101439|ENSG00000101441|ENSG00000101435|ENSG00000125823|ENSG00000125815|ENSG00000077984|ENSG00000170373|ENSG00000170369|ENSG00000170367|ENSG00000125831|	0.0366101
17-chr20-40000000-45000000	protease inhibitor activity	ENSG00000175121|ENSG00000168703|ENSG00000124116|ENSG00000101448|ENSG00000101443|ENSG00000149651|ENSG00000149653|ENSG00000158901|ENSG00000124107|ENSG00000124102|ENSG00000168630|ENSG00000180305|	0.0112618
18-chr20-42500000-47500000	protease inhibitor activity	ENSG00000175121|ENSG00000168703|ENSG00000124116|ENSG00000101448|ENSG00000101443|ENSG00000149651|ENSG00000149653|ENSG00000158901|ENSG00000124107|ENSG00000124102|ENSG00000168630|ENSG00000180305|	3.81774e-06
13-chr21-30000000-35000000	cytokine binding	ENSG00000159113|ENSG00000159110|ENSG00000159128|ENSG00000142166|	3.18803e-06
11-chr22-25000000-30000000	protein carrier activity	ENSG00000100003|ENSG00000133488|ENSG00000100012|	5.06363e-06
41-chrX-100000000-105000000	translation factor activity, nucleic acid binding	ENSG00000180964|ENSG00000182916|ENSG00000133142|ENSG00000196507|ENSG00000172465|ENSG00000184905|	0.00616757
61-chrX-150000000-155000000	photoreceptor activity	ENSG00000166160|ENSG00000147380|ENSG00000102076|	0.00836052
62-chrX-152500000-157500000	photoreceptor activity	ENSG00000166160|ENSG00000147380|ENSG00000102076|	3.11881e-16
9-chrY-20000000-25000000	RNA binding	ENSG00000197026|ENSG00000157828|ENSG00000198692|ENSG00000131003|ENSG00000169785|ENSG00000174622|ENSG00000169800|	1.34089e-12
10-chrY-22500000-27500000	RNA binding	ENSG00000197026|ENSG00000196457|ENSG00000131003|ENSG00000187191|ENSG00000169785|ENSG00000169800|	0.0143573
18-chr1-42500000-47500000	tetrapyrrole binding	ENSG00000154198|ENSG00000142973|ENSG00000186377|ENSG00000187048|ENSG00000162365|ENSG00000186160|	3.84244e-07
19-chr1-45000000-50000000	oxidoreductase activity	ENSG00000154198|ENSG00000117450|ENSG00000117448|ENSG00000142973|ENSG00000186377|ENSG00000187048|ENSG00000173660|ENSG00000162365|ENSG00000186160|	0.00127
19-chr1-45000000-50000000	tetrapyrrole binding	ENSG00000154198|ENSG00000142973|ENSG00000186377|ENSG00000187048|ENSG00000162365|ENSG00000186160|	7.13833e-08
62-chr1-152500000-157500000	receptor activity	ENSG00000132704|ENSG00000180433|ENSG00000143590|ENSG00000188340|ENSG00000186400|ENSG00000186306|ENSG00000158473|ENSG00000158477|ENSG00000198703|ENSG00000197403|ENSG00000143620|ENSG00000173285|ENSG00000196171|ENSG00000163534|ENSG00000160856|ENSG00000198965|ENSG00000198967|ENSG00000186440|ENSG00000162706|ENSG00000143297|ENSG00000180409|ENSG00000160781|ENSG00000198400|ENSG00000027644|ENSG00000197532…	6.45395e-05
63-chr1-155000000-160000000	receptor activity	ENSG00000132704|ENSG00000158869|ENSG00000180433|ENSG00000122223|ENSG00000188340|ENSG00000158731|ENSG00000186400|ENSG00000184155|ENSG00000162739|ENSG00000186306|ENSG00000117090|ENSG00000158473|ENSG00000158477|ENSG00000132185|ENSG00000198703|ENSG00000197403|ENSG00000173285|ENSG00000158882|ENSG00000196171|ENSG00000072694|ENSG00000179639|ENSG00000163534|ENSG00000160856|ENSG00000198965|ENSG00000198967…	0.00632957
98-chr1-242500000-247500000	receptor activity	ENSG00000169214|ENSG00000177186|ENSG00000177212|ENSG00000196936|ENSG00000196944|ENSG00000177476|ENSG00000177174|ENSG00000196071|ENSG00000187080|ENSG00000177489|ENSG00000196079|ENSG00000198281|ENSG00000177535|ENSG00000171180|ENSG00000196539|ENSG00000198601|ENSG00000198118|ENSG00000183310|ENSG00000182783|ENSG00000196772|ENSG00000183130|ENSG00000197437|ENSG00000188558|ENSG00000198452|ENSG00000197454…	1.39838e-05
99-chr1-245000000-250000000	receptor activity	ENSG00000169214|ENSG00000177186|ENSG00000177212|ENSG00000196936|ENSG00000196944|ENSG00000177476|ENSG00000177174|ENSG00000196071|ENSG00000187080|ENSG00000177489|ENSG00000196079|ENSG00000198281|ENSG00000177535|ENSG00000171180|ENSG00000196539|ENSG00000198601|ENSG00000198118|ENSG00000183310|ENSG00000182783|ENSG00000196772|ENSG00000183130|ENSG00000197437|ENSG00000188558|ENSG00000198452|ENSG00000197454…	0.00837825
31-chr2-75000000-80000000	carbohydrate binding	ENSG00000172023|ENSG00000115386|ENSG00000143954|ENSG00000172016|	0.0143573
32-chr2-77500000-82500000	carbohydrate binding	ENSG00000172023|ENSG00000115386|ENSG00000143954|ENSG00000172016|	0.0373476
35-chr2-85000000-90000000	antigen binding	ENSG00000173782|ENSG00000173799|ENSG00000184817|ENSG00000163245|ENSG00000153587|ENSG00000153586|ENSG00000122156|ENSG00000172038|ENSG00000173758|ENSG00000169769|	0.0373476
36-chr2-87500000-92500000	antigen binding	ENSG00000173782|ENSG00000173799|ENSG00000184817|ENSG00000163245|ENSG00000153587|ENSG00000153586|ENSG00000122156|ENSG00000172038|ENSG00000173758|ENSG00000169769|	6.68325e-07
45-chr2-110000000-115000000	receptor binding	ENSG00000125538|ENSG00000136696|ENSG00000136697|ENSG00000136694|ENSG00000136695|ENSG00000125571|ENSG00000115008|ENSG00000136689|ENSG00000136688|	1.60251e-06
45-chr2-110000000-115000000	receptor signaling protein activity	ENSG00000136696|ENSG00000136697|ENSG00000136694|ENSG00000136695|ENSG00000125571|ENSG00000136689|ENSG00000136688|	1.50154e-07
46-chr2-112500000-117500000	receptor binding	ENSG00000125538|ENSG00000136696|ENSG00000136697|ENSG00000136694|ENSG00000136695|ENSG00000125571|ENSG00000115008|ENSG00000136689|ENSG00000136688|	0.00191499
46-chr2-112500000-117500000	receptor signaling protein activity	ENSG00000136696|ENSG00000136697|ENSG00000136694|ENSG00000136695|ENSG00000125571|ENSG00000136689|ENSG00000136688|	0.00891477
70-chr2-172500000-177500000	transcription factor activity	ENSG00000170178|ENSG00000138433|ENSG00000128709|ENSG00000170166|ENSG00000115844|ENSG00000144355|ENSG00000128714|ENSG00000128710|ENSG00000128713|ENSG00000128652|ENSG00000128645|ENSG00000174279|ENSG00000175879|	0.0030323
71-chr2-175000000-180000000	transcription factor activity	ENSG00000170178|ENSG00000128709|ENSG00000170166|ENSG00000128714|ENSG00000128710|ENSG00000128713|ENSG00000128652|ENSG00000116044|ENSG00000128645|ENSG00000174279|ENSG00000175879|	0.013363
71-chr2-175000000-180000000	nucleic acid binding	ENSG00000170178|ENSG00000180228|ENSG00000128709|ENSG00000170166|ENSG00000128714|ENSG00000128710|ENSG00000128713|ENSG00000128652|ENSG00000170144|ENSG00000115966|ENSG00000155636|ENSG00000116044|ENSG00000128645|ENSG00000174279|ENSG00000175879|ENSG00000196285|	0.0201386
83-chr2-205000000-210000000	structural constituent of eye lens	ENSG00000168582|ENSG00000163254|ENSG00000118231|ENSG00000182187|	0.0243124
84-chr2-207500000-212500000	structural constituent of eye lens	ENSG00000168582|ENSG00000163254|ENSG00000118231|ENSG00000182187|	0.000204055
5-chr3-10000000-15000000	neurotransmitter transporter activity	ENSG00000131389|ENSG00000157103|ENSG00000132164|	0.0172373
18-chr3-42500000-47500000	peptide binding	ENSG00000163823|ENSG00000160791|ENSG00000173585|ENSG00000121807|ENSG00000173578|ENSG00000114857|ENSG00000144648|ENSG00000121797|ENSG00000183625|ENSG00000172215|	0.000113739
19-chr3-45000000-50000000	peptide binding	ENSG00000163823|ENSG00000160791|ENSG00000173585|ENSG00000121807|ENSG00000173578|ENSG00000121797|ENSG00000183625|ENSG00000172215|	0.000204653
40-chr3-97500000-102500000	receptor activity	ENSG00000196098|ENSG00000187900|ENSG00000183185|ENSG00000197938|ENSG00000188974|ENSG00000154165|ENSG00000196578|ENSG00000144820|ENSG00000197036|ENSG00000197621|ENSG00000181828|	0.0091328
59-chr3-145000000-150000000	lipid transporter activity	ENSG00000188313|ENSG00000163746|ENSG00000114698|	0.0351811
18-chr4-42500000-47500000	ion transporter activity	ENSG00000163285|ENSG00000163288|ENSG00000183783|ENSG00000151834|ENSG00000124399|ENSG00000145246|ENSG00000109158|ENSG00000170516|	0.000262467
18-chr4-42500000-47500000	channel or pore class transporter activity	ENSG00000163285|ENSG00000163288|ENSG00000183783|ENSG00000151834|ENSG00000109158|	0.00130264
18-chr4-42500000-47500000	neurotransmitter binding	ENSG00000163285|ENSG00000163288|ENSG00000151834|ENSG00000109158|	0.000124838
19-chr4-45000000-50000000	ion transporter activity	ENSG00000163285|ENSG00000163288|ENSG00000151834|ENSG00000145248|ENSG00000145246|ENSG00000198515|ENSG00000109158|ENSG00000170516|	4.32441e-42
19-chr4-45000000-50000000	channel or pore class transporter activity	ENSG00000163285|ENSG00000163288|ENSG00000151834|ENSG00000198515|ENSG00000109158|	1.24229e-15
19-chr4-45000000-50000000	neurotransmitter binding	ENSG00000163285|ENSG00000163288|ENSG00000151834|ENSG00000109158|	0.000647511
28-chr4-67500000-72500000	transferase activity	ENSG00000171234|ENSG00000135226|ENSG00000135220|ENSG00000197888|ENSG00000198277|ENSG00000109193|ENSG00000197592|ENSG00000173610|ENSG00000109181|ENSG00000156136|ENSG00000173597|ENSG00000156096|	2.97582e-12
30-chr4-72500000-77500000	receptor binding	ENSG00000109321|ENSG00000109272|ENSG00000169429|ENSG00000124882|ENSG00000174808|ENSG00000138755|ENSG00000163739|ENSG00000163737|ENSG00000163736|ENSG00000163735|ENSG00000163734|ENSG00000124875|ENSG00000081041|ENSG00000169245|ENSG00000169248|	2.09339e-57
31-chr4-75000000-80000000	receptor binding	ENSG00000156234|ENSG00000109321|ENSG00000124882|ENSG00000174808|ENSG00000138755|ENSG00000163737|ENSG00000163736|ENSG00000163735|ENSG00000163734|ENSG00000081041|ENSG00000169245|ENSG00000169248|	1.66464e-20
40-chr4-97500000-102500000	oxidoreductase activity	ENSG00000109238|ENSG00000197894|ENSG00000187758|ENSG00000196616|ENSG00000196344|ENSG00000198099|ENSG00000172955|	3.18871e-05
40-chr4-97500000-102500000	electron transporter activity	ENSG00000109238|ENSG00000197894|ENSG00000196616|ENSG00000196344|ENSG00000172955|	4.28135e-09
56-chr5-137500000-142500000	protein binding	ENSG00000113212|ENSG00000113211|ENSG00000197479|ENSG00000187678|ENSG00000120725|ENSG00000120727|ENSG00000187372|ENSG00000120328|ENSG00000113578|ENSG00000171815|ENSG00000120322|ENSG00000120324|ENSG00000120327|ENSG00000146013|ENSG00000113013|ENSG00000113248|ENSG00000112852|ENSG00000113555|ENSG00000113108|ENSG00000131503|ENSG00000158458|ENSG00000178913|ENSG00000131504|ENSG00000044115|ENSG00000081853…	2.53145e-07
57-chr5-140000000-145000000	ion binding	ENSG00000113212|ENSG00000113211|ENSG00000197479|ENSG00000113580|ENSG00000187372|ENSG00000120328|ENSG00000171815|ENSG00000120322|ENSG00000120324|ENSG00000120327|ENSG00000113248|ENSG00000112852|ENSG00000113555|ENSG00000146007|ENSG00000146001|ENSG00000120318|ENSG00000081853|ENSG00000196963|ENSG00000013561|ENSG00000081842|ENSG00000156453|ENSG00000113205|ENSG00000113209|ENSG00000081818|	2.53145e-07
57-chr5-140000000-145000000	protein binding	ENSG00000113212|ENSG00000113211|ENSG00000197479|ENSG00000187678|ENSG00000113580|ENSG00000187372|ENSG00000120328|ENSG00000113578|ENSG00000171815|ENSG00000120322|ENSG00000120324|ENSG00000120327|ENSG00000113248|ENSG00000112852|ENSG00000113555|ENSG00000178913|ENSG00000131504|ENSG00000081853|ENSG00000196963|ENSG00000013561|ENSG00000081842|ENSG00000156453|ENSG00000113205|ENSG00000183775|ENSG00000113209…	0.00529454
64-chr5-157500000-162500000	neurotransmitter binding	ENSG00000145863|ENSG00000145864|ENSG00000113327|ENSG00000022355|	0.00272865
65-chr5-160000000-165000000	channel or pore class transporter activity	ENSG00000145863|ENSG00000145864|ENSG00000113327|ENSG00000022355|	0.0494834
65-chr5-160000000-165000000	neurotransmitter binding	ENSG00000145863|ENSG00000145864|ENSG00000113327|ENSG00000022355|	0.0401966
10-chr6-22500000-27500000	nucleic acid binding	ENSG00000187837|ENSG00000196787|ENSG00000124693|ENSG00000187475|ENSG00000168274|ENSG00000197846|ENSG00000180573|ENSG00000137259|ENSG00000196532|ENSG00000188987|ENSG00000187990|ENSG00000124635|ENSG00000182952|ENSG00000124529|ENSG00000196176|ENSG00000124532|ENSG00000197459|ENSG00000164508|ENSG00000197903|ENSG00000181315|ENSG00000180596|ENSG00000198366|ENSG00000124642|ENSG00000196966|ENSG00000197061…	1.41213e-09
11-chr6-25000000-30000000	nucleic acid binding	ENSG00000187837|ENSG00000196787|ENSG00000124693|ENSG00000187475|ENSG00000197279|ENSG00000197202|ENSG00000189298|ENSG00000168274|ENSG00000197153|ENSG00000197846|ENSG00000187626|ENSG00000180573|ENSG00000137259|ENSG00000196866|ENSG00000198558|ENSG00000196532|ENSG00000188987|ENSG00000187990|ENSG00000184348|ENSG00000196747|ENSG00000124635|ENSG00000182952|ENSG00000137185|ENSG00000187987|ENSG00000198315…	0.00158164
12-chr6-27500000-32500000	transcription factor activity	ENSG00000197279|ENSG00000197202|ENSG00000189298|ENSG00000137310|ENSG00000187626|ENSG00000066379|ENSG00000137185|ENSG00000137411|ENSG00000187987|ENSG00000198315|ENSG00000196812|ENSG00000197062|ENSG00000137338|ENSG00000197657|ENSG00000158691|	1.87634e-12
12-chr6-27500000-32500000	nucleic acid binding	ENSG00000197279|ENSG00000197202|ENSG00000189298|ENSG00000137310|ENSG00000137313|ENSG00000197153|ENSG00000187626|ENSG00000196866|ENSG00000198558|ENSG00000066379|ENSG00000184348|ENSG00000196747|ENSG00000137185|ENSG00000137411|ENSG00000187987|ENSG00000198315|ENSG00000196812|ENSG00000197238|ENSG00000198374|ENSG00000184357|ENSG00000185130|ENSG00000196374|ENSG00000197062|ENSG00000137338|ENSG00000197914…	5.88226e-19
10-chr7-22500000-27500000	transcription factor activity	ENSG00000005073|ENSG00000050344|ENSG00000106031|ENSG00000105991|ENSG00000105997|ENSG00000105996|ENSG00000106038|ENSG00000078399|ENSG00000197576|ENSG00000153807|ENSG00000106004|ENSG00000106006|ENSG00000122592|	0.000125572
10-chr7-22500000-27500000	nucleic acid binding	ENSG00000005073|ENSG00000177093|ENSG00000050344|ENSG00000164548|ENSG00000106031|ENSG00000105991|ENSG00000105997|ENSG00000105996|ENSG00000070882|ENSG00000106038|ENSG00000122566|ENSG00000136231|ENSG00000136243|ENSG00000078399|ENSG00000197576|ENSG00000153807|ENSG00000106004|ENSG00000106006|ENSG00000122592|ENSG00000196335|	0.0158755
11-chr7-25000000-30000000	transcription factor activity	ENSG00000146592|ENSG00000005073|ENSG00000050344|ENSG00000106031|ENSG00000105991|ENSG00000105997|ENSG00000105996|ENSG00000106038|ENSG00000078399|ENSG00000197576|ENSG00000153807|ENSG00000106004|ENSG00000106006|ENSG00000122592|	0.0107874
11-chr7-25000000-30000000	nucleic acid binding	ENSG00000146592|ENSG00000005073|ENSG00000177093|ENSG00000050344|ENSG00000106031|ENSG00000105991|ENSG00000105997|ENSG00000105996|ENSG00000106038|ENSG00000122566|ENSG00000153814|ENSG00000078399|ENSG00000197576|ENSG00000153807|ENSG00000106004|ENSG00000106006|ENSG00000106052|ENSG00000122592|	7.35041e-07
25-chr7-60000000-65000000	nucleic acid binding	ENSG00000197008|ENSG00000198039|ENSG00000196247|ENSG00000173041|ENSG00000146757|ENSG00000197123|ENSG00000152926|	4.56051e-05
39-chr7-95000000-100000000	tetrapyrrole binding	ENSG00000106258|ENSG00000160870|ENSG00000160868|ENSG00000187851|ENSG00000021461|	0.016348
34-chr8-82500000-87500000	lyase activity	ENSG00000185015|ENSG00000164879|ENSG00000104267|ENSG00000133742|	0.0107874
35-chr8-85000000-90000000	lyase activity	ENSG00000185015|ENSG00000164879|ENSG00000104267|ENSG00000133742|	0.00344711
8-chr9-17500000-22500000	receptor binding	ENSG00000171855|ENSG00000120235|ENSG00000188379|ENSG00000147885|ENSG00000186809|ENSG00000120247|ENSG00000186803|ENSG00000120242|ENSG00000137080|ENSG00000147877|ENSG00000177047|ENSG00000147873|ENSG00000184995|ENSG00000137026|	5.09252e-12
8-chr9-17500000-22500000	protein binding	ENSG00000198642|ENSG00000171855|ENSG00000120235|ENSG00000188379|ENSG00000147889|ENSG00000147885|ENSG00000186809|ENSG00000120247|ENSG00000186803|ENSG00000120242|ENSG00000137080|ENSG00000147877|ENSG00000177047|ENSG00000147873|ENSG00000107295|ENSG00000184995|ENSG00000137026|	1.92073e-05
9-chr9-20000000-25000000	receptor binding	ENSG00000171855|ENSG00000120235|ENSG00000188379|ENSG00000147885|ENSG00000186809|ENSG00000120247|ENSG00000186803|ENSG00000120242|ENSG00000137080|ENSG00000147877|ENSG00000177047|ENSG00000147873|ENSG00000184995|ENSG00000137026|	4.11035e-06
9-chr9-20000000-25000000	protein binding	ENSG00000198642|ENSG00000171855|ENSG00000120235|ENSG00000188379|ENSG00000147889|ENSG00000147885|ENSG00000186809|ENSG00000120247|ENSG00000186803|ENSG00000120242|ENSG00000137080|ENSG00000147877|ENSG00000177047|ENSG00000147873|ENSG00000184995|ENSG00000137026|	0.0136271
49-chr9-120000000-125000000	receptor activity	ENSG00000136832|ENSG00000136834|ENSG00000171459|ENSG00000136939|ENSG00000171496|ENSG00000197233|ENSG00000173679|ENSG00000171484|ENSG00000171481|ENSG00000171505|ENSG00000165202|ENSG00000165204|ENSG00000171501|ENSG00000188394|ENSG00000148215|	0.0193389
50-chr9-122500000-127500000	receptor activity	ENSG00000136832|ENSG00000136834|ENSG00000171459|ENSG00000148200|ENSG00000136939|ENSG00000136931|ENSG00000171496|ENSG00000185585|ENSG00000197233|ENSG00000173679|ENSG00000180264|ENSG00000171484|ENSG00000171481|ENSG00000171505|ENSG00000165202|ENSG00000165204|ENSG00000171501|ENSG00000188394|ENSG00000148215|	0.0200664
55-chr9-135000000-140000000	odorant binding	ENSG00000122136|ENSG00000171102|ENSG00000148386|	0.0468906
56-chr9-137500000-142500000	odorant binding	ENSG00000122136|ENSG00000148386|	0.0241572
32-chr10-77500000-82500000	carbohydrate binding	ENSG00000122854|ENSG00000122852|ENSG00000182314|ENSG00000133661|ENSG00000185303|	0.00577474
33-chr10-80000000-85000000	carbohydrate binding	ENSG00000122854|ENSG00000122852|ENSG00000182314|ENSG00000133661|ENSG00000185303|	0.0309023
38-chr10-92500000-97500000	tetrapyrrole binding	ENSG00000165841|ENSG00000138109|ENSG00000108242|ENSG00000095596|ENSG00000187553|ENSG00000138115|ENSG00000165338|	5.75479e-06
39-chr10-95000000-100000000	tetrapyrrole binding	ENSG00000165841|ENSG00000138109|ENSG00000108242|ENSG00000138115|	0.0159277
1-chr11-0-5000000	receptor activity	ENSG00000176893|ENSG00000176895|ENSG00000069696|ENSG00000175609|ENSG00000176879|ENSG00000176900|ENSG00000176904|ENSG00000176937|ENSG00000188069|ENSG00000185187|ENSG00000197790|ENSG00000182170|ENSG00000176925|ENSG00000196778|ENSG00000176922|ENSG00000176951|ENSG00000197428|ENSG00000197674|ENSG00000184350|ENSG00000167332|ENSG00000176798|ENSG00000171999|ENSG00000148985|ENSG00000129749|ENSG00000177106…	3.32811e-07
2-chr11-2500000-7500000	receptor activity	ENSG00000184698|ENSG00000184881|ENSG00000176893|ENSG00000176895|ENSG00000167355|ENSG00000170782|ENSG00000167359|ENSG00000175609|ENSG00000180923|ENSG00000181009|ENSG00000183251|ENSG00000176787|ENSG00000176879|ENSG00000181074|ENSG00000181001|ENSG00000181609|ENSG00000187918|ENSG00000176900|ENSG00000180909|ENSG00000176904|ENSG00000176937|ENSG00000188069|ENSG00000180913|ENSG00000180919|ENSG00000197790…	0.0172373
3-chr11-5000000-10000000	receptor activity	ENSG00000184698|ENSG00000184881|ENSG00000167355|ENSG00000170782|ENSG00000167359|ENSG00000180923|ENSG00000181009|ENSG00000183251|ENSG00000176787|ENSG00000181074|ENSG00000181001|ENSG00000170683|ENSG00000181609|ENSG00000187918|ENSG00000180909|ENSG00000170688|ENSG00000182334|ENSG00000180913|ENSG00000180919|ENSG00000183313|ENSG00000181616|ENSG00000176748|ENSG00000180974|ENSG00000167360|ENSG00000176239…	6.34818e-22
20-chr11-47500000-52500000	receptor activity	ENSG00000186483|ENSG00000149177|ENSG00000176537|ENSG00000185926|ENSG00000176555|ENSG00000178306|ENSG00000176540|ENSG00000176547|ENSG00000175619|ENSG00000109920|ENSG00000176567|ENSG00000172208|	7.66934e-16
21-chr11-50000000-55000000	receptor activity	ENSG00000186483|ENSG00000181950|ENSG00000181958|ENSG00000176537|ENSG00000185926|ENSG00000181961|	9.95579e-18
22-chr11-52500000-57500000	receptor activity	ENSG00000149133|ENSG00000172459|ENSG00000172457|ENSG00000181903|ENSG00000172199|ENSG00000172489|ENSG00000172487|ENSG00000166693|ENSG00000181689|ENSG00000172188|ENSG00000186117|ENSG00000172464|ENSG00000181950|ENSG00000181693|ENSG00000184741|ENSG00000186113|ENSG00000181282|ENSG00000186907|ENSG00000181698|ENSG00000172154|ENSG00000181837|ENSG00000181958|ENSG00000174937|ENSG00000186119|ENSG00000181935…	1.06674e-11
23-chr11-55000000-60000000	receptor activity	ENSG00000166928|ENSG00000172774|ENSG00000149516|ENSG00000166927|ENSG00000166926|ENSG00000156738|ENSG00000172772|ENSG00000149133|ENSG00000172459|ENSG00000172457|ENSG00000186509|ENSG00000172289|ENSG00000172381|ENSG00000176200|ENSG00000176205|ENSG00000181903|ENSG00000172199|ENSG00000172489|ENSG00000172487|ENSG00000166884|ENSG00000198283|ENSG00000166693|ENSG00000181689|ENSG00000172188|ENSG00000186117…	0.0129256
24-chr11-57500000-62500000	receptor activity	ENSG00000166959|ENSG00000166928|ENSG00000172774|ENSG00000149516|ENSG00000166927|ENSG00000166926|ENSG00000156738|ENSG00000172772|ENSG00000186509|ENSG00000172289|ENSG00000172381|ENSG00000176200|ENSG00000176205|ENSG00000110448|ENSG00000166884|ENSG00000198283|ENSG00000149534|ENSG00000196779|ENSG00000110079|ENSG00000168539|ENSG00000180475|ENSG00000197887|ENSG00000110077|ENSG00000172377|ENSG00000183134…	0.0421557
41-chr11-100000000-105000000	hydrolase activity	ENSG00000137745|ENSG00000137673|ENSG00000118168|ENSG00000137675|ENSG00000137674|ENSG00000118113|ENSG00000149968|ENSG00000196611|ENSG00000166670|ENSG00000110347|ENSG00000196954|ENSG00000137757|ENSG00000137752|ENSG00000170967|	0.0012163
49-chr11-120000000-125000000	receptor activity	ENSG00000181457|ENSG00000197309|ENSG00000196099|ENSG00000181518|ENSG00000197849|ENSG00000181499|ENSG00000198674|ENSG00000196661|ENSG00000173365|ENSG00000196341|ENSG00000196403|ENSG00000196248|ENSG00000196703|ENSG00000149403|ENSG00000181214|ENSG00000154134|ENSG00000154133|ENSG00000171014|ENSG00000182634|ENSG00000137642|ENSG00000186268|ENSG00000198657|ENSG00000197263|ENSG00000196119|ENSG00000197125…	0.0464395
50-chr11-122500000-127500000	receptor activity	ENSG00000181457|ENSG00000197309|ENSG00000196099|ENSG00000181518|ENSG00000197849|ENSG00000181499|ENSG00000198674|ENSG00000150455|ENSG00000196661|ENSG00000173365|ENSG00000196341|ENSG00000196403|ENSG00000196248|ENSG00000196703|ENSG00000181214|ENSG00000154134|ENSG00000154133|ENSG00000171014|ENSG00000182634|ENSG00000186268|ENSG00000198657|ENSG00000197263|ENSG00000196119|ENSG00000197125|ENSG00000170953|	2.83902e-07
3-chr12-5000000-10000000	carbohydrate binding	ENSG00000150045|ENSG00000198178|ENSG00000111729|ENSG00000069493|ENSG00000110848|ENSG00000111796|ENSG00000003056|ENSG00000110852|ENSG00000188393|ENSG00000166523|ENSG00000166527|ENSG00000139187|	1.30365e-06
4-chr12-7500000-12500000	carbohydrate binding	ENSG00000197992|ENSG00000172243|ENSG00000021602|ENSG00000150045|ENSG00000134539|ENSG00000150048|ENSG00000188402|ENSG00000198178|ENSG00000111729|ENSG00000183542|ENSG00000069493|ENSG00000110848|ENSG00000165682|ENSG00000173391|ENSG00000111796|ENSG00000003056|ENSG00000110852|ENSG00000134545|ENSG00000188393|ENSG00000172322|ENSG00000166523|ENSG00000166527|ENSG00000139187|	1.89876e-14
4-chr12-7500000-12500000	receptor activity	ENSG00000197992|ENSG00000173342|ENSG00000172243|ENSG00000021602|ENSG00000150045|ENSG00000134539|ENSG00000121377|ENSG00000177575|ENSG00000197870|ENSG00000171860|ENSG00000111729|ENSG00000183542|ENSG00000069493|ENSG00000070018|ENSG00000110848|ENSG00000165682|ENSG00000173391|ENSG00000111796|ENSG00000003056|ENSG00000134551|ENSG00000186136|ENSG00000134545|ENSG00000121318|ENSG00000196229|ENSG00000121314…	2.57933e-05
5-chr12-10000000-15000000	carbohydrate binding	ENSG00000197992|ENSG00000172243|ENSG00000021602|ENSG00000134539|ENSG00000150048|ENSG00000188402|ENSG00000183542|ENSG00000165682|ENSG00000173391|ENSG00000134545|ENSG00000172322|	8.49275e-05
5-chr12-10000000-15000000	receptor activity	ENSG00000197992|ENSG00000173342|ENSG00000172243|ENSG00000021602|ENSG00000134539|ENSG00000121377|ENSG00000111291|ENSG00000150086|ENSG00000197870|ENSG00000183542|ENSG00000013588|ENSG00000070019|ENSG00000070018|ENSG00000165682|ENSG00000173391|ENSG00000183150|ENSG00000134551|ENSG00000186136|ENSG00000134545|ENSG00000121318|ENSG00000196229|ENSG00000121314|ENSG00000172322|ENSG00000121381|ENSG00000183935|	5.37354e-10
19-chr12-45000000-50000000	water transporter activity	ENSG00000167580|ENSG00000161798|ENSG00000086159|	0.0309023
20-chr12-47500000-52500000	water transporter activity	ENSG00000167580|ENSG00000161798|ENSG00000086159|	0.0421557
20-chr12-47500000-52500000	structural constituent of cytoskeleton	ENSG00000186081|ENSG00000172867|ENSG00000185479|ENSG00000167768|ENSG00000111057|ENSG00000170465|	0.0401966
21-chr12-50000000-55000000	structural constituent of cytoskeleton	ENSG00000186081|ENSG00000172867|ENSG00000185479|ENSG00000167768|ENSG00000111057|ENSG00000170465|	5.97107e-06
7-chr14-15000000-20000000	receptor activity	ENSG00000169484|ENSG00000169488|ENSG00000176299|ENSG00000176294|ENSG00000182652|ENSG00000176230|ENSG00000176246|ENSG00000176253|ENSG00000155249|ENSG00000176198|ENSG00000196832|ENSG00000186445|ENSG00000176281|ENSG00000196143|ENSG00000165762|ENSG00000176312|ENSG00000184394|ENSG00000176213|ENSG00000176219|	0.0378292
8-chr14-17500000-22500000	receptor activity	ENSG00000181803|ENSG00000169484|ENSG00000169488|ENSG00000129563|ENSG00000176299|ENSG00000176294|ENSG00000092217|ENSG00000197324|ENSG00000182652|ENSG00000176230|ENSG00000176246|ENSG00000165804|ENSG00000169327|ENSG00000176253|ENSG00000155249|ENSG00000176198|ENSG00000169208|ENSG00000196832|ENSG00000186445|ENSG00000169202|ENSG00000176281|ENSG00000196143|ENSG00000165762|ENSG00000176312|ENSG00000172611…	0.0378292
37-chr14-90000000-95000000	enzyme inhibitor activity	ENSG00000165951|ENSG00000165953|ENSG00000170099|ENSG00000187483|ENSG00000197249|ENSG00000100665|ENSG00000170054|ENSG00000186910|ENSG00000196136|ENSG00000140093|ENSG00000188488|	0.0327163
38-chr14-92500000-97500000	enzyme inhibitor activity	ENSG00000165951|ENSG00000165953|ENSG00000170099|ENSG00000187483|ENSG00000197249|ENSG00000100665|ENSG00000170054|ENSG00000186910|ENSG00000196136|ENSG00000140093|ENSG00000188488|	2.65822e-05
43-chr14-105000000-110000000	antigen binding	ENSG00000130076|ENSG00000177154|ENSG00000177199|	2.89722e-06
9-chr15-20000000-25000000	neurotransmitter binding	ENSG00000186297|ENSG00000182256|ENSG00000166206|	0.00257808
10-chr15-22500000-27500000	neurotransmitter binding	ENSG00000186297|ENSG00000182256|ENSG00000166206|	0.00257808
31-chr15-75000000-80000000	amine binding	ENSG00000080644|ENSG00000117971|ENSG00000169684|	0.00245565
4-chr17-7500000-12500000	microfilament motor activity	ENSG00000006788|ENSG00000125414|ENSG00000109063|ENSG00000109061|ENSG00000141048|	0.0127432
5-chr17-10000000-15000000	microfilament motor activity	ENSG00000006788|ENSG00000125414|ENSG00000109063|ENSG00000109061|ENSG00000141048|	5.27693e-07
12-chr17-27500000-32500000	receptor binding	ENSG00000108688|ENSG00000108278|ENSG00000167236|ENSG00000161573|ENSG00000161570|ENSG00000161574|ENSG00000172156|ENSG00000108700|ENSG00000108702|ENSG00000129277|ENSG00000108691|ENSG00000006074|ENSG00000006075|ENSG00000181374|	0.00415114
14-chr17-32500000-37500000	structural constituent of epidermis	ENSG00000186395|ENSG00000126337|ENSG00000188581|	0.000131155
14-chr17-32500000-37500000	structural constituent of cytoskeleton	ENSG00000186831|ENSG00000186832|ENSG00000171345|ENSG00000171346|ENSG00000171403|ENSG00000171401|ENSG00000094796|ENSG00000171431|ENSG00000186847|	0.000230784
15-chr17-35000000-40000000	structural constituent of epidermis	ENSG00000186395|ENSG00000126337|ENSG00000188581|	6.18113e-42
15-chr17-35000000-40000000	structural constituent of cytoskeleton	ENSG00000131462|ENSG00000186831|ENSG00000186832|ENSG00000037042|ENSG00000171345|ENSG00000171346|ENSG00000171403|ENSG00000171401|ENSG00000094796|ENSG00000171431|ENSG00000186847|	2.98001e-11
18-chr17-42500000-47500000	transcription factor activity	ENSG00000082641|ENSG00000108813|ENSG00000159184|ENSG00000120093|ENSG00000120094|ENSG00000120075|ENSG00000182742|ENSG00000170689|ENSG00000064195|ENSG00000108511|ENSG00000073861|ENSG00000173917|ENSG00000120068|ENSG00000120087|ENSG00000136504|	1.62684e-56
23-chr17-55000000-60000000	structural constituent of chorion (sensu Insecta)	ENSG00000136487|ENSG00000136488|	0.000131155
24-chr17-57500000-62500000	structural constituent of chorion (sensu Insecta)	ENSG00000136487|ENSG00000136488|	1.18643e-08
23-chr18-55000000-60000000	enzyme inhibitor activity	ENSG00000197641|ENSG00000197632|ENSG00000166634|ENSG00000166401|ENSG00000166404|ENSG00000166396|ENSG00000057149|	3.18987e-06
24-chr18-57500000-62500000	enzyme inhibitor activity	ENSG00000197641|ENSG00000197632|ENSG00000166634|ENSG00000166401|ENSG00000166404|ENSG00000166396|ENSG00000057149|	1.06287e-06
4-chr19-7500000-12500000	nucleic acid binding	ENSG00000130803|ENSG00000196646|ENSG00000197647|ENSG00000196484|ENSG00000161847|ENSG00000196757|ENSG00000198028|ENSG00000198342|ENSG00000198551|ENSG00000177599|ENSG00000129351|ENSG00000197332|ENSG00000196466|ENSG00000171469|ENSG00000171466|ENSG00000197044|ENSG00000197933|ENSG00000161914|ENSG00000196826|ENSG00000066044|ENSG00000133250|ENSG00000099783|ENSG00000127616|ENSG00000188629|ENSG00000197961…	0.0112517
6-chr19-12500000-17500000	tetrapyrrole binding	ENSG00000186204|ENSG00000186115|ENSG00000171954|ENSG00000171903|ENSG00000186526|ENSG00000186529|	0.0473784
7-chr19-15000000-20000000	tetrapyrrole binding	ENSG00000186204|ENSG00000186115|ENSG00000171954|ENSG00000171903|ENSG00000186526|ENSG00000186529|	0.034313
8-chr19-17500000-22500000	nucleic acid binding	ENSG00000064607|ENSG00000105640|ENSG00000181896|ENSG00000197020|ENSG00000167491|ENSG00000198521|ENSG00000104777|ENSG00000196268|ENSG00000105717|ENSG00000105705|ENSG00000064490|ENSG00000105708|ENSG00000160352|ENSG00000105750|ENSG00000184635|ENSG00000196705|ENSG00000105671|ENSG00000196721|ENSG00000172687|ENSG00000160229|ENSG00000005007|ENSG00000130522|ENSG00000130520|ENSG00000197124|ENSG00000118620…	0.0335193
9-chr19-20000000-25000000	nucleic acid binding	ENSG00000197020|ENSG00000167232|ENSG00000198521|ENSG00000104777|ENSG00000196268|ENSG00000196172|ENSG00000196350|ENSG00000197360|ENSG00000160352|ENSG00000183850|ENSG00000105750|ENSG00000197372|ENSG00000196705|ENSG00000196721|ENSG00000172687|ENSG00000160229|ENSG00000180081|ENSG00000196686|ENSG00000118620|ENSG00000197134|	0.0392108
9-chr19-20000000-25000000	ion binding	ENSG00000197020|ENSG00000167232|ENSG00000198521|ENSG00000104777|ENSG00000196268|ENSG00000196172|ENSG00000196350|ENSG00000197360|ENSG00000160352|ENSG00000183850|ENSG00000105750|ENSG00000197372|ENSG00000196705|ENSG00000160229|ENSG00000196686|ENSG00000118620|ENSG00000197134|	1.63046e-10
10-chr19-22500000-27500000	nucleic acid binding	ENSG00000167232|ENSG00000196172|ENSG00000196350|ENSG00000197360|ENSG00000183850|ENSG00000197372|ENSG00000180081|ENSG00000196686|	0.00128186
16-chr19-37500000-42500000	nucleic acid binding	ENSG00000161298|ENSG00000089335|ENSG00000161277|ENSG00000142065|ENSG00000181007|ENSG00000105261|ENSG00000186017|ENSG00000105698|ENSG00000076650|ENSG00000197863|ENSG00000126254|ENSG00000196357|ENSG00000189042|ENSG00000105258|ENSG00000197800|ENSG00000198453|ENSG00000196761|ENSG00000153879|ENSG00000197808|ENSG00000153896|ENSG00000188283|ENSG00000161265|ENSG00000180884|ENSG00000185869|ENSG00000196967…	0.0463373
16-chr19-37500000-42500000	ion binding	ENSG00000161298|ENSG00000089335|ENSG00000161277|ENSG00000142065|ENSG00000181007|ENSG00000105261|ENSG00000186017|ENSG00000142279|ENSG00000197863|ENSG00000196357|ENSG00000189042|ENSG00000105258|ENSG00000197800|ENSG00000198453|ENSG00000126247|ENSG00000196761|ENSG00000197808|ENSG00000153896|ENSG00000188283|ENSG00000161265|ENSG00000180884|ENSG00000185869|ENSG00000196967|ENSG00000105663|ENSG00000168813…	1.28013e-11
17-chr19-40000000-45000000	carbohydrate binding	ENSG00000105695|ENSG00000012124|ENSG00000197778|ENSG00000006659|ENSG00000178934|ENSG00000171747|ENSG00000105198|ENSG00000167635|ENSG00000105205|ENSG00000105290|	2.34227e-18
17-chr19-40000000-45000000	nucleic acid binding	ENSG00000128011|ENSG00000161298|ENSG00000128016|ENSG00000161277|ENSG00000142065|ENSG00000104824|ENSG00000181007|ENSG00000105261|ENSG00000178982|ENSG00000186017|ENSG00000196437|ENSG00000011332|ENSG00000198182|ENSG00000171817|ENSG00000181666|ENSG00000105698|ENSG00000197863|ENSG00000126254|ENSG00000189144|ENSG00000180479|ENSG00000196357|ENSG00000189042|ENSG00000105258|ENSG00000197800|ENSG00000198453…	0.000198201
17-chr19-40000000-45000000	ion binding	ENSG00000161298|ENSG00000128016|ENSG00000161277|ENSG00000142065|ENSG00000181007|ENSG00000105261|ENSG00000171777|ENSG00000186017|ENSG00000196218|ENSG00000196437|ENSG00000011332|ENSG00000198182|ENSG00000171817|ENSG00000181666|ENSG00000197863|ENSG00000189144|ENSG00000180479|ENSG00000196357|ENSG00000189042|ENSG00000105258|ENSG00000130402|ENSG00000099337|ENSG00000197800|ENSG00000198453|ENSG00000126247…	1.04034e-05
18-chr19-42500000-47500000	tetrapyrrole binding	ENSG00000167600|ENSG00000130612|ENSG00000197408|ENSG00000197446|ENSG00000198077|ENSG00000197573|ENSG00000197838|ENSG00000198461|	0.000148855
19-chr19-45000000-50000000	tetrapyrrole binding	ENSG00000167600|ENSG00000130612|ENSG00000197408|ENSG00000197446|ENSG00000198077|ENSG00000197573|ENSG00000197838|ENSG00000198461|	0.0079722
19-chr19-45000000-50000000	nucleic acid binding	ENSG00000178386|ENSG00000176472|ENSG00000018607|ENSG00000028277|ENSG00000062370|ENSG00000079432|ENSG00000187187|ENSG00000184280|ENSG00000186019|ENSG00000197782|ENSG00000105323|ENSG00000159915|ENSG00000176232|ENSG00000077312|ENSG00000159885|ENSG00000142025|ENSG00000159882|ENSG00000105732|ENSG00000131115|ENSG00000131116|ENSG00000124459|ENSG00000073050|ENSG00000105372|ENSG00000167383|ENSG00000105722…	4.82716e-12
19-chr19-45000000-50000000	ion binding	ENSG00000178386|ENSG00000105409|ENSG00000176472|ENSG00000018607|ENSG00000062370|ENSG00000090006|ENSG00000167600|ENSG00000187187|ENSG00000142046|ENSG00000184280|ENSG00000105429|ENSG00000186019|ENSG00000130612|ENSG00000197782|ENSG00000197408|ENSG00000142273|ENSG00000159915|ENSG00000176232|ENSG00000159885|ENSG00000159882|ENSG00000105732|ENSG00000131115|ENSG00000131116|ENSG00000124459|ENSG00000105755…	1.50971e-05
20-chr19-47500000-52500000	nucleic acid binding	ENSG00000178386|ENSG00000176472|ENSG00000018607|ENSG00000062370|ENSG00000104856|ENSG00000104967|ENSG00000184280|ENSG00000170684|ENSG00000186019|ENSG00000188425|ENSG00000130751|ENSG00000159915|ENSG00000176232|ENSG00000159885|ENSG00000130749|ENSG00000159882|ENSG00000012061|ENSG00000131115|ENSG00000131116|ENSG00000124459|ENSG00000104884|ENSG00000125740|ENSG00000073050|ENSG00000167383|ENSG00000167380…	0.0244528
23-chr19-55000000-60000000	carbohydrate binding	ENSG00000129450|ENSG00000105501|ENSG00000105366|ENSG00000105383|ENSG00000105472|ENSG00000161640|ENSG00000105492|ENSG00000142512|ENSG00000168995|ENSG00000160296|	0.0335193
23-chr19-55000000-60000000	antigen binding	ENSG00000105568|ENSG00000187095|ENSG00000186818|ENSG00000170866|ENSG00000104974|	5.97107e-06
24-chr19-57500000-62500000	nucleic acid binding	ENSG00000198046|ENSG00000171425|ENSG00000196417|ENSG00000018869|ENSG00000197025|ENSG00000197951|ENSG00000198346|ENSG00000142409|ENSG00000196867|ENSG00000142396|ENSG00000196263|ENSG00000130844|ENSG00000198603|ENSG00000197497|ENSG00000198440|ENSG00000167562|ENSG00000179943|ENSG00000197714|ENSG00000170949|ENSG00000197937|ENSG00000063244|ENSG00000198300|ENSG00000141946|ENSG00000182909|ENSG00000198304…	5.97107e-06
25-chr19-60000000-65000000	nucleic acid binding	ENSG00000198046|ENSG00000152475|ENSG00000186272|ENSG00000119574|ENSG00000171425|ENSG00000083828|ENSG00000181894|ENSG00000018869|ENSG00000173480|ENSG00000197025|ENSG00000171606|ENSG00000197951|ENSG00000176293|ENSG00000121406|ENSG00000142409|ENSG00000196867|ENSG00000186974|ENSG00000196263|ENSG00000121417|ENSG00000130726|ENSG00000121413|ENSG00000198440|ENSG00000179943|ENSG00000197714|ENSG00000178935…	4.13848e-07
25-chr19-60000000-65000000	ion binding	ENSG00000198046|ENSG00000152475|ENSG00000186272|ENSG00000119574|ENSG00000171425|ENSG00000083828|ENSG00000181894|ENSG00000018869|ENSG00000173480|ENSG00000197025|ENSG00000171606|ENSG00000197951|ENSG00000176293|ENSG00000121406|ENSG00000142409|ENSG00000196867|ENSG00000196263|ENSG00000121417|ENSG00000130726|ENSG00000121413|ENSG00000198440|ENSG00000179943|ENSG00000197714|ENSG00000178935|ENSG00000152433…	2.14137e-07
26-chr19-62500000-67500000	transcription factor activity	ENSG00000171606|ENSG00000176293|ENSG00000121417|ENSG00000130726|ENSG00000121413|ENSG00000182318|ENSG00000180532|ENSG00000152454|ENSG00000152467|ENSG00000099326|ENSG00000131849|ENSG00000083838|ENSG00000179909|	2.67421e-22
26-chr19-62500000-67500000	nucleic acid binding	ENSG00000152475|ENSG00000186272|ENSG00000119574|ENSG00000083828|ENSG00000181894|ENSG00000173480|ENSG00000171606|ENSG00000176293|ENSG00000121406|ENSG00000186974|ENSG00000121417|ENSG00000130726|ENSG00000121413|ENSG00000178935|ENSG00000152433|ENSG00000182318|ENSG00000152443|ENSG00000186230|ENSG00000180532|ENSG00000166704|ENSG00000152454|ENSG00000152467|ENSG00000099326|ENSG00000131845|ENSG00000131849…	8.04283e-18
26-chr19-62500000-67500000	ion binding	ENSG00000152475|ENSG00000186272|ENSG00000119574|ENSG00000083828|ENSG00000181894|ENSG00000173480|ENSG00000171606|ENSG00000176293|ENSG00000121406|ENSG00000121417|ENSG00000130726|ENSG00000121413|ENSG00000178935|ENSG00000152433|ENSG00000182318|ENSG00000152443|ENSG00000186230|ENSG00000180532|ENSG00000166704|ENSG00000152454|ENSG00000152467|ENSG00000099326|ENSG00000131845|ENSG00000131849|ENSG00000105132…	7.9278e-06
9-chr20-20000000-25000000	enzyme inhibitor activity	ENSG00000173335|ENSG00000101439|ENSG00000101441|ENSG00000101435|ENSG00000125823|ENSG00000125831|ENSG00000125815|ENSG00000077984|ENSG00000170373|ENSG00000170369|ENSG00000170367|	0.0236161
10-chr20-22500000-27500000	enzyme inhibitor activity	ENSG00000173335|ENSG00000101439|ENSG00000101441|ENSG00000101435|ENSG00000125823|ENSG00000125831|ENSG00000125815|ENSG00000077984|ENSG00000170373|ENSG00000170369|ENSG00000170367|	2.54193e-05
12-chr20-27500000-32500000	lipid binding	ENSG00000078898|ENSG00000198183|ENSG00000186190|ENSG00000186191|ENSG00000125999|ENSG00000167104|ENSG00000131059|ENSG00000131050|	0.00460176
13-chr20-30000000-35000000	lipid binding	ENSG00000078898|ENSG00000125976|ENSG00000198183|ENSG00000186190|ENSG00000186191|ENSG00000125999|ENSG00000167104|ENSG00000131059|ENSG00000131050|	4.82716e-12
17-chr20-40000000-45000000	enzyme inhibitor activity	ENSG00000175121|ENSG00000168703|ENSG00000124116|ENSG00000101448|ENSG00000101443|ENSG00000149651|ENSG00000149653|ENSG00000180305|ENSG00000158901|ENSG00000168734|ENSG00000124107|ENSG00000124102|ENSG00000168630|	1.66258e-08
18-chr20-42500000-47500000	enzyme inhibitor activity	ENSG00000175121|ENSG00000168703|ENSG00000124116|ENSG00000101448|ENSG00000101443|ENSG00000149651|ENSG00000149653|ENSG00000180305|ENSG00000158901|ENSG00000168734|ENSG00000124107|ENSG00000124102|ENSG00000168630|	0.0335193
8-chr22-17500000-22500000	antigen binding	ENSG00000100208|ENSG00000182843|ENSG00000185588|ENSG00000169575|	0.0335193
9-chr22-20000000-25000000	antigen binding	ENSG00000100208|ENSG00000182843|ENSG00000185588|ENSG00000169575|	0.0392108
10-chr22-22500000-27500000	structural constituent of eye lens	ENSG00000196431|ENSG00000100053|ENSG00000100058|ENSG00000100122|	0.0392108
13-chr22-30000000-35000000	lipid binding	ENSG00000100336|ENSG00000100342|ENSG00000184459|ENSG00000170420|ENSG00000128335|ENSG00000128284|ENSG00000128313|	0.0340494
41-chrX-100000000-105000000	translation factor activity, nucleic acid binding	ENSG00000180964|ENSG00000172465|ENSG00000184905|ENSG00000182916|ENSG00000133142|ENSG00000196507|	0.0397406

## Sheet: Pan troglodytes
Chromosome Location	GO term	Genes	FDR p-value
15-chr1-35000000-40000000	connexon complex	ENSPTRG00000022950|ENSPTRG00000024372|ENSPTRG00000000565|ENSPTRG00000023267|	0.00223389
55-chr1-135000000-140000000	membrane	ENSPTRG00000022863|ENSPTRG00000001514|ENSPTRG00000001512|ENSPTRG00000001513|ENSPTRG00000001467|ENSPTRG00000001510|ENSPTRG00000001535|ENSPTRG00000001540|ENSPTRG00000001536|ENSPTRG00000001542|ENSPTRG00000001458|ENSPTRG00000001538|ENSPTRG00000001453|ENSPTRG00000001549|ENSPTRG00000001451|ENSPTRG00000001550|ENSPTRG00000001556|ENSPTRG00000001557|ENSPTRG00000001554|ENSPTRG00000001555|ENSPTRG00000001444|…	0.0487166
56-chr1-137500000-142500000	membrane	ENSPTRG00000001579|ENSPTRG00000001574|ENSPTRG00000001575|ENSPTRG00000022863|ENSPTRG00000001514|ENSPTRG00000001512|ENSPTRG00000001513|ENSPTRG00000001510|ENSPTRG00000002435|ENSPTRG00000001535|ENSPTRG00000001540|ENSPTRG00000001536|ENSPTRG00000001542|ENSPTRG00000001538|ENSPTRG00000001549|ENSPTRG00000001550|ENSPTRG00000001556|ENSPTRG00000001557|ENSPTRG00000001554|ENSPTRG00000001555|ENSPTRG00000001558|…	0.0063604
45-chr2a-110000000-115000000	extracellular space	ENSPTRG00000012372|ENSPTRG00000012371|ENSPTRG00000012376|ENSPTRG00000012377|ENSPTRG00000012374|ENSPTRG00000012375|ENSPTRG00000012378|	0.0349957
46-chr2a-112500000-117500000	extracellular space	ENSPTRG00000012372|ENSPTRG00000012371|ENSPTRG00000012376|ENSPTRG00000012377|ENSPTRG00000012374|ENSPTRG00000012375|ENSPTRG00000012378|	0.00113377
68-chr2b-167500000-172500000	voltage-gated sodium channel complex	ENSPTRG00000012590|ENSPTRG00000012595|	0.0152305
15-chr3-35000000-40000000	voltage-gated sodium channel complex	ENSPTRG00000014763|ENSPTRG00000014762|ENSPTRG00000014764|	0.00130728
16-chr3-37500000-42500000	voltage-gated sodium channel complex	ENSPTRG00000014763|ENSPTRG00000014762|ENSPTRG00000014764|	0.00386232
22-chr4-52500000-57500000	extracellular space	ENSPTRG00000016163|ENSPTRG00000016161|ENSPTRG00000016160|ENSPTRG00000016167|ENSPTRG00000016166|ENSPTRG00000016181|ENSPTRG00000016183|ENSPTRG00000016182|ENSPTRG00000016197|ENSPTRG00000016158|ENSPTRG00000016159|ENSPTRG00000016157|ENSPTRG00000016154|ENSPTRG00000016155|ENSPTRG00000016152|ENSPTRG00000016150|ENSPTRG00000016151|	2.07182e-11
23-chr4-55000000-60000000	extracellular space	ENSPTRG00000016143|ENSPTRG00000016163|ENSPTRG00000016161|ENSPTRG00000016160|ENSPTRG00000016167|ENSPTRG00000016166|ENSPTRG00000016158|ENSPTRG00000016159|ENSPTRG00000016157|ENSPTRG00000016154|ENSPTRG00000016155|ENSPTRG00000016152|ENSPTRG00000016150|ENSPTRG00000016151|	4.63962e-09
63-chr4-155000000-160000000	fibrinogen complex	ENSPTRG00000016534|ENSPTRG00000016535|ENSPTRG00000016536|	0.000383087
64-chr4-157500000-162500000	fibrinogen complex	ENSPTRG00000016534|ENSPTRG00000016535|ENSPTRG00000016536|	0.000383087
30-chr5-72500000-77500000	membrane attack complex	ENSPTRG00000016826|ENSPTRG00000016824|ENSPTRG00000016816|	0.000739396
10-chr6-22500000-27500000	nucleosome	ENSPTRG00000017811|ENSPTRG00000017798|ENSPTRG00000017790|ENSPTRG00000017789|ENSPTRG00000017821|ENSPTRG00000017807|ENSPTRG00000017802|	1.61555e-07
11-chr6-25000000-30000000	nucleosome	ENSPTRG00000017838|ENSPTRG00000017811|ENSPTRG00000017798|ENSPTRG00000017790|ENSPTRG00000017789|ENSPTRG00000017821|ENSPTRG00000017807|ENSPTRG00000017802|	9.69046e-08
13-chr6-30000000-35000000	MHC protein complex	ENSPTRG00000018001|ENSPTRG00000018032|ENSPTRG00000018030|ENSPTRG00000018020|ENSPTRG00000018029|ENSPTRG00000023404|ENSPTRG00000023735|ENSPTRG00000017906|ENSPTRG00000017907|ENSPTRG00000017905|ENSPTRG00000018018|	3.08979e-16
14-chr6-32500000-37500000	MHC protein complex	ENSPTRG00000018001|ENSPTRG00000018032|ENSPTRG00000018030|ENSPTRG00000018020|ENSPTRG00000018029|ENSPTRG00000023404|ENSPTRG00000023735|ENSPTRG00000018018|	3.07018e-10
9-chr9-20000000-25000000	extracellular space	ENSPTRG00000020823|ENSPTRG00000020820|ENSPTRG00000020812|ENSPTRG00000020813|ENSPTRG00000020811|ENSPTRG00000020818|	0.00565077
2-chr11-2500000-7500000	membrane	ENSPTRG00000003301|ENSPTRG00000003305|ENSPTRG00000003304|ENSPTRG00000003306|ENSPTRG00000003308|ENSPTRG00000003292|ENSPTRG00000003291|ENSPTRG00000003279|ENSPTRG00000003278|ENSPTRG00000003200|ENSPTRG00000003274|ENSPTRG00000003202|ENSPTRG00000003298|ENSPTRG00000003276|ENSPTRG00000003204|ENSPTRG00000003273|ENSPTRG00000003272|ENSPTRG00000023535|ENSPTRG00000003256|ENSPTRG00000003255|ENSPTRG00000003252|…	0.00181945
40-chr11-97500000-102500000	extracellular matrix (sensu Metazoa)	ENSPTRG00000004219|ENSPTRG00000004216|ENSPTRG00000004217|ENSPTRG00000004215|ENSPTRG00000023318|ENSPTRG00000004222|ENSPTRG00000004221|ENSPTRG00000004220|	0.000925098
41-chr11-100000000-105000000	extracellular matrix (sensu Metazoa)	ENSPTRG00000004219|ENSPTRG00000004216|ENSPTRG00000004217|ENSPTRG00000004215|ENSPTRG00000004233|ENSPTRG00000023318|ENSPTRG00000004222|ENSPTRG00000004221|ENSPTRG00000004220|	0.000333779
14-chr12-32500000-37500000	non-membrane-bound organelle	ENSPTRG00000005080|ENSPTRG00000005081|ENSPTRG00000005118|ENSPTRG00000004973|ENSPTRG00000004972|ENSPTRG00000004977|ENSPTRG00000004976|ENSPTRG00000004975|ENSPTRG00000004974|ENSPTRG00000004995|ENSPTRG00000004994|ENSPTRG00000004978|ENSPTRG00000004996|ENSPTRG00000004991|ENSPTRG00000004990|ENSPTRG00000004993|ENSPTRG00000004992|ENSPTRG00000005034|ENSPTRG00000022987|ENSPTRG00000005024|ENSPTRG00000023043|…	0.000925098
15-chr12-35000000-40000000	non-membrane-bound organelle	ENSPTRG00000004973|ENSPTRG00000004972|ENSPTRG00000004977|ENSPTRG00000004976|ENSPTRG00000004975|ENSPTRG00000004974|ENSPTRG00000004995|ENSPTRG00000004994|ENSPTRG00000004978|ENSPTRG00000004996|ENSPTRG00000004991|ENSPTRG00000004990|ENSPTRG00000004993|ENSPTRG00000004992|ENSPTRG00000005034|ENSPTRG00000005024|ENSPTRG00000004928|ENSPTRG00000004921|ENSPTRG00000005009|ENSPTRG00000004988|ENSPTRG00000004982|…	0.000551466
6-chr17-12500000-17500000	non-membrane-bound organelle	ENSPTRG00000009232|ENSPTRG00000009119|ENSPTRG00000009236|ENSPTRG00000009289|ENSPTRG00000009270|ENSPTRG00000009134|ENSPTRG00000009135|ENSPTRG00000009130|ENSPTRG00000009132|ENSPTRG00000009149|ENSPTRG00000009141|ENSPTRG00000023885|ENSPTRG00000009140|ENSPTRG00000009269|ENSPTRG00000009211|ENSPTRG00000009212|ENSPTRG00000009214|ENSPTRG00000009158|ENSPTRG00000009159|ENSPTRG00000009163|ENSPTRG00000009162|…	2.56501e-10
7-chr17-15000000-20000000	intracellular	ENSPTRG00000009113|ENSPTRG00000009111|ENSPTRG00000009115|ENSPTRG00000009119|ENSPTRG00000009070|ENSPTRG00000009075|ENSPTRG00000009074|ENSPTRG00000009076|ENSPTRG00000009057|ENSPTRG00000009054|ENSPTRG00000009134|ENSPTRG00000009135|ENSPTRG00000009059|ENSPTRG00000009058|ENSPTRG00000009130|ENSPTRG00000009132|ENSPTRG00000009149|ENSPTRG00000009141|ENSPTRG00000023885|ENSPTRG00000009140|ENSPTRG00000023612|…	0.0349957
7-chr17-15000000-20000000	non-membrane-bound organelle	ENSPTRG00000009119|ENSPTRG00000009070|ENSPTRG00000009074|ENSPTRG00000009054|ENSPTRG00000009134|ENSPTRG00000009135|ENSPTRG00000009130|ENSPTRG00000009132|ENSPTRG00000009149|ENSPTRG00000009141|ENSPTRG00000023885|ENSPTRG00000009140|ENSPTRG00000009158|ENSPTRG00000009159|ENSPTRG00000009163|ENSPTRG00000009162|ENSPTRG00000009161|ENSPTRG00000009160|ENSPTRG00000009167|ENSPTRG00000009166|ENSPTRG00000009081|…	6.39637e-10
9-chr17-20000000-25000000	extracellular space	ENSPTRG00000009034|ENSPTRG00000009037|ENSPTRG00000009036|ENSPTRG00000009033|ENSPTRG00000009029|ENSPTRG00000009004|ENSPTRG00000009001|ENSPTRG00000009002|ENSPTRG00000008999|	0.00492328
25-chr19-60000000-65000000	membrane-bound organelle	ENSPTRG00000011568|ENSPTRG00000011566|ENSPTRG00000011567|ENSPTRG00000011565|ENSPTRG00000011562|ENSPTRG00000011563|ENSPTRG00000011561|ENSPTRG00000023511|ENSPTRG00000022929|ENSPTRG00000011548|ENSPTRG00000011549|ENSPTRG00000023310|ENSPTRG00000011539|ENSPTRG00000011537|ENSPTRG00000011536|ENSPTRG00000011546|ENSPTRG00000011547|ENSPTRG00000022667|ENSPTRG00000023008|ENSPTRG00000011512|ENSPTRG00000024292|…	0.00170845
26-chr19-62500000-67500000	intracellular organelle	ENSPTRG00000011568|ENSPTRG00000011566|ENSPTRG00000011567|ENSPTRG00000011565|ENSPTRG00000011562|ENSPTRG00000011563|ENSPTRG00000011561|ENSPTRG00000023511|ENSPTRG00000022929|ENSPTRG00000011548|ENSPTRG00000011549|ENSPTRG00000011546|ENSPTRG00000011547|ENSPTRG00000022667|ENSPTRG00000023008|ENSPTRG00000024292|ENSPTRG00000011571|ENSPTRG00000011577|ENSPTRG00000011597|ENSPTRG00000011596|ENSPTRG00000024363|…	0.000383087
26-chr19-62500000-67500000	membrane-bound organelle	ENSPTRG00000011568|ENSPTRG00000011566|ENSPTRG00000011567|ENSPTRG00000011565|ENSPTRG00000011562|ENSPTRG00000011563|ENSPTRG00000011561|ENSPTRG00000023511|ENSPTRG00000022929|ENSPTRG00000011548|ENSPTRG00000011549|ENSPTRG00000011546|ENSPTRG00000011547|ENSPTRG00000022667|ENSPTRG00000023008|ENSPTRG00000024292|ENSPTRG00000011571|ENSPTRG00000011577|ENSPTRG00000011597|ENSPTRG00000011596|ENSPTRG00000024363|…	8.53293e-06
55-chr1-135000000-140000000	intrinsic to membrane	ENSPTRG00000022863|ENSPTRG00000001514|ENSPTRG00000001512|ENSPTRG00000001513|ENSPTRG00000001458|ENSPTRG00000001453|ENSPTRG00000001451|ENSPTRG00000001550|ENSPTRG00000001556|ENSPTRG00000001557|ENSPTRG00000001554|ENSPTRG00000001555|ENSPTRG00000001439|ENSPTRG00000023410|ENSPTRG00000001436|ENSPTRG00000001499|ENSPTRG00000001498|ENSPTRG00000001497|ENSPTRG00000001509|ENSPTRG00000001508|ENSPTRG00000024322|…	0.0313692
56-chr1-137500000-142500000	intrinsic to membrane	ENSPTRG00000001579|ENSPTRG00000001574|ENSPTRG00000001575|ENSPTRG00000022863|ENSPTRG00000001514|ENSPTRG00000001512|ENSPTRG00000001513|ENSPTRG00000002435|ENSPTRG00000001550|ENSPTRG00000001556|ENSPTRG00000001557|ENSPTRG00000001554|ENSPTRG00000001555|ENSPTRG00000001558|ENSPTRG00000001559|ENSPTRG00000023410|ENSPTRG00000001581|ENSPTRG00000001499|ENSPTRG00000001584|ENSPTRG00000001560|ENSPTRG00000001603|…	0.000152575
64-chr2b-157500000-162500000	activin receptor complex	ENSPTRG00000012554|ENSPTRG00000012555|	0.0136227
65-chr2b-160000000-165000000	activin receptor complex	ENSPTRG00000012554|ENSPTRG00000012555|	0.0182808
32-chr3-77500000-82500000	axolemma	ENSPTRG00000015118|ENSPTRG00000015117|	0.00128214
63-chr4-155000000-160000000	fibrinogen complex	ENSPTRG00000016534|ENSPTRG00000016535|ENSPTRG00000016536|	0.000485464
64-chr4-157500000-162500000	fibrinogen complex	ENSPTRG00000016534|ENSPTRG00000016535|ENSPTRG00000016536|	0.00042839
30-chr5-72500000-77500000	membrane attack complex	ENSPTRG00000016826|ENSPTRG00000016824|ENSPTRG00000016816|	0.000955684
65-chr5-160000000-165000000	postsynaptic membrane	ENSPTRG00000017494|ENSPTRG00000017497|ENSPTRG00000017499|ENSPTRG00000022694|	0.00949405
66-chr5-162500000-167500000	postsynaptic membrane	ENSPTRG00000017494|ENSPTRG00000017497|ENSPTRG00000017499|ENSPTRG00000022694|	0.00131591
66-chr5-162500000-167500000	synapse	ENSPTRG00000017494|ENSPTRG00000017497|ENSPTRG00000017499|ENSPTRG00000022694|	0.013698
13-chr6-30000000-35000000	MHC class II protein complex	ENSPTRG00000018001|ENSPTRG00000018032|ENSPTRG00000018030|ENSPTRG00000018020|ENSPTRG00000018029|ENSPTRG00000023404|ENSPTRG00000023735|ENSPTRG00000018018|	1.9526e-14
14-chr6-32500000-37500000	MHC class II protein complex	ENSPTRG00000018001|ENSPTRG00000018032|ENSPTRG00000018030|ENSPTRG00000018020|ENSPTRG00000018029|ENSPTRG00000023404|ENSPTRG00000023735|ENSPTRG00000018018|	1.9526e-14
2-chr11-2500000-7500000	intrinsic to membrane	ENSPTRG00000003305|ENSPTRG00000003304|ENSPTRG00000003306|ENSPTRG00000003308|ENSPTRG00000003279|ENSPTRG00000003278|ENSPTRG00000003200|ENSPTRG00000003274|ENSPTRG00000003202|ENSPTRG00000003276|ENSPTRG00000003204|ENSPTRG00000003273|ENSPTRG00000003272|ENSPTRG00000023535|ENSPTRG00000003256|ENSPTRG00000003255|ENSPTRG00000003252|ENSPTRG00000023280|ENSPTRG00000003250|ENSPTRG00000003245|ENSPTRG00000003246|…	2.37004e-05
23-chr11-55000000-60000000	intrinsic to membrane	ENSPTRG00000003740|ENSPTRG00000003709|ENSPTRG00000003708|ENSPTRG00000003712|ENSPTRG00000003710|ENSPTRG00000003714|ENSPTRG00000003715|ENSPTRG00000003718|ENSPTRG00000003719|ENSPTRG00000003728|ENSPTRG00000003726|ENSPTRG00000003725|ENSPTRG00000003723|ENSPTRG00000003722|ENSPTRG00000003720|ENSPTRG00000003739|ENSPTRG00000003695|ENSPTRG00000003694|ENSPTRG00000003699|ENSPTRG00000003698|	0.0286474
24-chr11-57500000-62500000	intrinsic to membrane	ENSPTRG00000003740|ENSPTRG00000003784|ENSPTRG00000003799|ENSPTRG00000003777|ENSPTRG00000003792|ENSPTRG00000003791|ENSPTRG00000003796|ENSPTRG00000003709|ENSPTRG00000003708|ENSPTRG00000003797|ENSPTRG00000003794|ENSPTRG00000003795|ENSPTRG00000003712|ENSPTRG00000003710|ENSPTRG00000003816|ENSPTRG00000003714|ENSPTRG00000003715|ENSPTRG00000003718|ENSPTRG00000003719|ENSPTRG00000023694|ENSPTRG00000003800|…	0.0313692
46-chr11-112500000-117500000	T cell receptor complex	ENSPTRG00000004340|ENSPTRG00000004339|ENSPTRG00000004338|	0.0321062
46-chr11-112500000-117500000	chylomicron	ENSPTRG00000004313|ENSPTRG00000004315|ENSPTRG00000004314|	0.00926171
47-chr11-115000000-120000000	chylomicron	ENSPTRG00000004313|ENSPTRG00000004315|ENSPTRG00000004314|	0.0174764
53-chr11-130000000-135000000	beta-galactosidase complex	ENSPTRG00000004498|ENSPTRG00000004499|	0.0163406
54-chr11-132500000-137500000	beta-galactosidase complex	ENSPTRG00000004498|ENSPTRG00000004499|	0.0163406
14-chr12-32500000-37500000	cytoskeleton	ENSPTRG00000005080|ENSPTRG00000005118|ENSPTRG00000004973|ENSPTRG00000004972|ENSPTRG00000004977|ENSPTRG00000004976|ENSPTRG00000004975|ENSPTRG00000004974|ENSPTRG00000004995|ENSPTRG00000004994|ENSPTRG00000004978|ENSPTRG00000004996|ENSPTRG00000004991|ENSPTRG00000004990|ENSPTRG00000004993|ENSPTRG00000004992|ENSPTRG00000023043|ENSPTRG00000005009|ENSPTRG00000004988|ENSPTRG00000004982|ENSPTRG00000004983|…	5.71385e-05
14-chr12-32500000-37500000	intracellular non-membrane-bound organelle	ENSPTRG00000005080|ENSPTRG00000005081|ENSPTRG00000005118|ENSPTRG00000004973|ENSPTRG00000004972|ENSPTRG00000004977|ENSPTRG00000004976|ENSPTRG00000004975|ENSPTRG00000004974|ENSPTRG00000004995|ENSPTRG00000004994|ENSPTRG00000004978|ENSPTRG00000004996|ENSPTRG00000004991|ENSPTRG00000004990|ENSPTRG00000004993|ENSPTRG00000004992|ENSPTRG00000005034|ENSPTRG00000022987|ENSPTRG00000005024|ENSPTRG00000023043|…	0.00190537
15-chr12-35000000-40000000	cytoskeleton	ENSPTRG00000004973|ENSPTRG00000004972|ENSPTRG00000004977|ENSPTRG00000004976|ENSPTRG00000004975|ENSPTRG00000004974|ENSPTRG00000004995|ENSPTRG00000004994|ENSPTRG00000004978|ENSPTRG00000004996|ENSPTRG00000004991|ENSPTRG00000004990|ENSPTRG00000004993|ENSPTRG00000004992|ENSPTRG00000004928|ENSPTRG00000004921|ENSPTRG00000005009|ENSPTRG00000004988|ENSPTRG00000004982|ENSPTRG00000004983|ENSPTRG00000004969|…	3.23032e-06
15-chr12-35000000-40000000	intracellular non-membrane-bound organelle	ENSPTRG00000004973|ENSPTRG00000004972|ENSPTRG00000004977|ENSPTRG00000004976|ENSPTRG00000004975|ENSPTRG00000004974|ENSPTRG00000004995|ENSPTRG00000004994|ENSPTRG00000004978|ENSPTRG00000004996|ENSPTRG00000004991|ENSPTRG00000004990|ENSPTRG00000004993|ENSPTRG00000004992|ENSPTRG00000005034|ENSPTRG00000005024|ENSPTRG00000004928|ENSPTRG00000004921|ENSPTRG00000005009|ENSPTRG00000004988|ENSPTRG00000004982|…	0.00284249
6-chr17-12500000-17500000	cytoskeleton	ENSPTRG00000009119|ENSPTRG00000009236|ENSPTRG00000009289|ENSPTRG00000009270|ENSPTRG00000009132|ENSPTRG00000009149|ENSPTRG00000009141|ENSPTRG00000023885|ENSPTRG00000009140|ENSPTRG00000009211|ENSPTRG00000009214|ENSPTRG00000009158|ENSPTRG00000009159|ENSPTRG00000009163|ENSPTRG00000009162|ENSPTRG00000009161|ENSPTRG00000009160|ENSPTRG00000009167|ENSPTRG00000009166|ENSPTRG00000009165|ENSPTRG00000009164|…	2.10523e-12
6-chr17-12500000-17500000	intracellular non-membrane-bound organelle	ENSPTRG00000009232|ENSPTRG00000009119|ENSPTRG00000009236|ENSPTRG00000009289|ENSPTRG00000009270|ENSPTRG00000009132|ENSPTRG00000009149|ENSPTRG00000009141|ENSPTRG00000023885|ENSPTRG00000009140|ENSPTRG00000009269|ENSPTRG00000009211|ENSPTRG00000009212|ENSPTRG00000009214|ENSPTRG00000009158|ENSPTRG00000009159|ENSPTRG00000009163|ENSPTRG00000009162|ENSPTRG00000009161|ENSPTRG00000009160|ENSPTRG00000009167|…	1.3144e-09
7-chr17-15000000-20000000	cytoskeleton	ENSPTRG00000009119|ENSPTRG00000009070|ENSPTRG00000009132|ENSPTRG00000009149|ENSPTRG00000009141|ENSPTRG00000023885|ENSPTRG00000009140|ENSPTRG00000009158|ENSPTRG00000009159|ENSPTRG00000009163|ENSPTRG00000009162|ENSPTRG00000009161|ENSPTRG00000009160|ENSPTRG00000009167|ENSPTRG00000009166|ENSPTRG00000009081|ENSPTRG00000009165|ENSPTRG00000009164|ENSPTRG00000009168|ENSPTRG00000023269|ENSPTRG00000009171|…	3.1462e-12
7-chr17-15000000-20000000	intracellular non-membrane-bound organelle	ENSPTRG00000009119|ENSPTRG00000009070|ENSPTRG00000009074|ENSPTRG00000009132|ENSPTRG00000009149|ENSPTRG00000009141|ENSPTRG00000023885|ENSPTRG00000009140|ENSPTRG00000009158|ENSPTRG00000009159|ENSPTRG00000009163|ENSPTRG00000009162|ENSPTRG00000009161|ENSPTRG00000009160|ENSPTRG00000009167|ENSPTRG00000009166|ENSPTRG00000009081|ENSPTRG00000009165|ENSPTRG00000009164|ENSPTRG00000009168|ENSPTRG00000023269|…	1.49413e-09
9-chr19-20000000-25000000	nucleus	ENSPTRG00000010765|ENSPTRG00000010763|ENSPTRG00000010761|ENSPTRG00000010760|ENSPTRG00000023836|ENSPTRG00000022567|ENSPTRG00000010748|ENSPTRG00000010741|ENSPTRG00000010752|ENSPTRG00000010753|ENSPTRG00000010750|ENSPTRG00000010755|ENSPTRG00000023306|ENSPTRG00000010773|ENSPTRG00000023170|	0.0171278
17-chr19-40000000-45000000	nucleus	ENSPTRG00000023510|ENSPTRG00000010891|ENSPTRG00000010921|ENSPTRG00000010894|ENSPTRG00000010897|ENSPTRG00000010896|ENSPTRG00000010899|ENSPTRG00000010898|ENSPTRG00000024357|ENSPTRG00000010860|ENSPTRG00000024056|ENSPTRG00000024260|ENSPTRG00000010836|ENSPTRG00000010914|ENSPTRG00000010910|ENSPTRG00000010912|ENSPTRG00000010913|ENSPTRG00000010820|ENSPTRG00000010968|ENSPTRG00000010821|ENSPTRG00000010857|…	0.0432017
24-chr19-57500000-62500000	nucleus	ENSPTRG00000023486|ENSPTRG00000023310|ENSPTRG00000011539|ENSPTRG00000011537|ENSPTRG00000011536|ENSPTRG00000011398|ENSPTRG00000011519|ENSPTRG00000011518|ENSPTRG00000011478|ENSPTRG00000022886|ENSPTRG00000011409|ENSPTRG00000023428|ENSPTRG00000011404|ENSPTRG00000011407|ENSPTRG00000011406|ENSPTRG00000011403|ENSPTRG00000023421|ENSPTRG00000011402|ENSPTRG00000011418|ENSPTRG00000022586|ENSPTRG00000011412|…	0.0263099
25-chr19-60000000-65000000	intracellular membrane-bound organelle	ENSPTRG00000011568|ENSPTRG00000011566|ENSPTRG00000011567|ENSPTRG00000011565|ENSPTRG00000011562|ENSPTRG00000011563|ENSPTRG00000011561|ENSPTRG00000023511|ENSPTRG00000022929|ENSPTRG00000011548|ENSPTRG00000011549|ENSPTRG00000023310|ENSPTRG00000011539|ENSPTRG00000011537|ENSPTRG00000011536|ENSPTRG00000011546|ENSPTRG00000011547|ENSPTRG00000022667|ENSPTRG00000023008|ENSPTRG00000011519|ENSPTRG00000011518|…	0.0140604
25-chr19-60000000-65000000	nucleus	ENSPTRG00000011568|ENSPTRG00000011566|ENSPTRG00000011567|ENSPTRG00000011565|ENSPTRG00000011562|ENSPTRG00000011563|ENSPTRG00000011561|ENSPTRG00000023511|ENSPTRG00000022929|ENSPTRG00000011548|ENSPTRG00000011549|ENSPTRG00000023310|ENSPTRG00000011539|ENSPTRG00000011537|ENSPTRG00000011536|ENSPTRG00000011546|ENSPTRG00000011547|ENSPTRG00000022667|ENSPTRG00000023008|ENSPTRG00000011519|ENSPTRG00000011518|…	1.92641e-08
26-chr19-62500000-67500000	intracellular membrane-bound organelle	ENSPTRG00000011568|ENSPTRG00000011566|ENSPTRG00000011567|ENSPTRG00000011565|ENSPTRG00000011562|ENSPTRG00000011563|ENSPTRG00000011561|ENSPTRG00000023511|ENSPTRG00000022929|ENSPTRG00000011548|ENSPTRG00000011549|ENSPTRG00000011546|ENSPTRG00000011547|ENSPTRG00000022667|ENSPTRG00000023008|ENSPTRG00000011571|ENSPTRG00000011577|ENSPTRG00000011597|ENSPTRG00000011596|ENSPTRG00000024363|ENSPTRG00000011594|…	0.000265135
26-chr19-62500000-67500000	intracellular organelle	ENSPTRG00000011568|ENSPTRG00000011566|ENSPTRG00000011567|ENSPTRG00000011565|ENSPTRG00000011562|ENSPTRG00000011563|ENSPTRG00000011561|ENSPTRG00000023511|ENSPTRG00000022929|ENSPTRG00000011548|ENSPTRG00000011549|ENSPTRG00000011546|ENSPTRG00000011547|ENSPTRG00000022667|ENSPTRG00000023008|ENSPTRG00000011571|ENSPTRG00000011577|ENSPTRG00000011597|ENSPTRG00000011596|ENSPTRG00000024363|ENSPTRG00000011594|…	0.00949405
26-chr19-62500000-67500000	nucleus	ENSPTRG00000011568|ENSPTRG00000011566|ENSPTRG00000011567|ENSPTRG00000011565|ENSPTRG00000011562|ENSPTRG00000011563|ENSPTRG00000011561|ENSPTRG00000023511|ENSPTRG00000022929|ENSPTRG00000011548|ENSPTRG00000011549|ENSPTRG00000011546|ENSPTRG00000011547|ENSPTRG00000022667|ENSPTRG00000023008|ENSPTRG00000011571|ENSPTRG00000011577|ENSPTRG00000011597|ENSPTRG00000024363|ENSPTRG00000011594|ENSPTRG00000011593|…	2.4143e-09
56-chr1-137500000-142500000	integral to membrane	ENSPTRG00000001603|ENSPTRG00000001579|ENSPTRG00000001575|ENSPTRG00000001509|ENSPTRG00000001508|ENSPTRG00000024322|ENSPTRG00000001596|ENSPTRG00000001501|ENSPTRG00000001500|ENSPTRG00000022863|ENSPTRG00000001502|ENSPTRG00000001505|ENSPTRG00000001504|ENSPTRG00000001507|ENSPTRG00000001506|ENSPTRG00000001591|ENSPTRG00000001514|ENSPTRG00000001512|ENSPTRG00000001513|ENSPTRG00000023410|ENSPTRG00000001581|…	0.00321316
93-chr2b-230000000-235000000	sheet-forming collagen	ENSPTRG00000012992|ENSPTRG00000012991|	0.0422798
93-chr2b-230000000-235000000	collagen type IV	ENSPTRG00000012992|ENSPTRG00000012991|	0.0422798
65-chr5-160000000-165000000	postsynaptic membrane	ENSPTRG00000022694|ENSPTRG00000017497|ENSPTRG00000017499|ENSPTRG00000017494|	0.00604835
66-chr5-162500000-167500000	postsynaptic membrane	ENSPTRG00000022694|ENSPTRG00000017497|ENSPTRG00000017499|ENSPTRG00000017494|	0.00212598
13-chr6-30000000-35000000	immunological synapse	ENSPTRG00000023735|ENSPTRG00000017906|ENSPTRG00000017907|ENSPTRG00000017905|ENSPTRG00000018020|ENSPTRG00000018029|ENSPTRG00000023404|ENSPTRG00000018018|ENSPTRG00000018001|ENSPTRG00000018032|ENSPTRG00000018030|	4.1467e-13
14-chr6-32500000-37500000	immunological synapse	ENSPTRG00000023735|ENSPTRG00000018020|ENSPTRG00000018029|ENSPTRG00000023404|ENSPTRG00000018018|ENSPTRG00000018001|ENSPTRG00000018032|ENSPTRG00000018030|	7.73044e-08
11-chr7-25000000-30000000	nucleus	ENSPTRG00000023597|ENSPTRG00000019000|ENSPTRG00000019003|ENSPTRG00000019002|ENSPTRG00000019019|ENSPTRG00000019017|ENSPTRG00000019015|ENSPTRG00000019012|ENSPTRG00000019010|ENSPTRG00000019011|ENSPTRG00000019028|ENSPTRG00000019022|ENSPTRG00000019020|	0.0422798
1-chr11-0-5000000	integral to membrane	ENSPTRG00000003218|ENSPTRG00000003213|ENSPTRG00000003214|ENSPTRG00000003200|ENSPTRG00000003202|ENSPTRG00000003204|ENSPTRG00000003142|ENSPTRG00000023535|ENSPTRG00000003177|ENSPTRG00000003228|ENSPTRG00000023280|ENSPTRG00000003229|ENSPTRG00000003226|ENSPTRG00000003227|ENSPTRG00000003224|ENSPTRG00000003127|ENSPTRG00000003220|ENSPTRG00000003130|ENSPTRG00000003231|ENSPTRG00000003103|ENSPTRG00000003198|…	0.0422798
2-chr11-2500000-7500000	integral to membrane	ENSPTRG00000003218|ENSPTRG00000003305|ENSPTRG00000003304|ENSPTRG00000003306|ENSPTRG00000003213|ENSPTRG00000003308|ENSPTRG00000003214|ENSPTRG00000003279|ENSPTRG00000003278|ENSPTRG00000003200|ENSPTRG00000003274|ENSPTRG00000003202|ENSPTRG00000003276|ENSPTRG00000003204|ENSPTRG00000003273|ENSPTRG00000003272|ENSPTRG00000003268|ENSPTRG00000003282|ENSPTRG00000003269|ENSPTRG00000003260|ENSPTRG00000003261|…	7.47599e-06
23-chr11-55000000-60000000	integral to membrane	ENSPTRG00000003739|ENSPTRG00000003740|ENSPTRG00000003695|ENSPTRG00000003694|ENSPTRG00000003699|ENSPTRG00000003698|ENSPTRG00000003728|ENSPTRG00000003726|ENSPTRG00000003725|ENSPTRG00000003723|ENSPTRG00000003722|ENSPTRG00000003720|ENSPTRG00000003709|ENSPTRG00000003708|ENSPTRG00000003712|ENSPTRG00000003710|ENSPTRG00000003714|ENSPTRG00000003715|ENSPTRG00000003718|ENSPTRG00000003719|	0.0422798
24-chr11-57500000-62500000	integral to membrane	ENSPTRG00000003739|ENSPTRG00000003740|ENSPTRG00000024251|ENSPTRG00000003756|ENSPTRG00000003695|ENSPTRG00000003754|ENSPTRG00000003694|ENSPTRG00000003753|ENSPTRG00000003809|ENSPTRG00000003699|ENSPTRG00000003698|ENSPTRG00000003728|ENSPTRG00000003726|ENSPTRG00000003784|ENSPTRG00000003725|ENSPTRG00000003723|ENSPTRG00000003722|ENSPTRG00000003720|ENSPTRG00000003799|ENSPTRG00000003777|ENSPTRG00000003792|…	0.0462883
46-chr11-112500000-117500000	alpha-beta T cell receptor complex	ENSPTRG00000004340|ENSPTRG00000004339|ENSPTRG00000004338|	0.00212598
47-chr11-115000000-120000000	alpha-beta T cell receptor complex	ENSPTRG00000004340|ENSPTRG00000004339|ENSPTRG00000004338|	0.00495423
14-chr12-32500000-37500000	cytoskeleton	ENSPTRG00000005009|ENSPTRG00000005080|ENSPTRG00000005118|ENSPTRG00000004973|ENSPTRG00000004972|ENSPTRG00000004977|ENSPTRG00000004976|ENSPTRG00000004975|ENSPTRG00000004974|ENSPTRG00000004995|ENSPTRG00000004994|ENSPTRG00000004978|ENSPTRG00000004996|ENSPTRG00000004991|ENSPTRG00000004990|ENSPTRG00000004993|ENSPTRG00000004992|ENSPTRG00000004988|ENSPTRG00000023043|ENSPTRG00000004982|ENSPTRG00000004983|…	0.000139126
15-chr12-35000000-40000000	cytoskeleton	ENSPTRG00000005009|ENSPTRG00000004973|ENSPTRG00000004972|ENSPTRG00000004977|ENSPTRG00000004976|ENSPTRG00000004975|ENSPTRG00000004974|ENSPTRG00000004995|ENSPTRG00000004994|ENSPTRG00000004978|ENSPTRG00000004996|ENSPTRG00000004991|ENSPTRG00000004990|ENSPTRG00000004993|ENSPTRG00000004992|ENSPTRG00000004988|ENSPTRG00000004928|ENSPTRG00000004982|ENSPTRG00000004983|ENSPTRG00000004969|ENSPTRG00000004981|…	4.69537e-06
6-chr17-12500000-17500000	cytoskeleton	ENSPTRG00000009171|ENSPTRG00000009173|ENSPTRG00000009177|ENSPTRG00000009178|ENSPTRG00000009290|ENSPTRG00000009119|ENSPTRG00000009236|ENSPTRG00000009289|ENSPTRG00000023017|ENSPTRG00000009158|ENSPTRG00000009159|ENSPTRG00000009163|ENSPTRG00000009162|ENSPTRG00000009161|ENSPTRG00000009160|ENSPTRG00000009167|ENSPTRG00000009166|ENSPTRG00000009165|ENSPTRG00000009129|ENSPTRG00000009128|ENSPTRG00000009164|…	1.96817e-12
7-chr17-15000000-20000000	cytoskeleton	ENSPTRG00000009171|ENSPTRG00000009173|ENSPTRG00000009177|ENSPTRG00000009178|ENSPTRG00000009119|ENSPTRG00000023017|ENSPTRG00000009070|ENSPTRG00000009158|ENSPTRG00000009159|ENSPTRG00000009163|ENSPTRG00000009162|ENSPTRG00000009161|ENSPTRG00000009160|ENSPTRG00000009167|ENSPTRG00000009166|ENSPTRG00000009081|ENSPTRG00000009165|ENSPTRG00000009129|ENSPTRG00000009128|ENSPTRG00000009164|ENSPTRG00000009124|…	2.16315e-12
10-chr18-22500000-27500000	cell junction	ENSPTRG00000009939|ENSPTRG00000009941|ENSPTRG00000009940|ENSPTRG00000009946|ENSPTRG00000009948|	0.000456401
11-chr18-25000000-30000000	cell junction	ENSPTRG00000009941|ENSPTRG00000009940|ENSPTRG00000009946|ENSPTRG00000009948|	0.0436238
25-chr19-60000000-65000000	nucleus	ENSPTRG00000011568|ENSPTRG00000011566|ENSPTRG00000011567|ENSPTRG00000024199|ENSPTRG00000011565|ENSPTRG00000011562|ENSPTRG00000011563|ENSPTRG00000011561|ENSPTRG00000023511|ENSPTRG00000011559|ENSPTRG00000011558|ENSPTRG00000022929|ENSPTRG00000011557|ENSPTRG00000011555|ENSPTRG00000011548|ENSPTRG00000011549|ENSPTRG00000023310|ENSPTRG00000011539|ENSPTRG00000011577|ENSPTRG00000011597|ENSPTRG00000011537|…	7.89179e-07
26-chr19-62500000-67500000	nucleus	ENSPTRG00000011568|ENSPTRG00000011566|ENSPTRG00000011567|ENSPTRG00000011565|ENSPTRG00000011562|ENSPTRG00000011563|ENSPTRG00000011561|ENSPTRG00000023511|ENSPTRG00000011559|ENSPTRG00000011558|ENSPTRG00000022929|ENSPTRG00000011557|ENSPTRG00000011555|ENSPTRG00000011548|ENSPTRG00000011549|ENSPTRG00000011577|ENSPTRG00000011597|ENSPTRG00000024363|ENSPTRG00000023014|ENSPTRG00000011594|ENSPTRG00000011593|…	6.41148e-08
5-chr1-10000000-15000000	small protein conjugating enzyme activity	ENSPTRG00000000126|ENSPTRG00000000146|ENSPTRG00000000148|	0.0447585
55-chr1-135000000-140000000	receptor activity	ENSPTRG00000022863|ENSPTRG00000001514|ENSPTRG00000001512|ENSPTRG00000001513|ENSPTRG00000001451|ENSPTRG00000001556|ENSPTRG00000001554|ENSPTRG00000001555|ENSPTRG00000001439|ENSPTRG00000023410|ENSPTRG00000001493|ENSPTRG00000001497|ENSPTRG00000001509|ENSPTRG00000001508|ENSPTRG00000024322|ENSPTRG00000001502|ENSPTRG00000001505|ENSPTRG00000001478|ENSPTRG00000001504|ENSPTRG00000001507|ENSPTRG00000001506|…	2.61439e-06
56-chr1-137500000-142500000	receptor activity	ENSPTRG00000001579|ENSPTRG00000022863|ENSPTRG00000001514|ENSPTRG00000001512|ENSPTRG00000001513|ENSPTRG00000001556|ENSPTRG00000001554|ENSPTRG00000001555|ENSPTRG00000001558|ENSPTRG00000023410|ENSPTRG00000001582|ENSPTRG00000001567|ENSPTRG00000001560|ENSPTRG00000001603|ENSPTRG00000001509|ENSPTRG00000001508|ENSPTRG00000024322|ENSPTRG00000001597|ENSPTRG00000001502|ENSPTRG00000001505|ENSPTRG00000001592|…	4.7536e-08
91-chr1-225000000-230000000	receptor activity	ENSPTRG00000002199|ENSPTRG00000002215|ENSPTRG00000002217|ENSPTRG00000002219|ENSPTRG00000024052|ENSPTRG00000023676|ENSPTRG00000024319|ENSPTRG00000023137|ENSPTRG00000023262|ENSPTRG00000002221|ENSPTRG00000002220|ENSPTRG00000002223|ENSPTRG00000002205|ENSPTRG00000002202|ENSPTRG00000002200|ENSPTRG00000002209|ENSPTRG00000024299|	6.85675e-06
92-chr1-227500000-232500000	receptor activity	ENSPTRG00000002199|ENSPTRG00000002215|ENSPTRG00000002217|ENSPTRG00000002219|ENSPTRG00000024052|ENSPTRG00000023676|ENSPTRG00000024319|ENSPTRG00000023137|ENSPTRG00000023262|ENSPTRG00000002221|ENSPTRG00000002220|ENSPTRG00000002223|ENSPTRG00000002205|ENSPTRG00000002202|ENSPTRG00000002200|ENSPTRG00000002209|ENSPTRG00000024299|	3.77583e-07
36-chr2a-87500000-92500000	antigen binding	ENSPTRG00000012178|ENSPTRG00000012179|ENSPTRG00000012183|	0.0212612
46-chr2a-112500000-117500000	receptor binding	ENSPTRG00000012372|ENSPTRG00000012371|ENSPTRG00000012376|ENSPTRG00000012377|ENSPTRG00000012374|ENSPTRG00000012375|ENSPTRG00000012378|	0.00257988
46-chr2a-112500000-117500000	receptor signaling protein activity	ENSPTRG00000012376|ENSPTRG00000012377|ENSPTRG00000012374|ENSPTRG00000012378|	0.019667
72-chr2b-177500000-182500000	transcription factor activity	ENSPTRG00000012677|ENSPTRG00000012673|ENSPTRG00000012672|ENSPTRG00000012671|ENSPTRG00000012664|ENSPTRG00000012665|ENSPTRG00000012666|ENSPTRG00000012667|ENSPTRG00000012660|ENSPTRG00000012663|ENSPTRG00000012669|ENSPTRG00000012652|	1.69816e-05
73-chr2b-180000000-185000000	transcription factor activity	ENSPTRG00000012677|ENSPTRG00000012673|ENSPTRG00000012672|ENSPTRG00000012671|ENSPTRG00000012664|ENSPTRG00000012665|ENSPTRG00000012666|ENSPTRG00000012667|ENSPTRG00000012660|ENSPTRG00000012663|ENSPTRG00000012669|	1.57476e-05
73-chr2b-180000000-185000000	nucleic acid binding	ENSPTRG00000012686|ENSPTRG00000012677|ENSPTRG00000012673|ENSPTRG00000012672|ENSPTRG00000012671|ENSPTRG00000012664|ENSPTRG00000012665|ENSPTRG00000012666|ENSPTRG00000012667|ENSPTRG00000012660|ENSPTRG00000012663|ENSPTRG00000012669|ENSPTRG00000012696|	0.0199635
85-chr2b-210000000-215000000	structural constituent of eye lens	ENSPTRG00000012862|ENSPTRG00000012861|ENSPTRG00000012859|ENSPTRG00000012858|	6.71016e-05
86-chr2b-212500000-217500000	structural constituent of eye lens	ENSPTRG00000012862|ENSPTRG00000012861|ENSPTRG00000012859|ENSPTRG00000012858|	5.47924e-05
18-chr3-42500000-47500000	peptide binding	ENSPTRG00000014797|ENSPTRG00000014846|ENSPTRG00000014847|ENSPTRG00000014845|ENSPTRG00000014843|ENSPTRG00000014841|ENSPTRG00000014848|ENSPTRG00000014849|	1.24377e-05
19-chr3-45000000-50000000	peptide binding	ENSPTRG00000014846|ENSPTRG00000014847|ENSPTRG00000014845|ENSPTRG00000014843|ENSPTRG00000014841|ENSPTRG00000014848|ENSPTRG00000014849|	0.00137137
22-chr4-52500000-57500000	receptor binding	ENSPTRG00000016168|ENSPTRG00000016163|ENSPTRG00000016161|ENSPTRG00000016160|ENSPTRG00000016167|ENSPTRG00000016166|ENSPTRG00000016165|ENSPTRG00000016181|ENSPTRG00000016183|ENSPTRG00000016182|ENSPTRG00000016197|ENSPTRG00000016158|ENSPTRG00000016159|ENSPTRG00000016156|ENSPTRG00000016157|ENSPTRG00000016154|ENSPTRG00000016155|	2.17171e-09
23-chr4-55000000-60000000	receptor binding	ENSPTRG00000016168|ENSPTRG00000016163|ENSPTRG00000016161|ENSPTRG00000016160|ENSPTRG00000016167|ENSPTRG00000016166|ENSPTRG00000016165|ENSPTRG00000016158|ENSPTRG00000016159|ENSPTRG00000016156|ENSPTRG00000016157|ENSPTRG00000016154|ENSPTRG00000016155|	3.81681e-06
34-chr4-82500000-87500000	ion transporter activity	ENSPTRG00000016043|ENSPTRG00000016036|ENSPTRG00000016030|ENSPTRG00000016032|ENSPTRG00000016026|ENSPTRG00000016027|ENSPTRG00000016024|	0.00136481
35-chr4-85000000-90000000	ion transporter activity	ENSPTRG00000016030|ENSPTRG00000016032|ENSPTRG00000016253|ENSPTRG00000016026|ENSPTRG00000016027|ENSPTRG00000016024|	0.00530042
40-chr4-97500000-102500000	oxidoreductase activity	ENSPTRG00000024240|ENSPTRG00000016297|ENSPTRG00000018354|ENSPTRG00000023494|ENSPTRG00000016305|ENSPTRG00000016304|ENSPTRG00000016300|	0.00181534
41-chr4-100000000-105000000	oxidoreductase activity	ENSPTRG00000024240|ENSPTRG00000023060|ENSPTRG00000018354|ENSPTRG00000023494|ENSPTRG00000016305|ENSPTRG00000016304|ENSPTRG00000016300|	0.0146783
65-chr5-160000000-165000000	neurotransmitter binding	ENSPTRG00000017494|ENSPTRG00000017497|ENSPTRG00000017499|ENSPTRG00000022694|	0.0079981
66-chr5-162500000-167500000	ion transporter activity	ENSPTRG00000017493|ENSPTRG00000017494|ENSPTRG00000017497|ENSPTRG00000017499|ENSPTRG00000022694|	0.0421973
66-chr5-162500000-167500000	neurotransmitter binding	ENSPTRG00000017494|ENSPTRG00000017497|ENSPTRG00000017499|ENSPTRG00000022694|	0.00121235
11-chr6-25000000-30000000	nucleic acid binding	ENSPTRG00000017838|ENSPTRG00000017836|ENSPTRG00000017837|ENSPTRG00000017811|ENSPTRG00000024144|ENSPTRG00000017798|ENSPTRG00000017885|ENSPTRG00000017790|ENSPTRG00000017883|ENSPTRG00000017880|ENSPTRG00000017789|ENSPTRG00000022859|ENSPTRG00000017876|ENSPTRG00000017874|ENSPTRG00000023125|ENSPTRG00000017875|ENSPTRG00000017873|ENSPTRG00000017870|ENSPTRG00000017871|ENSPTRG00000024278|ENSPTRG00000017847|…	0.00654449
12-chr6-27500000-32500000	transcription factor activity	ENSPTRG00000024144|ENSPTRG00000017880|ENSPTRG00000017920|ENSPTRG00000022859|ENSPTRG00000017952|ENSPTRG00000017876|ENSPTRG00000017874|ENSPTRG00000023125|ENSPTRG00000017875|ENSPTRG00000017873|ENSPTRG00000017870|ENSPTRG00000017871|ENSPTRG00000024278|ENSPTRG00000023946|	0.00280961
12-chr6-27500000-32500000	nucleic acid binding	ENSPTRG00000017838|ENSPTRG00000017914|ENSPTRG00000024332|ENSPTRG00000017986|ENSPTRG00000024144|ENSPTRG00000017983|ENSPTRG00000017885|ENSPTRG00000017883|ENSPTRG00000017880|ENSPTRG00000017920|ENSPTRG00000022859|ENSPTRG00000017952|ENSPTRG00000017876|ENSPTRG00000017874|ENSPTRG00000023125|ENSPTRG00000017875|ENSPTRG00000017873|ENSPTRG00000017870|ENSPTRG00000017871|ENSPTRG00000017973|ENSPTRG00000024278|…	0.0140061
11-chr7-25000000-30000000	transcription factor activity	ENSPTRG00000019000|ENSPTRG00000019019|ENSPTRG00000019017|ENSPTRG00000019015|ENSPTRG00000019012|ENSPTRG00000019010|ENSPTRG00000019011|ENSPTRG00000019028|ENSPTRG00000019022|ENSPTRG00000019020|ENSPTRG00000023597|	3.0268e-05
11-chr7-25000000-30000000	nucleic acid binding	ENSPTRG00000019000|ENSPTRG00000019002|ENSPTRG00000019019|ENSPTRG00000019017|ENSPTRG00000019015|ENSPTRG00000019012|ENSPTRG00000019010|ENSPTRG00000019011|ENSPTRG00000019028|ENSPTRG00000019022|ENSPTRG00000019020|ENSPTRG00000023597|ENSPTRG00000018995|	0.0432217
34-chr7-82500000-87500000	xenobiotic transporter activity	ENSPTRG00000019369|ENSPTRG00000024082|	0.00285127
34-chr7-82500000-87500000	drug transporter activity	ENSPTRG00000019369|ENSPTRG00000024082|	0.0338329
35-chr7-85000000-90000000	xenobiotic transporter activity	ENSPTRG00000019369|ENSPTRG00000024082|	0.00774474
3-chr9-5000000-10000000	receptor binding	ENSPTRG00000020751|ENSPTRG00000020750|ENSPTRG00000020755|ENSPTRG00000020744|ENSPTRG00000020748|ENSPTRG00000020762|	0.019667
9-chr9-20000000-25000000	receptor binding	ENSPTRG00000020823|ENSPTRG00000020820|ENSPTRG00000020812|ENSPTRG00000020813|ENSPTRG00000020811|ENSPTRG00000020818|	0.019667
49-chr9-120000000-125000000	receptor activity	ENSPTRG00000021327|ENSPTRG00000021329|ENSPTRG00000021328|ENSPTRG00000021330|ENSPTRG00000021332|ENSPTRG00000021333|ENSPTRG00000021335|ENSPTRG00000021336|ENSPTRG00000021337|ENSPTRG00000021356|ENSPTRG00000021357|ENSPTRG00000021358|ENSPTRG00000021359|ENSPTRG00000021303|	0.00400473
38-chr10-92500000-97500000	tetrapyrrole binding	ENSPTRG00000002780|ENSPTRG00000002781|ENSPTRG00000002779|ENSPTRG00000002762|ENSPTRG00000002763|	0.00182601
1-chr11-0-5000000	receptor activity	ENSPTRG00000003202|ENSPTRG00000023535|ENSPTRG00000023280|ENSPTRG00000003231|ENSPTRG00000003199|ENSPTRG00000003233|ENSPTRG00000003235|ENSPTRG00000022836|ENSPTRG00000003234|ENSPTRG00000003236|ENSPTRG00000003193|ENSPTRG00000003228|ENSPTRG00000003229|ENSPTRG00000003226|ENSPTRG00000003227|ENSPTRG00000003224|ENSPTRG00000003220|ENSPTRG00000003218|ENSPTRG00000003213|ENSPTRG00000003214|	0.0024554
2-chr11-2500000-7500000	receptor activity	ENSPTRG00000003305|ENSPTRG00000003304|ENSPTRG00000003306|ENSPTRG00000003308|ENSPTRG00000003279|ENSPTRG00000003278|ENSPTRG00000003274|ENSPTRG00000003202|ENSPTRG00000003276|ENSPTRG00000003273|ENSPTRG00000003272|ENSPTRG00000023535|ENSPTRG00000003256|ENSPTRG00000003255|ENSPTRG00000003252|ENSPTRG00000023280|ENSPTRG00000003250|ENSPTRG00000003245|ENSPTRG00000003246|ENSPTRG00000003247|ENSPTRG00000003248|…	8.04919e-21
3-chr11-5000000-10000000	receptor activity	ENSPTRG00000003305|ENSPTRG00000003304|ENSPTRG00000003306|ENSPTRG00000003308|ENSPTRG00000003279|ENSPTRG00000003278|ENSPTRG00000003274|ENSPTRG00000003276|ENSPTRG00000003273|ENSPTRG00000003272|ENSPTRG00000003256|ENSPTRG00000003255|ENSPTRG00000003252|ENSPTRG00000003250|ENSPTRG00000003323|ENSPTRG00000003322|ENSPTRG00000003321|ENSPTRG00000003320|ENSPTRG00000003327|ENSPTRG00000003245|ENSPTRG00000003246|…	2.49171e-11
23-chr11-55000000-60000000	receptor activity	ENSPTRG00000003709|ENSPTRG00000003708|ENSPTRG00000003712|ENSPTRG00000003710|ENSPTRG00000003714|ENSPTRG00000003715|ENSPTRG00000003718|ENSPTRG00000003719|ENSPTRG00000003728|ENSPTRG00000003722|ENSPTRG00000003720|ENSPTRG00000003695|ENSPTRG00000003694|ENSPTRG00000003698|	7.2142e-05
46-chr11-112500000-117500000	lipid transporter activity	ENSPTRG00000004313|ENSPTRG00000004316|ENSPTRG00000004315|ENSPTRG00000004314|	0.0439269
49-chr11-120000000-125000000	receptor activity	ENSPTRG00000004434|ENSPTRG00000004435|ENSPTRG00000004414|ENSPTRG00000004415|ENSPTRG00000004416|ENSPTRG00000004410|ENSPTRG00000004412|ENSPTRG00000004413|ENSPTRG00000004418|ENSPTRG00000024368|ENSPTRG00000024271|ENSPTRG00000022911|ENSPTRG00000022807|ENSPTRG00000004398|ENSPTRG00000004420|ENSPTRG00000023655|	0.00182601
50-chr11-122500000-127500000	receptor activity	ENSPTRG00000004434|ENSPTRG00000004435|ENSPTRG00000004414|ENSPTRG00000004415|ENSPTRG00000004416|ENSPTRG00000004410|ENSPTRG00000004412|ENSPTRG00000004413|ENSPTRG00000004418|ENSPTRG00000024368|ENSPTRG00000024271|ENSPTRG00000022911|ENSPTRG00000004458|ENSPTRG00000022807|ENSPTRG00000004420|ENSPTRG00000023655|	0.00128216
3-chr12-5000000-10000000	carbohydrate binding	ENSPTRG00000004618|ENSPTRG00000004638|ENSPTRG00000004639|ENSPTRG00000004631|ENSPTRG00000004649|ENSPTRG00000004648|ENSPTRG00000004656|ENSPTRG00000004657|	0.0187082
4-chr12-7500000-12500000	carbohydrate binding	ENSPTRG00000004663|ENSPTRG00000004662|ENSPTRG00000004661|ENSPTRG00000004660|ENSPTRG00000004667|ENSPTRG00000004666|ENSPTRG00000004665|ENSPTRG00000004664|ENSPTRG00000004668|ENSPTRG00000004618|ENSPTRG00000022678|ENSPTRG00000004638|ENSPTRG00000004639|ENSPTRG00000004631|ENSPTRG00000004649|ENSPTRG00000004648|ENSPTRG00000004656|ENSPTRG00000004657|ENSPTRG00000004658|ENSPTRG00000004659|ENSPTRG00000004671|…	4.4565e-23
4-chr12-7500000-12500000	receptor activity	ENSPTRG00000004663|ENSPTRG00000004660|ENSPTRG00000004667|ENSPTRG00000004666|ENSPTRG00000004664|ENSPTRG00000004684|ENSPTRG00000004668|ENSPTRG00000004683|ENSPTRG00000004682|ENSPTRG00000004612|ENSPTRG00000022678|ENSPTRG00000004630|ENSPTRG00000004631|ENSPTRG00000004649|ENSPTRG00000004648|ENSPTRG00000004656|ENSPTRG00000004657|ENSPTRG00000004659|ENSPTRG00000004671|ENSPTRG00000004672|ENSPTRG00000004676|…	3.52793e-06
5-chr12-10000000-15000000	carbohydrate binding	ENSPTRG00000004663|ENSPTRG00000004662|ENSPTRG00000004661|ENSPTRG00000004660|ENSPTRG00000004667|ENSPTRG00000004666|ENSPTRG00000004665|ENSPTRG00000004664|ENSPTRG00000004668|ENSPTRG00000022678|ENSPTRG00000004658|ENSPTRG00000004659|ENSPTRG00000004671|ENSPTRG00000004672|ENSPTRG00000004676|ENSPTRG00000004678|	5.62083e-14
5-chr12-10000000-15000000	receptor activity	ENSPTRG00000004663|ENSPTRG00000004660|ENSPTRG00000004667|ENSPTRG00000004666|ENSPTRG00000004664|ENSPTRG00000004684|ENSPTRG00000004668|ENSPTRG00000004683|ENSPTRG00000004682|ENSPTRG00000004701|ENSPTRG00000022678|ENSPTRG00000004659|ENSPTRG00000004671|ENSPTRG00000004672|ENSPTRG00000004676|ENSPTRG00000004718|ENSPTRG00000004678|ENSPTRG00000004696|ENSPTRG00000004711|ENSPTRG00000004710|	6.22882e-07
15-chr12-35000000-40000000	transcription factor activity	ENSPTRG00000005031|ENSPTRG00000005032|ENSPTRG00000022997|ENSPTRG00000005036|ENSPTRG00000005028|ENSPTRG00000005029|ENSPTRG00000005026|ENSPTRG00000005025|ENSPTRG00000005022|ENSPTRG00000004927|ENSPTRG00000005014|ENSPTRG00000005007|ENSPTRG00000004941|ENSPTRG00000004949|ENSPTRG00000004966|	0.0352608
15-chr12-35000000-40000000	water transporter activity	ENSPTRG00000004920|ENSPTRG00000004919|ENSPTRG00000004918|	0.0413786
16-chr12-37500000-42500000	water transporter activity	ENSPTRG00000004920|ENSPTRG00000004919|ENSPTRG00000004918|	0.0212612
37-chr14-90000000-95000000	enzyme inhibitor activity	ENSPTRG00000023582|ENSPTRG00000006685|ENSPTRG00000006683|ENSPTRG00000006682|ENSPTRG00000006681|ENSPTRG00000006680|ENSPTRG00000023666|ENSPTRG00000006677|ENSPTRG00000006678|	3.52793e-06
38-chr14-92500000-97500000	enzyme inhibitor activity	ENSPTRG00000023582|ENSPTRG00000006685|ENSPTRG00000006683|ENSPTRG00000006682|ENSPTRG00000006681|ENSPTRG00000006680|ENSPTRG00000023666|ENSPTRG00000006677|ENSPTRG00000006678|	4.54943e-06
1-chr17-0-5000000	receptor activity	ENSPTRG00000008576|ENSPTRG00000008575|ENSPTRG00000008603|ENSPTRG00000008604|ENSPTRG00000008580|ENSPTRG00000008612|ENSPTRG00000008555|ENSPTRG00000008554|ENSPTRG00000008557|ENSPTRG00000008559|ENSPTRG00000008541|ENSPTRG00000008560|ENSPTRG00000008562|ENSPTRG00000008564|ENSPTRG00000008565|ENSPTRG00000008566|	0.010993
6-chr17-12500000-17500000	structural constituent of cytoskeleton	ENSPTRG00000009289|ENSPTRG00000009135|ENSPTRG00000009161|ENSPTRG00000009167|ENSPTRG00000009166|ENSPTRG00000009168|ENSPTRG00000009171|ENSPTRG00000009173|	2.3333e-05
7-chr17-15000000-20000000	structural constituent of cytoskeleton	ENSPTRG00000009135|ENSPTRG00000009161|ENSPTRG00000009167|ENSPTRG00000009166|ENSPTRG00000009168|ENSPTRG00000009171|ENSPTRG00000009173|	0.000138018
9-chr17-20000000-25000000	receptor binding	ENSPTRG00000009034|ENSPTRG00000009037|ENSPTRG00000009043|ENSPTRG00000009036|ENSPTRG00000009033|ENSPTRG00000009029|ENSPTRG00000009004|ENSPTRG00000009001|ENSPTRG00000009002|ENSPTRG00000008999|	0.00239709
18-chr17-42500000-47500000	microfilament motor activity	ENSPTRG00000008771|ENSPTRG00000008770|ENSPTRG00000008773|	0.00116177
19-chr17-45000000-50000000	microfilament motor activity	ENSPTRG00000008771|ENSPTRG00000008770|ENSPTRG00000008773|	0.0199635
22-chr17-52500000-57500000	peroxidase activity	ENSPTRG00000009446|ENSPTRG00000009448|ENSPTRG00000009449|	0.0106401
23-chr17-55000000-60000000	peroxidase activity	ENSPTRG00000009446|ENSPTRG00000009448|ENSPTRG00000009449|	0.0207285
24-chr18-57500000-62500000	enzyme inhibitor activity	ENSPTRG00000024181|ENSPTRG00000023897|ENSPTRG00000010091|ENSPTRG00000010090|ENSPTRG00000010086|ENSPTRG00000010084|ENSPTRG00000010085|	1.55676e-05
25-chr18-60000000-65000000	enzyme inhibitor activity	ENSPTRG00000024181|ENSPTRG00000023897|ENSPTRG00000010091|ENSPTRG00000010090|ENSPTRG00000010086|ENSPTRG00000010084|ENSPTRG00000010085|	5.15305e-08
9-chr19-20000000-25000000	nucleic acid binding	ENSPTRG00000010765|ENSPTRG00000010763|ENSPTRG00000010761|ENSPTRG00000010760|ENSPTRG00000023836|ENSPTRG00000023813|ENSPTRG00000022567|ENSPTRG00000010748|ENSPTRG00000010752|ENSPTRG00000010753|ENSPTRG00000010750|ENSPTRG00000010755|ENSPTRG00000023306|ENSPTRG00000010770|ENSPTRG00000010773|ENSPTRG00000023170|	1.97611e-05
[truncated: 623 more rows]

## Sheet: Mus musculus
Chromosome Location	GO term	Genes	FDR p-value
[truncated: 1,468 more rows]

[truncated: 6 more sheets: Rattus norvegicus, Danio rerio, Gallus gallus, Drosophila melanogaster, Caernohabditis elegans, Arabidopsis thaliana]
